# Supplementary material for: Migrating mesoderm cells self-organize into a dynamic meshwork structure during chick gastrulation
Source: eLife. 2025 Aug 21;14:e84749. doi: 10.7554/eLife.84749 (PMC12578438; doi:10.7554/eLife.84749)
Supplement: Figure 1—source data 1. [file elife-84749-fig1-data1.xlsx]

## Sheet: FrontPage
	Supplemental Information for: Migrating mesoderm cells self-organize into a dynamic meshwork structure during chick gastrulation Yukiko Nakaya, Mitsusuke Tarama, Sohei Tasaki, Ayako Isomura, Tatsuo Shibata Laboratory for Physical Biology, RIKEN Center for Biosystems Dynamics Research, Kobe 650-0047, Japan. Trajectories of mesoderm cell used for Fig. 1 and its figure supplement 1
	Trajectory data of six embryos at three region (anterior, middle and posterior) used in Fig. 1 and Supplementary Fig. S1.
		Sheet name		Embryo ID	Position	Unit	time step (min.)
		embryo-1-Anterior		1	Anterior	µm	1
		embryo-1-Middle		1	Middle	µm	1
		embryo-1-Posterior		1	Posterior	µm	1
		embryo-2-Anterior		2	Anterior	µm	1
		embryo-2-Middle		2	Middle	µm	1
		embryo-2-Posterior		2	Posterior	µm	1
		embryo-3-Anterior		3	Anterior	µm	1
		embryo-3-Middle		3	Middle	µm	1
		embryo-3-Posterior		3	Posterior	µm	1
		embryo-4-Anterior		4	Anterior	µm	1
		embryo-4-Middle		4	Middle	µm	1
		embryo-4-Posterior		4	Posterior	µm	1
		embryo-5-Anterior		5	Anterior	µm	1
		embryo-5-Middle		5	Middle	µm	1
		embryo-5-Posterior		5	Posterior	µm	1
		embryo-6-Anterior		6	Anterior	µm	1
		embryo-6-Middle		6	Middle	µm	1
		embryo-6-Posterior		6	Posterior	µm	1

## Sheet: embryo-1-Anterior
Position
Position X	Position Y	Position Z	Time	TrackID
107.908	172.778	6016.08	1	1000000000
109.234	21.0237	6021.26	1	1000000001
52.1159	246.172	6021.94	1	1000000002
33.9527	57.7068	6023.66	1	1000000003
85.2908	65.3013	6023.17	1	1000000004
35.5059	153.28	6022.97	1	1000000005
114.318	10.0167	6024.7	1	1000000006
151.075	60.8528	6026.31	1	1000000007
56.1183	169.301	6026.27	1	1000000008
124.092	35.7748	6028.06	1	1000000009
156.949	46.5846	6027.22	1	1000000010
110.214	79.6907	6027.46	1	1000000011
20.5443	113.004	6028.85	1	1000000012
190.236	159.214	6030.49	1	1000000013
164.889	165.481	6031.09	1	1000000014
70.8155	168.136	6030.55	1	1000000015
198.05	170.482	6030.26	1	1000000016
156.372	35.5517	6032.02	1	1000000017
136.154	174.673	6032.57	1	1000000018
146.196	178.382	6031.85	1	1000000019
68.9202	11.4309	6035.04	1	1000000020
217.806	50.624	6034.15	1	1000000021
65.7041	81.274	6033.77	1	1000000022
176.526	224.824	6034.31	1	1000000023
178.939	119.075	6036.67	1	1000000024
211.497	165.439	6036.83	1	1000000025
223.058	172.124	6037.79	1	1000000026
244.031	178.837	6036.54	1	1000000027
245.233	-5.96046e-08	6038.58	1	1000000028
57.2564	4.87142	6039.54	1	1000000029
116.639	75.3692	6039.59	1	1000000030
96.5718	116.579	6038.52	1	1000000031
156.606	121.205	6039.16	1	1000000032
228.658	243.16	6037.95	1	1000000033
488.102	34.6702	6013.53	1	1000000034
442.76	45.5418	6015.58	1	1000000035
349.199	67.004	6015.52	1	1000000036
451.307	15.8117	6017.15	1	1000000037
408.007	92.0994	6018	1	1000000038
302.947	10.6258	6019.46	1	1000000039
500.607	50.2272	6020.01	1	1000000040
398.927	81.4264	6019.44	1	1000000041
452.384	44.9325	6021.15	1	1000000042
290.632	62.778	6022.25	1	1000000043
473.744	89.0265	6021.94	1	1000000044
357.015	132.256	6022.15	1	1000000045
314.181	137.219	6021.72	1	1000000046
489.535	148.612	6022.33	1	1000000047
506.94	153.949	6020.52	1	1000000048
260.088	22.2679	6023.76	1	1000000049
482.185	23.4251	6023.51	1	1000000050
488.347	82.7426	6024.42	1	1000000051
340.553	85.6831	6022.84	1	1000000052
335.627	108.213	6024.25	1	1000000053
292.458	130.591	6023.35	1	1000000054
476.728	130.948	6023.69	1	1000000055
408.328	150.256	6022.63	1	1000000056
388.449	157.218	6023.6	1	1000000057
397.882	16.0353	6026.89	1	1000000058
297.247	51.4152	6026.11	1	1000000059
254.693	59.7433	6025.99	1	1000000060
414.319	72.1901	6025.98	1	1000000061
313.53	85.237	6025.63	1	1000000062
342.566	93.2789	6025.87	1	1000000063
436.274	111.252	6026.69	1	1000000064
453.992	147.662	6025.61	1	1000000065
489.204	162.023	6026.75	1	1000000066
488.963	179.843	6026.75	1	1000000067
505.06	178.372	6025.4	1	1000000068
492.989	229.244	6025.27	1	1000000069
339.055	67.2856	6028.41	1	1000000070
503.926	77.1257	6027.36	1	1000000071
356.778	116.928	6027.9	1	1000000072
419.514	153.662	6028.74	1	1000000073
498.438	163.1	6028.98	1	1000000074
428.276	183.521	6027.63	1	1000000075
282.779	192.352	6028.94	1	1000000076
485.277	192.34	6027.91	1	1000000077
416.463	15.9945	6029.93	1	1000000078
469.914	103.529	6029.75	1	1000000079
454.689	134.683	6029.95	1	1000000080
363.813	161.386	6029.54	1	1000000081
321.782	179.67	6029.1	1	1000000082
461.329	216.799	6030.86	1	1000000083
405.937	248.145	6029.3	1	1000000084
351.326	49.7806	6032.49	1	1000000085
399.032	117.712	6031.7	1	1000000086
498.237	148.774	6032.44	1	1000000087
404.96	159.918	6032.2	1	1000000088
366.712	178.872	6033.08	1	1000000089
392.405	180.296	6032.83	1	1000000090
423.627	194.273	6031.31	1	1000000091
374.673	236.403	6031.98	1	1000000092
398.943	238.519	6031.74	1	1000000093
441.07	239.65	6031.79	1	1000000094
377.862	123.234	6034.01	1	1000000095
277.847	140.262	6035.49	1	1000000096
462.504	204.348	6033.52	1	1000000097
281.732	246.43	6033.85	1	1000000098
447.716	248.84	6034.37	1	1000000099
484.602	247.899	6035.15	1	1000000100
320.91	42.0433	6036.74	1	1000000101
423.063	107.305	6035.96	1	1000000102
409.677	166.333	6037.29	1	1000000103
307.364	47.7635	6039.5	1	1000000104
363.168	48.086	6038.33	1	1000000105
287.757	99.8036	6039.1	1	1000000106
358.683	122.893	6037.96	1	1000000107
380.373	134.323	6039.35	1	1000000108
276.978	180.621	6038.47	1	1000000109
380.242	203.537	6038.33	1	1000000110
338.099	229.052	6039.25	1	1000000111
254.448	252.083	6038.48	1	1000000112
209.505	390.894	6024.65	1	1000000113
61.8907	398.437	6022.56	1	1000000114
98.4245	304.306	6025.56	1	1000000115
210.305	361.919	6027.71	1	1000000116
145.452	270.342	6028.12	1	1000000117
112.546	278.436	6027.76	1	1000000118
152.569	295.065	6027.97	1	1000000119
144.042	325.673	6028.9	1	1000000120
156.392	335.589	6028.7	1	1000000121
110.411	415.93	6028.92	1	1000000122
86.417	493.404	6028.14	1	1000000123
153.275	309.71	6029.5	1	1000000124
121.339	311.814	6031.19	1	1000000125
182.553	318.11	6030.23	1	1000000126
104.3	345.134	6030.81	1	1000000127
205.462	362.167	6029.47	1	1000000128
226.761	399.346	6030.91	1	1000000129
78.4269	409.345	6030.01	1	1000000130
143.193	425.421	6029.8	1	1000000131
79.7621	429.76	6031.17	1	1000000132
99.1167	453.613	6031	1	1000000133
189.056	362.062	6033.06	1	1000000134
215.231	419.779	6031.91	1	1000000135
175.27	291.617	6034.36	1	1000000136
61.1742	305.067	6034.86	1	1000000137
248.466	317.588	6035.57	1	1000000138
162.242	413.335	6033.91	1	1000000139
123.597	429.745	6033.76	1	1000000140
174.184	467.28	6034.19	1	1000000141
139.471	494.388	6033.88	1	1000000142
238.923	291.378	6036.77	1	1000000143
252.085	379.6	6037.81	1	1000000144
219.996	393.874	6035.78	1	1000000145
51.3428	399.478	6036.43	1	1000000146
145.655	291.252	6039.77	1	1000000147
154.908	308.765	6039.63	1	1000000148
-5.96046e-08	355.721	6039.83	1	1000000149
93.7604	429.965	6038.07	1	1000000150
176.732	437.609	6039.44	1	1000000151
441.026	339.382	6022	1	1000000152
482.28	307.048	6024.2	1	1000000153
371.828	256.693	6026.03	1	1000000154
506.94	307.165	6025.97	1	1000000155
481.923	451.021	6026.54	1	1000000156
465.295	292.603	6028.96	1	1000000157
506.94	317.471	6028.21	1	1000000158
390.055	323.378	6027.94	1	1000000159
434.875	368.15	6027.51	1	1000000160
447.326	390.961	6028.89	1	1000000161
478.089	407.759	6028.76	1	1000000162
259.246	276.831	6029.95	1	1000000163
361.244	337.393	6030.27	1	1000000164
391.915	380.121	6030.49	1	1000000165
418.53	384.078	6029.45	1	1000000166
405.86	391.972	6029.7	1	1000000167
418.814	292.2	6031.9	1	1000000168
360.46	296.91	6031.53	1	1000000169
437.133	320.479	6031.7	1	1000000170
428.579	395.187	6031.56	1	1000000171
398.791	398.777	6032.65	1	1000000172
504.255	457.518	6031.86	1	1000000173
502.266	474.741	6032.11	1	1000000174
399.009	310.209	6034.08	1	1000000175
406.223	322.247	6033.96	1	1000000176
354.68	336.086	6035.46	1	1000000177
461.345	386.763	6034.16	1	1000000178
322.624	388.793	6034.26	1	1000000179
490.926	391.441	6035.52	1	1000000180
349.314	439.52	6035.29	1	1000000181
407.349	365.419	6035.91	1	1000000182
304.595	386.504	6035.76	1	1000000183
396.413	276.084	6039.27	1	1000000184
457.967	280.82	6038.56	1	1000000185
403.193	375.129	6037.94	1	1000000186
456.106	377.942	6039.99	1	1000000187
314.365	379.104	6039.8	1	1000000188
345.066	383.841	6038.61	1	1000000189
425.147	390.17	6038.99	1	1000000190
149.245	51.545	6040.63	1	1000000191
53.1137	71.1344	6041.84	1	1000000192
93.8082	109.699	6040.19	1	1000000193
196.161	200.967	6040.27	1	1000000194
138.496	202.882	6041.45	1	1000000195
155.474	210.077	6041.12	1	1000000196
248.909	210.937	6040.82	1	1000000197
95.1606	220.478	6042.1	1	1000000198
12.0932	250.732	6040.14	1	1000000199
107.606	26.3995	6042.67	1	1000000200
60.8766	49.2988	6044.49	1	1000000201
249.726	98.5867	6043.75	1	1000000202
205.077	190.187	6043.79	1	1000000203
187.798	5.35274	6044.79	1	1000000204
204.127	56.0961	6045.94	1	1000000205
15.7494	133.308	6046	1	1000000206
110.799	137.365	6046.12	1	1000000207
18.2865	171.503	6045.51	1	1000000208
127.012	207.919	6046.07	1	1000000209
89.0269	246.907	6045.35	1	1000000210
103.376	11.6267	6047.82	1	1000000211
12.5532	55.8749	6047.89	1	1000000212
79.9665	93.4486	6046.83	1	1000000213
21.7334	146.456	6047.01	1	1000000214
238.822	158.839	6047.49	1	1000000215
35.6924	173.391	6047.92	1	1000000216
141.874	218.804	6048.53	1	1000000217
176.218	248.631	6047.46	1	1000000218
57.2281	60.7632	6050.65	1	1000000219
173.357	76.5168	6050.11	1	1000000220
121.79	142.653	6050.95	1	1000000221
95.7896	168.456	6049.45	1	1000000222
113.726	231.441	6050.64	1	1000000223
48.7716	250.743	6049.98	1	1000000224
141.909	44.13	6052.75	1	1000000225
168.934	97.6183	6051.29	1	1000000226
69.9533	105.231	6052.54	1	1000000227
61.7629	156.95	6051.47	1	1000000228
226.29	172.627	6051.79	1	1000000229
58.5448	190.925	6051.65	1	1000000230
207.018	222.143	6052.09	1	1000000231
61.195	225.213	6051.95	1	1000000232
78.2785	237.093	6051.67	1	1000000233
63.7502	242.043	6051.17	1	1000000234
78.4847	249.91	6051.84	1	1000000235
128.589	253.193	6054.16	1	1000000236
61.4807	6.60358	6057.25	1	1000000237
60.6944	28.5332	6056.27	1	1000000238
87.5852	35.5845	6056.81	1	1000000239
176.54	38.2158	6058.91	1	1000000240
223.818	125.609	6058.21	1	1000000241
107.184	192.793	6057.76	1	1000000242
197.783	217.73	6057.9	1	1000000243
207.003	11.2822	6061.91	1	1000000244
176.178	199.469	6060.19	1	1000000245
145.441	133.48	6062.93	1	1000000246
205.584	238.875	6064.08	1	1000000247
191.094	249.081	6062.85	1	1000000248
156.068	83.3853	6064.37	1	1000000249
193.759	197.024	6065.33	1	1000000250
493.658	120.42	6041.82	1	1000000251
386.329	145.29	6041.73	1	1000000252
506.94	38.6993	6042.92	1	1000000253
462.737	125.207	6044.09	1	1000000254
330.428	187.691	6043.25	1	1000000255
267.038	240.989	6044.41	1	1000000256
270.65	54.985	6046.08	1	1000000257
296.3	131.161	6045.86	1	1000000258
276.008	137.609	6045.19	1	1000000259
402.802	165.122	6045.76	1	1000000260
458.331	162.068	6048.3	1	1000000261
481.587	169.618	6047.14	1	1000000262
439.021	176.871	6048.69	1	1000000263
306.31	193.013	6047.1	1	1000000264
378.379	36.5256	6052.82	1	1000000265
433.446	40.4474	6052.88	1	1000000266
502.266	136.587	6052.16	1	1000000267
374.959	213.05	6052.73	1	1000000268
483.045	19.406	6054.45	1	1000000269
318.928	180.672	6055.03	1	1000000270
317.096	82.1144	6056.55	1	1000000271
382.255	98.8584	6056.95	1	1000000272
397.972	12.49	6058.51	1	1000000273
280.804	158.311	6058.75	1	1000000274
425.687	173.436	6058.16	1	1000000275
403.768	238.202	6059.09	1	1000000276
261.847	114.504	6060.87	1	1000000277
284.327	119.84	6061.13	1	1000000278
296.35	237.816	6060.73	1	1000000279
345.585	38.3157	6062.22	1	1000000280
278.973	145.044	6063.48	1	1000000281
423.684	144.803	6063.12	1	1000000282
462.916	182.281	6063.16	1	1000000283
471.198	214.796	6063.99	1	1000000284
407.542	-5.96046e-08	6065.04	1	1000000285
403.428	113.465	6065.53	1	1000000286
483.27	178.764	6064.56	1	1000000287
347.448	247.383	6067.5	1	1000000288
327.904	182.946	6069.41	1	1000000289
354.034	81.39	6074.2	1	1000000290
499.184	151.024	6074.2	1	1000000291
77.8917	327.838	6041.03	1	1000000292
7.34088	400.797	6041.83	1	1000000293
87.4217	417.048	6040.47	1	1000000294
126.603	450.911	6041.54	1	1000000295
88.2619	346.12	6043.18	1	1000000296
190.963	350.43	6042.31	1	1000000297
188.196	413.335	6043.12	1	1000000298
19.0678	448.669	6043.94	1	1000000299
6.81134	452.174	6043.44	1	1000000300
47.7296	468.768	6044.02	1	1000000301
99.79	254.991	6045.88	1	1000000302
159.955	268.193	6044.51	1	1000000303
42.9372	303.946	6045.88	1	1000000304
220.41	325.26	6045.29	1	1000000305
239.778	328.885	6045.28	1	1000000306
107.521	370.566	6045.31	1	1000000307
152.6	379.71	6046.2	1	1000000308
104.806	382.196	6045.94	1	1000000309
34.3573	441.894	6046.25	1	1000000310
6.10238	257.016	6047.33	1	1000000311
22.595	282.463	6047.23	1	1000000312
150.854	256.514	6049.63	1	1000000313
82.5306	269.607	6051.83	1	1000000314
58.6791	286.033	6049.63	1	1000000315
101.328	351.723	6050.88	1	1000000316
91.3936	358.049	6050.97	1	1000000317
251.078	411.421	6050.4	1	1000000318
51.2392	425.602	6048.94	1	1000000319
68.3299	471.95	6049.24	1	1000000320
87.6018	471.009	6049.08	1	1000000321
239.026	265.553	6051.84	1	1000000322
129.649	290.367	6052.76	1	1000000323
107.994	324.769	6051.83	1	1000000324
97.0976	329.402	6051.95	1	1000000325
133.017	346.519	6052.2	1	1000000326
107.718	408.517	6051.82	1	1000000327
110.973	467.306	6051.97	1	1000000328
219.937	488.419	6052.07	1	1000000329
143.173	491.73	6053.07	1	1000000330
120.822	270.798	6053.97	1	1000000331
144.824	334.759	6055.23	1	1000000332
144.555	375.805	6054.24	1	1000000333
103.123	397.619	6054.07	1	1000000334
79.4041	398.734	6053.72	1	1000000335
93.5422	409.216	6053.53	1	1000000336
128.457	412.724	6054.43	1	1000000337
149.979	412.897	6055.35	1	1000000338
170.404	442.408	6055.09	1	1000000339
150.676	280.999	6055.83	1	1000000340
132.179	303.573	6057.05	1	1000000341
226.04	311.854	6057.32	1	1000000342
148.038	348.952	6056.4	1	1000000343
172.422	320.91	6057.83	1	1000000344
165.593	341.154	6059.86	1	1000000345
163.818	364.173	6058.61	1	1000000346
171.9	407.363	6058.38	1	1000000347
209.092	439.182	6058.3	1	1000000348
201.031	272.2	6061.89	1	1000000349
189.486	327.931	6061.47	1	1000000350
179.625	340.982	6061.13	1	1000000351
207.332	363.884	6061.59	1	1000000352
188.552	369.102	6060.64	1	1000000353
214.966	389.523	6060.37	1	1000000354
221.107	427.607	6060.72	1	1000000355
190.323	382.738	6062.92	1	1000000356
233.174	386.354	6062.25	1	1000000357
176.295	391.794	6063.3	1	1000000358
223.441	392.96	6063.54	1	1000000359
200.659	417.493	6062.19	1	1000000360
237.037	322.822	6066.37	1	1000000361
235.029	346.379	6065.54	1	1000000362
250.865	369.298	6066.56	1	1000000363
407.664	308.772	6041.87	1	1000000364
385.605	395.094	6041.71	1	1000000365
356.522	413.095	6040.59	1	1000000366
453.723	451.004	6041.54	1	1000000367
266.028	454.883	6041.03	1	1000000368
265.732	269.21	6042.88	1	1000000369
452.768	348.026	6042.85	1	1000000370
467.657	359.894	6044.1	1	1000000371
449.713	364.285	6042.96	1	1000000372
312.192	426.592	6043.42	1	1000000373
272.307	445.593	6044.06	1	1000000374
286.508	282.144	6046.25	1	1000000375
333.467	331.948	6046.44	1	1000000376
353.767	334.447	6045.8	1	1000000377
506.94	397.635	6044.68	1	1000000378
297.359	435.229	6045.25	1	1000000379
421.215	454.591	6046.18	1	1000000380
433.044	463.9	6046.03	1	1000000381
336.143	466.955	6046.43	1	1000000382
258.823	337.293	6047.49	1	1000000383
438.579	356.048	6047.15	1	1000000384
473.862	381.572	6048.58	1	1000000385
334.168	401.431	6048	1	1000000386
477.272	402.111	6047.74	1	1000000387
333.532	486.938	6046.78	1	1000000388
471.172	305.666	6050.56	1	1000000389
292.041	335.943	6049.17	1	1000000390
502.094	335.69	6049.86	1	1000000391
328.456	342.549	6049.39	1	1000000392
303.212	346.587	6049.92	1	1000000393
314.198	354.216	6049.15	1	1000000394
448.686	278.044	6051.88	1	1000000395
300.714	300.511	6052.22	1	1000000396
368.354	371.931	6052.54	1	1000000397
388.582	438.156	6052.15	1	1000000398
285.475	310.623	6055.37	1	1000000399
260.323	312.927	6054.86	1	1000000400
270.802	331.561	6054.86	1	1000000401
389.829	396.648	6054.9	1	1000000402
371.868	423.786	6054.4	1	1000000403
391.078	345.5	6056.03	1	1000000404
493.566	367.613	6055.79	1	1000000405
260.711	407.181	6056.77	1	1000000406
285.674	406.855	6056.44	1	1000000407
390.375	412.357	6057.66	1	1000000408
435.045	435.959	6056.63	1	1000000409
389.81	324.108	6058.49	1	1000000410
376.954	345.052	6059.4	1	1000000411
345.944	356.317	6059.06	1	1000000412
362.308	389.566	6058.66	1	1000000413
380.326	419.451	6058.81	1	1000000414
487.83	435.681	6059.26	1	1000000415
348.718	458.827	6059.52	1	1000000416
366.61	277.999	6062.04	1	1000000417
473.33	314.555	6061.03	1	1000000418
356.216	324.967	6061.15	1	1000000419
291.842	327.446	6060.22	1	1000000420
338.749	327.296	6061.87	1	1000000421
304.736	257.284	6062.61	1	1000000422
372.884	385.668	6062.95	1	1000000423
268.292	387.855	6062.64	1	1000000424
347.218	280.31	6065.9	1	1000000425
337.483	406.791	6066.47	1	1000000426
360.493	269.159	6066.57	1	1000000427
284.913	342.059	6069.14	1	1000000428
258.574	311.522	6072.33	1	1000000429
273.753	311.614	6072.07	1	1000000430
297.717	317.196	6072.3	1	1000000431
270.259	298.213	6074.2	1	1000000432
105.249	176.286	6014.67	2	1000000000
103.71	24.2583	6018.84	2	1000000001
33.2281	157.187	6018.98	2	1000000005
85.2	64.268	6022.02	2	1000000004
49.0028	251.45	6020.67	2	1000000002
111.605	11.3538	6024.64	2	1000000006
32.647	61.1592	6023.73	2	1000000003
145.276	63.8272	6024.2	2	1000000007
53.9078	172.105	6023.73	2	1000000008
250.468	186.895	6024.3	2	1000000433
251.421	64.7681	6026.28	2	1000000060
18.6087	116.611	6026.43	2	1000000012
119.908	39.7485	6027.07	2	1000000009
151.502	49.1432	6028.39	2	1000000010
107.114	82.8605	6027.03	2	1000000011
194.403	168.513	6028.15	2	1000000016
186.684	157.593	6030.58	2	1000000013
67.8866	170.581	6029.47	2	1000000015
149.931	39.291	6032.84	2	1000000017
160.181	169.323	6031.85	2	1000000014
131.641	177.108	6033.13	2	1000000018
142.559	183.808	6031.54	2	1000000019
173.199	227.746	6032.04	2	1000000023
212.017	53.1644	6034.01	2	1000000021
64.9169	84.8602	6033.75	2	1000000022
88.149	113.805	6036.28	2	1000000193
208.664	166.482	6034.02	2	1000000025
220.618	173.403	6033.64	2	1000000026
243.018	3.28707	6036.85	2	1000000028
65.8766	15.848	6037.62	2	1000000020
94.6885	118.783	6035.88	2	1000000031
172.333	121.134	6037.13	2	1000000024
149.234	122.593	6036.67	2	1000000032
240.414	181.496	6035.88	2	1000000027
101.159	29.3908	6039.99	2	1000000200
110.526	79.1519	6039.59	2	1000000030
152.326	213.349	6039.85	2	1000000196
222.962	246.827	6038.22	2	1000000033
487.572	38.3361	6014.71	2	1000000034
449.356	17.8397	6017.34	2	1000000037
438.859	49.6142	6016.68	2	1000000035
347.542	72.8091	6017.03	2	1000000036
300.162	14.309	6019.61	2	1000000039
405.522	95.0665	6018.93	2	1000000038
479.839	24.6892	6021.51	2	1000000050
255.843	26.5277	6021.97	2	1000000049
450.036	47.0521	6021.91	2	1000000042
499.21	53.3309	6021.26	2	1000000040
289.729	66.0082	6021.73	2	1000000043
393.951	85.0576	6020.82	2	1000000041
338.969	87.985	6021.5	2	1000000052
355.953	135.818	6021.8	2	1000000045
403.832	150.617	6021.91	2	1000000056
501.562	157.939	6020.73	2	1000000048
486.49	85.9624	6022.9	2	1000000051
472.808	91.3233	6022.59	2	1000000044
338.217	94.554	6023.81	2	1000000063
330.904	107.215	6023.41	2	1000000053
290.53	131.778	6022.97	2	1000000054
475.482	134.964	6023.23	2	1000000055
310.209	136.737	6024.66	2	1000000046
385.082	158.223	6024.52	2	1000000057
502.722	180.219	6024.51	2	1000000068
396.842	15.3544	6026.63	2	1000000058
412.807	74.9936	6025.17	2	1000000061
502.435	80.6475	6026.05	2	1000000071
450.134	146.419	6026.55	2	1000000065
484.166	148.724	6024.97	2	1000000047
480.789	164.485	6026.14	2	1000000066
488.954	181.854	6026.66	2	1000000067
423.497	185.169	6025.44	2	1000000075
491.354	232.161	6025.6	2	1000000069
294.39	52.0311	6027.39	2	1000000059
338.395	69.2306	6027.97	2	1000000070
309.799	89.2248	6029	2	1000000062
433.162	112.572	6027.07	2	1000000064
392.761	120.003	6028.6	2	1000000086
355.279	122.789	6027.65	2	1000000072
360.093	163.845	6029.02	2	1000000081
443.567	171.12	6027.74	2	1000000434
317.156	180.333	6028.58	2	1000000082
486.614	194.118	6027.54	2	1000000077
413.808	18.64	6030.54	2	1000000078
472.314	99.6122	6029.33	2	1000000079
414.702	156.54	6029.42	2	1000000073
496.096	166.393	6029.24	2	1000000074
279.682	196.022	6031.04	2	1000000076
417.87	195.837	6030.72	2	1000000091
457.685	208.628	6029.97	2	1000000097
457.199	221.44	6030.2	2	1000000083
393.344	240.948	6030.92	2	1000000093
439.841	242.333	6030.42	2	1000000094
403.137	248.501	6031.17	2	1000000084
370.941	123.849	6032.16	2	1000000095
451.519	133.86	6032.51	2	1000000080
274.99	143.307	6031.91	2	1000000096
494.507	150.88	6032.34	2	1000000087
400.327	157.567	6032.99	2	1000000088
360.871	180.906	6031.58	2	1000000089
388.05	182.859	6032.94	2	1000000090
372.569	240.247	6032.62	2	1000000092
442.958	251.301	6032.9	2	1000000099
481.294	250.522	6033.31	2	1000000100
349.804	48.2708	6034.13	2	1000000085
334.064	232.841	6033.88	2	1000000111
277.374	251.034	6033.69	2	1000000098
320.154	43.0298	6035.88	2	1000000101
506.94	43.0391	6036.45	2	1000000253
306.554	48.3094	6039.11	2	1000000104
363.703	49.9876	6038.08	2	1000000105
283.025	102.503	6039.65	2	1000000106
418.504	107.639	6038.43	2	1000000102
354.075	127.248	6039.44	2	1000000107
376.075	136.648	6039.64	2	1000000108
273.124	183.267	6038.26	2	1000000109
376.312	205.348	6038.65	2	1000000110
61.7425	399.293	6023.52	2	1000000114
94.1867	307.245	6026.67	2	1000000115
208.664	393.974	6025.43	2	1000000113
106.2	280.919	6027.86	2	1000000118
148.425	296.525	6027.49	2	1000000119
154.375	337.82	6028.94	2	1000000121
208.028	364.924	6028.38	2	1000000116
81.0609	413.856	6028.64	2	1000000130
145.233	427.085	6029.01	2	1000000131
84.1996	495.782	6028.4	2	1000000123
139.452	273.727	6029.21	2	1000000117
154.16	311.786	6029.13	2	1000000124
122.08	314.859	6030.55	2	1000000125
178.786	319.915	6030.16	2	1000000126
141.741	327.926	6030.28	2	1000000120
107.885	418.001	6029.62	2	1000000122
99.2783	352.009	6031.44	2	1000000127
203.601	365.205	6032.39	2	1000000128
226.206	401.721	6032.25	2	1000000129
213.153	419.602	6032.48	2	1000000135
78.796	433.258	6032.78	2	1000000132
94.2475	458.661	6032.85	2	1000000133
174.639	292.748	6035.25	2	1000000136
59.0109	304.515	6033.53	2	1000000137
244.436	320.65	6034.14	2	1000000138
108.113	356.712	6033.89	2	1000000435
186.44	363.534	6034.51	2	1000000134
47.9074	400.964	6034.89	2	1000000146
160.979	414.978	6034.43	2	1000000139
122.256	435.486	6034.88	2	1000000140
176.363	468.968	6033.67	2	1000000141
137.361	493.004	6033.83	2	1000000142
141.208	292.846	6037.75	2	1000000147
234.36	293.221	6037.42	2	1000000143
216.254	397.474	6036.23	2	1000000145
175.749	439.697	6037.54	2	1000000151
251.422	255.704	6039.66	2	1000000112
71.0573	329.33	6039.48	2	1000000292
91.7959	432.723	6038.75	2	1000000150
440.485	341.35	6022.28	2	1000000152
481.073	309.036	6024.59	2	1000000153
370.279	261.254	6026.51	2	1000000154
506.94	307.648	6026.64	2	1000000155
506.94	319.305	6026.8	2	1000000158
482.428	449.146	6026.2	2	1000000156
387.821	325.278	6028.45	2	1000000159
360.085	336.414	6028.03	2	1000000164
431.267	371.545	6027.98	2	1000000160
448.492	398.319	6028.39	2	1000000161
253.682	278.603	6031.07	2	1000000163
417.417	296.596	6031.21	2	1000000168
464.545	295.978	6029.89	2	1000000157
388.845	383.631	6029.92	2	1000000165
418.189	386.833	6029.96	2	1000000166
406.18	397.004	6029.82	2	1000000167
476.019	412.512	6030.59	2	1000000162
358.464	299.761	6032.12	2	1000000169
430.461	324.714	6032.15	2	1000000170
429.775	342.55	6032.72	2	1000000436
394.861	400.33	6031.59	2	1000000172
426.552	399.972	6032.26	2	1000000171
502.652	461.297	6033.1	2	1000000173
501.36	476.892	6031.93	2	1000000174
420.387	287.896	6034.54	2	1000000437
396.671	313.664	6034.47	2	1000000175
403.522	328.515	6033.79	2	1000000176
356.056	340.068	6034.67	2	1000000177
404.961	368.303	6033.79	2	1000000182
300.289	389.833	6034.55	2	1000000183
458.404	389.359	6033.89	2	1000000178
343.673	385.866	6036.9	2	1000000189
487.456	394.045	6036.29	2	1000000180
345.771	444.036	6036.29	2	1000000181
456.493	281.806	6039.29	2	1000000185
309.987	379.879	6038.45	2	1000000188
399.916	378.95	6038.85	2	1000000186
451.784	381.764	6039.65	2	1000000187
318.892	392.289	6039.23	2	1000000179
384.054	398.188	6038.75	2	1000000365
453.258	453.569	6040.02	2	1000000367
263.832	456.576	6039.8	2	1000000368
55.1179	6.08536	6041.11	2	1000000029
53.9689	52.9677	6042.1	2	1000000201
143.43	53.9226	6041.24	2	1000000191
47.6879	73.6942	6041.77	2	1000000192
75.8843	97.6122	6042.25	2	1000000213
191.226	203.818	6040.91	2	1000000194
136.098	206.554	6041.79	2	1000000195
90.5587	224.311	6040.55	2	1000000198
42.9614	242.162	6040.61	2	1000000438
184.199	6.29614	6044.18	2	1000000204
245.914	101.09	6043.66	2	1000000202
235.134	162.434	6044.26	2	1000000215
200.244	192.732	6043.97	2	1000000203
123.67	211.27	6043.13	2	1000000209
243.623	212.739	6043.6	2	1000000197
200.516	57.8104	6046.04	2	1000000205
11.3842	61.5751	6046.05	2	1000000212
166.102	80.9734	6044.58	2	1000000220
13.9558	135.666	6045.73	2	1000000206
107.765	141.59	6045.72	2	1000000207
21.5647	148.461	6046.27	2	1000000214
16.3003	173.786	6045.27	2	1000000208
138.672	220.995	6046.58	2	1000000217
56.4813	228.674	6046.16	2	1000000439
84.3278	247.768	6046.3	2	1000000210
39.5186	1.22475	6047.16	2	1000000440
163.935	100.88	6047.76	2	1000000226
93.9488	157.222	6047.69	2	1000000441
34.2564	175.738	6047.71	2	1000000216
87.3941	174.221	6046.91	2	1000000222
224.366	174.392	6048.63	2	1000000229
172.491	250.419	6048.53	2	1000000218
97.2729	13.1435	6050.3	2	1000000211
55.2191	65.7594	6050.26	2	1000000219
123.11	76.0292	6049.91	2	1000000442
116.888	145.662	6049.24	2	1000000221
61.1098	159.138	6050.99	2	1000000228
55.4279	194.144	6049.87	2	1000000230
76.4507	238.476	6050.39	2	1000000233
46.5562	253.03	6049.7	2	1000000224
68.6143	109.247	6052.18	2	1000000227
59.4912	227.381	6051.73	2	1000000232
111.596	235.147	6051.39	2	1000000223
61.1057	243.744	6051.73	2	1000000234
140.399	52.0566	6053.67	2	1000000225
205.271	229.132	6054.28	2	1000000231
60.1751	11.4199	6056.44	2	1000000237
59.5373	34.6239	6056.32	2	1000000238
81.9968	35.7594	6055.74	2	1000000239
84.479	55.2055	6057.32	2	1000000443
220.588	127.711	6055.66	2	1000000241
104.289	196.788	6057.21	2	1000000242
172.02	41.1062	6058.56	2	1000000240
193.431	217.429	6058.74	2	1000000243
202.601	9.93857	6061.07	2	1000000244
173.666	203.731	6062.1	2	1000000245
154.192	87.3715	6062.96	2	1000000249
141.706	137.782	6062.68	2	1000000246
189.399	252.248	6063.37	2	1000000248
191.481	199.612	6065.86	2	1000000250
202.774	240.172	6065.01	2	1000000247
382.632	146.153	6041.46	2	1000000252
329.41	188.147	6041.26	2	1000000255
490.323	125.288	6043.71	2	1000000251
265.624	57.1141	6044.82	2	1000000257
458.311	127.419	6044.64	2	1000000254
290.204	131.539	6046.45	2	1000000258
400.41	167.899	6045.12	2	1000000260
303.552	195.509	6045.97	2	1000000264
271.942	139.734	6046.92	2	1000000259
454.064	166.463	6047.85	2	1000000261
477.34	171.168	6048.22	2	1000000262
262.546	243.714	6047.13	2	1000000256
432.018	180.262	6050.67	2	1000000263
376.395	38.8575	6052.96	2	1000000265
499.929	137.195	6052.59	2	1000000267
315.376	180.994	6051.84	2	1000000270
428.463	44.4625	6053.53	2	1000000266
314.409	84.7111	6054.59	2	1000000271
372	213.518	6054.91	2	1000000268
394.948	16.4959	6057.26	2	1000000273
480.508	22.6771	6055.94	2	1000000269
380.23	100.964	6057.52	2	1000000272
401.054	240.333	6057.43	2	1000000276
422.886	173.16	6059.2	2	1000000275
278.684	120.666	6060.91	2	1000000278
276.704	160.289	6061.93	2	1000000274
292.077	241.594	6061.61	2	1000000279
401.714	-5.96046e-08	6062.68	2	1000000285
257.857	119.414	6063.07	2	1000000277
479.714	180.815	6063.14	2	1000000287
459.469	184.754	6063.41	2	1000000283
469.943	216.814	6064.18	2	1000000284
270.919	146.804	6065.28	2	1000000281
420.139	146.427	6064.63	2	1000000282
341.949	39.5062	6066.54	2	1000000280
498.093	153.094	6068.46	2	1000000291
325.917	186.342	6069.36	2	1000000289
341.582	252.868	6068.78	2	1000000288
396.626	115.103	6071.27	2	1000000286
349.662	85.1163	6074.2	2	1000000290
-5.96046e-08	358.317	6040.33	2	1000000149
247.868	381.854	6040.15	2	1000000144
6.06919	402.351	6041.23	2	1000000293
85.5517	419.882	6041.1	2	1000000294
125.6	455.323	6040.92	2	1000000295
89.079	349.895	6043.3	2	1000000296
187.796	351.477	6043.86	2	1000000297
186.794	415.284	6043.66	2	1000000298
17.4527	450.884	6043.32	2	1000000299
4.87087	453.866	6042.79	2	1000000300
44.4646	470.837	6043.99	2	1000000301
95.1502	259.459	6045.66	2	1000000302
157.747	272.455	6045.97	2	1000000303
20.8052	284.235	6046.47	2	1000000312
40.9423	305.292	6045.77	2	1000000304
153.08	311.761	6045.04	2	1000000148
216.876	328.45	6045.77	2	1000000305
239.436	329.698	6045.54	2	1000000306
105.412	371.238	6046.7	2	1000000307
21.4797	441.499	6045.16	2	1000000444
33.1563	443.818	6046.4	2	1000000310
159.497	477.701	6044.56	2	1000000445
5.50585	258.18	6046.9	2	1000000311
100.009	383.126	6047.8	2	1000000309
149.556	383.944	6046.8	2	1000000308
51.4797	426.492	6047.96	2	1000000319
148.396	262.571	6049.78	2	1000000313
57.7397	288.493	6050.09	2	1000000315
99.309	353.35	6050.75	2	1000000316
91.038	359.533	6050.44	2	1000000317
86.6495	471.899	6050.22	2	1000000321
65.7698	472.733	6050.1	2	1000000320
230.851	269.339	6051.16	2	1000000322
81.258	271.429	6052.99	2	1000000314
106.606	326.932	6051.85	2	1000000324
96.2309	330.946	6051.55	2	1000000325
132.029	347.714	6052.76	2	1000000326
78.8284	400.578	6051.7	2	1000000335
106.473	409.793	6051.61	2	1000000327
249.402	412.825	6051.64	2	1000000318
216.372	488.405	6051.78	2	1000000329
222.546	313.053	6053.9	2	1000000342
144.553	336.135	6055.26	2	1000000332
143.573	376.667	6054.27	2	1000000333
102.959	399.71	6054.57	2	1000000334
92.0813	410.832	6053.78	2	1000000336
126.47	414.424	6053.86	2	1000000337
149.122	415.101	6055.46	2	1000000338
110.032	468.108	6053.78	2	1000000328
142.123	494.501	6054.3	2	1000000330
125.17	255.898	6056.51	2	1000000236
117.99	273.05	6055.96	2	1000000331
150.57	282.976	6055.7	2	1000000340
125.746	294.132	6055.62	2	1000000323
131.215	306.761	6056.23	2	1000000341
172.294	322.777	6057.34	2	1000000344
147.26	350.153	6057.6	2	1000000343
168.881	444.093	6057.22	2	1000000339
164.282	363.929	6057.77	2	1000000346
214.589	391.992	6059.21	2	1000000354
208.463	442.693	6059.5	2	1000000348
188.816	330.416	6060.96	2	1000000350
163.163	343.677	6060.43	2	1000000345
206.108	364.978	6061.43	2	1000000352
187.14	370.605	6062.02	2	1000000353
190.992	383.871	6061.06	2	1000000356
232.304	388.019	6061.43	2	1000000357
222.676	395.785	6062.09	2	1000000359
201.443	419.293	6060.97	2	1000000360
220.625	431.026	6061.43	2	1000000355
200.047	274.672	6062.44	2	1000000349
178.696	343.157	6062.5	2	1000000351
234.087	348.068	6063.65	2	1000000362
174.437	393.677	6062.88	2	1000000358
236.463	327.726	6064.77	2	1000000361
251.012	371.054	6066.38	2	1000000363
392.082	284.527	6040.76	2	1000000184
404.749	310.001	6040.96	2	1000000364
342.302	387.607	6042.28	2	1000000446
420.642	396.427	6040.61	2	1000000190
352.872	412.943	6042.28	2	1000000366
262.483	272.14	6043.81	2	1000000369
451.961	348.629	6042.63	2	1000000370
464.637	362.866	6044.16	2	1000000371
447.546	366.287	6042.37	2	1000000372
505.674	401.071	6043.97	2	1000000378
307.432	429.312	6043.29	2	1000000373
295.595	436.814	6043.74	2	1000000379
332.164	336.129	6046.02	2	1000000376
353.315	336.102	6045.5	2	1000000377
257.646	339.923	6045.92	2	1000000383
270.358	444.263	6044.5	2	1000000374
333.831	470.712	6044.81	2	1000000382
282.905	286.869	6046.83	2	1000000375
313.114	356.028	6047.03	2	1000000394
435.263	357.451	6047.29	2	1000000384
471.819	384.577	6047.34	2	1000000385
476.347	405.434	6047.58	2	1000000387
418.184	456.15	6047.65	2	1000000380
430.034	466.649	6048.3	2	1000000381
469.898	307.468	6050.18	2	1000000389
289.892	338.466	6049.75	2	1000000390
327.767	348.196	6050.42	2	1000000392
300.292	350.89	6049.46	2	1000000393
331.101	403.539	6048.97	2	1000000386
330.416	490.662	6049.1	2	1000000388
296.771	304.184	6051.97	2	1000000396
255.93	317.631	6052.25	2	1000000400
296.567	329.507	6052.9	2	1000000447
498.824	337.034	6052.07	2	1000000391
365.722	373.023	6052.57	2	1000000397
385.022	440.38	6051.97	2	1000000398
281.325	312.605	6053.46	2	1000000399
270.831	337.245	6054.47	2	1000000401
492.929	368.834	6055.42	2	1000000405
388.563	398.677	6055.19	2	1000000402
279.771	409.394	6055.06	2	1000000407
369.384	425.536	6055.06	2	1000000403
506.94	271.49	6056.84	2	1000000448
389.407	349.715	6056	2	1000000404
341.939	358.213	6057.54	2	1000000412
258.044	408.06	6055.93	2	1000000406
379.529	421.748	6057.64	2	1000000414
432.124	439.674	6057.66	2	1000000409
367.434	282.619	6059.29	2	1000000417
389.409	330.164	6059.57	2	1000000410
374.366	347.039	6058.64	2	1000000411
267.876	388.66	6058.71	2	1000000424
360.238	392.402	6059.37	2	1000000413
389.197	414.35	6059.06	2	1000000408
487.741	437.998	6059.38	2	1000000415
345.524	460.131	6058.27	2	1000000416
467.885	317.053	6061.04	2	1000000418
288.686	328.831	6061.93	2	1000000420
372.423	387.251	6061.39	2	1000000423
302.12	261.192	6063.73	2	1000000422
352.3	328.073	6063.43	2	1000000419
336.489	329.661	6063.31	2	1000000421
506.94	272.449	6065.16	2	1000000449
356.574	273.342	6066.77	2	1000000427
340.13	284.492	6066.67	2	1000000425
283.572	343.965	6068.29	2	1000000428
335.385	409.824	6067.28	2	1000000426
257.589	313.975	6070.3	2	1000000429
296.122	319.973	6070.61	2	1000000431
271.36	314.022	6071.54	2	1000000430
269.3	300.89	6074.2	2	1000000432
101.851	178.799	6015.48	3	1000000000
99.5962	27.9161	6018.47	3	1000000001
106.791	10.1649	6021.85	3	1000000006
30.1006	158.512	6020.78	3	1000000005
230.938	-5.96046e-08	6024.02	3	1000000450
252.787	30.0204	6023.08	3	1000000049
33.5533	65.9948	6023.77	3	1000000003
84.9291	65.897	6023.05	3	1000000004
143.016	66.2061	6023.5	3	1000000007
53.0807	174.841	6024.11	3	1000000008
245.477	189.186	6023.52	3	1000000433
120.798	41.4984	6026.37	3	1000000009
249.581	69.1166	6025.36	3	1000000060
103.917	86.8324	6026.65	3	1000000011
14.0644	118.323	6028.35	3	1000000012
184.862	159.063	6027.84	3	1000000013
189.105	167.084	6027.56	3	1000000016
67.6503	172.304	6028.69	3	1000000015
145.384	51.529	6029.7	3	1000000010
157.277	173.013	6029.83	3	1000000014
218.664	177.356	6031.26	3	1000000026
139.44	186.734	6031.26	3	1000000019
170.142	231.707	6030.2	3	1000000023
212.989	56.003	6032.93	3	1000000021
85.475	114.742	6031.91	3	1000000193
205.341	166.336	6032.78	3	1000000025
128.419	180.872	6032.76	3	1000000018
243.142	5.17772	6034.85	3	1000000028
143.981	42.0105	6034.38	3	1000000017
64.2545	87.2039	6035.33	3	1000000022
236.548	184.311	6035.06	3	1000000027
92.7831	121.542	6037.06	3	1000000031
171.139	122.017	6037.81	3	1000000024
147.206	126.802	6036.05	3	1000000032
217.29	249.995	6037.37	3	1000000033
96.4327	32.9724	6039.48	3	1000000200
53.2957	54.0639	6038.03	3	1000000201
107.187	85.4677	6039.28	3	1000000030
151.103	213.659	6038.97	3	1000000196
89.1215	224.801	6038.17	3	1000000198
42.0324	249.383	6038.22	3	1000000438
6.57541	250.291	6039.06	3	1000000199
487.309	41.3783	6015.21	3	1000000034
346.403	76.0787	6017.03	3	1000000036
445.546	18.9876	6019.46	3	1000000037
433.36	51.526	6018.83	3	1000000035
403.76	95.1405	6019.61	3	1000000038
296.817	17.3935	6020.7	3	1000000039
476.821	25.998	6021.86	3	1000000050
447.341	47.9063	6021.38	3	1000000042
499.085	56.3144	6021.74	3	1000000040
390.248	86.7137	6021.78	3	1000000041
484.767	87.8223	6021.15	3	1000000051
337.011	88.662	6022.03	3	1000000052
470.623	91.2801	6022.28	3	1000000044
355.865	137.42	6022.11	3	1000000045
497.827	160.577	6022.26	3	1000000048
287.555	68.6755	6024.36	3	1000000043
411.572	78.8672	6024.06	3	1000000061
290.643	129.363	6024.56	3	1000000054
476.14	136.384	6023.99	3	1000000055
401.073	151.856	6022.69	3	1000000056
502.768	83.3004	6026.13	3	1000000071
336.408	97.1019	6025.36	3	1000000063
331.701	105.434	6025.31	3	1000000053
478.295	149.984	6024.73	3	1000000047
474.864	167.33	6026.37	3	1000000066
311.679	180.49	6025.97	3	1000000082
497.729	182.411	6025.35	3	1000000068
422.616	186.833	6025.69	3	1000000075
488.263	235.898	6026.33	3	1000000069
395.283	15.3761	6027.39	3	1000000058
337.263	70.789	6027.97	3	1000000070
307.897	92.0667	6029.1	3	1000000062
471.532	103.756	6028.03	3	1000000079
431.451	114.171	6027.29	3	1000000064
306.511	134.641	6028.47	3	1000000046
447.322	147.187	6026.98	3	1000000065
384.512	156.865	6027.16	3	1000000057
441.112	171.46	6028.02	3	1000000434
482.37	182.768	6027.58	3	1000000067
488.072	194.994	6027.34	3	1000000077
476.249	198.077	6028.31	3	1000000451
412.164	20.6917	6031.03	3	1000000078
294.158	53.3256	6030.62	3	1000000059
390.775	123.628	6029.43	3	1000000086
353.987	127.037	6029.14	3	1000000072
409.776	158.279	6029.5	3	1000000073
357.751	166.73	6029.31	3	1000000081
492.371	170.801	6029.39	3	1000000074
359.337	182.953	6030.61	3	1000000089
413.46	196.859	6029.63	3	1000000091
455.808	210.188	6029.36	3	1000000097
434.279	246.214	6030.27	3	1000000094
318.074	41.8595	6033.34	3	1000000101
366.816	125.323	6032.31	3	1000000095
449.249	135.181	6032.84	3	1000000080
268.436	145.175	6032.82	3	1000000096
490.193	153.439	6032.45	3	1000000452
396.18	157.329	6033.16	3	1000000088
452.372	222.367	6032.2	3	1000000083
332.35	239.916	6031.66	3	1000000111
389.629	243.248	6032.88	3	1000000093
506.94	44.7159	6035.27	3	1000000253
346.093	50.7914	6033.6	3	1000000085
385.435	180.969	6034.23	3	1000000090
277.778	198.743	6034.83	3	1000000076
370.663	242.439	6033.89	3	1000000092
401.661	249.93	6035.11	3	1000000084
479.901	252.368	6034.28	3	1000000100
361.128	53.2215	6036.91	3	1000000105
282.501	104.651	6036.84	3	1000000106
403.667	168.535	6036.44	3	1000000103
302.577	50.7507	6038.55	3	1000000104
413.492	111.073	6039.43	3	1000000102
348.645	127.55	6039.87	3	1000000107
373.804	137.918	6039.23	3	1000000108
381.054	148.171	6039.04	3	1000000252
506.94	159.097	6038.54	3	1000000453
331.112	189.154	6038.48	3	1000000255
374.931	207.254	6038.54	3	1000000110
49.3622	253.512	6019.78	3	1000000002
92.4416	310.738	6024.57	3	1000000115
61.5533	400.906	6024.05	3	1000000114
145.08	299.113	6026.86	3	1000000454
208.71	394.868	6025.3	3	1000000113
137.185	274.565	6027.4	3	1000000117
102.285	282.205	6028.06	3	1000000118
150.783	341.556	6027.42	3	1000000121
80.2841	417.769	6028.18	3	1000000130
82.8836	497.526	6026.99	3	1000000123
155.048	313.956	6029.45	3	1000000124
123.481	316.513	6030.12	3	1000000125
175.023	321.381	6029.58	3	1000000126
140.272	329.866	6029.67	3	1000000120
108.115	360.333	6030.78	3	1000000435
204.81	362.287	6029.58	3	1000000116
206.965	367.667	6031.16	3	1000000128
105.023	418.733	6030.6	3	1000000122
147.418	427.965	6030.26	3	1000000131
249.158	282.721	6031.32	3	1000000163
94.8985	356.413	6032.86	3	1000000127
225.054	402.166	6032.33	3	1000000129
210.883	419.231	6032.9	3	1000000135
78.3701	435.596	6032.12	3	1000000132
94.5982	458.751	6032.16	3	1000000133
172.51	292.633	6035.11	3	1000000136
56.8158	303.988	6034.76	3	1000000137
243.336	324.03	6034.67	3	1000000138
186.274	365.868	6035.44	3	1000000134
44.3392	402.701	6034.44	3	1000000146
162.327	413.471	6034.81	3	1000000139
121.287	438.955	6035.01	3	1000000140
176.212	469.934	6034.52	3	1000000141
135.35	493.601	6034.73	3	1000000142
137.155	294.339	6036.32	3	1000000147
233.113	296.896	6036.57	3	1000000143
188.066	356.387	6039.11	3	1000000297
214.166	398.72	6037.16	3	1000000145
173.276	441.442	6037.3	3	1000000151
248.401	258.346	6040.49	3	1000000112
64.9901	326.979	6039.69	3	1000000292
-5.96046e-08	359.478	6038.53	3	1000000149
89.6622	435.166	6038.71	3	1000000150
124.782	458.167	6039.54	3	1000000295
440.701	343.318	6022.41	3	1000000152
480.402	310.075	6024.53	3	1000000153
506.94	323.913	6026.78	3	1000000158
485.043	445.545	6025.68	3	1000000156
370.061	265.577	6028.71	3	1000000154
506.94	309.468	6027.72	3	1000000155
387.087	325.701	6028.04	3	1000000159
432.143	373.477	6026.97	3	1000000160
418.173	389.693	6028.67	3	1000000166
451.297	402.442	6027.54	3	1000000161
462.875	297.651	6029.84	3	1000000157
415.896	300.211	6030.86	3	1000000168
361.889	334.942	6030.06	3	1000000164
388.494	386.189	6029.76	3	1000000165
426.463	403.047	6030.18	3	1000000171
476.547	416.325	6029.21	3	1000000162
501.083	478.644	6030.53	3	1000000174
427.329	329.19	6031.95	3	1000000170
426.94	347.044	6032.62	3	1000000436
404.385	369.629	6032.31	3	1000000182
458.918	391.511	6033.12	3	1000000178
408.896	400.242	6031.5	3	1000000167
393.177	401.577	6032.03	3	1000000172
501.64	463.942	6032.32	3	1000000173
439.131	256.366	6033.73	3	1000000099
418.292	289.246	6034.73	3	1000000437
356.96	301.016	6033.58	3	1000000169
394.592	316.023	6035.42	3	1000000175
401.698	331.464	6034.02	3	1000000176
356.74	345.692	6034.52	3	1000000177
342.121	386.233	6034.61	3	1000000189
295.947	394.486	6034.4	3	1000000183
486.458	394.406	6034.78	3	1000000180
273.451	253.656	6036.5	3	1000000098
457.182	282.729	6036.18	3	1000000185
450.53	384.661	6036.4	3	1000000187
383.931	401.182	6037.27	3	1000000365
346.988	447.547	6037.26	3	1000000181
451.433	348.71	6039.67	3	1000000370
308.463	378.313	6038.2	3	1000000188
398.304	381.41	6039.54	3	1000000186
312.911	396.277	6038.31	3	1000000179
260.882	456.91	6039.84	3	1000000368
55.3537	6.54241	6041.72	3	1000000029
141.739	55.7323	6041.68	3	1000000191
45.4802	71.0777	6042.13	3	1000000192
161.351	82.477	6041.06	3	1000000220
196.463	194.683	6041.16	3	1000000203
186.476	204.839	6041.64	3	1000000194
134.272	208.397	6040.72	3	1000000195
120.789	213.896	6041.1	3	1000000209
180.956	2.51507	6044.3	3	1000000204
65.9392	16.0722	6043.55	3	1000000020
197.713	60.4848	6044.12	3	1000000205
75.0814	101.359	6043.46	3	1000000213
231.084	163.921	6043.3	3	1000000215
239.34	216.77	6042.36	3	1000000197
56.0029	227.241	6043.46	3	1000000439
40.0598	-5.96046e-08	6045.69	3	1000000440
163.305	103.373	6045.97	3	1000000226
13.6303	138.708	6045.21	3	1000000206
104.268	145.078	6045.49	3	1000000207
21.4983	149.816	6046.24	3	1000000214
91.5128	158.52	6045.17	3	1000000441
16.2502	175.311	6044.93	3	1000000208
35.3333	176.763	6046.53	3	1000000216
135.217	224.53	6046.63	3	1000000217
80.8233	249.671	6045.18	3	1000000210
98.1038	14.6848	6048.01	3	1000000211
11.9923	63.2217	6048.15	3	1000000212
243.007	102.986	6047.03	3	1000000202
221.191	175.777	6047.86	3	1000000229
81.8326	180.601	6047.88	3	1000000222
171.727	252.447	6048.55	3	1000000218
115.46	149.184	6049.41	3	1000000221
55.5379	196.917	6050.24	3	1000000230
75.9054	241.277	6050.18	3	1000000233
107.371	239.717	6050.58	3	1000000223
55.212	66.7863	6051.92	3	1000000219
123.454	80.7984	6051.53	3	1000000442
70.0231	111.561	6052.99	3	1000000227
220.099	128.628	6051.19	3	1000000241
61.723	160.985	6051.73	3	1000000228
61.2955	246.723	6051.47	3	1000000234
75.8147	252.584	6051.73	3	1000000235
60.828	35.3239	6054.61	3	1000000238
85.8415	55.2367	6054.66	3	1000000443
60.6796	230.422	6053.47	3	1000000232
84.1264	38.9202	6056.26	3	1000000239
168.345	40.12	6057.43	3	1000000240
104.252	199.676	6056.96	3	1000000242
203.096	231.466	6056.37	3	1000000231
192.403	217.183	6058.67	3	1000000243
201.786	7.86764	6062.87	3	1000000244
154.837	88.5895	6063.87	3	1000000249
141.072	140.894	6063.67	3	1000000246
173.228	206.784	6064.38	3	1000000245
191.245	202.338	6067.19	3	1000000250
203.419	241.556	6067.63	3	1000000247
271.414	185.743	6040.74	3	1000000109
262.241	56.2209	6046.7	3	1000000257
454.713	129.25	6045.48	3	1000000254
485.539	130.213	6045.92	3	1000000251
398.065	170.215	6045.27	3	1000000260
303.193	196.288	6045.96	3	1000000264
270.676	144.269	6048.27	3	1000000259
452.174	169.446	6047.57	3	1000000261
262.16	247.267	6047.84	3	1000000256
285.987	132.969	6049.39	3	1000000258
312.273	180.679	6049.97	3	1000000270
430.196	182.773	6050.58	3	1000000263
480.74	24.4333	6051.9	3	1000000269
425.054	45.9846	6052.03	3	1000000266
310.014	87.5969	6051.82	3	1000000271
499.159	139.535	6051.88	3	1000000267
474.472	173.357	6051.14	3	1000000262
378.079	40.3495	6054.36	3	1000000265
371.543	215.461	6054.78	3	1000000268
299.864	248.81	6054.6	3	1000000455
394.921	-5.96046e-08	6059.46	3	1000000285
394.01	17.5246	6059.12	3	1000000273
378.005	103.578	6059.81	3	1000000272
420.294	173.636	6058.95	3	1000000275
397.917	244.305	6059	3	1000000276
276.904	121.444	6060.44	3	1000000278
277.139	162.618	6061.83	3	1000000274
477.086	183.098	6061.73	3	1000000287
287.287	243.483	6060.61	3	1000000279
258.992	120.956	6064.16	3	1000000277
470.798	217.703	6063.08	3	1000000284
418.139	148.949	6065.72	3	1000000282
497.639	154.495	6065.14	3	1000000291
456.837	188.463	6065.38	3	1000000283
341.315	41.7595	6067.96	3	1000000280
325.864	188.98	6068.07	3	1000000289
264.247	146.005	6069.6	3	1000000281
276.108	150.211	6070.65	3	1000000456
392.161	116.579	6072.37	3	1000000286
347.17	86.0507	6074.2	3	1000000290
4.90323	404.364	6041.32	3	1000000293
84.0659	421.75	6040.84	3	1000000294
42.351	472.011	6040.52	3	1000000301
91.4596	261.048	6043.27	3	1000000302
89.9936	352.563	6042.93	3	1000000296
244.894	385.38	6042.75	3	1000000144
186.329	417.742	6043.62	3	1000000298
20.9198	443.944	6043.49	3	1000000444
16.7424	453.762	6043.76	3	1000000299
2.80289	456.964	6043.22	3	1000000300
157.361	476.505	6044.1	3	1000000445
20.0883	286.721	6046.32	3	1000000312
40.2795	307.374	6045.6	3	1000000304
239.819	331.422	6045.12	3	1000000306
104.012	371.778	6045.65	3	1000000307
32.8817	445.234	6045.9	3	1000000310
125.492	470.639	6045.18	3	1000000457
67.9305	473.069	6046.69	3	1000000320
7.04008	260.087	6048.14	3	1000000311
155.472	274.886	6047.32	3	1000000303
153.207	313.371	6047.06	3	1000000148
213.72	331.333	6047.62	3	1000000305
98.9081	384.259	6047.54	3	1000000309
148.917	386.842	6047.08	3	1000000308
49.3798	421.561	6048.8	3	1000000319
46.0189	255.964	6050.65	3	1000000224
224.85	270.892	6050.77	3	1000000322
80.9892	273.001	6049.97	3	1000000314
58.2341	291.197	6050.26	3	1000000315
97.8321	355.665	6050.51	3	1000000316
90.2505	362.168	6050.04	3	1000000317
247.225	412.834	6051.01	3	1000000318
86.2822	471.487	6050.27	3	1000000321
214.629	489.35	6050.46	3	1000000329
217.597	313.902	6052.91	3	1000000342
107.391	328.674	6051.94	3	1000000324
96.3598	332.317	6051.76	3	1000000325
78.3746	402.324	6051.71	3	1000000335
106.409	410.862	6051.7	3	1000000327
91.5405	412.7	6052.17	3	1000000336
109.258	470.23	6051.71	3	1000000328
132.487	309.581	6054.65	3	1000000341
132.765	351.432	6054.32	3	1000000326
143.793	378.056	6054.61	3	1000000333
103.915	401.503	6053.48	3	1000000334
125.955	416.074	6054.71	3	1000000337
141.651	495.093	6054.73	3	1000000330
117.493	275.123	6055.68	3	1000000331
148.635	286.14	6056.88	3	1000000340
125.944	297.651	6056.34	3	1000000323
172.347	326.651	6057.58	3	1000000344
145.675	338.118	6056.12	3	1000000332
147.578	352.144	6056.74	3	1000000343
170.594	410.05	6055.57	3	1000000347
149.191	416.722	6056.49	3	1000000338
168.752	444.376	6057.64	3	1000000339
124.916	258.247	6058.01	3	1000000236
179.25	344.681	6059.8	3	1000000351
164.376	365.82	6057.77	3	1000000346
208.161	444.799	6059.82	3	1000000348
188.619	331.597	6061.14	3	1000000350
162.778	345.763	6060.21	3	1000000345
204.672	367.074	6061.32	3	1000000352
186.915	372.414	6061.91	3	1000000353
191.385	385.5	6061.1	3	1000000356
232.921	390.208	6061.99	3	1000000357
213.187	393.18	6060.62	3	1000000354
201.183	420.92	6061.46	3	1000000360
201.376	276.403	6062.23	3	1000000349
233.948	350.364	6062.68	3	1000000362
223.218	397.872	6063.63	3	1000000359
219.914	434.076	6062.36	3	1000000355
189.815	255.051	6064.46	3	1000000248
173.833	395.784	6064.88	3	1000000358
235.176	327.713	6067.51	3	1000000361
250.775	372.848	6067.38	3	1000000363
463.225	366.476	6041.89	3	1000000371
445.774	367.118	6040.15	3	1000000372
418.463	396.836	6041.06	3	1000000190
451.367	458.616	6041.38	3	1000000367
390.269	288.391	6043.79	3	1000000184
351.59	415.615	6042.31	3	1000000366
305.561	429.373	6043.56	3	1000000373
295.709	437.585	6043.47	3	1000000379
260.743	273.827	6045.76	3	1000000369
280.89	289.97	6045.69	3	1000000375
332.592	336.056	6044.85	3	1000000376
354.562	337.112	6045.66	3	1000000377
340.237	391.13	6045.36	3	1000000446
505.694	404.186	6044.77	3	1000000378
475.197	408.131	6045.26	3	1000000387
269.189	445.974	6045.93	3	1000000374
430.549	467.334	6046.11	3	1000000381
331.604	473.458	6045.43	3	1000000382
468.59	309.144	6048	3	1000000389
255.802	343.973	6046.97	3	1000000383
325.58	348.353	6048.53	3	1000000392
298.629	352.333	6048.51	3	1000000393
312.595	357.437	6047.54	3	1000000394
434.739	357.807	6048.56	3	1000000384
471.599	387.083	6047.18	3	1000000385
330.165	405.29	6048.61	3	1000000386
417.535	457.623	6047.98	3	1000000380
331.188	492.097	6048.52	3	1000000388
506.94	271.669	6050	3	1000000448
287.743	339.687	6048.96	3	1000000390
293.823	306.722	6052.38	3	1000000396
279.567	313.274	6051.88	3	1000000399
254.095	321.233	6051.82	3	1000000400
271.443	339.449	6052.2	3	1000000401
365.424	373.608	6053.14	3	1000000397
384.354	442.69	6052.76	3	1000000398
445.414	283.786	6055.38	3	1000000395
296.258	330.809	6053.58	3	1000000447
497.881	338.838	6054.25	3	1000000391
389.396	351.723	6054.93	3	1000000404
492.36	370.578	6054.53	3	1000000405
386.732	398.412	6054.6	3	1000000402
367.283	426.794	6053.51	3	1000000403
267.911	387.287	6056.98	3	1000000424
255.597	407.879	6056.02	3	1000000406
275.866	409.921	6057.2	3	1000000407
381.596	424.489	6055.71	3	1000000414
432.753	439.399	6057.45	3	1000000409
345.08	461.653	6056.06	3	1000000416
340.181	357.109	6058.08	3	1000000412
358.328	394.547	6059.31	3	1000000413
388.709	417.931	6059.04	3	1000000408
488.355	438.744	6058.65	3	1000000415
368.372	285.758	6061.15	3	1000000417
466.459	318.779	6060.17	3	1000000418
389.501	332.505	6061.49	3	1000000410
373.571	349.915	6060.45	3	1000000411
287.995	328.15	6063.52	3	1000000420
337.617	331.603	6062.14	3	1000000421
351.974	331.499	6063.24	3	1000000419
372.044	390.056	6062.6	3	1000000423
300.32	263.405	6065.93	3	1000000422
506.94	269.205	6065.26	3	1000000449
355.261	275.977	6066.06	3	1000000427
336.852	288.136	6066.72	3	1000000425
335.425	410.687	6067.13	3	1000000426
340.617	258.739	6068.89	3	1000000288
258.122	317.082	6070.08	3	1000000429
282.906	347.259	6069.97	3	1000000428
272.147	316.596	6072.93	3	1000000430
296.299	322.055	6070.94	3	1000000431
269.48	302.955	6074.2	3	1000000432
101.51	180.417	6016.21	4	1000000000
104.677	7.78199	6019.93	4	1000000006
99.0138	29.3698	6018.64	4	1000000001
48.3545	253.274	6019.49	4	1000000002
37.082	67.9617	6022.12	4	1000000003
28.0616	158.788	6021.33	4	1000000005
245.443	189.518	6021.77	4	1000000433
228.886	-5.96046e-08	6024.1	4	1000000450
250.206	34.6611	6024.19	4	1000000049
89.764	68.5923	6023.47	4	1000000004
122.07	42.1901	6026.75	4	1000000009
141.238	69.4677	6025.2	4	1000000007
101.54	94.5494	6025.5	4	1000000011
53.5448	176.171	6024.93	4	1000000008
248.859	72.6919	6026.98	4	1000000060
182.782	158.893	6027.27	4	1000000013
186.209	166.377	6027.89	4	1000000016
153.005	179.12	6029.08	4	1000000014
168.444	235.656	6028.93	4	1000000023
143.442	52.2401	6031.26	4	1000000010
84.5301	115.067	6030.55	4	1000000193
13.789	119.874	6029.14	4	1000000012
65.6625	173.402	6029.28	4	1000000015
134.705	189.659	6030.12	4	1000000019
212.486	58.9953	6033.33	4	1000000021
239.507	5.12555	6035.58	4	1000000028
75.8747	90.827	6033.94	4	1000000458
90.5981	125.332	6033.92	4	1000000031
143.467	126.366	6035.02	4	1000000032
125.125	186.267	6033.58	4	1000000018
214.839	252.185	6034.26	4	1000000033
141.91	42.212	6037.28	4	1000000017
51.5203	56.1391	6037.18	4	1000000201
63.5068	87.1267	6036.47	4	1000000022
200.026	166.249	6036.41	4	1000000025
215.414	181.682	6036.51	4	1000000026
87.327	225.423	6036.88	4	1000000198
94.8354	34.6074	6038.7	4	1000000200
106.813	91.2115	6038.96	4	1000000030
168.468	122.232	6039.79	4	1000000024
234.365	191.08	6039.66	4	1000000027
191.049	196.392	6039.26	4	1000000203
149.176	215.404	6039.22	4	1000000196
5.36272	253.118	6038.77	4	1000000199
486.671	44.9111	6015.07	4	1000000034
445.23	20.3842	6017.23	4	1000000037
431.482	52.8293	6017.69	4	1000000035
345.919	78.7624	6016.34	4	1000000036
482.89	89.3962	6019.41	4	1000000051
401.362	96.7641	6019.36	4	1000000038
295.462	18.4947	6020.72	4	1000000039
475.533	27.1615	6021.36	4	1000000050
447.119	49.1525	6020.7	4	1000000042
498.684	59.0339	6021.89	4	1000000040
387.995	87.9471	6021.93	4	1000000041
335.534	92.8825	6022.18	4	1000000052
469.247	93.1909	6021.38	4	1000000044
291.89	126.084	6021.63	4	1000000054
288.454	71.38	6024.51	4	1000000043
410.77	80.8395	6024.42	4	1000000061
355.812	138.589	6022.72	4	1000000045
397.652	153.4	6022.68	4	1000000056
494.768	163.982	6022.56	4	1000000048
306.979	178.43	6023.2	4	1000000082
501.03	84.4532	6025.64	4	1000000071
471.529	106.234	6026.47	4	1000000079
430.099	114.932	6026.08	4	1000000064
307.526	131.171	6026.06	4	1000000046
478.999	137.8	6025.24	4	1000000055
473.157	151.882	6025.25	4	1000000047
471.786	169.45	6026.72	4	1000000066
476.718	184.153	6026.67	4	1000000067
495.638	185.31	6025.4	4	1000000068
419.39	189.364	6025.83	4	1000000075
473.164	199.842	6026.76	4	1000000451
485.625	239.128	6026.53	4	1000000069
392.627	15.0163	6028.91	4	1000000058
335.534	75.0684	6028.63	4	1000000070
305.701	97.3536	6028.23	4	1000000062
331.018	107.811	6027.71	4	1000000053
387.43	125.354	6027.34	4	1000000086
442.857	147.319	6026.94	4	1000000065
383.626	156.935	6027.28	4	1000000057
489.136	156.194	6028.96	4	1000000452
405.602	158.671	6028.19	4	1000000073
437.967	173.383	6027.43	4	1000000434
334.326	96.2601	6029.39	4	1000000063
506.94	123.137	6029.63	4	1000000459
351.689	131.069	6029.53	4	1000000072
353.294	170.007	6029.71	4	1000000081
489.027	175.029	6029.71	4	1000000074
357.593	185.096	6029.75	4	1000000089
488.809	197.742	6029.44	4	1000000077
410.687	198.483	6029.99	4	1000000091
453.398	212.147	6029.17	4	1000000097
327.882	243.906	6030.11	4	1000000111
431.08	249.412	6030.56	4	1000000094
412.879	21.8059	6031.36	4	1000000078
314.073	40.6067	6031.35	4	1000000101
506.94	43.928	6031.48	4	1000000253
344.588	50.4795	6032.98	4	1000000085
291.843	54.7124	6031.91	4	1000000059
362.312	128.773	6031.96	4	1000000095
444.938	135.811	6031.72	4	1000000080
265.783	147.441	6032.19	4	1000000096
370.77	243.612	6032.19	4	1000000092
387.539	246.87	6031.73	4	1000000093
397.428	248.377	6032.54	4	1000000084
479.091	252.934	6032.77	4	1000000100
394.908	157.577	6035.29	4	1000000088
490.294	158.604	6035.28	4	1000000087
384.339	180.814	6035.41	4	1000000090
331.745	191.582	6034.95	4	1000000255
448.602	224.279	6034.68	4	1000000083
302.98	51.6206	6037.23	4	1000000104
361.149	54.4707	6037.02	4	1000000105
280.466	105.265	6035.78	4	1000000106
383.587	129.767	6036.6	4	1000000460
403.437	170.465	6036.32	4	1000000103
276.337	201.374	6036.51	4	1000000076
407.497	111.115	6039.8	4	1000000102
378.601	151.724	6038.78	4	1000000252
372.72	209.919	6039.3	4	1000000110
90.8135	310.901	6023.54	4	1000000115
139.747	300.225	6025.97	4	1000000119
148.015	343.161	6026.32	4	1000000121
208.681	394.64	6026.01	4	1000000113
61.9536	400.31	6025.64	4	1000000114
80.2897	498.065	6025.95	4	1000000123
81.876	420.25	6027.14	4	1000000130
134.731	278.669	6029.12	4	1000000117
103.277	283.602	6029.75	4	1000000118
246.667	284.843	6031.01	4	1000000163
125.387	316.448	6030.78	4	1000000125
175.861	323.039	6029.3	4	1000000126
138.897	328.551	6029.56	4	1000000120
151.711	356.419	6029.95	4	1000000461
111.352	359.355	6029.88	4	1000000435
204.041	360.112	6030.37	4	1000000116
103.874	419.308	6030.69	4	1000000122
148.669	428.309	6029.85	4	1000000131
174.39	444.834	6030.32	4	1000000462
207.654	369.965	6032.38	4	1000000128
221.425	401.634	6033.27	4	1000000129
42.3921	403.654	6032.52	4	1000000146
208.654	418.979	6033.1	4	1000000135
76.0694	435.573	6032.4	4	1000000132
93.4275	464.319	6032.04	4	1000000133
57.254	303.869	6034.57	4	1000000137
241.835	323.927	6035.41	4	1000000138
92.5026	357.998	6033.63	4	1000000127
192.437	363.86	6035.45	4	1000000297
186.645	367.711	6034.9	4	1000000134
162.458	413.647	6034.81	4	1000000139
119.428	441.754	6034.29	4	1000000140
177.601	468.811	6034.38	4	1000000141
135.195	493.798	6035.23	4	1000000142
174.046	292.543	6036.16	4	1000000136
134.944	294.199	6036.92	4	1000000147
229.794	296.995	6036.15	4	1000000143
87.9875	437.253	6037.75	4	1000000150
63.9151	325.828	6039.5	4	1000000292
-5.96046e-08	359.042	6038.38	4	1000000149
209.552	399.13	6038.93	4	1000000145
168.165	442.497	6038.13	4	1000000151
125.156	460.069	6039.36	4	1000000295
39.5632	474.262	6039.68	4	1000000301
440.271	345.823	6023.03	4	1000000152
480.99	311.102	6025.37	4	1000000153
455.335	406.742	6026.42	4	1000000161
488.379	441.503	6025.19	4	1000000156
370.113	269.397	6028.55	4	1000000154
384.939	326	6028.67	4	1000000159
503.558	326.201	6028	4	1000000158
431.135	377.048	6027.87	4	1000000160
475.815	416.993	6029.1	4	1000000162
461.699	300.269	6030.46	4	1000000157
414.374	302.92	6030.46	4	1000000168
506.94	314.121	6029.29	4	1000000155
424.049	329.978	6030.5	4	1000000170
387.496	387.474	6030.83	4	1000000165
417.184	391.536	6029.32	4	1000000166
409.118	401.742	6031.25	4	1000000167
400.273	331.683	6033.22	4	1000000176
361.762	337.828	6032.99	4	1000000164
424.925	348.509	6031.48	4	1000000436
455.795	390.852	6033.09	4	1000000178
390.586	401.909	6032.9	4	1000000172
424.797	403.794	6032.42	4	1000000171
500.601	465.628	6032.68	4	1000000173
499.486	480.764	6032.1	4	1000000174
437.552	259.162	6033.87	4	1000000099
457.116	282.229	6035.43	4	1000000185
355.126	301.089	6035	4	1000000169
393.762	315.922	6035.67	4	1000000175
403.526	368.693	6035.27	4	1000000182
292.29	394.6	6034.8	4	1000000183
270.52	256.756	6036.67	4	1000000098
415.714	290.518	6036.36	4	1000000437
353.717	349.998	6035.71	4	1000000177
308.093	380.387	6037.02	4	1000000188
447.825	384.683	6037.27	4	1000000187
340.959	387.126	6036.27	4	1000000189
483.319	395.694	6036.76	4	1000000180
312.041	397.1	6037.77	4	1000000179
380.098	403.376	6039.1	4	1000000365
345.916	449.858	6038.33	4	1000000181
257.964	458.581	6039.17	4	1000000368
152.651	83.1352	6041.07	4	1000000220
43.899	142.504	6041.77	4	1000000463
224.804	164.037	6041.48	4	1000000215
183.153	206.448	6041.18	4	1000000194
133.165	210.652	6040.3	4	1000000195
120.674	214.999	6041.44	4	1000000209
75.2867	103.208	6043.85	4	1000000213
237.284	216.613	6042.62	4	1000000197
54.9029	225.982	6043.42	4	1000000439
79.5357	251.075	6043.22	4	1000000210
55.231	4.51946	6045.55	4	1000000029
138.566	56.1893	6044.57	4	1000000191
197.17	61.9658	6044.83	4	1000000205
43.1259	65.9326	6045.13	4	1000000192
162.551	105.598	6046.21	4	1000000226
14.0864	139.887	6045.27	4	1000000206
103.166	146.822	6045.71	4	1000000207
89.9284	159.349	6045.38	4	1000000441
79.882	185.402	6046.03	4	1000000222
40.9676	-5.96046e-08	6048.18	4	1000000440
179.874	2.74238	6047.34	4	1000000204
65.3918	14.4247	6047.37	4	1000000020
98.7973	14.1274	6047.08	4	1000000211
13.2069	64.006	6047.61	4	1000000212
241.419	103.313	6048.58	4	1000000202
22.5764	151.533	6047.91	4	1000000214
17.6314	174.549	6046.8	4	1000000208
36.1921	178.385	6048.01	4	1000000216
131.921	227.912	6047.83	4	1000000217
172.106	252.857	6047.7	4	1000000218
123.256	79.5845	6049.03	4	1000000442
220.658	128.896	6050.52	4	1000000241
115.775	148.538	6050.06	4	1000000221
220.181	177.248	6048.96	4	1000000229
55.453	199.619	6050.92	4	1000000230
102.864	245.131	6050.95	4	1000000223
57.4222	66.2718	6051.9	4	1000000219
63.7971	161.581	6051.18	4	1000000228
62.6183	230.892	6052	4	1000000232
76.4785	243.237	6052.02	4	1000000233
60.8171	248.281	6052.06	4	1000000234
63.7118	13.954	6053.34	4	1000000237
164.844	39.8941	6054.46	4	1000000240
145.915	61.0951	6055.26	4	1000000225
61.1747	37.7586	6056.65	4	1000000238
85.6471	57.8924	6056.82	4	1000000443
104.757	202.684	6056.81	4	1000000242
202.585	233.026	6055.83	4	1000000231
82.7298	35.6181	6059.65	4	1000000239
191.146	218.337	6058.78	4	1000000243
198.673	8.6718	6063.03	4	1000000244
141.578	142.707	6063.63	4	1000000246
174.369	209.437	6063.39	4	1000000245
155.655	89.6347	6065.83	4	1000000249
191.232	204.568	6067.3	4	1000000250
204.495	243.501	6068.26	4	1000000247
370.397	139.777	6040.93	4	1000000108
268.203	186.846	6042.2	4	1000000109
343.946	128.555	6042.54	4	1000000107
454.095	130.718	6044.46	4	1000000254
483.445	132.212	6044.32	4	1000000251
262.889	58.459	6044.57	4	1000000257
400.282	172.555	6046.62	4	1000000260
449.766	172.502	6048.28	4	1000000261
311.53	179.207	6047.78	4	1000000270
300.55	196.684	6048.09	4	1000000264
408.219	234.42	6047.45	4	1000000464
260.602	248.236	6047	4	1000000256
305.716	89.8786	6049.19	4	1000000271
282.756	133.818	6049.25	4	1000000258
267.662	146.827	6049.34	4	1000000259
428.043	185.266	6049.8	4	1000000263
380.496	40.5153	6052.95	4	1000000265
496.536	140.26	6052.3	4	1000000267
470.551	177.363	6052.07	4	1000000262
480.574	25.3278	6054	4	1000000269
423.325	47.9986	6054.59	4	1000000266
393.717	-5.96046e-08	6056.89	4	1000000285
506.94	115.068	6056.37	4	1000000465
279.815	164.738	6056.33	4	1000000274
368.775	218.507	6055.98	4	1000000268
391.609	20.4732	6058.08	4	1000000273
377.038	102.163	6059.6	4	1000000272
273.989	122.74	6057.75	4	1000000278
420.71	172.212	6059.07	4	1000000275
259.106	121.15	6062.03	4	1000000277
472.101	185.677	6061.1	4	1000000287
470.901	218.63	6061.92	4	1000000284
283.893	244.277	6061.24	4	1000000279
392.47	247.105	6061.39	4	1000000276
496.77	157.689	6065.42	4	1000000291
454.755	189.079	6065.04	4	1000000283
340.763	43.3267	6068.12	4	1000000280
415.318	152.659	6067.69	4	1000000282
262.946	145.073	6070.58	4	1000000281
276.954	153.629	6069.03	4	1000000456
322.08	190.095	6069.89	4	1000000289
344.767	86.9396	6074.2	4	1000000290
389.671	116.241	6074.2	4	1000000286
241.963	258.518	6040.67	4	1000000112
82.9901	422.188	6040.35	4	1000000294
89.3311	260.412	6042.66	4	1000000302
239.896	330.195	6043.27	4	1000000306
90.3462	353.272	6042.95	4	1000000296
244.445	384.996	6043.99	4	1000000144
5.82447	405.392	6042.33	4	1000000293
184.826	418.758	6042.5	4	1000000298
20.9452	444.927	6043.55	4	1000000444
16.4574	454.833	6043.91	4	1000000299
4.03445	457.164	6043.3	4	1000000300
156.734	475.026	6043.43	4	1000000445
21.2754	288.536	6046.27	4	1000000312
158.838	314.764	6046.25	4	1000000148
210.924	329.791	6046.49	4	1000000305
105.119	373.134	6045.58	4	1000000307
150.066	385.699	6046.68	4	1000000308
125.023	473.572	6046.14	4	1000000457
9.36346	261.03	6047.82	4	1000000311
153.473	279.278	6048.25	4	1000000303
41.8569	311.3	6047.41	4	1000000304
98.7207	385.545	6047.03	4	1000000309
245.991	414.451	6048.63	4	1000000318
48.3698	421.828	6048.64	4	1000000319
32.5985	446.906	6047.22	4	1000000310
68.0041	473.129	6048.65	4	1000000320
43.058	476.685	6047.14	4	1000000466
45.6933	257.69	6050.07	4	1000000224
145.056	268.001	6050.64	4	1000000313
81.1215	274.517	6050.15	4	1000000314
59.1896	293.24	6050.02	4	1000000315
98.1882	356.126	6050.49	4	1000000316
90.9513	362.558	6049.56	4	1000000317
79.8218	400.942	6050.28	4	1000000335
104.839	402.291	6050.81	4	1000000334
86.72	472.928	6050.61	4	1000000321
215.172	490.579	6050.44	4	1000000329
221.147	272.166	6051.8	4	1000000322
214.43	314.321	6053.18	4	1000000342
252.736	322.275	6051.59	4	1000000400
96.5517	332.068	6052.24	4	1000000325
88.091	348.188	6051.39	4	1000000467
106.759	410.159	6051.33	4	1000000327
91.7935	412.682	6052.64	4	1000000336
173.085	432.256	6052.04	4	1000000468
109.203	470.813	6053.19	4	1000000328
108.875	330.065	6053.6	4	1000000324
145.67	339.649	6055.46	4	1000000332
143.374	378.651	6053.75	4	1000000333
126.684	417.468	6055.48	4	1000000337
126.169	258.885	6057.08	4	1000000236
116.772	276.965	6056.14	4	1000000331
127.759	299.992	6056.73	4	1000000323
133.048	312.115	6055.97	4	1000000341
172.448	327.813	6056.93	4	1000000344
147.37	353.551	6056.04	4	1000000343
252.886	406.686	6055.68	4	1000000406
149.229	417.756	6057	4	1000000338
143.084	495.527	6056.18	4	1000000330
146.867	288.842	6057.74	4	1000000340
168.616	299.612	6058.23	4	1000000469
163.656	346.17	6059.42	4	1000000345
164.932	366.623	6057.85	4	1000000346
192.459	383.948	6058.99	4	1000000356
170.174	410.868	6058.22	4	1000000347
169.398	445.019	6059.52	4	1000000339
206.972	445.185	6059.4	4	1000000348
188.977	331.669	6060.89	4	1000000350
179.334	346.021	6061.56	4	1000000351
205.381	365.947	6060.91	4	1000000352
188.781	371.664	6060.72	4	1000000353
213.657	392.72	6061.66	4	1000000354
143.549	396.898	6060.91	4	1000000470
201.464	421.486	6061.48	4	1000000360
221.047	434.067	6061.19	4	1000000355
192.369	255.364	6063.46	4	1000000248
213.853	361.756	6063.58	4	1000000471
233.031	390.482	6063.04	4	1000000357
222.194	398.148	6062.12	4	1000000359
202.313	277.444	6064.94	4	1000000349
236.083	331.338	6064.85	4	1000000361
174.086	395.427	6065.64	4	1000000358
232.907	351.293	6067.05	4	1000000362
248.863	372.895	6067	4	1000000363
506.94	345.223	6041.09	4	1000000472
451.31	349.433	6040.9	4	1000000370
443.544	367.287	6040.78	4	1000000372
460.665	368.036	6041.73	4	1000000371
395.531	383.325	6041.25	4	1000000186
292.84	438.685	6041.62	4	1000000379
450.755	460.815	6041.19	4	1000000367
278.379	290.19	6043.31	4	1000000375
400.72	311.88	6042.96	4	1000000364
331.497	336.821	6043.91	4	1000000376
416.561	395.16	6042.56	4	1000000190
506.94	404.906	6044.2	4	1000000378
351.201	416.604	6042.56	4	1000000366
301.573	429.617	6043.2	4	1000000373
387.792	292.774	6045.11	4	1000000184
352.277	338.232	6045.65	4	1000000377
297.92	353.681	6046.68	4	1000000393
312.779	357.684	6046.04	4	1000000394
337.197	392.903	6045.5	4	1000000446
268.399	450.395	6045.21	4	1000000374
329.499	477.272	6045.71	4	1000000382
506.94	270.566	6048.38	4	1000000448
259.148	274.207	6046.97	4	1000000369
468.373	308.811	6047.49	4	1000000389
277.756	312.594	6047.97	4	1000000399
286.032	339.412	6048.15	4	1000000390
254.159	346.024	6046.73	4	1000000383
469.054	386.482	6047.33	4	1000000385
327.246	406.592	6047.8	4	1000000386
471.874	411.036	6047.83	4	1000000387
429.932	469.459	6047.01	4	1000000381
435.024	358.899	6049.35	4	1000000384
381.977	441.276	6050.85	4	1000000398
414.25	458.87	6050.74	4	1000000380
330.448	493.479	6049.38	4	1000000388
291.906	310.46	6051.21	4	1000000396
268.763	338.9	6052.3	4	1000000401
322.036	354.19	6052.26	4	1000000392
393.24	353.891	6052.13	4	1000000473
444.444	286.334	6054.5	4	1000000395
294.207	331.988	6053.74	4	1000000447
496.736	339.521	6054.72	4	1000000391
490.369	370.389	6053.54	4	1000000405
363.061	374.128	6054.48	4	1000000397
384.889	399.183	6054.51	4	1000000402
365.662	426.212	6054.04	4	1000000403
381.534	425.822	6056.55	4	1000000414
385.876	351.502	6055.8	4	1000000404
264.68	386.79	6056.94	4	1000000424
272.326	410.698	6056.99	4	1000000407
342.909	463.875	6057.46	4	1000000416
465.418	320.754	6059.69	4	1000000418
370.378	350.423	6059.04	4	1000000411
489.005	439.858	6059.17	4	1000000415
431.54	440.894	6059.09	4	1000000409
351.716	331.825	6061.93	4	1000000419
388.906	333.04	6061.81	4	1000000410
335.971	356.175	6060.87	4	1000000412
354.376	395.457	6061.79	4	1000000413
368.151	287.466	6064	4	1000000417
286.193	326.305	6062.94	4	1000000420
336.105	329.912	6062.94	4	1000000421
370.282	392.073	6062.62	4	1000000423
388.369	417.182	6063.38	4	1000000408
506.94	271.726	6066.04	4	1000000449
354.341	278.752	6064.96	4	1000000427
268.78	391.306	6065.41	4	1000000474
337.711	260.017	6067.08	4	1000000288
334.029	290.882	6067.28	4	1000000425
281.596	346.95	6068.06	4	1000000428
335.119	412.206	6066.73	4	1000000426
297.548	265.951	6068.95	4	1000000422
257.769	317.93	6070.32	4	1000000429
295.697	322.117	6070.75	4	1000000431
270.736	317.791	6071.64	4	1000000430
267.965	303.957	6074.2	4	1000000432
101.552	182.705	6014.35	5	1000000000
91.8629	29.6453	6017.79	5	1000000001
99.505	7.9977	6019.56	5	1000000006
34.6319	68.5931	6021.09	5	1000000003
31.3387	157.234	6018.57	5	1000000005
98.648	101.66	6021.22	5	1000000011
244.788	193.158	6021.23	5	1000000433
224.722	2.22378	6022.94	5	1000000450
241.838	40.6903	6023.57	5	1000000049
89.7269	73.3081	6023.01	5	1000000004
139.089	73.6916	6024.08	5	1000000007
52.6942	183.511	6024.13	5	1000000008
138.512	-5.96046e-08	6025.38	5	1000000475
120.272	46.2963	6026.27	5	1000000009
130.92	193.29	6026.87	5	1000000019
247.586	75.24	6027.23	5	1000000060
82.4286	114.45	6028.58	5	1000000193
184.602	159.404	6027.81	5	1000000013
167.459	243.47	6028.17	5	1000000023
182.537	166.247	6029.6	5	1000000016
62.6307	177.502	6030.84	5	1000000015
149.931	185.519	6029.67	5	1000000014
238.581	6.50537	6032.13	5	1000000028
60.9576	89.15	6032.71	5	1000000022
87.6872	127.1	6031.36	5	1000000031
140.666	127.421	6033.01	5	1000000032
123.535	188.734	6033.03	5	1000000018
137.032	55.5091	6033.82	5	1000000010
212.555	63.9183	6034.94	5	1000000021
72.9442	93.1871	6034.08	5	1000000458
176.803	37.5531	6036.19	5	1000000476
48.8005	62.194	6036.73	5	1000000201
218.135	166.867	6037.02	5	1000000215
84.5251	229.64	6036.89	5	1000000198
89.4218	38.9442	6039.69	5	1000000200
136.385	45.179	6038.47	5	1000000017
103.925	95.9318	6038.39	5	1000000030
194.826	168.806	6039.4	5	1000000025
211.616	185.129	6039.66	5	1000000026
185.577	200.039	6038.07	5	1000000203
443.901	23.6435	6016.65	5	1000000037
484.092	47.5589	6015.71	5	1000000034
343.873	82.0936	6015.58	5	1000000036
429.172	55.4534	6017.38	5	1000000035
481.256	91.794	6019.05	5	1000000051
398.746	98.1223	6019.34	5	1000000038
292.932	20.5255	6021.11	5	1000000039
473.171	29.5252	6022.06	5	1000000050
444.791	50.7331	6020.44	5	1000000042
407.573	81.3531	6021.49	5	1000000061
292.488	126.005	6021.14	5	1000000054
353.737	141.18	6022.04	5	1000000045
394.461	155.011	6022.48	5	1000000056
497.624	60.51	6023.49	5	1000000040
285.529	73.8773	6024.67	5	1000000043
384.309	89.8743	6023.51	5	1000000041
468.653	96.371	6022.97	5	1000000044
471.268	113.458	6024.23	5	1000000079
427.794	117.563	6024.33	5	1000000064
307.341	131.23	6024.11	5	1000000046
491.763	165.281	6023.55	5	1000000048
303.647	179.393	6023.24	5	1000000082
498.919	86.0277	6025.15	5	1000000071
328.657	95.7813	6024.97	5	1000000052
386.667	126.692	6026.7	5	1000000086
439.478	149.112	6025.14	5	1000000065
469.793	153.771	6025.63	5	1000000047
485.719	156.292	6026.57	5	1000000452
506.94	174.184	6025.64	5	1000000477
431.856	176.041	6026.25	5	1000000434
493.679	185.933	6025.37	5	1000000068
469.973	187.933	6026.78	5	1000000067
470.958	202.755	6025.46	5	1000000451
483.898	242.865	6026.52	5	1000000069
311.482	40.6733	6028.68	5	1000000101
304.241	101.995	6028.48	5	1000000062
330.226	117.367	6028.71	5	1000000053
501.381	127.592	6029.06	5	1000000459
480.646	142.383	6028.14	5	1000000055
264.033	152.239	6028.48	5	1000000096
380.762	159.421	6027.77	5	1000000057
467.977	167.764	6027.73	5	1000000066
351.376	168.237	6028.19	5	1000000081
351.589	189.011	6027.74	5	1000000089
414.085	193.532	6026.96	5	1000000075
449.58	215.315	6027.39	5	1000000097
389.44	15.3002	6030.06	5	1000000058
500.481	45.991	6029.16	5	1000000253
331.864	78.597	6029.47	5	1000000070
358.694	130.42	6030.75	5	1000000095
441.725	138.283	6031.25	5	1000000080
399.398	162.473	6029.24	5	1000000073
409.106	201.734	6030.32	5	1000000091
491.291	200.118	6029.75	5	1000000077
369.475	246.364	6030.64	5	1000000092
383.627	249.732	6031.19	5	1000000093
411.691	23.3908	6031.3	5	1000000078
341.744	52.1528	6031.9	5	1000000085
334.705	98.8239	6033.07	5	1000000063
347.571	133.26	6031.34	5	1000000072
487.743	178.887	6033.01	5	1000000074
332.062	193.185	6032.1	5	1000000255
446.249	227.423	6034.39	5	1000000083
325.565	248.85	6031.76	5	1000000111
397.449	250.059	6032.91	5	1000000084
506.94	58.9035	6036.73	5	1000000478
288.663	59.8651	6034.09	5	1000000059
391.904	158.637	6035.26	5	1000000088
300.063	54.5581	6036.07	5	1000000104
358.627	56.5377	6036.7	5	1000000105
281.725	107.755	6037.08	5	1000000106
380.913	132.253	6037.59	5	1000000460
376.175	156.493	6037.66	5	1000000252
487.337	162.039	6035.7	5	1000000087
382.641	183.512	6037.37	5	1000000090
275.92	204.094	6037.24	5	1000000076
369.176	212.691	6038.86	5	1000000110
45.7093	253.803	6020.29	5	1000000002
88.3153	312.916	6024.34	5	1000000115
77.9646	499.39	6024.28	5	1000000123
143.432	348.773	6026.9	5	1000000121
204.828	397.154	6026.27	5	1000000113
60.4746	404.378	6026.29	5	1000000114
146.438	293.951	6028.52	5	1000000454
134.963	304.729	6027.65	5	1000000119
79.068	423.186	6028.1	5	1000000130
129.701	283.432	6030.51	5	1000000117
100.484	288.018	6030.72	5	1000000118
155.841	318.784	6029.18	5	1000000124
173.359	326.353	6029.87	5	1000000126
138.5	333.798	6030.69	5	1000000120
153.673	357.347	6030.48	5	1000000461
148.179	432.875	6029.94	5	1000000131
171.56	447	6030.64	5	1000000462
90.9006	469.168	6031.29	5	1000000133
211.194	255.816	6032.57	5	1000000033
243.823	286.51	6032.22	5	1000000163
124.932	320.376	6032.12	5	1000000125
113.549	359.571	6032.7	5	1000000435
202.258	361.685	6031.9	5	1000000116
205.912	373.512	6031.96	5	1000000128
42.8763	407.934	6033.04	5	1000000146
161.08	418.246	6033.06	5	1000000139
204.385	420.788	6031.97	5	1000000135
102.911	422.962	6031.7	5	1000000122
74.1988	440.657	6033.02	5	1000000132
117.472	447.208	6032.69	5	1000000140
181.917	470.992	6032.08	5	1000000141
54.3738	305.227	6034.34	5	1000000137
90.2766	362.833	6033.94	5	1000000127
184.864	372.041	6035.03	5	1000000134
217.451	403.198	6034.17	5	1000000129
134.487	499.644	6034.44	5	1000000142
41.5562	256.613	6037.74	5	1000000438
171.001	293.892	6036.07	5	1000000136
-5.96046e-08	359.679	6037.79	5	1000000149
191.305	369.296	6036.38	5	1000000297
165.165	447.359	6037.34	5	1000000151
39.6735	477.871	6037.57	5	1000000301
5.62872	257.176	6038.91	5	1000000199
237.868	261.205	6039.06	5	1000000112
133.357	297.855	6038.91	5	1000000147
228.465	303.669	6039.19	5	1000000143
237.055	328.267	6038.4	5	1000000138
205.772	401.533	6038.11	5	1000000145
81.6871	425.987	6038.49	5	1000000294
86.5731	442.879	6038.6	5	1000000150
123.309	465.693	6038.67	5	1000000295
440.178	347.979	6023.37	5	1000000152
480.616	311.168	6025.44	5	1000000153
487.967	441.435	6026.07	5	1000000156
367.156	273.519	6028.83	5	1000000154
506.94	318.259	6028.85	5	1000000155
500.508	329.592	6028.07	5	1000000158
426.514	379.316	6028.91	5	1000000160
453.387	411.362	6027.3	5	1000000161
427.389	255.942	6029.65	5	1000000094
460.465	304.524	6031.09	5	1000000157
412.194	306.669	6030.58	5	1000000168
377.592	329.784	6029.31	5	1000000159
423.143	351.546	6030.85	5	1000000436
383.65	391.627	6030.8	5	1000000165
412.287	392.772	6030.12	5	1000000166
410.849	407.856	6031.02	5	1000000167
475.74	423.398	6030.58	5	1000000162
477.391	254.346	6033.41	5	1000000100
435.919	262.729	6032.83	5	1000000099
418.879	331.432	6031.65	5	1000000170
397.593	333.693	6031.96	5	1000000176
421.6	404.345	6032.85	5	1000000171
496.581	468.914	6032.69	5	1000000173
494.898	482.9	6031.96	5	1000000174
267.11	258.82	6035.57	5	1000000098
350.288	305.274	6035.3	5	1000000169
454.917	390.959	6034.01	5	1000000178
480.622	395.459	6035.56	5	1000000180
307.036	402.367	6035.29	5	1000000179
385.452	403.48	6033.63	5	1000000172
453.753	286.765	6036.92	5	1000000185
413.613	293.667	6036.19	5	1000000437
390.014	320.366	6036.24	5	1000000175
[truncated: 77,096 more rows]

## Sheet: embryo-1-Middle
Position
Position X	Position Y	Position Z	Time	TrackID
105.708	220.246	6008.14	1	1000000000
84.7258	223.975	6008.92	1	1000000001
99.0358	74.1948	6011.08	1	1000000002
127.061	51.2023	6013.16	1	1000000003
19.2179	39.7354	6015.63	1	1000000004
38.3887	246.679	6017.04	1	1000000005
134.992	23.7092	6018.83	1	1000000006
163.316	73.0859	6019.46	1	1000000007
198.611	144.08	6020.01	1	1000000008
206.624	21.7379	6024.5	1	1000000009
70.937	25.0268	6023.08	1	1000000010
115.939	138.841	6025.45	1	1000000011
90.6983	238.122	6024.12	1	1000000012
223.042	25.2689	6025.22	1	1000000013
179.3	54.9487	6025.82	1	1000000014
79.9915	57.0264	6024.96	1	1000000015
195.634	69.8342	6025.93	1	1000000016
204.674	86.2626	6025.73	1	1000000017
148.484	113.296	6026.16	1	1000000018
170.859	122.522	6025.11	1	1000000019
66.8787	148.61	6026.67	1	1000000020
105.721	92.5052	6028.55	1	1000000021
155.809	126.042	6027.36	1	1000000022
33.5681	197.403	6027.16	1	1000000023
221.515	202.505	6027.73	1	1000000024
238.305	210.805	6028.22	1	1000000025
122.054	216.482	6028.25	1	1000000026
176.466	11.9538	6030.13	1	1000000027
210.247	61.1389	6030.75	1	1000000028
229.012	148.024	6031.09	1	1000000029
224.876	103.754	6032.88	1	1000000030
248.755	105.763	6033.08	1	1000000031
229.24	135.083	6032.17	1	1000000032
185.482	142.958	6033.22	1	1000000033
234.814	157.183	6032.96	1	1000000034
248.59	178.095	6032.09	1	1000000035
196.787	196.653	6031.71	1	1000000036
484.454	81.4257	6009	1	1000000037
505.74	97.628	6010.96	1	1000000038
500.238	71.5592	6013.34	1	1000000039
493.936	164.523	6012.21	1	1000000040
506.94	79.5582	6015.53	1	1000000041
473.755	135.276	6014.24	1	1000000042
482.614	18.8715	6017.94	1	1000000043
498.02	137.143	6016.97	1	1000000044
471.236	161.942	6016.88	1	1000000045
490.178	197.547	6017.37	1	1000000046
488.462	-5.96046e-08	6018.65	1	1000000047
446.092	19.9764	6018.46	1	1000000048
445.082	46.5236	6018.73	1	1000000049
476.122	63.8918	6019.19	1	1000000050
443.273	67.4056	6018.5	1	1000000051
499.826	98.6929	6019.73	1	1000000052
465.468	155.472	6018.53	1	1000000053
445.385	176.931	6019.57	1	1000000054
440.328	204.392	6019.64	1	1000000055
484.863	222.339	6019.31	1	1000000056
254.066	18.7121	6022.31	1	1000000057
465.621	138.521	6022.38	1	1000000058
451.777	231.137	6020.96	1	1000000059
429.504	5.01521	6023.62	1	1000000060
390.732	23.7486	6023.75	1	1000000061
400.215	61.5434	6023.98	1	1000000062
484.896	100.806	6023.73	1	1000000063
464.503	103.71	6023.59	1	1000000064
274.462	105.766	6024.64	1	1000000065
458.168	118.53	6024.57	1	1000000066
386.286	128.389	6023.48	1	1000000067
506.94	135.858	6023.74	1	1000000068
439.027	142.088	6023.91	1	1000000069
439.031	225.052	6022.61	1	1000000070
336.432	43.5609	6024.87	1	1000000071
421.291	118.175	6025.65	1	1000000072
375.753	142.735	6026.4	1	1000000073
326.65	60.6208	6028.14	1	1000000074
271.499	82.8108	6027.71	1	1000000075
349.367	199.472	6028.92	1	1000000076
407.229	197.959	6028.43	1	1000000077
437.933	200.466	6028.72	1	1000000078
456.14	204.618	6027.83	1	1000000079
260.764	211.969	6027.28	1	1000000080
284.14	234.985	6028.77	1	1000000081
340.471	76.8404	6031.17	1	1000000082
351.745	81.8385	6030.6	1	1000000083
402.191	90.4466	6030.5	1	1000000084
315.628	113.775	6030.7	1	1000000085
348.505	127.524	6029.98	1	1000000086
328.297	162.746	6030.29	1	1000000087
489.177	198.363	6031.21	1	1000000088
317.639	235.824	6030.3	1	1000000089
421.614	74.1471	6031.41	1	1000000090
322.165	81.2956	6032.1	1	1000000091
253.558	85.0828	6032.49	1	1000000092
466.658	238.868	6032.95	1	1000000093
380.332	241.321	6031.71	1	1000000094
205.898	347.81	6015.54	1	1000000095
151.484	320.489	6016.31	1	1000000096
212.723	358.914	6016.17	1	1000000097
51.0491	363.825	6017.32	1	1000000098
207.659	320.837	6021.34	1	1000000099
86.1587	256.738	6024.4	1	1000000100
252.295	281.483	6022.74	1	1000000101
164.882	440.092	6025.24	1	1000000102
115.291	376.299	6028.64	1	1000000103
242.203	400.542	6030.05	1	1000000104
57.3879	446.182	6029.18	1	1000000105
241.002	265.096	6033.47	1	1000000106
141.5	277.37	6031.52	1	1000000107
220.836	288.464	6032.13	1	1000000108
62.849	317.404	6032.13	1	1000000109
488.724	464.898	6001.1	1	1000000110
492.209	481.129	6007.39	1	1000000111
502.216	334.768	6010.36	1	1000000112
479.596	394.68	6011.07	1	1000000113
483.368	411.66	6011.4	1	1000000114
501.197	427.523	6010.73	1	1000000115
506.94	256.963	6013.04	1	1000000116
492.975	261.269	6012.43	1	1000000117
497.72	279.453	6014.86	1	1000000118
460.437	366.011	6014.47	1	1000000119
506.94	379.058	6015.48	1	1000000120
453.511	414.452	6014.28	1	1000000121
469.744	256.882	6016.02	1	1000000122
453.457	266.821	6017.48	1	1000000123
455.519	311.295	6017.38	1	1000000124
491.846	325.616	6016.99	1	1000000125
480.019	376.375	6017.63	1	1000000126
365.911	406.106	6016.5	1	1000000127
488.643	286.12	6019.54	1	1000000128
414.373	330.938	6019.07	1	1000000129
401.079	389.174	6019.81	1	1000000130
441.569	270.143	6022.2	1	1000000131
408.951	273.016	6021.85	1	1000000132
395.112	327.872	6021.63	1	1000000133
437.848	331.85	6021.12	1	1000000134
409.138	368.225	6020.61	1	1000000135
393.333	369.273	6021.31	1	1000000136
418.461	421.629	6021.73	1	1000000137
381.887	284.685	6023.04	1	1000000138
490.755	307.403	6023.21	1	1000000139
506.94	379.441	6024.15	1	1000000140
425.451	281.615	6025.3	1	1000000141
443.761	313.455	6026.45	1	1000000142
407.981	412.835	6026.52	1	1000000143
385.59	261.02	6027.56	1	1000000144
463.544	300.059	6027.12	1	1000000145
355.067	333.646	6027.32	1	1000000146
260.951	403.248	6027.6	1	1000000147
361.351	284.005	6030.43	1	1000000148
286.348	315.056	6029.15	1	1000000149
346.252	371.623	6030.44	1	1000000150
355.434	259.202	6032.78	1	1000000151
263.448	272.525	6032.09	1	1000000152
412.121	351.159	6032.8	1	1000000153
380.425	370.706	6033.15	1	1000000154
57.7233	39.0781	6034.82	1	1000000155
231.343	91.5915	6034.23	1	1000000156
181.298	193.396	6035.65	1	1000000157
172.952	38.0579	6036.85	1	1000000158
145.728	59.0557	6036.7	1	1000000159
215.721	13.7495	6038.89	1	1000000160
252.918	133.713	6039.64	1	1000000161
194.775	37.6021	6041.35	1	1000000162
73.9165	106.187	6041.5	1	1000000163
250.978	163.674	6041.56	1	1000000164
63.5793	188.76	6041.82	1	1000000165
221.613	122.749	6043.8	1	1000000166
188.399	117.6	6045.22	1	1000000167
181.486	201.115	6045.65	1	1000000168
181.078	236.571	6044.54	1	1000000169
203.152	252.207	6045.3	1	1000000170
114.754	123.518	6047.42	1	1000000171
163.772	179.284	6048.31	1	1000000172
213.087	202.98	6048.5	1	1000000173
157.756	234.469	6048.04	1	1000000174
179.845	52.2239	6050.48	1	1000000175
125.963	74.6421	6050.59	1	1000000176
150.784	102.834	6050.2	1	1000000177
237.184	186.031	6053.05	1	1000000178
218.642	49.7869	6054.15	1	1000000179
129.238	199.794	6056.26	1	1000000180
179.681	218.489	6056.95	1	1000000181
335.734	34.6995	6035.36	1	1000000182
254.08	155.544	6035.21	1	1000000183
261.01	167.052	6033.88	1	1000000184
353.23	186.012	6034.7	1	1000000185
292.164	237.352	6033.64	1	1000000186
306.987	11.459	6037.79	1	1000000187
293.314	58.3739	6036.32	1	1000000188
259.516	59.9653	6036.15	1	1000000189
356.242	69.8217	6036.4	1	1000000190
256.292	96.229	6036.15	1	1000000191
300.196	107.757	6036.96	1	1000000192
463.785	125.937	6036.23	1	1000000193
387.129	187.681	6037.34	1	1000000194
443.236	233.694	6036.66	1	1000000195
441.75	246.598	6036.67	1	1000000196
388.633	11.9713	6039.33	1	1000000197
493.065	55.4085	6038.52	1	1000000198
300.387	94.5677	6038.13	1	1000000199
321.614	172.563	6039.12	1	1000000200
459.397	173.813	6039	1	1000000201
286.474	217.54	6039.13	1	1000000202
476.401	224.147	6039.19	1	1000000203
363.912	-5.96046e-08	6040.39	1	1000000204
357.386	45.0877	6040.21	1	1000000205
500.926	144.842	6040.15	1	1000000206
484.03	166.389	6042.04	1	1000000207
484.799	188.648	6040.26	1	1000000208
495.988	14.5421	6042.93	1	1000000209
268.265	21.4708	6044.08	1	1000000210
280.71	99.5541	6043.37	1	1000000211
346.292	214.549	6043.45	1	1000000212
318.422	237.855	6043.74	1	1000000213
370.178	248.578	6043.35	1	1000000214
332.076	148.271	6046.2	1	1000000215
488.323	177.8	6045.57	1	1000000216
304.141	202.424	6046.51	1	1000000217
357.734	206.487	6045.46	1	1000000218
447.801	68.3197	6047.18	1	1000000219
495.023	190.662	6047.74	1	1000000220
370.074	217.005	6048.58	1	1000000221
365.298	19.5514	6050.9	1	1000000222
414.621	84.4773	6049.19	1	1000000223
397.593	92.8782	6050.55	1	1000000224
301.971	150.772	6049.84	1	1000000225
391.484	188.429	6049.99	1	1000000226
317.863	208.99	6050.88	1	1000000227
439.631	233.981	6049.61	1	1000000228
388.002	51.729	6051.32	1	1000000229
378.093	71.6245	6051.13	1	1000000230
355.608	109.032	6052.45	1	1000000231
457.356	111.898	6052.8	1	1000000232
396.728	150.894	6052.5	1	1000000233
320.202	176.954	6052.88	1	1000000234
493.514	17.9323	6054.04	1	1000000235
352.062	51.2393	6053.38	1	1000000236
374.164	136.794	6054.33	1	1000000237
326.908	61.0626	6057.45	1	1000000238
352.666	61.915	6057.45	1	1000000239
354.805	127.256	6056.02	1	1000000240
476.9	227.397	6058.87	1	1000000241
458.288	16.4342	6058.78	1	1000000242
460.201	40.9351	6061.48	1	1000000243
345.159	44.1495	6061.73	1	1000000244
466.074	119.996	6061.11	1	1000000245
418.572	85.2687	6062.42	1	1000000246
300.016	162.218	6064.11	1	1000000247
383.571	25.6788	6065.23	1	1000000248
386.158	62.5855	6067.6	1	1000000249
348.926	68.5179	6067.6	1	1000000250
41.2363	263.27	6033.54	1	1000000251
226.011	296.707	6037.19	1	1000000252
193.819	255.841	6038.98	1	1000000253
140.302	373.389	6042.29	1	1000000254
247.636	282.188	6045.81	1	1000000255
239.987	413.643	6046.53	1	1000000256
180.449	286.299	6047.27	1	1000000257
251.857	462.71	6051.04	1	1000000258
233.13	498.796	6050.46	1	1000000259
208.092	258.092	6058.79	1	1000000260
109.694	420.951	6061.42	1	1000000261
235.424	423.246	6063.38	1	1000000262
199.544	299.499	6065.81	1	1000000263
258.554	442.755	6035.41	1	1000000264
345.178	305.994	6036.05	1	1000000265
425.336	351.973	6037.29	1	1000000266
430.964	262.283	6040.1	1	1000000267
454.804	285.967	6038.46	1	1000000268
258.952	291.877	6041.77	1	1000000269
501.05	294.053	6041.67	1	1000000270
373.013	327.727	6041.9	1	1000000271
492.931	343.811	6040.52	1	1000000272
481.388	296.729	6046.04	1	1000000273
378.569	267.861	6048.58	1	1000000274
367.052	290.995	6047.51	1	1000000275
379.86	313.38	6048.59	1	1000000276
460.427	313.473	6047.98	1	1000000277
323.278	276.236	6052.53	1	1000000278
316.139	266.183	6056.2	1	1000000279
330.705	293.078	6059.51	1	1000000280
452.491	304.081	6059.9	1	1000000281
408.198	329.76	6059.57	1	1000000282
82.4762	222.479	6006.86	2	1000000001
103.362	223.686	6008.38	2	1000000000
125.526	53.0735	6011.35	2	1000000003
97.4022	76.0504	6009.89	2	1000000002
37.9079	248.61	6013.69	2	1000000005
18.8499	39.539	6014.45	2	1000000004
157.514	70.5401	6015.43	2	1000000007
132.661	24.0951	6016.75	2	1000000006
68.3436	29.6364	6020.14	2	1000000010
197.219	67.7745	6022.41	2	1000000016
198.523	144.649	6021.59	2	1000000008
89.1362	238.663	6021.76	2	1000000012
219.571	26.8816	6024.35	2	1000000013
175.075	55.9868	6024.4	2	1000000014
200.421	88.7281	6023.3	2	1000000017
118.202	139.661	6023.63	2	1000000011
61.9885	152.338	6024.64	2	1000000020
32.4751	200.044	6023.7	2	1000000023
201.781	23.8678	6025.86	2	1000000009
167.264	122.433	6026.34	2	1000000019
178.293	10.0754	6028.39	2	1000000027
78.4476	59.8119	6027.63	2	1000000015
104.451	94.1865	6028.11	2	1000000021
218.087	203.857	6028.24	2	1000000024
145.307	115.325	6029.21	2	1000000018
153.525	127.499	6029.24	2	1000000022
225.341	149.809	6029.92	2	1000000029
196.555	198.911	6031.14	2	1000000036
231.111	214.704	6029.81	2	1000000025
177.376	40.8148	6033.24	2	1000000158
207.153	61.9309	6031.61	2	1000000028
252.452	86.0133	6032.65	2	1000000092
224.536	137.395	6032.01	2	1000000032
232.346	158.983	6032.76	2	1000000034
180.068	194.745	6033.23	2	1000000157
121.419	214.119	6032.04	2	1000000026
482.092	87.5257	6010.34	2	1000000037
504.522	102.814	6010	2	1000000038
491.224	166.178	6013.46	2	1000000040
497.174	71.9713	6014.83	2	1000000039
473.221	137.046	6014.58	2	1000000042
472.353	163.152	6014.98	2	1000000045
478.398	18.8048	6018.03	2	1000000043
440.699	68.2266	6017.67	2	1000000051
501.513	80.8731	6017.48	2	1000000283
488.598	199.794	6017.26	2	1000000046
485.477	-5.96046e-08	6019.39	2	1000000047
449.483	21.5035	6018.19	2	1000000048
506.94	61.4611	6018.4	2	1000000284
473.695	65.4586	6018.89	2	1000000050
494.254	138.859	6019.98	2	1000000044
441.275	179.348	6019.67	2	1000000054
438.529	204.435	6019.24	2	1000000055
480.312	226.134	6018.51	2	1000000056
441.793	51.7218	6020.62	2	1000000049
497.635	101.531	6021	2	1000000052
462.887	156.956	6020.79	2	1000000053
451.657	231.241	6021.43	2	1000000285
430.81	11.1494	6023.66	2	1000000060
253.733	24.2654	6023.54	2	1000000057
401.386	62.1148	6023.22	2	1000000062
460.519	104.329	6023.56	2	1000000064
381.584	127.15	6023.8	2	1000000067
463.131	141.793	6023.11	2	1000000058
438.99	142.861	6024.61	2	1000000069
385.07	25.3829	6025.63	2	1000000061
336.485	43.9211	6026.25	2	1000000071
270.703	82.3797	6026.32	2	1000000075
481.03	99.6712	6025.34	2	1000000063
270.188	105.386	6024.96	2	1000000065
503.707	138.581	6025.62	2	1000000068
257.77	210.702	6026.09	2	1000000080
439.214	225.881	6025.97	2	1000000070
326.038	63.9085	6027.29	2	1000000074
418.033	119.763	6027.1	2	1000000072
456.288	120.958	6027.98	2	1000000066
347.71	127.404	6028.83	2	1000000086
373.305	141.85	6028.14	2	1000000073
276.046	234.553	6028.5	2	1000000081
326.6	162.953	6029.99	2	1000000087
488.296	200.538	6030.49	2	1000000088
348.69	204.595	6031.07	2	1000000076
454.119	208.255	6029.7	2	1000000079
316.413	238.396	6029.83	2	1000000089
317.994	81.3821	6031.48	2	1000000091
349.568	83.0267	6032.91	2	1000000083
400.128	92.7142	6033	2	1000000084
387.92	110.21	6032.72	2	1000000286
315.55	117.286	6031.9	2	1000000085
402.615	200.344	6031.51	2	1000000077
435.383	202.133	6031.46	2	1000000078
379.211	240.484	6032.22	2	1000000094
463.589	240.627	6032.55	2	1000000093
201.377	350.183	6014.97	2	1000000095
211.076	360.764	6015.17	2	1000000097
151.592	322.027	6016.82	2	1000000096
82.0613	260.239	6022.13	2	1000000100
246.264	278.738	6021.78	2	1000000101
206.097	325.95	6022.04	2	1000000099
163.602	438.2	6025.38	2	1000000102
37.6724	260.883	6029.6	2	1000000251
140.687	278.114	6030.67	2	1000000107
61.1451	318.356	6030.99	2	1000000109
116.478	377.056	6030.35	2	1000000103
239.246	403.473	6030.23	2	1000000104
53.6369	448.76	6030.88	2	1000000105
237.425	262.79	6032.66	2	1000000106
220.189	288.177	6031.49	2	1000000108
487.533	467.431	6003.15	2	1000000110
491.234	481.989	6008.37	2	1000000111
481.426	413.341	6011.34	2	1000000114
500.808	430.001	6009.66	2	1000000115
506.94	260.456	6013.33	2	1000000116
499.896	336.28	6012.25	2	1000000112
476.215	399.391	6011.81	2	1000000113
491.088	262.446	6014.21	2	1000000117
495.481	283.049	6014.86	2	1000000118
457.327	367.532	6015.89	2	1000000119
500.932	379.521	6014.59	2	1000000120
446.981	415.614	6015.29	2	1000000121
468.755	258.295	6017.55	2	1000000122
451.39	268.66	6016.77	2	1000000123
487.293	328.143	6017.27	2	1000000125
364.022	408.409	6017.35	2	1000000127
485.538	288.538	6019.77	2	1000000128
449.234	312.272	6018.45	2	1000000124
391.305	369.161	6020.11	2	1000000136
474.829	380.805	6019.48	2	1000000126
437.963	272.36	6021.71	2	1000000131
377.357	289.58	6022.23	2	1000000138
412.942	332.71	6020.51	2	1000000129
434.892	333.612	6021.42	2	1000000134
397.251	389.849	6021.41	2	1000000130
406.205	275.573	6023.96	2	1000000132
487.76	306.227	6024.15	2	1000000139
392.115	331.664	6022.71	2	1000000133
350.16	336.167	6023.7	2	1000000146
408.113	372.039	6023.27	2	1000000135
416.088	422.972	6023.6	2	1000000137
421.734	283.847	6025.56	2	1000000141
459.759	299.835	6026.36	2	1000000145
501.483	383.531	6024.75	2	1000000140
406.863	415.56	6025.93	2	1000000143
380.775	262.449	6028.55	2	1000000144
441.767	315.881	6027.76	2	1000000142
342.409	371.627	6028.43	2	1000000150
351.376	464.651	6027.2	2	1000000287
281.849	314.013	6029.69	2	1000000149
256.775	402.948	6029.34	2	1000000147
352.684	257.688	6032.52	2	1000000151
354.009	284.725	6031.32	2	1000000148
53.367	39.5757	6033.61	2	1000000155
252.78	97.3261	6034.07	2	1000000191
222.351	107.36	6033.91	2	1000000030
182.961	140.725	6033.73	2	1000000033
250.977	155.577	6034.38	2	1000000183
247.838	173.31	6033.61	2	1000000035
148.423	57.6347	6036.58	2	1000000159
222.637	98.3651	6036.16	2	1000000156
244.73	108.573	6036.89	2	1000000031
212.868	14.6882	6039.98	2	1000000160
247.407	135.157	6039.65	2	1000000161
61.0761	190.674	6038.72	2	1000000165
72.3434	107.643	6040.74	2	1000000163
247.76	163.988	6041.2	2	1000000164
193.005	37.1347	6042.72	2	1000000162
186.101	117.875	6043.56	2	1000000167
112.046	120.78	6043.97	2	1000000171
220.356	124.69	6044.25	2	1000000166
181.475	199.529	6044.27	2	1000000168
178.554	240.187	6044.42	2	1000000169
208.833	204.659	6045.48	2	1000000173
198.941	251.472	6047.06	2	1000000170
124.117	71.0425	6050.9	2	1000000176
147.086	104.748	6050.81	2	1000000177
163.037	179.635	6049.06	2	1000000172
151.149	234.482	6050.03	2	1000000174
179.083	53.9963	6051.75	2	1000000175
234.522	188.81	6051.22	2	1000000178
212.463	52.0132	6054.69	2	1000000179
181.153	220.1	6055.2	2	1000000181
129.681	196.509	6056.25	2	1000000180
336.128	34.2245	6034.81	2	1000000182
290.482	58.5668	6034.99	2	1000000188
418.393	73.0308	6034.94	2	1000000090
338.619	76.4068	6035.06	2	1000000082
259.745	166.874	6033.83	2	1000000184
352.438	188.629	6034.89	2	1000000185
290.034	237.683	6033.78	2	1000000186
308.833	10.8705	6035.92	2	1000000187
258.336	61.4573	6036.54	2	1000000189
355.213	69.5756	6036.24	2	1000000190
300.235	109.136	6036.57	2	1000000192
319.403	174.255	6037	2	1000000200
385.332	188.671	6037.77	2	1000000194
444.63	235.683	6037.43	2	1000000195
441.798	248.163	6036.74	2	1000000196
386.436	13.3423	6040.06	2	1000000197
492.451	57.9681	6039.42	2	1000000198
298.345	96.8261	6038.65	2	1000000199
460.65	128.304	6038.46	2	1000000193
500.639	146.006	6038.9	2	1000000206
458.051	174.9	6039.82	2	1000000201
283.768	218.835	6038.05	2	1000000202
360.55	5.14666	6040.35	2	1000000204
267.545	22.6846	6040.85	2	1000000210
356.637	50.1997	6041.07	2	1000000205
484.714	190.839	6040.6	2	1000000208
368.723	246.811	6040.96	2	1000000214
493.953	16.7238	6043.09	2	1000000209
274.216	99.385	6042.48	2	1000000211
331.419	149.567	6043.66	2	1000000215
481.747	170.067	6045.73	2	1000000207
355.058	207.401	6045.47	2	1000000218
345.805	216.771	6045.66	2	1000000212
318.153	237.79	6045.68	2	1000000213
447.294	68.0769	6048.14	2	1000000219
411.072	86.3564	6047.28	2	1000000223
489.576	181.724	6047.73	2	1000000216
492.959	195.866	6048.55	2	1000000220
400.941	95.2818	6051	2	1000000224
299.759	149.446	6049.47	2	1000000225
388.036	188.485	6051.05	2	1000000226
300.383	201.37	6050.8	2	1000000217
368.889	218.938	6049.45	2	1000000221
437.989	235.116	6049.56	2	1000000228
361.589	21.5622	6052.47	2	1000000222
375.594	70.3977	6051.8	2	1000000230
459.722	113.101	6051.7	2	1000000232
371.248	137.851	6051.46	2	1000000237
318.198	180.28	6052.66	2	1000000234
385.698	50.4102	6053.93	2	1000000229
354.004	56.0453	6053.54	2	1000000236
354.486	108.964	6054.52	2	1000000231
352.9	130.981	6054.2	2	1000000240
392.341	153.099	6053.9	2	1000000233
325.61	60.7211	6056.48	2	1000000238
352.616	65.4578	6057.01	2	1000000239
314.473	210.257	6055.69	2	1000000227
466.991	120.713	6058.87	2	1000000245
477.314	229.376	6059.22	2	1000000241
460.118	20.4523	6061.32	2	1000000242
461.44	43.4453	6060.65	2	1000000243
419.734	86.3146	6060.09	2	1000000246
346.652	46.0061	6063.29	2	1000000244
387.707	28.6322	6065.23	2	1000000248
302.937	164.559	6065.1	2	1000000247
387.299	65.0081	6067.6	2	1000000249
350.668	69.8884	6067.6	2	1000000250
224.819	300.399	6034.48	2	1000000252
189.758	253.623	6039.25	2	1000000253
139.27	377.92	6043.51	2	1000000254
179.098	284.338	6046.43	2	1000000257
241.244	419.379	6045.63	2	1000000256
246.782	278.864	6050.73	2	1000000255
251.308	467.21	6051.05	2	1000000258
229.303	499.726	6054.69	2	1000000259
205.184	255.479	6056.81	2	1000000260
106.061	426.259	6058.28	2	1000000261
199.269	302.098	6063.1	2	1000000263
234.359	426.968	6062.76	2	1000000262
260.333	273.843	6033.59	2	1000000152
343.488	308.1	6034.13	2	1000000265
410.306	352.887	6034.55	2	1000000153
375.712	374.036	6034.27	2	1000000154
428.715	263.568	6037.79	2	1000000267
460.695	375.501	6036.21	2	1000000288
254.437	445.451	6035.77	2	1000000264
453.551	289.169	6039.3	2	1000000268
493.544	345.351	6038.8	2	1000000272
422.729	354.136	6038.57	2	1000000266
494.937	382.403	6038.25	2	1000000289
256.351	289.332	6041.66	2	1000000269
369.904	326.729	6040.27	2	1000000271
499.786	297.334	6043.42	2	1000000270
365.147	294.791	6046.63	2	1000000275
479.925	299.655	6046.08	2	1000000273
377.588	313.465	6046.32	2	1000000276
461.802	316.292	6048.28	2	1000000277
374.223	269.285	6049.06	2	1000000274
318.546	278.871	6052.36	2	1000000278
314.54	265.273	6056.99	2	1000000279
406.221	331.334	6058.77	2	1000000282
327.203	294.506	6060.35	2	1000000280
452.398	307.407	6062.25	2	1000000281
79.806	220.129	6007.81	3	1000000001
102.811	226.941	6007.52	3	1000000000
19.6724	41.8611	6010.77	3	1000000004
122.605	57.7005	6010.15	3	1000000003
95.5736	77.2632	6010.04	3	1000000002
33.8761	252.967	6010.97	3	1000000005
130.393	24.8517	6014.46	3	1000000006
154.845	69.0231	6017.55	3	1000000007
67.7343	35.9988	6021.6	3	1000000010
169.331	56.3198	6022.4	3	1000000014
59.1777	154.15	6021.9	3	1000000020
90.1415	238.235	6021.24	3	1000000012
119.339	243.617	6021.87	3	1000000290
216.963	29.2844	6023.6	3	1000000013
194.003	72.7815	6023.17	3	1000000016
196.668	90.7384	6024.14	3	1000000017
115.385	144.782	6023.01	3	1000000011
200.015	144.359	6023.85	3	1000000008
29.4344	202.695	6023.48	3	1000000023
198.895	25.6467	6024.77	3	1000000009
101.329	93.307	6026.07	3	1000000021
175.059	7.78994	6027.17	3	1000000027
77.5173	59.0296	6028.29	3	1000000015
165.07	123.016	6028.49	3	1000000019
149.68	130.191	6028.15	3	1000000022
215.13	205.306	6027.31	3	1000000024
116.107	216.61	6028.79	3	1000000026
142.846	121.373	6029.54	3	1000000018
222.707	150.537	6029.3	3	1000000029
178.94	195.706	6030.61	3	1000000157
191.489	201.546	6030.56	3	1000000036
177.058	42.9109	6031.92	3	1000000158
248.891	88.9123	6031.44	3	1000000092
218.605	108.855	6033.39	3	1000000030
220.832	139.425	6033.4	3	1000000032
181.495	141.505	6032.72	3	1000000033
249.768	156.399	6032.97	3	1000000183
230.1	159.333	6032.19	3	1000000034
228.082	214.542	6032.23	3	1000000025
506.94	77.5299	6009.66	3	1000000041
480.214	89.5846	6010.39	3	1000000037
503.813	105.296	6010.9	3	1000000038
493.778	74.065	6014.79	3	1000000039
490.384	117.775	6014.23	3	1000000291
472.536	136.523	6015.12	3	1000000042
488.444	169.793	6014.57	3	1000000040
485.598	200.042	6015.9	3	1000000046
505.453	59.0735	6017.44	3	1000000284
439.436	68.6623	6018.05	3	1000000051
469.515	166.94	6016.4	3	1000000045
477.203	228.197	6017.15	3	1000000056
475.147	19.0223	6019.13	3	1000000043
450.425	25.3263	6019.3	3	1000000048
440.693	55.1351	6020.09	3	1000000049
471.377	65.3136	6019.48	3	1000000050
500.482	81.7489	6018.67	3	1000000283
439.674	182.384	6019.6	3	1000000054
437.442	205.042	6019.73	3	1000000055
483.155	2.77442	6021.02	3	1000000047
459.423	106.358	6022.35	3	1000000064
491.419	141.278	6021.28	3	1000000044
459.565	160.432	6022.06	3	1000000053
450.906	236.439	6021.34	3	1000000285
428.997	16.0646	6022.86	3	1000000060
254.257	28.6089	6023.86	3	1000000057
400.968	65.1841	6022.74	3	1000000062
496.068	105.172	6022.67	3	1000000052
436.917	145.726	6023.58	3	1000000069
460.004	144.704	6023.83	3	1000000058
381.42	26.0752	6025.77	3	1000000061
324.697	68.6091	6025.92	3	1000000074
478.481	99.0368	6025.78	3	1000000063
266.471	106.605	6025.59	3	1000000065
377.352	126.861	6024.74	3	1000000067
501.757	139.025	6026.2	3	1000000068
257.206	208.196	6025.76	3	1000000080
268.963	234.73	6026.61	3	1000000081
335.294	46.664	6026.91	3	1000000071
270.04	82.8944	6029	3	1000000075
417.987	122.415	6027.69	3	1000000072
372.161	143.121	6027.45	3	1000000073
443.719	226.116	6028.27	3	1000000070
346.38	85.5825	6030.93	3	1000000083
452.522	122.262	6030.48	3	1000000066
346.108	128.624	6030.84	3	1000000086
323.254	164.606	6029.31	3	1000000087
434.509	202.925	6029.18	3	1000000078
486.67	202.718	6031.3	3	1000000088
349.131	207.563	6031.06	3	1000000076
453.582	209.726	6030.15	3	1000000079
313.546	239.266	6030.64	3	1000000089
460.992	241.59	6030.43	3	1000000093
350.773	252.897	6030.94	3	1000000151
312.072	77.4979	6032	3	1000000091
399.011	93.777	6031.32	3	1000000084
313.897	119.503	6032.12	3	1000000085
400.076	203.392	6032.15	3	1000000077
379.203	243.199	6032.03	3	1000000094
150.795	323.229	6015.33	3	1000000096
200.289	349.963	6013.82	3	1000000095
210.057	357.438	6014.58	3	1000000097
203.386	330.426	6021.38	3	1000000099
75.5513	263.728	6022.86	3	1000000100
239.727	278.322	6022.54	3	1000000101
163.775	439.122	6025.69	3	1000000102
35.001	260.6	6028.05	3	1000000251
238.734	406.686	6029.1	3	1000000104
136.835	278.583	6030.03	3	1000000107
217.329	290.701	6030.25	3	1000000108
234.651	262.518	6032.64	3	1000000106
222.44	301.643	6031.32	3	1000000252
114.375	377.861	6032.7	3	1000000103
48.6649	451.176	6032.55	3	1000000105
486.246	469.547	6003.42	3	1000000110
496.911	430.052	6008.35	3	1000000115
490.633	483.456	6007.31	3	1000000111
503.639	263.392	6012.83	3	1000000116
486.844	264.197	6012.37	3	1000000117
497.068	339.098	6012.57	3	1000000112
498.265	381.03	6013	3	1000000120
476.142	403.277	6011.53	3	1000000113
477.913	415.309	6013.37	3	1000000114
484.374	332.264	6015.52	3	1000000125
454.939	365.789	6015.37	3	1000000119
442.319	418.22	6015.45	3	1000000121
448.897	274.421	6017.58	3	1000000123
492.016	286.432	6016.42	3	1000000118
481.418	290.029	6017.68	3	1000000128
467.772	260.343	6019.03	3	1000000122
442.692	313.766	6019.56	3	1000000124
351.273	341.503	6019.02	3	1000000146
387.626	372.85	6019.58	3	1000000136
460.642	404.359	6019.05	3	1000000292
361.406	410.65	6018.54	3	1000000127
432.564	275.919	6021.95	3	1000000131
411.544	331.863	6021.47	3	1000000129
388.758	333.794	6022	3	1000000133
432.466	336.644	6020.47	3	1000000134
471.648	384.324	6021.87	3	1000000126
374.822	295.379	6023.31	3	1000000138
403.66	375.687	6022.89	3	1000000135
499.191	386.137	6023.29	3	1000000140
392.715	393.633	6022.84	3	1000000130
412.452	425.266	6024.27	3	1000000137
405.557	275.082	6026.28	3	1000000132
419.829	286.072	6026.63	3	1000000141
458.106	301.99	6025.63	3	1000000145
484.293	306.319	6025.55	3	1000000139
402.979	419.491	6025.17	3	1000000143
348.657	466.125	6025.28	3	1000000287
379.189	261	6028.48	3	1000000144
279.173	313.686	6028.73	3	1000000149
338.782	373.336	6027.73	3	1000000150
254.863	406.5	6027.7	3	1000000147
348.121	287.713	6030.22	3	1000000148
394.125	329.974	6029.89	3	1000000293
395.024	279.36	6032.09	3	1000000294
341.207	309.954	6032.51	3	1000000265
55.0302	41.8727	6033.73	3	1000000155
200.853	64.7822	6033.76	3	1000000028
247.244	176.249	6034.89	3	1000000035
217.948	99.9418	6036.16	3	1000000156
238.574	110.202	6037.05	3	1000000031
243.236	136.223	6036.67	3	1000000161
56.8482	193.795	6037.08	3	1000000165
211.899	17.537	6038.15	3	1000000160
149.54	59.3202	6038.45	3	1000000159
71.3451	107.913	6040.12	3	1000000163
183.344	119.757	6042.12	3	1000000167
244.764	165.139	6041.85	3	1000000164
190.875	39.5293	6044.18	3	1000000162
112.02	121.523	6043.3	3	1000000171
160.83	181.708	6044.43	3	1000000172
178.947	200.748	6042.5	3	1000000168
203.478	205.687	6042.63	3	1000000173
216.377	129.012	6045.08	3	1000000166
174.15	244.049	6045.54	3	1000000169
146.943	234.368	6048.87	3	1000000174
194.782	252.381	6046.77	3	1000000170
178.644	47.9309	6050.84	3	1000000175
231.958	189.228	6050.28	3	1000000178
121.518	69.1748	6052.03	3	1000000176
210.616	53.7145	6053.5	3	1000000179
140.835	103.78	6054.61	3	1000000177
128.354	196.077	6054.93	3	1000000180
180.747	221.697	6055.49	3	1000000181
310.287	10.9959	6034.41	3	1000000187
333.691	34.7942	6035.2	3	1000000182
289.284	57.7565	6033.91	3	1000000188
387.645	109.228	6034.21	3	1000000286
298.346	111.212	6035.57	3	1000000192
261.826	168.252	6034.12	3	1000000184
288.938	238.295	6033.53	3	1000000186
439.296	245.982	6034.95	3	1000000295
359.295	53.2837	6037.87	3	1000000296
255.305	65.2011	6036.09	3	1000000189
353.921	70.5644	6035.71	3	1000000190
416.355	73.887	6037.71	3	1000000090
333.717	77.1701	6037.56	3	1000000082
295.593	96.8351	6037.21	3	1000000199
318.016	176.965	6037.44	3	1000000200
351.642	189.293	6035.76	3	1000000185
382.154	188.314	6037.53	3	1000000194
279.159	215.275	6036.1	3	1000000202
444.116	238.81	6035.98	3	1000000195
359.327	6.54219	6038.52	3	1000000204
382.668	14.7018	6039.73	3	1000000197
265.948	24.5548	6039.99	3	1000000210
456.039	127.278	6039.77	3	1000000193
476.346	231.952	6039.28	3	1000000203
366.766	248.898	6040.03	3	1000000214
490.993	61.5609	6040.82	3	1000000198
269.965	100.155	6042.1	3	1000000211
500.423	148.393	6041.29	3	1000000206
456.076	176.487	6041.44	3	1000000201
482.582	192.727	6040.47	3	1000000208
491.534	18.0575	6042.94	3	1000000209
328.627	152.31	6043.64	3	1000000215
408.959	87.7802	6046.3	3	1000000223
480.384	173.343	6044.85	3	1000000207
489.499	182.906	6045.62	3	1000000216
344.037	219.68	6044.91	3	1000000212
350.028	208.406	6048.4	3	1000000218
435.018	236.876	6047.91	3	1000000228
441.846	70.343	6050.21	3	1000000219
399.794	97.5384	6049.27	3	1000000224
369.778	138.748	6050.58	3	1000000237
292.841	148.908	6051.05	3	1000000225
491.185	199.748	6049.87	3	1000000220
368.324	219.186	6050.93	3	1000000221
445.148	-5.96046e-08	6051.2	3	1000000297
375.925	70.196	6052.12	3	1000000230
458.539	115.904	6051.79	3	1000000232
316.251	180.908	6052.74	3	1000000234
383.873	189.168	6051.61	3	1000000226
493.489	21.6802	6053.97	3	1000000235
358.503	24.4992	6054.02	3	1000000222
355.491	57.999	6054.55	3	1000000236
385.936	155.476	6055.26	3	1000000233
293.948	200.528	6054	3	1000000217
312.202	214.869	6055.47	3	1000000227
381.001	47.604	6055.7	3	1000000229
321.664	61.7239	6055.65	3	1000000238
350.16	67.2574	6055.89	3	1000000239
352.55	108.628	6057.32	3	1000000231
467.086	122.806	6057.69	3	1000000245
351.226	128.953	6056.25	3	1000000240
421.304	88.9793	6059.44	3	1000000246
460.594	22.179	6060.24	3	1000000242
462.062	44.2699	6061.43	3	1000000243
389.814	30.9555	6064.06	3	1000000248
348.143	48.3008	6064.16	3	1000000244
475.295	232.56	6062.64	3	1000000241
387.882	67.0576	6067.6	3	1000000249
351.079	72.2508	6067.6	3	1000000250
59.885	317.862	6034.77	3	1000000109
252.527	451.286	6034.98	3	1000000264
184.042	254.696	6038.1	3	1000000253
251.93	288.187	6041.25	3	1000000269
139.601	379.741	6042.66	3	1000000254
240.504	423.68	6045.88	3	1000000256
177.842	281.032	6048.22	3	1000000257
248.275	471.791	6052.08	3	1000000258
244.269	278.446	6054.82	3	1000000255
226.915	500.793	6055.32	3	1000000259
199.054	257.45	6056.85	3	1000000260
101.81	430.377	6058.9	3	1000000261
198.091	304.565	6060.69	3	1000000263
235.838	431.877	6062.2	3	1000000262
254.402	274.636	6034.57	3	1000000152
419.319	356.785	6035	3	1000000266
406.227	357.448	6035.24	3	1000000153
373.367	377.227	6033.87	3	1000000154
459.937	377.59	6035.4	3	1000000288
425.924	266.452	6036.47	3	1000000267
366.023	324.86	6037.59	3	1000000271
493.636	347.722	6037.79	3	1000000272
441.888	253.841	6038.3	3	1000000196
449.81	292.199	6039.07	3	1000000268
486.778	274.886	6040.88	3	1000000298
493.872	386.325	6040.49	3	1000000289
360.818	298.099	6045.85	3	1000000275
499.074	300.185	6046.2	3	1000000270
373.915	314.14	6045.81	3	1000000276
370.787	272.206	6047.01	3	1000000274
478.296	301.376	6048.61	3	1000000273
464.323	319.053	6049.29	3	1000000277
311.908	264.278	6056.95	3	1000000279
321.745	292.679	6058.55	3	1000000280
451.952	309.049	6058.72	3	1000000281
404.034	334.342	6059.8	3	1000000282
19.5816	40.2008	6005.75	4	1000000004
77.988	218.653	6008.34	4	1000000001
99.5085	226.193	6007.98	4	1000000000
119.475	59.9559	6011.06	4	1000000003
94.7267	77.3696	6010.74	4	1000000002
148.701	67.854	6015.1	4	1000000299
128.586	23.3748	6016.24	4	1000000006
59.5903	153.082	6019.39	4	1000000020
65.1432	39.2942	6020.79	4	1000000010
163.003	55.3834	6021.96	4	1000000014
153.624	69.6497	6021.13	4	1000000007
189.114	89.1607	6021.26	4	1000000017
87.1914	238.788	6021.44	4	1000000012
117.373	245.351	6021.25	4	1000000290
173.213	6.39313	6023.97	4	1000000027
195.388	26.8515	6024.63	4	1000000009
191.75	73.5124	6023.66	4	1000000016
201.604	144.824	6024.65	4	1000000008
30.3247	203.238	6022.52	4	1000000023
252.068	31.0902	6026.33	4	1000000057
215.577	33.8457	6025.15	4	1000000013
99.6572	92.0888	6025.69	4	1000000021
110.687	144.431	6025.74	4	1000000011
76.8703	58.8173	6027.21	4	1000000015
139.648	121.866	6028.31	4	1000000018
159.65	122.413	6028.26	4	1000000019
146.878	130.844	6027.67	4	1000000022
213.118	201.707	6027.43	4	1000000024
189.261	202.629	6028.76	4	1000000036
57.3529	43.2574	6029.93	4	1000000155
177.003	43.9285	6031.28	4	1000000158
244.607	96.7749	6031.25	4	1000000092
220.645	151.946	6029.2	4	1000000029
228.623	161.003	6031.01	4	1000000034
214.047	100.749	6032.82	4	1000000156
215.2	110.439	6032.19	4	1000000030
176.592	194.44	6032.27	4	1000000157
112.051	215.676	6031.42	4	1000000026
506.94	76.1255	6007.6	4	1000000041
477.113	91.1773	6010.34	4	1000000037
502.505	108.704	6010.55	4	1000000038
488.328	120.425	6010.75	4	1000000291
493.046	76.3802	6013.43	4	1000000039
473.887	137.167	6015.46	4	1000000042
468.708	168.672	6015.07	4	1000000045
487.656	172.667	6015.22	4	1000000040
483.798	201.115	6014.97	4	1000000046
499.841	57.1022	6017.9	4	1000000284
437.493	69.1133	6017.96	4	1000000051
473.22	230.855	6016.66	4	1000000056
480.828	5.30494	6019.64	4	1000000047
473.296	19.1113	6018.31	4	1000000043
450.671	29.2137	6018.88	4	1000000048
437.719	56.8552	6020.21	4	1000000049
469.006	65.5634	6019.68	4	1000000050
452.558	239.814	6020.04	4	1000000285
496.546	80.923	6021.09	4	1000000283
456.666	106.508	6022.48	4	1000000064
490.944	141.726	6020.86	4	1000000044
433.523	182.397	6021.18	4	1000000054
445.947	237.857	6022.13	4	1000000059
425.045	20.4745	6023.49	4	1000000060
399.333	66.0365	6024.22	4	1000000062
494.883	107.281	6022.85	4	1000000052
457.529	147.316	6024.14	4	1000000058
435.459	148.573	6024.55	4	1000000069
457.598	163.01	6022.84	4	1000000053
434.587	208.828	6023.27	4	1000000055
474.899	98.3752	6026.17	4	1000000063
266.679	105.187	6025.7	4	1000000065
373.9	128.611	6026.72	4	1000000067
501.855	140.805	6025.44	4	1000000068
254.144	206.532	6025.9	4	1000000080
263.866	232.713	6026.9	4	1000000081
378.249	25.8791	6027.93	4	1000000061
334.701	47.573	6027.93	4	1000000071
321.841	74.401	6027.7	4	1000000074
270.051	79.1949	6028.8	4	1000000075
415.69	126.661	6029.04	4	1000000072
371.134	143.095	6028.86	4	1000000073
321.374	165.125	6027.82	4	1000000087
342.986	86.9464	6029.6	4	1000000083
397.864	97.7461	6031.21	4	1000000084
314.677	122.408	6030.78	4	1000000085
345.184	127.244	6030.58	4	1000000086
348.851	210.076	6031.26	4	1000000076
443.389	226.364	6031.14	4	1000000070
308.267	240.511	6031.19	4	1000000089
308.622	77.8118	6032.31	4	1000000091
295.271	111.338	6034.88	4	1000000192
451.527	124.819	6033.35	4	1000000066
431.97	206.037	6031.83	4	1000000078
485.902	205.876	6032.31	4	1000000088
453.433	213.108	6032.4	4	1000000079
380.767	244.469	6031.72	4	1000000094
349.465	250.555	6032.53	4	1000000151
35.3894	258.565	6011.04	4	1000000005
197.827	348.338	6013.68	4	1000000095
151.889	323.958	6015.17	4	1000000096
214.13	354.643	6016.39	4	1000000097
42.2964	366.034	6019.92	4	1000000098
235.286	277.212	6021.41	4	1000000101
199.278	331.041	6022.44	4	1000000099
70.9319	266.58	6022.6	4	1000000100
167.033	438.902	6024.51	4	1000000102
135.42	483.239	6023.25	4	1000000300
214.506	288.196	6028.66	4	1000000108
252.579	406.373	6027.64	4	1000000147
131.105	277.162	6029.28	4	1000000107
237.146	408.625	6030.75	4	1000000104
230.287	261.115	6031.72	4	1000000106
33.6048	262.544	6031.48	4	1000000251
216.683	301.349	6032.61	4	1000000252
485.758	471.416	6005.11	4	1000000110
491.77	484.144	6005.96	4	1000000111
492.094	429.666	6008.09	4	1000000115
494.005	342.573	6011.92	4	1000000112
475.178	406.877	6013.17	4	1000000113
502.97	265.25	6014	4	1000000116
481.204	265.866	6015.23	4	1000000117
506.94	320.823	6013.74	4	1000000301
480.607	335.423	6015.01	4	1000000125
494.927	381.369	6014.15	4	1000000120
473.193	414.94	6015.44	4	1000000114
506.94	279.16	6016.92	4	1000000302
489.805	287.055	6016.73	4	1000000118
478.622	290.81	6017.93	4	1000000128
349.659	345.55	6017.71	4	1000000146
454.015	362.159	6016.96	4	1000000119
441.827	419.796	6016.85	4	1000000121
467.751	260.629	6019.58	4	1000000122
448.629	276.608	6019.79	4	1000000123
410.973	329.892	6019.94	4	1000000129
439.23	313.923	6020.35	4	1000000124
428.678	338.049	6020.61	4	1000000134
384.954	373.182	6021.66	4	1000000136
400.46	378.419	6021.7	4	1000000135
468.624	384.959	6020.62	4	1000000126
459.318	402.781	6020.71	4	1000000292
357.795	410.058	6022.03	4	1000000127
431.711	276.862	6022.81	4	1000000131
370.276	299.51	6023.4	4	1000000138
391.21	391.632	6022.6	4	1000000130
412.012	426.045	6024.53	4	1000000137
347.9	467.257	6024.16	4	1000000287
456.027	301.512	6026.5	4	1000000145
483.7	304.977	6025.52	4	1000000139
384.5	335.687	6025.24	4	1000000133
499.153	386.388	6025.18	4	1000000140
401.537	419.601	6025.51	4	1000000143
374.465	260.327	6027.68	4	1000000144
406.077	274.554	6027.6	4	1000000132
413.841	287.863	6028.34	4	1000000141
344.105	290.958	6028.89	4	1000000148
277.082	312.325	6028.74	4	1000000149
337.278	374.006	6027.45	4	1000000150
435.03	317.541	6029.74	4	1000000142
391.145	325.636	6029.91	4	1000000293
391.013	281.368	6032.22	4	1000000294
415.658	357.08	6033.02	4	1000000266
370.017	378.477	6033.34	4	1000000154
209.341	17.8455	6034.01	4	1000000160
195.817	68.4457	6035.12	4	1000000028
177.418	142.763	6035.44	4	1000000033
213.582	142.144	6033.91	4	1000000032
248.446	156.54	6033.84	4	1000000183
55.4913	195.273	6034.07	4	1000000165
225.093	211.085	6034.16	4	1000000025
234.157	111.328	6037.18	4	1000000031
240.75	136.529	6036.48	4	1000000161
247.56	175.362	6036.8	4	1000000035
149.339	57.8574	6038.23	4	1000000159
179.915	118.674	6039.31	4	1000000167
70.0309	107.337	6041.03	4	1000000163
111.195	119.519	6041.68	4	1000000171
156.621	181.433	6041.56	4	1000000172
178.349	200.442	6041.44	4	1000000168
198.578	202.553	6041.02	4	1000000173
244.007	164.004	6043.13	4	1000000164
188.501	38.5793	6045.28	4	1000000162
194.466	89.3214	6045.17	4	1000000303
214.368	130.811	6046.07	4	1000000166
171.346	244.352	6044.6	4	1000000169
193.815	250.938	6046.52	4	1000000170
227.064	183.305	6047.62	4	1000000178
141.159	233.629	6047.96	4	1000000174
118.224	67.5392	6050.96	4	1000000176
176.124	46.2751	6051.15	4	1000000175
207.739	53.3598	6054.52	4	1000000179
135.209	101.225	6054.94	4	1000000177
206.242	104.869	6055.33	4	1000000304
123.248	193.508	6054.83	4	1000000180
177.958	223.76	6054.22	4	1000000181
306.727	11.1589	6034.29	4	1000000187
286.086	54.829	6034.72	4	1000000188
350.979	67.578	6034.97	4	1000000190
383.751	105.236	6034.2	4	1000000286
349.092	190.1	6035.38	4	1000000185
286.335	239.561	6034.43	4	1000000186
329.12	36.0811	6036.59	4	1000000182
361.202	49.2898	6037.64	4	1000000296
259.8	167.333	6036.19	4	1000000184
316.37	178.414	6037.02	4	1000000200
379.888	186.262	6037.1	4	1000000194
275.706	213.217	6036.3	4	1000000202
476.777	234.09	6037.18	4	1000000203
446.419	240.45	6036.59	4	1000000195
438.683	247.269	6036.35	4	1000000295
359.447	8.25541	6038.14	4	1000000204
262.657	24.8774	6039.14	4	1000000210
414.665	72.7095	6038.98	4	1000000090
293.07	98.2356	6038.13	4	1000000199
453.507	127.642	6039.74	4	1000000193
398.967	204.495	6038.33	4	1000000077
311.47	235.044	6038.78	4	1000000213
364.468	250.701	6038.63	4	1000000214
378.017	14.9789	6040.35	4	1000000197
490.734	19.5208	6041.71	4	1000000209
489.287	65.811	6041.14	4	1000000198
263.285	99.427	6042.27	4	1000000211
501.401	150.842	6041.5	4	1000000206
476.893	174.94	6042.22	4	1000000207
481.152	194.321	6041.44	4	1000000208
356.058	53.3523	6042.37	4	1000000205
330.209	152.901	6043.15	4	1000000215
454.646	180.055	6042.99	4	1000000201
342.472	223.146	6044.04	4	1000000212
329.685	75.7565	6044.86	4	1000000082
405.976	85.8785	6046.27	4	1000000223
506.94	92.6252	6048.73	4	1000000305
489.931	186.882	6047.61	4	1000000216
399.598	99.3009	6050.59	4	1000000224
458.709	117.295	6050.47	4	1000000232
364.447	141.673	6050.49	4	1000000237
289.997	145.536	6050.42	4	1000000225
491.416	202.024	6050.66	4	1000000220
365.219	222.393	6050.73	4	1000000221
435.318	238.928	6049.91	4	1000000228
444.841	-5.96046e-08	6052.87	4	1000000297
494.575	23.0319	6051.89	4	1000000235
372.307	68.3245	6052.37	4	1000000230
436.823	73.7402	6052.58	4	1000000219
315.17	180.247	6052.29	4	1000000234
382.719	188.083	6051.93	4	1000000226
342.066	208.298	6051.5	4	1000000218
355.845	26.0857	6054.23	4	1000000222
376.283	45.4429	6054.55	4	1000000229
354.35	59.0398	6054.9	4	1000000236
382.695	155.173	6053.8	4	1000000233
318.129	61.4272	6056.65	4	1000000238
344.266	67.1179	6057.51	4	1000000239
352.449	108.47	6057.08	4	1000000231
287.014	200.49	6056.04	4	1000000217
306.639	222.1	6056.57	4	1000000227
421.826	91.3008	6059.37	4	1000000246
467.206	124.845	6058.52	4	1000000245
350.655	129.294	6057.85	4	1000000240
476.594	234.222	6059.53	4	1000000241
462.959	24.4217	6060.85	4	1000000242
463.444	47.3357	6061.12	4	1000000243
307.262	167.568	6065.34	4	1000000247
389.882	32.7749	6067.6	4	1000000248
347.621	50.1652	6067.6	4	1000000244
388.823	67.866	6067.6	4	1000000249
353.114	72.9697	6067.6	4	1000000250
113.58	379.359	6035.1	4	1000000103
46.0475	450.819	6034.05	4	1000000105
251.986	451.767	6034.78	4	1000000264
179.655	253.696	6037.44	4	1000000253
117.741	257.423	6036.02	4	1000000306
250.479	276.105	6035.83	4	1000000152
60.8534	315.943	6037.42	4	1000000109
248.513	287.453	6040.57	4	1000000269
139.253	381.194	6046.09	4	1000000254
238.838	425.737	6046.25	4	1000000256
175.365	281.1	6048.49	4	1000000257
79.0546	278.453	6051.25	4	1000000307
248.283	475.273	6052.96	4	1000000258
229.098	501.248	6054.19	4	1000000259
197.28	256.442	6056.07	4	1000000260
241.991	279.636	6056.71	4	1000000255
198.514	303.837	6059.43	4	1000000263
100.226	431.054	6059.3	4	1000000261
236.124	435.867	6062.74	4	1000000262
422.437	267.096	6035.16	4	1000000267
338.233	311.977	6033.62	4	1000000265
361.626	326.286	6036.38	4	1000000271
492.497	349.487	6036.39	4	1000000272
402.906	356.162	6036.63	4	1000000153
485.241	274.379	6039.03	4	1000000298
450.077	295.272	6039.11	4	1000000268
443.292	259.651	6040.47	4	1000000196
493.436	386.6	6042.75	4	1000000289
369.644	272.562	6045.69	4	1000000274
498.931	301.859	6046.13	4	1000000270
356.266	305.081	6046.46	4	1000000275
371.49	315.808	6044.85	4	1000000276
476.791	302.272	6047.93	4	1000000273
464.954	320.187	6047.55	4	1000000277
307.416	260.728	6055.59	4	1000000279
310.25	275.931	6055.66	4	1000000278
317.044	291.748	6056.9	4	1000000280
400.794	334.127	6055.57	4	1000000282
452	310.505	6062.79	4	1000000281
16.962	40.3932	6002.28	5	1000000004
74.2236	216.782	6008.96	5	1000000001
98.9075	225.873	6008.15	5	1000000000
115.222	63.8223	6010.56	5	1000000003
93.9694	79.8299	6011.12	5	1000000002
126.573	21.6416	6014.86	5	1000000006
145.059	67.9932	6015.33	5	1000000299
58.0319	156.806	6017.83	5	1000000020
156.494	56.6509	6018.82	5	1000000014
113.348	245.284	6019.93	5	1000000290
192.119	26.1707	6022.44	5	1000000009
150.998	72.7623	6021.53	5	1000000007
190.673	78.0199	6022.38	5	1000000016
184.153	89.6153	6021.15	5	1000000017
108.574	142.154	6023.6	5	1000000011
34.7715	203.006	6022.09	5	1000000023
171.552	5.02602	6024.04	5	1000000027
63.599	41.1864	6023.97	5	1000000010
96.9231	92.3437	6022.95	5	1000000021
250.36	202.559	6024.46	5	1000000080
84.6658	240.368	6024.48	5	1000000012
249.46	32.7711	6026.15	5	1000000057
213.936	35.4974	6025.53	5	1000000013
54.7152	45.6077	6025.76	5	1000000155
243.872	93.1804	6025.72	5	1000000191
201.917	147.682	6024.89	5	1000000008
211.583	198.435	6026.2	5	1000000024
186.712	202.113	6026.4	5	1000000036
73.8937	58.0752	6027.78	5	1000000015
137.045	121.927	6027.67	5	1000000018
142.856	130.027	6027.86	5	1000000022
243.14	69.0553	6029.24	5	1000000308
158.359	121.493	6030.14	5	1000000019
217.5	153.712	6030.05	5	1000000029
226.896	162.998	6030.06	5	1000000034
173.455	46.6207	6031.45	5	1000000158
214.225	100.866	6032.64	5	1000000156
210.231	110.619	6033.5	5	1000000030
247.079	154.968	6031.34	5	1000000183
175.907	191.064	6031.98	5	1000000309
56.9812	197.102	6032.47	5	1000000165
224.648	208.448	6032.66	5	1000000025
114.859	213.519	6032.22	5	1000000026
506.94	72.8831	6009.95	5	1000000041
473.161	91.0971	6010.07	5	1000000037
500.671	113.071	6010.81	5	1000000038
483.719	121.732	6012.6	5	1000000291
506.94	135.366	6012.07	5	1000000310
490.195	76.9525	6013.88	5	1000000039
450.303	31.7284	6017.68	5	1000000048
494.9	56.6897	6017.14	5	1000000284
464.639	68.1626	6017.87	5	1000000050
471.564	137.388	6016.99	5	1000000042
506.94	155.385	6016.38	5	1000000311
467.204	171.602	6016.46	5	1000000045
483.133	173.819	6016.19	5	1000000040
482.791	202.273	6016.44	5	1000000046
479.352	7.84119	6020.02	5	1000000047
470.158	20.2283	6020.03	5	1000000043
433.305	68.1573	6018.36	5	1000000051
467.627	233.967	6019.25	5	1000000056
452.221	242.318	6019.32	5	1000000285
435.764	58.2755	6021.64	5	1000000049
456.058	108.854	6021	5	1000000064
488.462	144.125	6021.33	5	1000000044
429.58	183.122	6020.56	5	1000000054
421.103	21.9407	6024.17	5	1000000060
494.812	82.89	6023.2	5	1000000283
495.03	109.624	6024.57	5	1000000052
455.938	149.363	6024.68	5	1000000058
456.008	164.468	6024.09	5	1000000053
430.662	210.391	6023.96	5	1000000055
442.91	240.358	6024.03	5	1000000059
397.782	67.3878	6026.18	5	1000000062
268.051	102.409	6026.07	5	1000000065
500.627	140.598	6026.01	5	1000000068
433.333	152.277	6025.29	5	1000000069
377.068	27.09	6028.04	5	1000000061
316.938	75.0613	6027.08	5	1000000074
270.06	77.9024	6028.02	5	1000000075
471.95	102.153	6027.51	5	1000000063
314.438	123.164	6029.03	5	1000000085
369.391	128.979	6028.55	5	1000000067
318.288	164.893	6028.61	5	1000000087
263.559	230.201	6027.25	5	1000000081
332.576	49.3404	6029.37	5	1000000071
506.94	64.0979	6030.35	5	1000000312
341.011	87.7278	6029.85	5	1000000083
393.627	100.586	6030.27	5	1000000084
346.146	126.922	6029.14	5	1000000086
415.019	129.18	6029.62	5	1000000072
368.403	143.345	6029.52	5	1000000073
447.92	246.954	6030.88	5	1000000093
432.885	207.375	6031.94	5	1000000078
484.429	207.415	6032.91	5	1000000088
347.323	211.021	6031.52	5	1000000076
451.432	212.668	6032.72	5	1000000079
441.8	227.899	6032.45	5	1000000070
302.287	242.03	6031.53	5	1000000089
349.262	250.455	6032.38	5	1000000151
33.8958	258.346	6010.77	5	1000000005
150.486	324.182	6013.66	5	1000000096
194.68	351.915	6016.4	5	1000000095
212.588	353.986	6018.49	5	1000000097
41.3644	365.297	6020.01	5	1000000098
64.6279	270.04	6022.24	5	1000000100
232.823	278.379	6022.04	5	1000000101
196.307	335.338	6021.89	5	1000000099
166.89	441.133	6023.94	5	1000000102
133.877	487.172	6022.94	5	1000000300
251.614	408.006	6026.43	5	1000000147
124.958	278.82	6028.02	5	1000000107
225.694	264.603	6030.88	5	1000000106
210.363	287.1	6029.3	5	1000000108
34.5913	260.463	6033.44	5	1000000251
237.089	409.929	6031.4	5	1000000104
484.314	473.18	6005.67	5	1000000110
492.141	484.656	6006	5	1000000111
489.264	429.924	6008.82	5	1000000115
486.982	344.794	6012.89	5	1000000112
473.624	410.127	6012.69	5	1000000113
500.455	265.427	6014.71	5	1000000116
506.94	277.919	6015.11	5	1000000302
492.192	382.3	6014.91	5	1000000120
475.67	268.982	6016.21	5	1000000117
487.839	288.39	6017.04	5	1000000118
502.886	321.46	6016.1	5	1000000301
476.561	337.393	6016.81	5	1000000125
453.126	363.393	6016.31	5	1000000119
476.087	291.198	6018.68	5	1000000128
438.119	315.255	6020.22	5	1000000124
410.12	330.652	6019.08	5	1000000129
425.772	340.974	6020	5	1000000134
346.218	346.599	6018.43	5	1000000146
439.784	420.677	6019.04	5	1000000121
465.915	261.358	6020.84	5	1000000122
446.564	279.673	6020.8	5	1000000123
398.858	379.378	6021.43	5	1000000135
467.032	387.148	6020.78	5	1000000126
391.566	392.06	6021.64	5	1000000130
457.049	398.916	6020.98	5	1000000292
430.608	278.932	6023.98	5	1000000131
366.085	303.017	6022.96	5	1000000138
347.088	469.062	6023.61	5	1000000287
374.595	254.578	6026.23	5	1000000144
452.018	301.871	6026.21	5	1000000145
499.075	386.707	6026.22	5	1000000140
352.403	410.678	6024.9	5	1000000127
411.301	425.673	6024.78	5	1000000137
406.08	275.537	6028.18	5	1000000132
341.312	293.563	6028.64	5	1000000148
481.755	306.669	6027.14	5	1000000139
335.281	375.17	6028	5	1000000150
399.15	419.865	6027.49	5	1000000143
409.39	290.17	6030.11	5	1000000141
274.587	314.347	6029.48	5	1000000149
433.525	318.888	6030.14	5	1000000142
389.507	324.435	6031	5	1000000293
506.94	341.838	6030.73	5	1000000313
418.987	269.338	6032.45	5	1000000267
389.658	284.908	6031.55	5	1000000294
336.318	311.919	6032.91	5	1000000265
359.989	328.175	6033.32	5	1000000271
412.979	359.32	6033.36	5	1000000266
206.675	17.3201	6033.81	5	1000000160
192.062	70.5748	6034.12	5	1000000028
214.536	144.155	6034.72	5	1000000032
248.33	171.654	6034.47	5	1000000035
246.936	73.1929	6037.6	5	1000000189
240.213	102.414	6035.78	5	1000000092
230.843	110.701	6036.41	5	1000000031
239.896	135.491	6037.41	5	1000000161
148.792	56.9243	6039.97	5	1000000159
66.2454	107.74	6039.65	5	1000000163
174.61	119.346	6039.44	5	1000000167
171.837	145.133	6039.39	5	1000000033
158.936	180.832	6039.46	5	1000000172
245.503	162.796	6041.8	5	1000000164
177.258	200.404	6041.11	5	1000000168
185.196	38.9219	6043.03	5	1000000162
193.687	91.5283	6043.13	5	1000000303
111.679	119.801	6042.48	5	1000000171
193.813	202.513	6043.87	5	1000000173
210.705	134.036	6044.76	5	1000000166
170.262	244.915	6045.05	5	1000000169
191.39	250.693	6045.83	5	1000000170
223.727	185.207	6047.95	5	1000000178
172.121	45.0344	6050.33	5	1000000175
117.598	68.4674	6049.24	5	1000000176
137.824	233.347	6049.9	5	1000000174
178.527	221.853	6052.69	5	1000000181
130.978	103.3	6054.25	5	1000000177
201.349	105.388	6053.64	5	1000000304
203.151	53.9573	6055.7	5	1000000179
121.371	190.117	6056.84	5	1000000180
302.44	11.4828	6034.11	5	1000000187
459.152	19.6452	6034.85	5	1000000314
258.069	25.2738	6033.53	5	1000000210
325.706	38.402	6034.79	5	1000000182
281.256	55.2856	6034.73	5	1000000188
348.549	66.047	6034.64	5	1000000190
305.796	77.1996	6034.1	5	1000000091
291.31	109.551	6035.4	5	1000000192
259.062	164.621	6033.84	5	1000000184
346.423	192.193	6034.93	5	1000000185
282.686	240.575	6035.39	5	1000000186
381.04	246.248	6034.08	5	1000000094
359.375	47.3417	6036.57	5	1000000296
290.609	98.6847	6037.22	5	1000000199
272.484	212.67	6037.72	5	1000000202
306.877	235.718	6037.13	5	1000000213
436.64	247.996	6036.27	5	1000000295
364.141	250.387	6036.56	5	1000000214
357.585	9.14771	6038.15	5	1000000204
374.312	16.7877	6039.17	5	1000000197
412.945	75.1879	6038.49	5	1000000090
257.765	97.6656	6039.93	5	1000000211
311.931	182.747	6038.78	5	1000000200
376.391	188.354	6038.57	5	1000000194
474.353	236.613	6038.83	5	1000000203
447.947	242.6	6038.4	5	1000000195
490.076	22.2216	6041.15	5	1000000209
328.194	36.4091	6041.31	5	1000000315
353.824	57.4818	6041.44	5	1000000205
493.072	69.1643	6042.1	5	1000000198
448.077	128.756	6041.26	5	1000000193
501.785	152.475	6041.96	5	1000000206
478.779	195.337	6040.28	5	1000000208
398.798	202.648	6042.01	5	1000000077
441.369	36.0228	6044.5	5	1000000316
329.575	152.678	6042.86	5	1000000215
455.054	182.636	6043.75	5	1000000201
340.044	225.342	6043.67	5	1000000212
506.94	94.7161	6046.25	5	1000000305
453.416	135.999	6045.69	5	1000000317
359.53	140.112	6046.33	5	1000000237
476.073	176.319	6045.15	5	1000000207
403.467	86.9759	6047.04	5	1000000223
349.817	60.2535	6050.32	5	1000000236
287.356	143.059	6049.98	5	1000000225
489.315	189.516	6049.07	5	1000000216
492.374	204.738	6050.45	5	1000000220
434.71	239.733	6050.42	5	1000000228
442.545	-5.96046e-08	6051.89	5	1000000297
494.199	25.4322	6052.2	5	1000000235
367.765	68.5232	6053.18	5	1000000230
433.195	73.125	6052.65	5	1000000219
324.789	75.0113	6051.8	5	1000000082
399.941	101.79	6052.05	5	1000000224
460.23	119.905	6051.88	5	1000000232
313.576	180.207	6051.68	5	1000000234
382.744	186.942	6051.56	5	1000000226
336.484	210.743	6051.92	5	1000000218
366.259	226.141	6052.69	5	1000000221
354.289	28.4029	6053.83	5	1000000222
375.972	43.066	6055.19	5	1000000229
378.762	156.419	6053.61	5	1000000233
316.966	61.1135	6057.28	5	1000000238
342.197	67.9266	6057.17	5	1000000239
350.379	108.91	6056.37	5	1000000231
352.355	128.244	6057.42	5	1000000240
280.181	199.747	6057.07	5	1000000217
464.898	49.2694	6059.34	5	1000000243
422.847	93.2123	6059.82	5	1000000246
469.005	128.448	6059.18	5	1000000245
302.576	223.548	6059.06	5	1000000227
476.471	236.469	6058.33	5	1000000241
465.428	27.3929	6061.38	5	1000000242
391.532	34.8094	6065.79	5	1000000248
306.934	169.787	6066	5	1000000247
349.371	50.5803	6067.6	5	1000000244
390.287	68.8891	6067.6	5	1000000249
353.507	75.0714	6067.6	5	1000000250
437.956	208.626	6067.6	5	1000000318
174.737	253.556	6034.76	5	1000000253
210.728	299.054	6034.12	5	1000000252
252.278	454.797	6035.22	5	1000000264
113.305	258.095	6036.35	5	1000000306
238.861	258.618	6036.79	5	1000000319
246.368	277.878	6035.92	5	1000000152
114.141	380.304	6035.92	5	1000000103
44.3339	452.167	6035.9	5	1000000105
245.428	286.41	6041.5	5	1000000269
57.904	314.384	6041.41	5	1000000109
173.92	282.081	6043.91	5	1000000257
138.476	380.494	6043.87	5	1000000254
79.1749	281.877	6050.44	5	1000000307
236.172	424.729	6050.61	5	1000000256
197.704	302.751	6053.24	5	1000000263
246.637	477.487	6051.63	5	1000000258
195.647	253.928	6054.39	5	1000000260
227.396	503.676	6054.46	5	1000000259
240.474	283.564	6057.5	5	1000000255
97.2769	426.99	6059.43	5	1000000261
235.271	435.884	6061.47	5	1000000262
399.375	358.088	6035.1	5	1000000153
456.636	381.8	6034.3	5	1000000288
368.511	383.718	6035.58	5	1000000154
441.309	261.482	6038.93	5	1000000196
447.514	295.85	6039.29	5	1000000268
492.922	350.239	6038.12	5	1000000272
493.515	389.425	6041.78	5	1000000289
370.851	273.645	6042.43	5	1000000274
355.105	307.087	6044.67	5	1000000275
371.401	316.213	6045.08	5	1000000276
498.336	303.072	6047.17	5	1000000270
475.613	303.251	6048.5	5	1000000273
463.426	322.209	6047.05	5	1000000277
398.887	336.671	6054.73	5	1000000282
304.774	254.112	6056.82	5	1000000279
308.094	275.488	6057.25	5	1000000278
312.396	288.715	6056.64	5	1000000280
452.783	314.228	6062.61	5	1000000281
15.5972	39.7048	5999.4	6	1000000004
95.0421	226.965	6007.56	6	1000000000
109.594	65.3579	6010.21	6	1000000003
91.9451	80.9801	6010.84	6	1000000002
124.187	21.686	6013.3	6	1000000006
69.2408	215.481	6012.59	6	1000000001
142.002	68.1497	6014.86	6	1000000299
154.46	54.9668	6017.59	6	1000000014
54.2114	161.06	6016.58	6	1000000020
105.492	142.277	6018.66	6	1000000011
37.1434	204.11	6020.23	6	1000000023
109.717	244.037	6018.65	6	1000000290
163.318	-5.96046e-08	6020.63	6	1000000320
188.633	25.3431	6021.69	6	1000000009
51.5756	48.0382	6020.83	6	1000000155
148.838	74.9374	6021.1	6	1000000007
189.285	84.73	6021.68	6	1000000016
182.278	89.4196	6020.8	6	1000000017
242.342	199.608	6021.92	6	1000000080
171.582	6.99932	6022.89	6	1000000027
211.346	35.9873	6024.4	6	1000000013
59.399	46.0899	6024.03	6	1000000010
246.549	34.7353	6024.74	6	1000000057
96.7154	91.7704	6025.37	6	1000000021
239.179	91.344	6025.86	6	1000000191
139.895	128.951	6026.02	6	1000000022
201.685	149.3	6026.2	6	1000000008
206.198	196.965	6025.38	6	1000000024
184.873	203.267	6025.63	6	1000000036
82.7131	243.741	6026.35	6	1000000012
71.2666	57.6838	6028.21	6	1000000015
239.446	69.6998	6027.84	6	1000000308
158.8	120.747	6028.95	6	1000000019
135.813	122.31	6027.52	6	1000000018
214.839	155.956	6027.95	6	1000000029
243.393	159.345	6028.08	6	1000000183
171.466	46.4936	6029.58	6	1000000158
95.6121	157.331	6030.07	6	1000000321
226.24	164.913	6030.96	6	1000000034
172.214	191.381	6030.32	6	1000000309
59.2887	200.237	6030.23	6	1000000165
115.296	214.654	6030.77	6	1000000026
203.622	15.9025	6031.98	6	1000000160
252.125	23.703	6031.73	6	1000000210
187.768	73.5624	6032.19	6	1000000028
213.601	103.681	6032.55	6	1000000156
208.557	112.674	6033.35	6	1000000030
222.133	206.163	6031.39	6	1000000025
506.94	71.7735	6010.65	6	1000000041
470.739	94.7724	6011.26	6	1000000037
500.762	114.848	6011.2	6	1000000038
506.94	135.073	6011.04	6	1000000310
488.934	81.4418	6013.37	6	1000000039
487.164	126.586	6013.59	6	1000000291
506.94	154.526	6011.59	6	1000000311
481.15	174.838	6015.28	6	1000000040
481.149	204.223	6015.76	6	1000000046
451.56	35.7036	6017.68	6	1000000048
493.26	57.2443	6016.62	6	1000000284
471.904	138.302	6016.99	6	1000000042
465.067	173.008	6015.96	6	1000000045
506.94	202.5	6017.3	6	1000000322
431.267	68.3688	6019.4	6	1000000051
459.861	70.5666	6018.56	6	1000000050
486.077	145.869	6019.33	6	1000000044
464.078	236.941	6019.99	6	1000000056
474.333	10.5475	6020.89	6	1000000047
466.505	23.0062	6020.79	6	1000000043
455.741	112.169	6022.09	6	1000000064
506.94	166.223	6021.84	6	1000000323
423.316	182.83	6020.34	6	1000000054
428.184	211.4	6022.19	6	1000000055
452.475	244.141	6020.33	6	1000000285
435.454	58.7987	6023.1	6	1000000049
494.704	113.445	6024.26	6	1000000052
454.022	165.892	6024.23	6	1000000053
417.069	23.2468	6025.23	6	1000000060
311.574	79.7015	6026.4	6	1000000074
493.36	85.4276	6025.59	6	1000000283
497.766	143.691	6026	6	1000000068
453.743	152.315	6026.39	6	1000000058
432.027	154.285	6025.71	6	1000000069
371.32	252.619	6025.34	6	1000000144
454.606	17.705	6027.14	6	1000000314
374.465	29.0417	6029.07	6	1000000061
394.961	69.6657	6027.5	6	1000000062
270.454	78.2008	6028.52	6	1000000075
470.966	106.192	6027.67	6	1000000063
258.247	231.577	6027	6	1000000081
329.668	53.3628	6030.42	6	1000000071
506.94	67.1188	6030.46	6	1000000312
337.598	92.2729	6030.52	6	1000000083
265.002	100.007	6030.05	6	1000000065
393.642	102.37	6030.99	6	1000000084
343.209	129.097	6030.11	6	1000000086
414.711	133.667	6030.15	6	1000000072
319.392	164.218	6029.45	6	1000000087
438.305	246.109	6029.77	6	1000000093
279.447	55.2523	6032.49	6	1000000188
345.412	63.8191	6032.62	6	1000000190
379.888	107.247	6032.46	6	1000000286
313.413	125.848	6031.33	6	1000000085
448.49	127.079	6032.95	6	1000000066
366.528	131.313	6032.5	6	1000000067
367.175	144.911	6032.01	6	1000000073
254.86	162.16	6032.61	6	1000000184
432.575	208.986	6032.04	6	1000000078
485.451	209.004	6033.27	6	1000000088
343.964	210.828	6032.76	6	1000000076
435.704	230.153	6031.73	6	1000000070
299.077	244.834	6032.32	6	1000000089
347.282	252.258	6032.01	6	1000000151
30.0198	260.812	6009.47	6	1000000005
146.164	326.271	6015.72	6	1000000096
194.109	351.878	6015.67	6	1000000095
214.695	354.445	6019.45	6	1000000097
62.7906	271.516	6023.22	6	1000000100
229.545	280.626	6021.88	6	1000000101
193.724	335.32	6021.65	6	1000000099
41.5891	367.529	6020.4	6	1000000098
121.905	281.183	6023.05	6	1000000107
168.607	441.48	6022.7	6	1000000102
129.237	490.136	6025.65	6	1000000300
247.759	407.523	6026.6	6	1000000147
206.414	287.518	6030.33	6	1000000108
167.081	255.298	6032.78	6	1000000253
36.4609	262.431	6032.27	6	1000000251
224.19	264.43	6032.34	6	1000000106
234.138	411.555	6032.18	6	1000000104
42.0121	449.36	6032.14	6	1000000105
252.842	454.92	6033.27	6	1000000264
484.451	475.473	6005.97	6	1000000110
490.663	485.597	6005.26	6	1000000111
485.581	431.683	6009.68	6	1000000115
482.53	348.001	6013.38	6	1000000112
506.94	279.946	6015.57	6	1000000302
451.674	363.091	6015.82	6	1000000119
489.325	382.346	6015.76	6	1000000120
472.353	411.703	6014.65	6	1000000113
498.966	267.248	6016.09	6	1000000116
496.354	323.288	6017.65	6	1000000301
473.177	340.34	6017.44	6	1000000125
465.518	415.644	6017.99	6	1000000114
473.464	272.031	6019.1	6	1000000117
487.242	290.063	6018.73	6	1000000118
475.929	293.838	6020.14	6	1000000128
436.996	315.908	6019.96	6	1000000124
406.662	328.219	6018.54	6	1000000129
341.106	345.789	6019.09	6	1000000146
396.101	382.362	6020.07	6	1000000135
440.381	421.598	6018.81	6	1000000121
464.061	260.635	6022.33	6	1000000122
446.066	285.503	6020.76	6	1000000123
423.775	342.081	6020.87	6	1000000134
382.332	372.491	6021.85	6	1000000136
465.007	390.676	6020.57	6	1000000126
454.534	401.277	6020.91	6	1000000292
428.527	280.242	6024.5	6	1000000131
365.573	304.658	6022.85	6	1000000138
389.693	395.098	6023.3	6	1000000130
346.614	469.084	6024.11	6	1000000287
448.418	302.185	6026.14	6	1000000145
376.438	338.438	6025.85	6	1000000133
332.932	375.02	6026.54	6	1000000150
494.812	387.536	6025.49	6	1000000140
397.196	421.034	6026.63	6	1000000143
410.813	425.391	6025.91	6	1000000137
405.058	276.014	6029.01	6	1000000132
404.428	292.335	6028.96	6	1000000141
480.654	306.56	6027.75	6	1000000139
269.493	314.366	6027.62	6	1000000149
488.141	327.396	6028.27	6	1000000324
343.919	409.286	6027.35	6	1000000127
387.24	287.075	6030.83	6	1000000294
337.883	294.139	6029.24	6	1000000148
506.94	343.199	6029.25	6	1000000313
385.637	308.648	6032.41	6	1000000325
336.031	313.686	6031.51	6	1000000265
432.269	319.803	6031.54	6	1000000142
385.227	324.923	6032.05	6	1000000293
356.352	327.888	6033.06	6	1000000271
408.354	357.948	6032.97	6	1000000266
226.69	110.475	6035.68	6	1000000031
212.871	147.385	6034.71	6	1000000032
244.987	171.844	6033.82	6	1000000035
242.752	78.4922	6036.92	6	1000000189
239.017	103.089	6037.85	6	1000000092
168.952	120.24	6037.68	6	1000000167
241.632	137.438	6037.23	6	1000000161
157.698	182.721	6036.72	6	1000000172
146.258	55.1764	6039.53	6	1000000159
62.1115	108.239	6039.26	6	1000000163
168.208	145.234	6038.35	6	1000000033
183.252	37.9714	6041.36	6	1000000162
190.943	94.5866	6041.29	6	1000000303
253.271	98.6778	6040.34	6	1000000211
111.578	119.748	6040.55	6	1000000171
207.577	135.436	6042.89	6	1000000166
244.015	163.236	6042.54	6	1000000164
172.765	199.667	6043.05	6	1000000168
190.764	204.86	6044.08	6	1000000173
166.317	248.224	6042.44	6	1000000169
220.757	188.765	6046.11	6	1000000178
137.359	237.667	6046.43	6	1000000174
113.643	67.9262	6048.43	6	1000000176
186.351	252.801	6047.44	6	1000000170
177.18	222.256	6049.52	6	1000000181
169.178	44.365	6051.4	6	1000000175
128.997	105.15	6052.83	6	1000000177
196.071	107.504	6053.83	6	1000000304
189.855	252.44	6054.73	6	1000000260
119.495	188.007	6057.23	6	1000000180
242.827	79.2644	6059.93	6	1000000326
322.552	41.8212	6033.91	6	1000000182
358.904	48.4741	6034.89	6	1000000296
301.536	78.2824	6035.58	6	1000000091
288.575	112.459	6034.93	6	1000000192
343.666	192.526	6033.71	6	1000000185
449.767	214.486	6034.17	6	1000000079
302.799	238.009	6034.71	6	1000000213
277.308	242.639	6034.2	6	1000000186
382.032	245.498	6034.95	6	1000000094
353.825	10.0806	6037.49	6	1000000204
302.29	12.2664	6036.21	6	1000000187
374.611	187.31	6036.85	6	1000000194
362.754	249.985	6036.41	6	1000000214
435.244	250.237	6037.42	6	1000000295
287.07	98.4195	6039.5	6	1000000199
306.817	185.333	6038.87	6	1000000200
481.238	196.317	6039.86	6	1000000208
268.158	213.711	6037.98	6	1000000202
475.81	240.256	6038.1	6	1000000203
369.668	20.542	6040.38	6	1000000197
486.107	24.1685	6040.42	6	1000000209
440.437	39.1499	6041.46	6	1000000316
492.522	71.0791	6040.14	6	1000000198
411.574	77.6469	6042.14	6	1000000090
444.662	131.37	6041.44	6	1000000193
502.009	155.072	6040.51	6	1000000206
447.767	246.344	6040.36	6	1000000195
474.666	177.536	6043.76	6	1000000207
455.858	184.507	6043.92	6	1000000201
397.1	200.753	6044.3	6	1000000077
337.099	226.873	6043.42	6	1000000212
327.624	38.6852	6044.56	6	1000000315
504.573	97.0864	6045.3	6	1000000305
452.597	138.082	6045.73	6	1000000317
356.56	139.187	6046.31	6	1000000237
331.552	155.054	6044.97	6	1000000215
340.384	62.5139	6048.24	6	1000000236
366.207	69.2448	6048.42	6	1000000230
400.46	87.4241	6048.32	6	1000000223
463.219	152.476	6048.62	6	1000000327
492.221	190.992	6048.48	6	1000000216
493.272	27.6279	6050.28	6	1000000235
354.045	31.0478	6050.73	6	1000000222
284.162	144.304	6049.91	6	1000000225
440.68	2.43588	6051.66	6	1000000297
398.808	104.13	6051.33	6	1000000224
379.499	158.016	6052.17	6	1000000233
307.939	179.108	6051.19	6	1000000234
379.444	183.732	6051.81	6	1000000226
492.786	207.736	6051.33	6	1000000220
332.097	212.238	6051.23	6	1000000218
431.549	243.692	6051.94	6	1000000228
374.858	41.703	6054.47	6	1000000229
323.088	74.1633	6054.02	6	1000000082
433.228	73.624	6054.71	6	1000000219
461.592	123.222	6053.35	6	1000000232
273.758	200.342	6055.39	6	1000000217
368.304	224.486	6054.16	6	1000000221
477.177	238.134	6054.99	6	1000000241
301.657	251.551	6054.14	6	1000000279
315.409	61.262	6055.75	6	1000000238
339.869	68.19	6055.62	6	1000000239
345.012	108.813	6056.4	6	1000000231
352.604	122.829	6057.39	6	1000000240
362.467	230.534	6055.62	6	1000000328
297.681	224.244	6058.27	6	1000000227
465.533	52.1949	6059.92	6	1000000243
421.604	96.0847	6061.08	6	1000000246
469.676	129.676	6060.64	6	1000000245
467.271	30.5427	6062.73	6	1000000242
441.194	209.405	6062.72	6	1000000318
392.899	36.7592	6064.74	6	1000000248
307.788	171.643	6066.38	6	1000000247
350.865	53.8255	6067.6	6	1000000244
390.794	71.1871	6067.6	6	1000000249
235.024	258.213	6035.44	6	1000000319
242.929	278.312	6034.94	6	1000000152
109.04	260.712	6037.25	6	1000000306
205.332	294.066	6037.64	6	1000000252
113.252	379.975	6036.56	6	1000000103
243.925	286.736	6040.39	6	1000000269
171.969	280.761	6042.71	6	1000000257
54.4121	314.82	6044.06	6	1000000109
137.664	379.415	6043.4	6	1000000254
196.272	305.371	6048.16	6	1000000263
78.2702	282.821	6049.29	6	1000000307
232.461	425.488	6049.48	6	1000000256
245.295	479.506	6052.28	6	1000000258
236.323	287.417	6055.86	6	1000000255
97.7274	425.002	6056.97	6	1000000261
226.349	506.94	6058.73	6	1000000259
237.941	437.97	6066.21	6	1000000262
393.838	358.611	6034.63	6	1000000153
455.525	383.089	6035.69	6	1000000288
438.937	263.572	6037.39	6	1000000196
412.276	274.989	6035.99	6	1000000267
482.169	278.635	6037.4	6	1000000298
448.665	299.995	6037.62	6	1000000268
363.41	387.728	6036.36	6	1000000154
491.783	353.21	6039.28	6	1000000272
370.27	274.987	6040.91	6	1000000274
368.978	316.017	6043.64	6	1000000276
351.558	309.707	6045.5	6	1000000275
462.183	323.439	6046.12	6	1000000277
498.467	307.727	6048.41	6	1000000270
425.514	332.811	6047.13	6	1000000329
475.555	304.836	6049.71	6	1000000273
395.172	338.688	6051.39	6	1000000282
305.965	275.414	6054.08	6	1000000278
309.016	286.376	6054.69	6	1000000280
363.778	438.192	6054.24	6	1000000330
453.096	316.19	6062.29	6	1000000281
103.251	65.4705	6009.11	7	1000000003
93.5272	226.831	6008.45	7	1000000000
88.0625	81.3567	6011.47	7	1000000002
50.7172	160.902	6013.35	7	1000000020
123.823	20.2403	6015.69	7	1000000006
136.088	68.6177	6014.96	7	1000000299
66.0285	213.899	6014.82	7	1000000001
46.063	49.8685	6017.38	7	1000000155
150.752	51.3478	6016.95	7	1000000014
103.32	143.921	6016.22	7	1000000011
107.737	244.776	6017.5	7	1000000290
182.223	23.5799	6020.02	7	1000000009
179.119	89.1301	6020.06	7	1000000017
168.881	-5.96046e-08	6022.14	7	1000000320
145.327	77.3402	6021.68	7	1000000007
187.571	91.1019	6021.33	7	1000000016
237.334	196.332	6021.84	7	1000000080
40.1428	205.795	6021.84	7	1000000023
171.374	5.82392	6023.1	7	1000000027
208.425	38.8405	6025.28	7	1000000013
66.0935	61.6707	6025.94	7	1000000015
237.917	88.3621	6024.74	7	1000000191
95.8678	91.8254	6025.81	7	1000000021
137.778	129.265	6025.82	7	1000000022
200.009	147.623	6025.99	7	1000000008
240.41	157.712	6026.85	7	1000000183
170.388	190.964	6026.85	7	1000000309
202.377	193.65	6026.71	7	1000000024
181.995	203.023	6024.8	7	1000000036
241.536	35.9069	6028.11	7	1000000057
170.131	44.9255	6027.78	7	1000000158
53.8804	55.8855	6028.52	7	1000000010
236.939	67.849	6028.44	7	1000000308
157.552	119.154	6028.1	7	1000000019
131.387	121.535	6027.48	7	1000000018
214.476	153.295	6026.98	7	1000000029
98.0254	157.008	6027.39	7	1000000321
57.2826	199.781	6028.34	7	1000000165
82.6356	243.145	6028.26	7	1000000012
183.784	73.3223	6030.39	7	1000000028
212.499	102.019	6030.43	7	1000000156
252.814	159.051	6030.79	7	1000000184
224.155	164.752	6029.98	7	1000000034
220.871	204.757	6030.23	7	1000000025
198.718	16.9455	6032.41	7	1000000160
248.48	24.2932	6032.85	7	1000000210
206.304	112.346	6032.98	7	1000000030
242.632	169.215	6032.39	7	1000000035
170.892	199.779	6031.59	7	1000000157
506.94	179.915	6008.63	7	1000000331
505.218	153.519	6010.25	7	1000000311
501.143	70.5412	6011.7	7	1000000041
465.859	99.2463	6012.17	7	1000000037
495.308	115.791	6012.23	7	1000000038
484.547	129.06	6012.2	7	1000000291
506.94	132.764	6011.65	7	1000000310
490.303	58.1107	6015.67	7	1000000284
482.671	81.5585	6013.9	7	1000000039
466.335	172.906	6015.08	7	1000000045
479.324	176.065	6014.72	7	1000000040
506.94	203.336	6015.2	7	1000000322
479.441	206.064	6015.81	7	1000000046
457.062	68.8118	6017.69	7	1000000050
506.94	3.97666	6019.83	7	1000000332
471.736	13.1191	6019.12	7	1000000047
451.024	38.5205	6018.72	7	1000000048
430.316	68.4673	6019.31	7	1000000051
470.68	137.211	6018.17	7	1000000042
480.775	147.497	6018.3	7	1000000044
423.127	184.901	6020.19	7	1000000054
462.889	26.6975	6021.77	7	1000000043
431.291	57.8832	6021.06	7	1000000049
455.167	114.654	6021.13	7	1000000064
506.94	168.474	6021.05	7	1000000323
462.428	235.775	6020.31	7	1000000056
452.04	245.213	6022.08	7	1000000285
445.192	16.2213	6024.6	7	1000000314
306.216	81.2352	6023.31	7	1000000074
431.186	156.567	6024.69	7	1000000069
424.023	212.792	6024.03	7	1000000055
412.172	21.8047	6025.83	7	1000000060
490.518	86.9119	6026.24	7	1000000283
493.408	145.257	6025.91	7	1000000068
453.036	155.934	6025.91	7	1000000058
452.571	166.723	6024.85	7	1000000053
255.667	232.309	6024.95	7	1000000081
370.6	250.638	6026.74	7	1000000144
369.491	30.1029	6028.59	7	1000000061
325.103	54.6341	6028.52	7	1000000071
394.137	69.0729	6027.95	7	1000000062
265.826	72.5975	6027.89	7	1000000075
261.753	96.3978	6028.36	7	1000000065
256.517	11.5824	6030.42	7	1000000333
322.046	43.7357	6030.66	7	1000000182
274.373	55.7417	6030.94	7	1000000188
342.874	63.7685	6030.85	7	1000000190
506.94	67.5879	6030.82	7	1000000312
333.746	95.2004	6029.68	7	1000000083
469.206	105.867	6029.15	7	1000000063
380.219	109.458	6030.17	7	1000000286
493.762	115.43	6029.53	7	1000000052
314.54	126.784	6031.07	7	1000000085
342.142	130.352	6029.21	7	1000000086
413.869	136.198	6031.04	7	1000000072
365.087	144.822	6030.31	7	1000000073
320.195	164.217	6030.61	7	1000000087
435.319	246.051	6031.15	7	1000000093
392.07	104.812	6032.58	7	1000000084
288.915	113.662	6032.46	7	1000000192
445.796	125.525	6032.6	7	1000000066
363.44	132.221	6033.26	7	1000000067
375.423	183.002	6032.2	7	1000000194
434.021	207.969	6032.32	7	1000000078
340.403	213.036	6032.91	7	1000000076
432.696	230.919	6032.82	7	1000000070
23.2651	261.211	6013.59	7	1000000005
140.78	326.168	6013.42	7	1000000096
191.875	353.617	6017.42	7	1000000095
227.997	279.828	6021.71	7	1000000101
192.606	331.696	6021	7	1000000099
214.729	354.445	6020.69	7	1000000097
169.783	441.839	6021.53	7	1000000102
59.151	274.327	6024.06	7	1000000100
119.647	280.148	6023.28	7	1000000107
242.702	409.522	6025.94	7	1000000147
250.562	456.276	6030.28	7	1000000264
126.802	491.092	6030.44	7	1000000300
33.3295	260.557	6032.97	7	1000000251
224.296	263.63	6031.86	7	1000000106
193.458	371.252	6032.63	7	1000000334
231.427	411.817	6033.18	7	1000000104
491.227	486.724	6004.41	7	1000000111
483.494	431.335	6010.64	7	1000000115
483.577	479.192	6009.93	7	1000000110
500.519	397.13	6012.94	7	1000000335
498.76	268.325	6015.57	7	1000000116
476.154	349.942	6014.57	7	1000000112
470.676	412.953	6014.73	7	1000000113
499.819	281.929	6016.25	7	1000000302
447.958	360.326	6017.05	7	1000000119
485.976	380.622	6016.94	7	1000000120
469.62	273.082	6019.47	7	1000000117
485.118	291.047	6019.58	7	1000000118
404.987	328.007	6018.26	7	1000000129
341.157	346.134	6019.1	7	1000000146
469.877	344.964	6018.39	7	1000000125
459.465	415.737	6018.89	7	1000000114
435.994	421.129	6019.72	7	1000000121
444.753	288.9	6020.53	7	1000000123
474.406	294.984	6022.02	7	1000000128
436.398	316.631	6020.55	7	1000000124
493.359	323.87	6021.83	7	1000000301
422.601	343.439	6021.16	7	1000000134
380.19	375.539	6022.17	7	1000000136
393.229	385.629	6020.92	7	1000000135
461.647	390.719	6021.74	7	1000000126
389.077	396.355	6020.97	7	1000000130
447.298	401.749	6021.76	7	1000000292
461.311	260.412	6023.22	7	1000000122
427.395	281.083	6024.22	7	1000000131
363.92	307.4	6024.22	7	1000000138
344.563	468.836	6023.64	7	1000000287
446.078	301.913	6026.42	7	1000000145
477.631	307.982	6025.67	7	1000000139
492.414	388.743	6025.23	7	1000000140
265.986	316.471	6028.01	7	1000000149
371.994	340.336	6028.02	7	1000000133
503.892	346.055	6027.83	7	1000000313
332.324	376.401	6026.92	7	1000000150
340.149	406.652	6027.73	7	1000000127
393.507	423.356	6027.13	7	1000000143
408.759	424.007	6026.97	7	1000000137
399.327	293.342	6030.26	7	1000000141
333.984	296.91	6030.17	7	1000000148
343.614	253.516	6033.28	7	1000000151
404.254	275.336	6031.88	7	1000000132
381.949	290.404	6031.82	7	1000000294
382.051	309.861	6032.44	7	1000000325
334.821	314.392	6031.63	7	1000000265
430.052	321.589	6032.63	7	1000000142
406.359	359.206	6033.36	7	1000000266
240.458	81.7667	6035.29	7	1000000189
210.362	147.215	6034.33	7	1000000032
116.726	219.91	6035.29	7	1000000026
235.658	102.409	6037.19	7	1000000092
224.361	112.829	6035.88	7	1000000031
162.114	120.36	6037.25	7	1000000167
239.882	137.258	6036.29	7	1000000161
165.246	144.755	6037.77	7	1000000033
157.674	190.453	6036.29	7	1000000172
186.193	95.2993	6039.03	7	1000000303
249.449	97.4404	6038.98	7	1000000211
60.2693	108.895	6038.81	7	1000000163
181.301	37.3946	6040.9	7	1000000162
142.176	56.5464	6040.94	7	1000000159
110.99	119.944	6042.12	7	1000000171
206.439	136.314	6041.64	7	1000000166
[truncated: 61,392 more rows]

## Sheet: embryo-1-Posterior
Position
Position X	Position Y	Position Z	Time	TrackID
198.037	6.56426	5993.33	1	1000000000
72.4567	42.5596	5993.03	1	1000000001
142.118	19.662	5997.02	1	1000000002
215.122	18.9744	5999.08	1	1000000003
104.109	68.0787	6001.22	1	1000000004
178.291	151.432	6001.44	1	1000000005
72.2929	172.957	6003.87	1	1000000006
82.9083	45.97	6006.56	1	1000000007
199.144	93.1628	6005.73	1	1000000008
187.234	142.46	6005.38	1	1000000009
115.67	131.113	6010.67	1	1000000010
221.801	136.706	6009.99	1	1000000011
156.04	154.675	6010.31	1	1000000012
167.373	207.859	6010.37	1	1000000013
158.806	228.418	6010.05	1	1000000014
206.695	191.955	6012.79	1	1000000015
161.486	127.619	6015.43	1	1000000016
237.065	168.218	6015.45	1	1000000017
69.4826	92.6625	6016.06	1	1000000018
99.5545	163.979	6019.41	1	1000000019
248.398	225.496	6018.5	1	1000000020
209.242	88.0219	6021.5	1	1000000021
211.939	127.161	6020.3	1	1000000022
245.867	136.256	6023.82	1	1000000023
249.354	175.309	6023.19	1	1000000024
129.06	222.258	6022.58	1	1000000025
284.006	-5.96046e-08	5999.31	1	1000000026
254.303	21.425	6001.85	1	1000000027
378.147	33.6515	6001.69	1	1000000028
370.084	96.2197	6001.67	1	1000000029
372.985	-5.96046e-08	6003.52	1	1000000030
375.154	64.7567	6003.41	1	1000000031
474.619	102.342	6004.35	1	1000000032
292.285	11.6599	6007.08	1	1000000033
423.975	69.328	6005.68	1	1000000034
426.818	102.206	6005.8	1	1000000035
374.107	111.837	6005.87	1	1000000036
485.539	29.6679	6008.65	1	1000000037
446.149	41.6232	6008.45	1	1000000038
487.528	77.3868	6008.66	1	1000000039
383.01	81.4997	6008.68	1	1000000040
440.716	105.608	6007.63	1	1000000041
285.718	131.708	6007.35	1	1000000042
379.532	23.2011	6009.37	1	1000000043
374.043	95.0697	6010.76	1	1000000044
389.813	192.94	6011.34	1	1000000045
417.055	-5.96046e-08	6013.27	1	1000000046
323.372	55.6642	6012.66	1	1000000047
356.226	72.7136	6012.54	1	1000000048
417.828	87.4009	6012.52	1	1000000049
296.503	105.883	6012.34	1	1000000050
316.536	123.364	6012.9	1	1000000051
473.486	129.658	6013.6	1	1000000052
406.707	17.9258	6014.59	1	1000000053
462.025	44.3022	6014.94	1	1000000054
307.683	58.3728	6015.58	1	1000000055
460.691	73.5032	6014.42	1	1000000056
260.052	80.8135	6014.55	1	1000000057
331.66	91.9457	6014.54	1	1000000058
479.359	110.676	6013.74	1	1000000059
413.501	138.087	6015.23	1	1000000060
351.769	151.155	6015.52	1	1000000061
379.843	160.664	6015.46	1	1000000062
332.815	61.9716	6017.99	1	1000000063
286.823	118.966	6016.86	1	1000000064
417.199	245.888	6017.59	1	1000000065
404.266	54.7235	6019.16	1	1000000066
268.868	65.4159	6019.46	1	1000000067
389.999	85.3567	6019.2	1	1000000068
423.258	89.7087	6018.46	1	1000000069
390.256	105.705	6019.04	1	1000000070
367.703	208.18	6018.36	1	1000000071
341.758	34.6712	6022.49	1	1000000072
307.934	42.7826	6022.46	1	1000000073
424.146	110.693	6021.45	1	1000000074
495.481	169.504	6022.13	1	1000000075
483.813	206.437	6021.76	1	1000000076
428.721	239.422	6022.05	1	1000000077
300.341	19.6433	6024.48	1	1000000078
315.197	93.0471	6022.78	1	1000000079
379.095	108.295	6023.05	1	1000000080
257.279	113.14	6023.95	1	1000000081
496.489	224.151	6023.96	1	1000000082
326.186	226.082	6023.04	1	1000000083
74.2624	354.712	5999.89	1	1000000084
145.689	301.068	6005.67	1	1000000085
160.21	320.551	6008.24	1	1000000086
178.127	432.063	6008.89	1	1000000087
139.789	391.555	6011.07	1	1000000088
131.168	299.14	6011.89	1	1000000089
221.428	393.5	6012.58	1	1000000090
155.162	428.199	6011.75	1	1000000091
195.638	365.499	6014.47	1	1000000092
222.86	407.21	6014.97	1	1000000093
190.042	418.883	6015.36	1	1000000094
230.091	433.967	6015.57	1	1000000095
152.903	466.673	6014.67	1	1000000096
145.866	474.155	6015.09	1	1000000097
173.747	260.361	6016.6	1	1000000098
214.072	282.623	6016.8	1	1000000099
238.533	292.874	6017.28	1	1000000100
222.39	327.167	6016.16	1	1000000101
116.716	443.381	6017.19	1	1000000102
131.488	506.94	6016.17	1	1000000103
156.516	325.969	6019.9	1	1000000104
69.1958	462.005	6021.21	1	1000000105
181.977	311.505	6023.17	1	1000000106
217.776	480.568	6023.23	1	1000000107
492.315	321.33	6014.86	1	1000000108
485.28	278.449	6016.75	1	1000000109
497.853	335.65	6016.11	1	1000000110
351.803	383.905	6016.89	1	1000000111
261.158	346.589	6020.12	1	1000000112
501.356	424.929	6018.86	1	1000000113
436.527	265.113	6021.81	1	1000000114
474.404	368.567	6021.01	1	1000000115
421.461	413.345	6022.13	1	1000000116
395.965	446.54	6022.04	1	1000000117
437.766	362.4	6024.64	1	1000000118
392.501	468.491	6023.58	1	1000000119
197.148	248.023	6025.44	1	1000000120
191.434	98.0206	6027.1	1	1000000121
213.538	175.723	6030.24	1	1000000122
39.585	210.265	6033.44	1	1000000123
243.968	250.484	6038.48	1	1000000124
235.379	138.882	6041.36	1	1000000125
248.312	154.41	6041.32	1	1000000126
195.654	218.334	6041.65	1	1000000127
251.4	236.123	6041.67	1	1000000128
223.111	153.942	6042.95	1	1000000129
178.137	252.502	6043.4	1	1000000130
240.205	199.087	6044.56	1	1000000131
247.442	164.454	6047.89	1	1000000132
366.134	33.183	6025.35	1	1000000133
296.543	96.7243	6026.83	1	1000000134
277.022	121.947	6025.05	1	1000000135
466.593	205.722	6026.56	1	1000000136
273.353	244.719	6025.94	1	1000000137
338.035	78.5204	6028.7	1	1000000138
428.856	135.554	6028.17	1	1000000139
354.16	218.75	6028.81	1	1000000140
285.587	27.4668	6031.18	1	1000000141
356.076	139.855	6032.39	1	1000000142
318.647	231.296	6032.77	1	1000000143
411.311	74.3653	6034.49	1	1000000144
374.444	182.745	6034.51	1	1000000145
441.915	33.3321	6037.05	1	1000000146
438.578	99.4691	6038.38	1	1000000147
420.38	48.5632	6043.67	1	1000000148
264.357	118.175	6042.36	1	1000000149
314.392	123.934	6043.77	1	1000000150
279.723	96.4221	6045.54	1	1000000151
286.322	130.849	6046.14	1	1000000152
304.502	202.291	6044.53	1	1000000153
334.111	235.578	6046.7	1	1000000154
345.273	127.467	6048.56	1	1000000155
341.72	149.801	6048.08	1	1000000156
368.848	128.421	6050.48	1	1000000157
445.133	252.174	6053.49	1	1000000158
222.237	287.811	6025.7	1	1000000159
244.038	305.307	6025.11	1	1000000160
204.811	324.225	6025.46	1	1000000161
85.662	286.488	6027.82	1	1000000162
156.468	290.205	6030.8	1	1000000163
198.23	386.486	6033.94	1	1000000164
123.129	319.524	6036.66	1	1000000165
117.744	355.691	6037.41	1	1000000166
168.7	445.965	6037.23	1	1000000167
143.703	461.515	6036.67	1	1000000168
162.593	357.306	6045.74	1	1000000169
197.321	444.192	6045.6	1	1000000170
317.101	317.596	6025.21	1	1000000171
441.112	328.767	6026.54	1	1000000172
419.53	332.016	6025.71	1	1000000173
460.767	342.611	6025.91	1	1000000174
292.532	356.751	6025.28	1	1000000175
397.611	365.466	6025.4	1	1000000176
284.87	371.832	6025.62	1	1000000177
440.312	397.194	6026.3	1	1000000178
384.403	412.829	6025.92	1	1000000179
461.433	443.553	6025.38	1	1000000180
491.735	476.754	6026.68	1	1000000181
292.55	269.214	6027.45	1	1000000182
375.337	288.069	6028.22	1	1000000183
460.285	356.855	6027.82	1	1000000184
303.613	386.343	6028.72	1	1000000185
372.975	436.447	6028.94	1	1000000186
305.3	313.177	6031.05	1	1000000187
299.551	409.476	6031.16	1	1000000188
288.458	418.502	6030.94	1	1000000189
318.977	339.345	6031.87	1	1000000190
438.039	355.043	6032.65	1	1000000191
335.649	366.93	6033.02	1	1000000192
404.23	433.678	6031.37	1	1000000193
356.82	465.486	6032.62	1	1000000194
273.4	274.747	6034.47	1	1000000195
350.511	274.535	6035.63	1	1000000196
475.408	291.815	6035.56	1	1000000197
402.618	277.746	6035.94	1	1000000198
285.886	436.936	6037.5	1	1000000199
320.029	485.006	6036.51	1	1000000200
506.94	367.34	6038.12	1	1000000201
456.269	326.563	6041.63	1	1000000202
254.463	348.425	6041.52	1	1000000203
477.987	399.801	6041.62	1	1000000204
435.63	326.46	6044	1	1000000205
453.92	443.442	6043.28	1	1000000206
322.862	308.65	6045.51	1	1000000207
386.824	310.314	6046.47	1	1000000208
417.993	334.971	6045.74	1	1000000209
506.94	355.509	6045.56	1	1000000210
317.995	478.403	6045.3	1	1000000211
312.215	318.054	6047.81	1	1000000212
390.08	352.721	6048.25	1	1000000213
392.275	326.818	6049.71	1	1000000214
286.12	373.956	6050.64	1	1000000215
365.236	412.639	6050.03	1	1000000216
387.916	276.464	6053.06	1	1000000217
299.626	369.857	6053.66	1	1000000218
196.248	8.25112	5993.4	2	1000000000
67.5641	48.0631	5991.91	2	1000000001
141.432	17.1197	5997.46	2	1000000002
213.061	21.5343	5998.31	2	1000000003
178.633	154.08	5999.96	2	1000000005
253.335	22.9763	6002.63	2	1000000027
104.508	72.3415	6001.99	2	1000000004
69.1122	174.883	6001.86	2	1000000006
187.592	143.172	6003.73	2	1000000009
78.3606	43.6341	6006.33	2	1000000007
199.1	93.5108	6006.72	2	1000000008
114.249	132.915	6006.42	2	1000000010
216.397	138.816	6008.66	2	1000000011
155.315	226.752	6008.88	2	1000000014
166.65	209.63	6010.34	2	1000000013
66.8224	95.3954	6012.25	2	1000000018
153.98	152.197	6013.07	2	1000000012
237.215	162.694	6013.54	2	1000000017
204.966	192.318	6012.62	2	1000000015
159.218	128.501	6016.36	2	1000000016
96.9788	163.41	6016.67	2	1000000019
208.235	126.389	6018.73	2	1000000022
251.312	225.723	6018.26	2	1000000020
206.922	89.8827	6022.49	2	1000000021
120.742	137.421	6020.78	2	1000000219
246.103	135.768	6024.53	2	1000000023
248.74	173.798	6022.77	2	1000000024
125.378	218.354	6023.2	2	1000000025
192.335	248.15	6023.36	2	1000000120
280.732	-5.96046e-08	5999.4	2	1000000026
379.06	34.3878	6002.22	2	1000000028
368.625	97.8226	6002.1	2	1000000029
371.835	-5.96046e-08	6003.79	2	1000000030
371.979	7.15694	6004.43	2	1000000220
373.193	66.9835	6003.79	2	1000000031
473.581	101.749	6003.78	2	1000000032
290.035	12.007	6006.82	2	1000000033
424.084	69.6103	6005.76	2	1000000034
424.668	104.083	6006.39	2	1000000035
486.025	29.9973	6008.71	2	1000000037
486.43	76.5845	6008.31	2	1000000039
379.589	81.5821	6009.01	2	1000000040
438.833	105.716	6007.69	2	1000000041
373.305	114.06	6007.28	2	1000000036
284.351	133.906	6008.16	2	1000000042
380.548	22.5049	6009.89	2	1000000043
446.566	41.964	6009.81	2	1000000038
298.157	107.889	6009.9	2	1000000050
315.185	124.799	6010.81	2	1000000051
417.807	-5.96046e-08	6013.17	2	1000000046
322.75	57.2968	6011.91	2	1000000047
459.397	73.1622	6012.97	2	1000000056
412.163	88.7039	6012.96	2	1000000049
372.948	92.773	6012.54	2	1000000044
476.796	110.765	6012.78	2	1000000059
472.934	132.129	6012.94	2	1000000052
390.44	194.722	6012.37	2	1000000045
407.198	17.906	6015.19	2	1000000053
463.468	42.6673	6015.63	2	1000000054
353.97	71.3702	6013.83	2	1000000048
255.737	82.7829	6014.91	2	1000000057
329.8	92.2483	6015.11	2	1000000058
412.208	139.046	6015.79	2	1000000060
347.99	150.374	6015.49	2	1000000061
403.865	55.7817	6017.35	2	1000000066
305.481	58.7426	6016.64	2	1000000055
267.613	65.8858	6017.13	2	1000000067
390.473	105.852	6016.92	2	1000000070
287.499	117.377	6017.06	2	1000000064
378.42	160.602	6016	2	1000000062
393.654	85.9532	6019.38	2	1000000068
421.519	89.029	6019.21	2	1000000069
370.674	206.028	6019.44	2	1000000071
417.033	247.383	6018.43	2	1000000065
300.308	20.8697	6022.37	2	1000000078
333.445	62.0465	6020.84	2	1000000063
376.786	107.211	6021.12	2	1000000080
254.574	110.403	6021.71	2	1000000081
493.553	175.229	6022.37	2	1000000075
481.789	208.461	6022.41	2	1000000076
325.342	225.17	6022.02	2	1000000083
493.507	226.828	6021.56	2	1000000082
340.238	34.7375	6022.63	2	1000000072
308.172	43.9005	6024.22	2	1000000073
313.368	94.6774	6023.3	2	1000000079
423.69	110.043	6022.73	2	1000000074
465.61	207.273	6023.85	2	1000000136
426.958	239.902	6023.01	2	1000000077
72.5385	354.828	6000.99	2	1000000084
143.377	303.73	6003.74	2	1000000085
160.772	323.488	6007.25	2	1000000086
174.999	435.17	6008.96	2	1000000087
128.652	299.557	6010.5	2	1000000089
138.109	390.825	6010.44	2	1000000088
150.241	432.88	6011.44	2	1000000091
172.737	262.856	6013.69	2	1000000098
213.223	286.676	6013.7	2	1000000099
201.937	368.388	6012.53	2	1000000092
149.121	463.038	6013.04	2	1000000096
224.443	397.44	6013.91	2	1000000090
186.166	419.379	6014.49	2	1000000094
145.263	477.772	6015.39	2	1000000097
236.282	294.379	6016.04	2	1000000100
222.495	325.358	6017.18	2	1000000101
223.057	409.014	6016.61	2	1000000093
233.475	436.328	6017.61	2	1000000095
113.79	443.31	6017.28	2	1000000102
131.379	506.94	6017.32	2	1000000103
181.658	310.941	6021.43	2	1000000106
155.873	328.2	6020.55	2	1000000104
70.1145	460.932	6020.78	2	1000000105
127.16	316.622	6023.98	2	1000000221
216.63	484.301	6024.15	2	1000000107
490.822	322.371	6014.94	2	1000000108
484.195	278.036	6016.61	2	1000000109
498.791	337.949	6016.75	2	1000000110
349.085	385.997	6016.56	2	1000000111
263.065	344.868	6019.26	2	1000000112
498.302	424.556	6020.09	2	1000000113
475.572	367.043	6022.45	2	1000000115
421.53	415.707	6021.54	2	1000000116
395.403	452.131	6022.16	2	1000000117
432.596	266.597	6022.99	2	1000000114
292.768	268.812	6024.01	2	1000000182
390.059	468.249	6024.49	2	1000000119
213.795	173.741	6028.18	2	1000000122
189.951	97.7348	6030.2	2	1000000121
35.8976	210.055	6034.49	2	1000000123
244.371	248.443	6037.59	2	1000000124
233.536	137.543	6041.24	2	1000000125
225.46	151.547	6041.77	2	1000000129
193.865	220.702	6040.91	2	1000000127
245.051	153.315	6042.48	2	1000000126
250.436	239.296	6042.58	2	1000000128
237.699	199.059	6044.84	2	1000000131
178.149	250.186	6044.85	2	1000000130
249.125	161.799	6047.36	2	1000000132
366.231	35.5567	6026.71	2	1000000133
351.614	217.537	6026.19	2	1000000140
271.604	244.913	6026.86	2	1000000137
336.741	79.1504	6028.78	2	1000000138
290.859	96.4831	6028.15	2	1000000134
427.068	139.011	6029.81	2	1000000139
319.852	233.609	6030.31	2	1000000143
353.182	140.048	6033.05	2	1000000142
440.399	34.1149	6035.08	2	1000000146
409.978	74.7897	6034.48	2	1000000144
435.637	84.6972	6034.64	2	1000000222
286.55	28.3795	6035.94	2	1000000141
375.925	181.367	6036.29	2	1000000145
438.013	101.251	6038.25	2	1000000147
506.94	220.31	6039.09	2	1000000223
262.403	117.331	6043.42	2	1000000149
418.162	47.193	6044.67	2	1000000148
274.969	98.8981	6044.99	2	1000000151
311.483	121.237	6045.04	2	1000000150
344.084	125.743	6045.93	2	1000000155
284.075	130.503	6045.58	2	1000000152
337.175	148.339	6044.97	2	1000000156
304.913	202.274	6044.72	2	1000000153
371.832	127.647	6050.16	2	1000000157
443.461	253.265	6053.57	2	1000000158
220.583	288.727	6025.71	2	1000000159
242.066	306.044	6025.11	2	1000000160
203.087	322.157	6026.9	2	1000000161
84.2268	284.683	6029.76	2	1000000162
151.364	288.794	6029.42	2	1000000163
194.224	387.143	6031.48	2	1000000164
121.429	320.154	6035.53	2	1000000165
140.896	462.704	6033.93	2	1000000168
116.012	353.84	6036.47	2	1000000166
169.105	444.33	6037.01	2	1000000167
250.238	354.706	6045.22	2	1000000203
156.688	357.55	6045.77	2	1000000169
196.865	443.502	6046.68	2	1000000170
316.055	314.831	6025.18	2	1000000171
419.369	331.52	6026.64	2	1000000173
437.062	364.215	6025.64	2	1000000118
395.495	368.89	6025.32	2	1000000176
285.464	373.215	6026.53	2	1000000177
439.754	398.66	6026.65	2	1000000178
383.927	414.66	6025.55	2	1000000179
288.512	418.796	6026.87	2	1000000189
460.646	445.27	6026.85	2	1000000180
374.89	289.7	6027.38	2	1000000183
437.047	331.035	6028.32	2	1000000172
461.557	344.554	6028.22	2	1000000174
458.472	355.931	6027.52	2	1000000184
292.526	357.94	6026.95	2	1000000175
302.362	385.201	6027.78	2	1000000185
369.398	439.407	6027.99	2	1000000186
491.405	477.876	6028.04	2	1000000181
401.806	435.875	6029.6	2	1000000193
297.352	272.279	6032.08	2	1000000224
304.896	312.919	6031.99	2	1000000187
316.535	337.948	6031.71	2	1000000190
300.476	411.682	6033.15	2	1000000188
352.454	468.78	6032.58	2	1000000194
271.791	275.589	6034.13	2	1000000195
401.274	278.901	6034.46	2	1000000198
473.055	292.645	6033.57	2	1000000197
436.094	356.31	6034.56	2	1000000191
335.773	368.398	6033.52	2	1000000192
453.916	443.001	6035.55	2	1000000206
351.557	273.742	6037.13	2	1000000196
315.976	485.246	6036.84	2	1000000200
286.727	438.716	6039.83	2	1000000199
321.41	309.464	6042.11	2	1000000207
455.402	325.489	6041.53	2	1000000202
432.605	328.733	6042.68	2	1000000205
506.94	354.193	6044.39	2	1000000210
479.44	401.955	6042.86	2	1000000204
418.881	464.714	6046.41	2	1000000225
383.58	313.841	6048.44	2	1000000208
310.355	318.749	6047.99	2	1000000212
388.094	329.267	6047.13	2	1000000214
415.612	337.544	6046.74	2	1000000209
364.15	412.757	6048.54	2	1000000216
385.122	355.727	6050.78	2	1000000213
283.416	373.335	6050.28	2	1000000215
378.321	276.242	6052.5	2	1000000217
300.036	370.024	6053.15	2	1000000218
64.0287	51.1397	5990.6	3	1000000001
192.857	7.58045	5993.67	3	1000000000
138.349	15.7963	5998.2	3	1000000002
252.674	21.9653	6000.48	3	1000000027
210.504	23.4694	5999.3	3	1000000003
177.296	155.056	5999.91	3	1000000005
68.3644	174.924	6001.05	3	1000000006
74.6948	38.5978	6004.39	3	1000000007
103.931	73.447	6003.05	3	1000000004
186.288	144.209	6003.83	3	1000000009
111.774	131.401	6006.47	3	1000000010
63.8936	97.2836	6008.1	3	1000000018
209.203	141.557	6007.83	3	1000000011
166.588	212.679	6008.91	3	1000000013
200.917	95.6113	6010.11	3	1000000008
152.18	224.561	6009.47	3	1000000014
252.303	82.3211	6013.12	3	1000000057
236.268	159.076	6013.12	3	1000000017
204.196	193.323	6012.75	3	1000000015
95.8767	61.9548	6014.75	3	1000000226
152.447	151.813	6014.18	3	1000000012
93.6295	164.421	6015.46	3	1000000019
153.696	128.151	6017.54	3	1000000016
116.155	139.193	6016.99	3	1000000219
251.359	109.543	6020.02	3	1000000081
202.981	129.568	6018.58	3	1000000022
209.67	164.244	6021.79	3	1000000227
245.563	175.879	6020.61	3	1000000024
252.611	223.098	6020.97	3	1000000020
191.273	248.739	6021.21	3	1000000120
124.79	220.181	6023.88	3	1000000025
277.751	-5.96046e-08	6000.15	3	1000000026
368.615	99.8042	6002.46	3	1000000029
373.225	-5.96046e-08	6004.27	3	1000000030
379.014	36.0945	6003.2	3	1000000028
373.299	68.4781	6004.39	3	1000000031
471.188	101.879	6004.63	3	1000000032
370.172	9.54444	6005.99	3	1000000220
423.887	70.6831	6006.12	3	1000000034
373.3	116.318	6006.74	3	1000000036
284.326	134.693	6006.63	3	1000000042
286.482	11.5826	6009.15	3	1000000033
487.546	30.434	6008.11	3	1000000037
484.904	77.7729	6009.3	3	1000000039
378.047	81.9126	6008.41	3	1000000040
422.337	105.418	6008.14	3	1000000035
437.63	107.311	6008.39	3	1000000041
446.296	41.9114	6010.65	3	1000000038
297.927	108.769	6009.71	3	1000000050
313.952	127.957	6009.84	3	1000000051
378.448	23.443	6013.22	3	1000000043
320.175	58.5911	6012.76	3	1000000047
372.464	92.9009	6013.09	3	1000000044
472.762	111.21	6011.64	3	1000000059
389.382	197.219	6012.59	3	1000000045
414.983	-5.96046e-08	6014.91	3	1000000046
353.567	70.2008	6015.73	3	1000000048
457.852	72.6215	6014.41	3	1000000056
330.487	88.2972	6014.87	3	1000000058
407.655	88.0633	6015.19	3	1000000049
388.182	107.127	6014.09	3	1000000070
471.804	132.924	6015.33	3	1000000052
344.929	151.229	6015.24	3	1000000061
379.293	164.409	6015.7	3	1000000062
461.714	43.5413	6017.18	3	1000000054
402.938	56.0235	6018.08	3	1000000066
265.445	65.2003	6017.36	3	1000000067
287.273	117.822	6017.84	3	1000000064
409.8	139.255	6016.08	3	1000000060
417.007	250.617	6017.83	3	1000000065
401.734	15.8434	6019.72	3	1000000053
304.708	61.8324	6018.75	3	1000000055
393.885	87.9157	6019.96	3	1000000068
371.029	205.976	6019.6	3	1000000071
302.802	21.9535	6022.08	3	1000000078
338.235	34.5613	6021.75	3	1000000072
420.165	89.7951	6020.94	3	1000000069
276.162	124.705	6021.83	3	1000000135
490.555	175.971	6021.92	3	1000000075
464.81	206.483	6021.12	3	1000000136
492.064	227.806	6020.92	3	1000000082
424.281	240.422	6022.23	3	1000000077
331.113	63.4947	6023.57	3	1000000063
375.94	106.282	6022.55	3	1000000080
477.423	208.332	6023.46	3	1000000076
69.1586	354.609	6001.17	3	1000000084
140.778	305.547	6004.25	3	1000000085
158.082	325.754	6006.49	3	1000000086
125.738	297.001	6008.97	3	1000000089
170.393	266.086	6011.4	3	1000000098
136.329	393.028	6009.71	3	1000000088
148.554	434.401	6010.47	3	1000000091
173.932	436.574	6009.4	3	1000000087
145.654	463.421	6011.08	3	1000000096
212.051	289.607	6012.57	3	1000000099
203.236	370.033	6012.97	3	1000000092
232.614	297.836	6015.88	3	1000000100
227.04	399.831	6015.02	3	1000000090
185.88	418.134	6015.79	3	1000000094
112.262	443.662	6015.8	3	1000000102
143.256	480.669	6014.99	3	1000000097
222.822	410.284	6016.63	3	1000000093
130.312	506.94	6017.43	3	1000000103
219.924	324.104	6019.64	3	1000000101
235.001	436.346	6018.88	3	1000000095
181.177	312.702	6021.13	3	1000000106
152.527	326.752	6020.33	3	1000000104
74.3919	463.662	6021.24	3	1000000105
219.057	489.974	6023.61	3	1000000107
488.671	320.624	6014.88	3	1000000108
506.94	348.472	6014.22	3	1000000228
480.379	280.623	6017.31	3	1000000109
494.358	338.492	6017.77	3	1000000110
346.315	387.711	6017.88	3	1000000111
259.928	344.282	6018.77	3	1000000112
494.761	425.355	6020.02	3	1000000113
501.233	429.25	6018.66	3	1000000229
429.168	267.702	6022.14	3	1000000114
294.599	269.734	6022.38	3	1000000182
419.66	417.539	6021.88	3	1000000116
396.993	456.75	6021.96	3	1000000117
473.008	366.752	6023.18	3	1000000115
391.05	375.254	6023.79	3	1000000176
242.53	134.913	6024.83	3	1000000023
105.971	166.981	6026.32	3	1000000230
205.076	92.1276	6028.19	3	1000000021
211.334	172.383	6028	3	1000000122
38.3326	206.669	6034.7	3	1000000123
188.84	99.6309	6036.4	3	1000000121
243.049	249.456	6036.02	3	1000000124
230.433	135.402	6042.03	3	1000000125
221.981	152.37	6041.94	3	1000000129
192.99	223.144	6040.77	3	1000000127
251.237	238.614	6042.18	3	1000000128
240.487	156.323	6043.12	3	1000000126
236.616	200.068	6042.77	3	1000000131
176.38	247.979	6045.35	3	1000000130
248.389	160.653	6047.58	3	1000000132
307.56	42.9915	6026.39	3	1000000073
310.913	95.0888	6025.43	3	1000000079
421.691	110.01	6025.34	3	1000000074
345.46	218.527	6025.07	3	1000000140
323.815	222.675	6026.48	3	1000000083
269.444	245.155	6026.34	3	1000000137
288.534	95.3573	6028.45	3	1000000134
366.227	36.5258	6031.27	3	1000000133
337.526	75.622	6030.31	3	1000000138
320.103	234.612	6030.77	3	1000000143
437.342	85.8201	6033.07	3	1000000222
423.816	141.137	6031.61	3	1000000139
439.795	35.458	6034.46	3	1000000146
410.232	74.7983	6033.98	3	1000000144
350.703	140.809	6034.7	3	1000000142
374.354	180.978	6035.62	3	1000000145
285.484	26.7069	6037.82	3	1000000141
436.768	98.9878	6038.29	3	1000000147
506.94	220.936	6039.22	3	1000000223
273.3	100.72	6042.24	3	1000000151
307.707	203.543	6043.43	3	1000000153
261.304	118.143	6045.62	3	1000000149
310.913	117.472	6045.93	3	1000000150
341.745	124.891	6046.02	3	1000000155
282.184	130.382	6044.67	3	1000000152
335.383	143.626	6046.34	3	1000000156
474.524	211.88	6044.68	3	1000000231
416.659	46.9487	6048.27	3	1000000148
372.745	127.751	6052.52	3	1000000157
220.594	289.026	6025.26	3	1000000159
150.086	286.292	6028.52	3	1000000163
239.155	306.614	6027.76	3	1000000160
198.583	320.718	6028.28	3	1000000161
191.721	389.258	6027.93	3	1000000164
120.327	319.686	6032	3	1000000165
82.3722	278.097	6034.74	3	1000000162
112.316	351.975	6035.11	3	1000000166
137.055	462.656	6034.76	3	1000000168
171.818	443.426	6036.3	3	1000000167
152.453	354.933	6047.06	3	1000000169
247.385	356.935	6048.44	3	1000000203
196.242	442.129	6049.24	3	1000000170
315.126	312.451	6025.3	3	1000000171
454.866	355.925	6026.69	3	1000000184
290.981	359.886	6026.82	3	1000000175
436.835	368.363	6025.52	3	1000000118
301.623	383.428	6025.81	3	1000000185
382.119	415.235	6026.46	3	1000000179
284.911	421.755	6026.3	3	1000000189
456.296	448.381	6025.55	3	1000000180
384.101	468.677	6024.92	3	1000000119
373.964	289.925	6028.2	3	1000000183
417.751	332.319	6028.01	3	1000000173
433.937	332.384	6027.86	3	1000000172
458.515	345.135	6028.02	3	1000000174
282.415	374.942	6028	3	1000000177
436.847	398.282	6027.52	3	1000000178
400.088	437.341	6028.17	3	1000000193
367.7	441.918	6028.46	3	1000000186
433.378	359.123	6030.7	3	1000000191
349.714	471.642	6030.4	3	1000000194
490.942	481.892	6029.94	3	1000000181
471.053	292.713	6033.39	3	1000000197
316.772	336.799	6033.02	3	1000000190
297.1	271.146	6034.08	3	1000000224
269.71	274.102	6034.88	3	1000000195
398.506	282.405	6034.03	3	1000000198
305.36	312.918	6034.31	3	1000000187
333.9	369.507	6034.12	3	1000000192
300.501	412.396	6033.84	3	1000000188
453.76	444.144	6034.79	3	1000000206
454.935	324.647	6036.29	3	1000000202
312.234	485.412	6035.86	3	1000000200
352.425	275.352	6039.48	3	1000000196
321.148	309.505	6039.46	3	1000000207
506.94	373.735	6038	3	1000000201
289.547	437.09	6040.52	3	1000000199
429.249	331.53	6043.95	3	1000000205
413.337	339.886	6045.6	3	1000000209
506.94	353.713	6044.98	3	1000000210
477.266	404.284	6045.11	3	1000000204
415.759	464.768	6045.57	3	1000000225
313.671	478.498	6044.85	3	1000000211
306.053	317.409	6048.82	3	1000000212
385.482	330.423	6047.05	3	1000000214
336.199	412.087	6047.65	3	1000000232
362.332	412.619	6046.92	3	1000000216
379.436	319.727	6049.46	3	1000000208
380.12	359.432	6050.81	3	1000000213
274.847	370.712	6052.64	3	1000000215
442.522	254.946	6053.87	3	1000000158
373.972	274.171	6053.98	3	1000000217
295.272	365.435	6054.9	3	1000000218
64.314	54.4674	5990.6	4	1000000001
190.781	8.70794	5995.51	4	1000000000
136.107	14.3502	5999.8	4	1000000002
176.693	156.976	5999.45	4	1000000005
250.639	22.4511	6000.8	4	1000000027
207.934	24.0149	6000.61	4	1000000003
68.7531	174.638	6001.41	4	1000000006
73.8253	36.9889	6002.86	4	1000000007
63.3889	97.475	6003.69	4	1000000018
185.114	145.095	6003.67	4	1000000009
107.083	72.6155	6005.58	4	1000000004
110.248	132.258	6005.43	4	1000000010
205.149	142.094	6008.02	4	1000000011
167.093	214.29	6009.6	4	1000000013
150.925	221.044	6010.95	4	1000000014
249.16	83.1644	6012.9	4	1000000057
200.86	95.7419	6013.13	4	1000000008
204.381	194.021	6012.44	4	1000000015
96.0818	58.5656	6014.63	4	1000000226
112.805	138.606	6014.8	4	1000000219
236.306	154.484	6015.36	4	1000000017
93.5158	164.567	6014.54	4	1000000019
198.361	131.288	6017.71	4	1000000022
251.251	107.991	6020.17	4	1000000081
149.725	126.726	6019.27	4	1000000016
151.089	151.768	6018.13	4	1000000012
251.463	221.903	6019.45	4	1000000020
200.727	158.623	6021.95	4	1000000227
245.596	174.708	6020.35	4	1000000024
190.429	250.358	6020.46	4	1000000120
241.744	130.892	6024.49	4	1000000023
127.917	225.157	6023	4	1000000025
275.537	-5.96046e-08	6000.26	4	1000000026
369.188	101.391	6002.26	4	1000000029
373.154	-5.96046e-08	6003.82	4	1000000030
368.654	11.1554	6004.2	4	1000000220
375.568	35.7845	6002.77	4	1000000028
372.069	68.9517	6004.6	4	1000000031
423.072	72.2166	6006.29	4	1000000034
471.491	101.864	6005.16	4	1000000032
374.614	116.751	6006.79	4	1000000036
283.344	137.042	6006.41	4	1000000042
488.312	31.8643	6007.15	4	1000000037
373.172	81.2068	6007.94	4	1000000040
420.838	105.666	6008.01	4	1000000035
283.839	11.4936	6009.84	4	1000000033
446.739	42.1709	6010.53	4	1000000038
271.849	67.4337	6010.51	4	1000000233
484.497	78.199	6009.97	4	1000000039
506.94	81.6601	6010.71	4	1000000234
388.024	106.516	6011.13	4	1000000070
296.086	110.605	6010.28	4	1000000050
470.652	113.238	6010.01	4	1000000059
311.006	129.025	6010.35	4	1000000051
377.321	23.451	6012.51	4	1000000043
320.437	57.9152	6012.69	4	1000000047
331.922	84.7626	6013.61	4	1000000058
433.957	108.993	6011.84	4	1000000041
387.128	197.077	6012.19	4	1000000045
456.634	68.5371	6014.92	4	1000000056
406.289	88.0485	6014.42	4	1000000049
372.293	92.1998	6013.95	4	1000000044
408.947	138.458	6015.47	4	1000000060
415.058	1.46356	6016.11	4	1000000046
401.633	56.9757	6016.87	4	1000000066
263.321	63.5608	6017.89	4	1000000067
349.978	67.0585	6016.2	4	1000000048
472.263	133.407	6017.1	4	1000000052
341.685	149.351	6016.91	4	1000000061
377.875	164.108	6016.94	4	1000000062
464.579	208.243	6017.4	4	1000000136
459.706	43.0348	6019.9	4	1000000054
303.071	60.8545	6019.15	4	1000000055
394.998	88.4435	6019.09	4	1000000068
418.203	88.329	6018.43	4	1000000069
287.699	118.119	6018.55	4	1000000064
487.727	177.053	6018.84	4	1000000075
371.232	206.096	6019.1	4	1000000071
490.958	226.749	6019.18	4	1000000082
415.557	250.748	6018.24	4	1000000065
400.438	16.7256	6021.32	4	1000000053
300.701	20.0938	6020.59	4	1000000078
338.113	33.9915	6020.64	4	1000000072
330.189	61.7546	6021.24	4	1000000063
272.842	123.704	6021.89	4	1000000135
388.835	152.734	6022.44	4	1000000235
473.778	212.172	6021.58	4	1000000076
422.066	241.455	6021.5	4	1000000077
373.881	106.108	6022.67	4	1000000080
342.865	215.923	6023.97	4	1000000140
64.6782	353.124	6001.04	4	1000000084
138.053	306.642	6004.66	4	1000000085
156.959	325.18	6006.44	4	1000000086
172.397	438.132	6009.28	4	1000000087
166.844	266.357	6010.48	4	1000000098
209.662	292.622	6011.47	4	1000000099
125.105	294.38	6010.48	4	1000000089
133.678	391.124	6010.14	4	1000000088
146.462	435.347	6009.4	4	1000000091
143.33	464.562	6010.87	4	1000000096
203.989	371.854	6013.46	4	1000000092
230.175	301.674	6014.99	4	1000000100
226.291	403.151	6015.49	4	1000000090
109.286	442.415	6014.45	4	1000000102
141.497	481.52	6016.27	4	1000000097
131.104	499.826	6016.22	4	1000000103
217.017	410.274	6018.27	4	1000000093
185.608	418.031	6018.54	4	1000000094
234.587	436.132	6019.47	4	1000000095
217.992	321.83	6020.31	4	1000000101
150.868	325.914	6020.68	4	1000000104
219.765	288.404	6024	4	1000000159
178.997	310.438	6022.66	4	1000000106
122.082	316.426	6024.41	4	1000000221
77.0736	463.886	6022.92	4	1000000105
486.086	322.99	6014.32	4	1000000108
506.94	352.718	6013.8	4	1000000228
479.44	284.92	6016.14	4	1000000109
501.733	431.815	6016.94	4	1000000229
495.054	340.543	6019.24	4	1000000110
259.833	343.372	6019.15	4	1000000112
341.642	388.969	6020.14	4	1000000111
293.863	266.95	6021.57	4	1000000182
419.174	421.394	6022.23	4	1000000116
493.254	425.012	6021.68	4	1000000113
399.673	458.703	6022.01	4	1000000117
426.24	268.364	6023.56	4	1000000114
471.22	366.202	6022.93	4	1000000115
384.597	379.226	6022.89	4	1000000176
301.115	382.663	6023.45	4	1000000185
451.223	453.773	6022.59	4	1000000236
378.08	467.904	6024.24	4	1000000119
207.115	171.465	6026.36	4	1000000122
107.337	168.145	6027.04	4	1000000230
203.486	95.0347	6033.03	4	1000000021
36.114	200.217	6033.99	4	1000000123
242.505	246.664	6035.13	4	1000000124
186.125	102.527	6037.12	4	1000000121
218.699	152.284	6036.71	4	1000000129
236.56	157.785	6042.12	4	1000000126
250.387	238.083	6042.17	4	1000000128
228.013	133.231	6042.9	4	1000000125
233.817	198.613	6043.19	4	1000000131
189.162	223.071	6042.74	4	1000000127
177.392	245.8	6043.75	4	1000000130
246.142	160.78	6048.04	4	1000000132
307.142	42.3448	6026.82	4	1000000073
420.316	110.011	6026.21	4	1000000074
322.065	220.589	6025.53	4	1000000083
283.474	94.7706	6027.93	4	1000000134
308.062	95.7516	6026.99	4	1000000079
268.314	246.763	6027.92	4	1000000137
438.091	88.1287	6030.95	4	1000000222
506.94	175.065	6030.88	4	1000000237
319.093	238.348	6030.64	4	1000000143
364.066	36.0533	6033.1	4	1000000133
439.48	34.9177	6033.06	4	1000000146
333.868	73.9177	6031.43	4	1000000138
410.071	76.9688	6032.22	4	1000000144
347.931	140.97	6034.26	4	1000000142
420.143	145.022	6034.1	4	1000000139
506.94	224.214	6035.03	4	1000000223
282.262	25.8909	6036.42	4	1000000141
434.951	98.9749	6037.6	4	1000000147
372.824	182.253	6036.68	4	1000000145
471.801	214.129	6038.55	4	1000000231
340.067	124.633	6041.61	4	1000000155
278.222	130.243	6041.75	4	1000000152
267.713	100.14	6042.76	4	1000000151
260.71	116.627	6043.28	4	1000000149
306.766	203.439	6043.32	4	1000000153
327.775	232.149	6043.43	4	1000000154
330.901	143.989	6045.22	4	1000000156
417.844	46.4753	6048.37	4	1000000148
312.703	115.117	6047.31	4	1000000150
376.437	125.729	6050.76	4	1000000157
188.965	390.75	6025.94	4	1000000164
220.864	489.376	6025.3	4	1000000107
236.264	308.493	6027.19	4	1000000160
196.238	320.119	6028.15	4	1000000161
144.339	285.191	6030.77	4	1000000163
118.089	324.661	6030.74	4	1000000165
137.456	463.158	6032.97	4	1000000168
171.858	442.37	6036.75	4	1000000167
79.5997	276.108	6038.45	4	1000000162
106.51	350.644	6038.68	4	1000000166
204.294	426.634	6043.04	4	1000000238
152.287	356.976	6045.7	4	1000000169
246.229	357.19	6046.83	4	1000000203
197.259	442.007	6049.18	4	1000000170
311.935	313.314	6026.11	4	1000000171
433.706	333.363	6026.26	4	1000000172
458.188	341.345	6026.57	4	1000000174
453.625	355.989	6025.86	4	1000000184
280.84	376.849	6026.84	4	1000000177
282.649	424.302	6025.29	4	1000000189
397.291	440.587	6026.2	4	1000000193
371.884	290.009	6028.07	4	1000000183
419.354	336.116	6027.11	4	1000000173
290.716	363.12	6028.74	4	1000000175
436.195	374.496	6027.52	4	1000000118
432.72	401.04	6028.47	4	1000000178
381.191	416.887	6028.17	4	1000000179
430.735	362.677	6030.8	4	1000000191
361.906	445.367	6030.2	4	1000000186
347.157	473.102	6030.68	4	1000000194
486.973	483.618	6030.25	4	1000000181
296.602	269.295	6032	4	1000000224
397.136	283.918	6032.96	4	1000000198
314.583	336.708	6032.25	4	1000000190
501.541	421.735	6033.02	4	1000000239
309.725	484.387	6033.24	4	1000000200
465.081	294.085	6034.88	4	1000000197
331.023	370.478	6034.35	4	1000000192
506.94	377.723	6034.18	4	1000000201
451.19	444.954	6033.8	4	1000000206
267.951	271.862	6036.42	4	1000000195
351.698	277.242	6037.8	4	1000000196
321.572	310.16	6037.36	4	1000000207
454.93	324.403	6035.95	4	1000000202
297.762	411.693	6036.16	4	1000000188
289.685	434.788	6039.43	4	1000000199
506.94	353.721	6041.75	4	1000000210
475.544	405.428	6041.64	4	1000000204
312.935	476.793	6041.75	4	1000000211
383.159	332.233	6045.28	4	1000000214
427.833	335.842	6044.9	4	1000000205
333.112	412.057	6045.63	4	1000000232
361.124	411.485	6046.38	4	1000000216
303.869	317.733	6047.27	4	1000000212
377.229	323.392	6048.6	4	1000000208
378.587	364.082	6048.77	4	1000000213
411.493	467.43	6046.98	4	1000000225
403.235	500.18	6047.64	4	1000000240
408.848	348.313	6048.92	4	1000000209
439.234	256.009	6052.99	4	1000000158
290.761	364.329	6054.2	4	1000000218
268.511	370.321	6054.54	4	1000000215
374.032	269.611	6057.21	4	1000000217
63.9777	57.8718	5990.6	5	1000000001
189.019	9.13973	5995.72	5	1000000000
133.869	13.6638	5998.12	5	1000000002
204.608	24.5273	5999.37	5	1000000003
177.532	158.352	5999.66	5	1000000005
70.956	173.674	6000.01	5	1000000006
249.211	25.8725	6001.96	5	1000000027
72.4867	37.2673	6001.9	5	1000000007
59.8689	97.8535	6001.31	5	1000000018
184.611	147.331	6004.14	5	1000000009
105.584	71.3411	6005.99	5	1000000004
110.333	133.255	6005.55	5	1000000010
204.184	142.718	6008.28	5	1000000011
168.453	217.369	6008.97	5	1000000013
201.098	194.136	6009.85	5	1000000015
150.948	221.194	6010.06	5	1000000014
246.382	81.4902	6012.81	5	1000000057
109.905	139.386	6013.48	5	1000000219
93.2285	57.6755	6014.7	5	1000000226
195.595	131.781	6014.95	5	1000000022
234.736	157.004	6015.89	5	1000000017
93.6553	164.232	6014.78	5	1000000019
198.747	97.0245	6016.42	5	1000000008
149.203	124.094	6018.36	5	1000000016
151.762	151.709	6018.36	5	1000000012
246.722	221.237	6019.31	5	1000000020
195.507	157.042	6021.89	5	1000000227
243.947	175.602	6021.4	5	1000000024
249.282	107.424	6022.58	5	1000000081
106.865	165.186	6022.62	5	1000000230
274.664	-5.96046e-08	6001.8	5	1000000026
376.186	35.8617	6001.88	5	1000000028
373.376	-5.96046e-08	6004.2	5	1000000030
396.44	-5.96046e-08	6002.95	5	1000000241
367.178	11.2125	6004.03	5	1000000220
370.731	69.6376	6003.69	5	1000000031
369.384	103.71	6002.84	5	1000000029
471.816	103.355	6005.97	5	1000000032
373.991	117.652	6005.11	5	1000000036
282.767	138.028	6006.21	5	1000000042
424.821	76.5324	6007.78	5	1000000034
371.205	81.6812	6007.31	5	1000000040
421.263	108.194	6008.12	5	1000000035
283.32	11.2568	6010.24	5	1000000033
375.836	23.8032	6011.23	5	1000000043
486.897	34.9698	6010.78	5	1000000037
446.233	42.4105	6011.11	5	1000000038
270.626	67.0189	6009.98	5	1000000233
484.393	79.5854	6010.59	5	1000000039
506.94	80.267	6010.56	5	1000000234
388.733	108.869	6010.43	5	1000000070
296.538	111.262	6011.06	5	1000000050
469.04	114.902	6010.47	5	1000000059
309.597	130.044	6009.95	5	1000000051
320.842	56.0106	6011.92	5	1000000047
404.125	90.3933	6012.83	5	1000000049
372.203	91.0158	6013.56	5	1000000044
383.936	198.656	6012.57	5	1000000045
414.452	4.61905	6015.3	5	1000000046
401.484	57.97	6015.61	5	1000000066
348.246	65.7011	6015.85	5	1000000048
331.721	83.1905	6013.76	5	1000000058
433.092	112.015	6014.05	5	1000000041
407.874	138.955	6015.67	5	1000000060
264.84	60.5813	6017.8	5	1000000067
457.448	69.3625	6016.19	5	1000000056
417.352	88.8668	6017.75	5	1000000069
377.145	165.789	6017.15	5	1000000062
485.353	178.803	6017.07	5	1000000075
460.482	206.143	6016.27	5	1000000136
488.198	226.467	6016.22	5	1000000082
299.673	21.1066	6018.46	5	1000000078
301.018	60.4026	6018.95	5	1000000055
272.714	124.605	6020.16	5	1000000135
473.277	137.33	6018.3	5	1000000052
339.106	147.114	6018.67	5	1000000061
372.219	204.903	6018.78	5	1000000071
472.487	211.735	6019.58	5	1000000076
336.826	32.5811	6020.64	5	1000000072
393.089	89.6002	6020.31	5	1000000068
374.447	106.087	6022.14	5	1000000080
287.42	116.724	6020.46	5	1000000064
386.721	152.937	6020.52	5	1000000235
420.005	242.272	6022.08	5	1000000077
399.326	17.8098	6023.23	5	1000000053
460.869	45.0945	6022.83	5	1000000054
330.726	61.4092	6022.89	5	1000000063
339.247	213.562	6024.18	5	1000000140
136.65	306.859	6004	5	1000000085
65.1498	350.209	6002.74	5	1000000084
163.25	265.604	6008.35	5	1000000098
154.66	325.792	6007.79	5	1000000086
144.473	438.069	6009.28	5	1000000091
170.962	440.008	6009.22	5	1000000087
123.688	293.561	6010.35	5	1000000089
131.047	391.033	6010.23	5	1000000088
206.454	293.743	6011.77	5	1000000099
203.919	372.646	6013.1	5	1000000092
109.869	442.076	6012.85	5	1000000102
143.155	461.614	6012.33	5	1000000096
130.077	494.735	6012.5	5	1000000103
226.432	404.899	6015.45	5	1000000090
227.728	304.473	6016.52	5	1000000100
215.902	411.213	6017.82	5	1000000093
139.342	480.99	6017.58	5	1000000097
190.772	253.592	6018.87	5	1000000120
235.679	434.855	6019.73	5	1000000095
215.08	320.134	6022.16	5	1000000101
219.141	490.94	6021.89	5	1000000107
149.169	322.512	6022.82	5	1000000104
185.491	393.359	6023.15	5	1000000164
186.077	417.912	6023.23	5	1000000094
81.0245	461.958	6023.07	5	1000000105
482.458	323	6015.54	5	1000000108
506.94	354.447	6014.73	5	1000000228
501.155	431.452	6015.43	5	1000000229
477.934	284.833	6017.52	5	1000000109
414.893	253.919	6018.44	5	1000000065
493.458	339.229	6019.3	5	1000000110
256.816	341.058	6019.4	5	1000000112
338.197	390.444	6020.13	5	1000000111
291.059	264.753	6020.69	5	1000000182
425.997	268.155	6022.41	5	1000000114
418.845	422.027	6022.28	5	1000000116
492.687	424.408	6020.65	5	1000000113
403.381	438.314	6022.36	5	1000000242
451.052	452.449	6021.99	5	1000000236
398.459	461.719	6020.77	5	1000000117
310.802	313.879	6024.41	5	1000000171
469.102	365.262	6023.87	5	1000000115
381.887	380.308	6022.73	5	1000000176
299.695	381.878	6023.63	5	1000000185
390.388	443.966	6024.49	5	1000000193
238.791	130.408	6025.6	5	1000000023
129.26	225.29	6025.63	5	1000000025
205.105	171.235	6027.16	5	1000000122
34.8834	196.556	6029.36	5	1000000123
218.137	153.854	6032.37	5	1000000129
202.74	100.925	6034.36	5	1000000021
240.468	246.698	6035	5	1000000124
231.305	156.7	6036.86	5	1000000126
185.687	106.827	6039.12	5	1000000121
177.004	244.748	6042.07	5	1000000130
222.926	135.059	6043.89	5	1000000125
231.984	199.289	6044.01	5	1000000131
186.697	223.9	6042.38	5	1000000127
250.57	239.651	6043.32	5	1000000128
239.25	162.397	6047.17	5	1000000132
309.942	42.1327	6025.91	5	1000000073
319.809	219.685	6025.79	5	1000000083
306.543	95.6713	6028.01	5	1000000079
419.058	112.292	6027.11	5	1000000074
506.94	175.373	6028.45	5	1000000237
438.149	35.9533	6030.88	5	1000000146
436.34	88.7979	6030.6	5	1000000222
278.932	97.3201	6029.46	5	1000000134
314.605	241.017	6029.8	5	1000000143
267.157	249.408	6029.53	5	1000000137
410.736	79.8698	6031.9	5	1000000144
345.605	140.483	6033.28	5	1000000142
470.774	212.021	6033.26	5	1000000231
506.94	226.91	6031.34	5	1000000223
280.353	23.3552	6035.68	5	1000000141
316.562	24.4981	6035.48	5	1000000243
360.288	36.8411	6034.04	5	1000000133
331.88	71.6054	6033.91	5	1000000138
337.728	123.779	6037.65	5	1000000155
415.123	146.344	6036.39	5	1000000139
370.841	181.424	6035.83	5	1000000145
433.061	98.2162	6040.67	5	1000000147
262.249	116.116	6041.4	5	1000000149
278.504	128.603	6040.73	5	1000000152
304.714	201.971	6041.04	5	1000000153
324.809	231.095	6041.76	5	1000000154
262.905	97.9534	6043.64	5	1000000151
331.14	142.781	6043.02	5	1000000156
416.763	44.4978	6047.83	5	1000000148
315.833	114.937	6047.15	5	1000000150
382.778	124.811	6049.72	5	1000000157
341.938	211.761	6052.02	5	1000000244
213.302	289.53	6025.51	5	1000000159
180.063	306.601	6025.94	5	1000000106
119.403	315.963	6025.01	5	1000000221
144.036	284.876	6030.31	5	1000000163
232.926	308.482	6028.76	5	1000000160
194.385	318.415	6027.01	5	1000000161
141.342	463.621	6028.25	5	1000000168
219.301	491.014	6027.37	5	1000000245
116.656	330.271	6029.83	5	1000000165
173.115	441.542	6037.23	5	1000000167
74.5499	272.78	6040.99	5	1000000162
104.421	349.762	6040.98	5	1000000166
246.32	352.717	6042.71	5	1000000203
198.632	431.548	6046.5	5	1000000238
150.643	355.378	6047.68	5	1000000169
197.437	443.876	6047.94	5	1000000170
432.255	333.377	6026.83	5	1000000172
456.808	341.147	6026.26	5	1000000174
452.067	358.145	6026.45	5	1000000184
277.909	424.732	6025.22	5	1000000189
372.851	469.065	6026.21	5	1000000119
295.36	267.088	6028.6	5	1000000224
368.453	290.263	6028.61	5	1000000183
290.67	365.957	6027.72	5	1000000175
280.43	378.949	6027.86	5	1000000177
418.658	339.354	6030.72	5	1000000173
433.325	378.132	6029.26	5	1000000118
428.97	401.731	6031.27	5	1000000178
379.488	416.691	6029.57	5	1000000179
448.667	459.261	6030.61	5	1000000180
346.129	277.219	6031.39	5	1000000196
394.166	288.019	6031.81	5	1000000198
314.056	335.933	6032.79	5	1000000190
428.663	366.535	6031.93	5	1000000191
327.262	370.14	6033.34	5	1000000192
506.94	379.322	6033.4	5	1000000201
357.209	444.561	6032.96	5	1000000186
448.615	444.921	6032.12	5	1000000206
342.302	471.525	6031.97	5	1000000194
483.295	486.415	6031.96	5	1000000181
462.318	293.683	6034.91	5	1000000197
322.691	310.622	6035.41	5	1000000207
305.727	313.92	6034.47	5	1000000187
453.233	322.232	6033.65	5	1000000202
500.236	419.286	6033.79	5	1000000239
304.78	485.557	6034.62	5	1000000200
296.041	412.895	6036.45	5	1000000188
290.135	430.622	6036.84	5	1000000199
265.23	270.353	6039.11	5	1000000195
475.116	406.778	6041.36	5	1000000204
310.949	476.621	6041.86	5	1000000211
385.164	331.794	6043.13	5	1000000214
502.513	354.403	6044.17	5	1000000210
302.533	317.468	6045.42	5	1000000212
426.681	337.533	6044.71	5	1000000205
359.697	413.493	6045.18	5	1000000216
376.141	367.6	6048.72	5	1000000213
331.982	411.571	6047.76	5	1000000232
409.979	467.112	6046.85	5	1000000225
401.096	501.873	6047.7	5	1000000240
375.338	323.081	6050.52	5	1000000208
436.362	256.548	6053	5	1000000158
405.238	351.389	6052.16	5	1000000209
286.752	366.622	6052.34	5	1000000218
264.823	372.466	6052.79	5	1000000215
373.855	266.154	6056.8	5	1000000217
60.8134	61.0509	5990.6	6	1000000001
186.397	10.3659	5995.84	6	1000000000
131.229	13.3673	6000.44	6	1000000002
199.599	27.0576	5999.53	6	1000000003
247.423	28.3921	6000.25	6	1000000027
59.6637	96.6135	6002.35	6	1000000018
110.712	132.168	6001.43	6	1000000010
178.75	161.866	6001.16	6	1000000005
71.3781	170.181	6001.53	6	1000000006
73.9163	37.4706	6004.3	6	1000000007
182.754	147.327	6003.59	6	1000000009
160.395	-5.96046e-08	6006.25	6	1000000246
102.872	67.7414	6008.01	6	1000000004
203.148	144.262	6008.14	6	1000000011
198.216	195.763	6010.06	6	1000000015
151.594	219.427	6010.5	6	1000000014
244.281	81.7487	6012.29	6	1000000057
107.409	139.155	6012.27	6	1000000219
171.101	217.855	6011.76	6	1000000013
193.726	134.518	6014.97	6	1000000022
230.643	161.401	6015.27	6	1000000017
90.2094	56.8334	6016.78	6	1000000226
194.96	97.7586	6016.17	6	1000000008
94.8456	161.64	6016.79	6	1000000019
146.243	124.716	6018.77	6	1000000016
151.647	153.118	6018.13	6	1000000012
108.7	161.93	6019.08	6	1000000230
242.098	218.795	6020.28	6	1000000020
241.696	176.702	6021.01	6	1000000024
250.419	106.31	6024.28	6	1000000081
192.251	157.486	6023.55	6	1000000227
274.893	-5.96046e-08	6002.58	6	1000000026
397.076	-5.96046e-08	6002.5	6	1000000241
373.477	36.7486	6001.76	6	1000000028
369.524	105.748	6002.54	6	1000000029
374.131	3.06927	6004.27	6	1000000030
369.555	70.2188	6003.54	6	1000000031
282.561	139.978	6004.37	6	1000000042
364.456	10.9951	6005.97	6	1000000220
366.793	81.6616	6007.01	6	1000000040
471.452	104.479	6006.64	6	1000000032
372.678	119.395	6005.09	6	1000000036
422.917	78.1461	6008.32	6	1000000034
307.105	130.969	6009.12	6	1000000051
282.591	11.511	6011.38	6	1000000033
486.467	37.2993	6010.13	6	1000000037
445.828	42.0424	6011.41	6	1000000038
269.52	68.4141	6009.59	6	1000000233
387.994	109.849	6010.78	6	1000000070
420.581	111.125	6009.41	6	1000000035
296.374	112.576	6009.81	6	1000000050
468.122	119.649	6011.32	6	1000000059
374.401	23.9016	6012.55	6	1000000043
320.433	57.2899	6012.23	6	1000000047
506.94	80.2817	6011.56	6	1000000234
486.799	81.233	6013.17	6	1000000039
384.36	199.218	6013.08	6	1000000045
414.896	8.04069	6015.89	6	1000000046
399.988	58.7358	6014.43	6	1000000066
329.958	83.4519	6013.81	6	1000000058
372.356	90.0341	6014.05	6	1000000044
402.402	91.3864	6013.87	6	1000000049
432.676	112.674	6014.49	6	1000000041
460.492	205.502	6015.36	6	1000000136
296.983	20.8068	6017.99	6	1000000078
262.774	59.009	6017.55	6	1000000067
345.645	65.437	6016.11	6	1000000048
457.979	69.7045	6016.97	6	1000000056
406.433	139.306	6016.59	6	1000000060
337.828	149.045	6016.76	6	1000000061
483.81	181.591	6017.15	6	1000000075
486.164	226.281	6016.88	6	1000000082
299.709	62.7846	6019	6	1000000055
417.577	88.9052	6018.44	6	1000000069
286.156	117.014	6020.29	6	1000000064
269.402	125.956	6019.5	6	1000000135
471.659	141.737	6019.62	6	1000000052
387.036	155.686	6018.74	6	1000000235
378.848	169.286	6018.79	6	1000000062
373.398	204.901	6018.56	6	1000000071
472.563	212.308	6018.43	6	1000000076
335.631	33.7714	6020.72	6	1000000072
372.748	106.451	6021.66	6	1000000080
397.854	18.1656	6023.52	6	1000000053
330.931	61.0652	6023.78	6	1000000063
391.621	91.7459	6023.83	6	1000000068
338.964	212.089	6023.46	6	1000000140
417.963	244.048	6024.39	6	1000000077
65.3326	348.03	6002.97	6	1000000084
132.327	307.655	6005.46	6	1000000085
160.813	266.381	6008.95	6	1000000098
152.916	327.777	6007.75	6	1000000086
122.981	291.238	6010.49	6	1000000089
128.997	391.094	6010.54	6	1000000088
143.249	438.353	6009.9	6	1000000091
171.854	441.963	6010.73	6	1000000087
130.136	492.543	6011.36	6	1000000103
203.028	296.604	6011.9	6	1000000099
106.681	440.58	6013.18	6	1000000102
140.856	462.44	6012.03	6	1000000096
202.939	373.739	6013.95	6	1000000092
224.209	308.062	6016.8	6	1000000100
227.205	405.836	6016.81	6	1000000090
192.6	258.047	6019.8	6	1000000120
213.895	411.44	6019.12	6	1000000093
137.177	480.56	6018.55	6	1000000097
210.618	290.163	6021.95	6	1000000159
182.462	393.903	6020.83	6	1000000164
238.399	435.095	6022.28	6	1000000095
82.2032	463.366	6021.45	6	1000000105
216.544	493.365	6020.87	6	1000000107
115.433	312.805	6023.95	6	1000000221
149.499	319.718	6022.93	6	1000000104
212.614	319.861	6023.57	6	1000000101
505.463	356.094	6015.81	6	1000000228
499.239	432.606	6014.12	6	1000000229
477.135	291.433	6017.55	6	1000000109
414.647	257.684	6019.5	6	1000000065
476.484	320.381	6019.68	6	1000000108
289.025	262.234	6021.75	6	1000000182
425.327	268.566	6022.48	6	1000000114
255.517	340.69	6020.4	6	1000000112
490.284	340.564	6021.9	6	1000000110
418.61	424.208	6022.25	6	1000000116
447.43	456.034	6020.79	6	1000000236
397.917	464.784	6021.2	6	1000000117
310.397	313.903	6024.09	6	1000000171
465.038	365.713	6024.46	6	1000000115
298.131	380.649	6024	6	1000000185
335.92	391.693	6022.91	6	1000000111
405.076	443.972	6022.72	6	1000000242
236.903	128.274	6026.59	6	1000000023
131.962	225.258	6025.56	6	1000000025
217.105	155.196	6028.93	6	1000000129
202.14	171.167	6027.9	6	1000000122
36.1477	195.682	6027.12	6	1000000123
106.11	147.805	6029.23	6	1000000247
231.609	155.806	6032.81	6	1000000126
240.338	245.142	6033.13	6	1000000124
199.39	104.261	6034.9	6	1000000021
234.714	115.447	6039.38	6	1000000248
182.883	112.333	6042.75	6	1000000121
232.567	202.344	6042.38	6	1000000131
179.767	224.78	6042.69	6	1000000127
175.463	245.111	6043.44	6	1000000130
214.69	141.076	6045.74	6	1000000125
237.566	161.533	6047.16	6	1000000132
458.995	45.9986	6024.85	6	1000000054
318.089	219.465	6025.25	6	1000000083
310.807	43.6194	6028.42	6	1000000073
306.905	95.5584	6027.39	6	1000000079
470.513	212.668	6028.01	6	1000000231
435.255	38.0858	6030.47	6	1000000146
368.243	69.8823	6029.81	6	1000000249
415.413	110.164	6029.1	6	1000000074
345.032	138.805	6031.03	6	1000000142
502.849	178.611	6030.23	6	1000000237
506.94	227.922	6030.06	6	1000000223
313.474	243.492	6029.97	6	1000000143
268.014	250.552	6030.68	6	1000000137
412.146	80.5575	6033.35	6	1000000144
432.509	88.8578	6032.39	6	1000000222
275.524	97.4244	6031.36	6	1000000134
333.876	122.564	6032.29	6	1000000155
279.812	23.0983	6033.58	6	1000000141
358.723	38.1529	6035.11	6	1000000133
327.933	68.2275	6034.74	6	1000000138
411.769	148.148	6034.84	6	1000000139
370.577	180.737	6035.56	6	1000000145
303.904	199.385	6035.54	6	1000000153
315.325	25.5449	6036.62	6	1000000243
263.221	113.177	6037.54	6	1000000149
322.473	232.238	6040.66	6	1000000154
429.21	99.3548	6042.45	6	1000000147
278.816	122.781	6043.25	6	1000000152
253.846	241.071	6043.27	6	1000000128
256.19	95.9593	6044.74	6	1000000151
328.196	140.753	6044.7	6	1000000156
316.929	113.962	6048.42	6	1000000150
413.524	43.4034	6050.02	6	1000000148
387.235	127.153	6052.51	6	1000000157
178.762	303.578	6025.68	6	1000000106
193.45	320.156	6025.26	6	1000000161
186.094	416.906	6026.13	6	1000000094
140.733	462.842	6026.69	6	1000000168
113.359	330.343	6029.93	6	1000000165
230.04	308.146	6032.44	6	1000000160
217.152	495.772	6031.53	6	1000000245
140.397	281.923	6033.63	6	1000000163
71.8147	267.94	6039.53	6	1000000162
172.901	443.502	6039.07	6	1000000167
104.629	349.606	6041.93	6	1000000166
247.511	350.484	6040.72	6	1000000203
200.268	446.775	6045.15	6	1000000170
150.889	355.329	6047.15	6	1000000169
196.89	434.001	6050.52	6	1000000238
457.644	340.411	6026.54	6	1000000174
378.783	383.922	6025.33	6	1000000176
273.969	424.901	6025.09	6	1000000189
382.646	448.55	6026.75	6	1000000193
289.632	263.044	6027.49	6	1000000224
365.467	289.976	6029.05	6	1000000183
430.704	333.06	6027.53	6	1000000172
290.482	368.181	6028.7	6	1000000175
278.971	380.949	6027.77	6	1000000177
370.646	470.738	6028.37	6	1000000119
343.98	279.413	6030.4	6	1000000196
313.723	336.915	6031.11	6	1000000190
450.744	360.115	6030.1	6	1000000184
429.228	379.477	6029.46	6	1000000118
377.881	417.825	6030.5	6	1000000179
439.19	449.084	6030.81	6	1000000206
338.335	473.206	6029.57	6	1000000194
390.772	289.563	6031.88	6	1000000198
417.87	342.975	6032.93	6	1000000173
423.949	366.55	6032.04	6	1000000191
425.599	405.978	6032.08	6	1000000178
496.374	421.629	6032.1	6	1000000239
444.773	463.003	6031.67	6	1000000180
480.4	489.094	6031.61	6	1000000181
459.385	294.936	6035.43	6	1000000197
326.341	311.343	6035.39	6	1000000207
325.558	370.106	6033.58	6	1000000192
506.94	380.252	6034.76	6	1000000201
356.02	446.557	6034.65	6	1000000186
302.282	487.192	6034.56	6	1000000200
452.203	322.567	6037.07	6	1000000202
295.075	413.037	6035.95	6	1000000188
291.865	432.201	6036.55	6	1000000199
473.016	408.052	6039.86	6	1000000204
424.354	337.816	6041.61	6	1000000205
309.972	477.405	6040.22	6	1000000211
266.504	268.353	6044.26	6	1000000195
303.77	315.797	6043.23	6	1000000212
385.049	332.114	6043.26	6	1000000214
502.745	355.909	6043.25	6	1000000210
358.286	415.069	6045.99	6	1000000216
411.16	468.721	6047.75	6	1000000225
373.921	321.837	6050.25	6	1000000208
371.56	368.039	6050.6	6	1000000213
283.641	368.042	6051.76	6	1000000218
261.837	376.227	6051.73	6	1000000215
327.205	409.541	6053.29	6	1000000232
450.246	455.088	6053	6	1000000250
433.129	260.124	6054.9	6	1000000158
401.651	355.112	6053.62	6	1000000209
369.69	265.932	6055.69	6	1000000217
60.2208	60.953	5990.6	7	1000000001
185.299	10.5953	5996.24	7	1000000000
131.561	11.8218	5999.31	7	1000000002
198.513	27.4975	5999.55	7	1000000003
247.691	32.0633	5999.82	7	1000000027
108.366	133.964	5999.14	7	1000000010
75.4138	35.7853	6001.61	7	1000000007
57.8297	93.845	6002.05	7	1000000018
178.971	162.977	6001.83	7	1000000005
67.8342	169.841	6000.84	7	1000000006
159.522	-5.96046e-08	6003.56	7	1000000246
179.125	146.942	6003.11	7	1000000009
105.451	63.1662	6007.22	7	1000000004
201.561	144.191	6008.24	7	1000000011
107.48	169.559	6008.28	7	1000000251
172.36	217.494	6010.86	7	1000000013
241.964	80.1858	6012.44	7	1000000057
104.837	136.797	6011.67	7	1000000219
197.957	193.63	6011.68	7	1000000015
88.6564	55.4955	6014.87	7	1000000226
194.681	97.4869	6014.49	7	1000000008
193.942	133.654	6015.12	7	1000000022
109.481	156.281	6015.55	7	1000000230
152.213	220.644	6014.23	7	1000000014
144.996	124.431	6017.98	7	1000000016
95.7139	159.268	6017.01	7	1000000019
226.607	164.463	6016.06	7	1000000017
147.934	150.005	6018.39	7	1000000012
198.199	177.323	6019.57	7	1000000252
240.961	175.393	6022.1	7	1000000024
239.479	216.21	6021.05	7	1000000020
249.475	104.522	6024.27	7	1000000081
106.977	147.025	6022.63	7	1000000247
273.542	1.12348	6002.16	7	1000000026
372.748	37.0514	6002.36	7	1000000028
397.654	1.07541	6003.3	7	1000000241
369.269	70.4057	6003.16	7	1000000031
371.058	108.161	6002.8	7	1000000029
283.451	141.841	6004.01	7	1000000042
373.558	3.80334	6005.12	7	1000000030
365.01	13.7494	6006.29	7	1000000220
366.106	82.3482	6005.94	7	1000000040
470.634	104.17	6006.52	7	1000000032
369.404	122.21	6005.26	7	1000000036
268.764	67.4483	6009.22	7	1000000233
423.452	78.663	6009.07	7	1000000034
298.027	114.238	6007.36	7	1000000050
306.424	132.174	6008.37	7	1000000051
420.141	108.825	6009.86	7	1000000035
468.811	121.441	6009.52	7	1000000059
506.94	202.068	6011.17	7	1000000253
280.59	11.75	6012.06	7	1000000033
372.611	24.3254	6012.43	7	1000000043
485.976	40.1594	6013.12	7	1000000037
443.872	41.4425	6011.75	7	1000000038
319.229	56.113	6012.83	7	1000000047
506.94	79.7701	6011.98	7	1000000234
489.019	81.1695	6013.05	7	1000000039
330.793	82.9743	6013.56	7	1000000058
371.82	88.3587	6012.71	7	1000000044
386.596	110.146	6012.06	7	1000000070
385.243	200.487	6013.31	7	1000000045
416.386	9.80179	6015.24	7	1000000046
398.565	59.7909	6014.95	7	1000000066
344.453	64.1784	6015.65	7	1000000048
400.338	90.3323	6014.29	7	1000000049
406.872	138.463	6015.74	7	1000000060
467.185	145.446	6015.7	7	1000000052
481.172	183.02	6014.76	7	1000000075
460.418	205.548	6015.31	7	1000000136
263.174	57.7449	6017.1	7	1000000067
298.906	62.0621	6017.92	7	1000000055
458.981	67.325	6018	7	1000000056
415.529	89.2103	6016.88	7	1000000069
432.181	112.32	6016.14	7	1000000041
266.459	125.618	6017.48	7	1000000135
334.448	149.431	6016.13	7	1000000061
386.679	157.099	6017.65	7	1000000235
471.333	212.524	6016.32	7	1000000076
484.266	225.47	6017.04	7	1000000082
294.773	19.5683	6018.92	7	1000000078
285.754	116.803	6019.41	7	1000000064
378.363	170.883	6018.86	7	1000000062
373.768	205.437	6018.41	7	1000000071
334.548	33.8894	6021.2	7	1000000072
370.428	105.516	6021.41	7	1000000080
395.836	18.7628	6022.76	7	1000000053
459.315	44.5632	6023.48	7	1000000054
329.52	59.7884	6022.94	7	1000000063
458.853	173.741	6023.2	7	1000000254
338.695	210.667	6024.64	7	1000000140
65.6273	345.619	6002.31	7	1000000084
130.648	307.024	6004.98	7	1000000085
160.124	264.428	6008.77	7	1000000098
123.664	287.29	6008.39	7	1000000089
148.704	327.939	6007.36	7	1000000086
200.646	298.734	6011.16	7	1000000099
128.359	387.078	6010.47	7	1000000088
142.694	438.312	6009.65	7	1000000091
172.614	443.629	6009.86	7	1000000087
129.449	491.049	6010.8	7	1000000103
202.457	375.268	6012.83	7	1000000092
106.008	440.677	6013.11	7	1000000102
137.578	458.184	6012.38	7	1000000096
226.317	408.043	6014.8	7	1000000090
222.213	308.893	6016.25	7	1000000100
192.653	258.147	6019.05	7	1000000120
208.706	288.793	6020.17	7	1000000159
179.963	394.885	6019.78	7	1000000164
210.524	413.724	6019.58	7	1000000093
136.767	479.208	6019.21	7	1000000097
114.584	311.669	6020.63	7	1000000221
149.199	317.21	6020.46	7	1000000104
80.6363	463.214	6021.52	7	1000000105
190.511	318.679	6023.67	7	1000000161
209.573	318.333	6023.03	7	1000000101
212.889	496.453	6023.22	7	1000000107
499.136	435.927	6014.62	7	1000000229
476.903	293.319	6016.43	7	1000000109
502.464	355.116	6016.66	7	1000000228
414.405	261.141	6019.82	7	1000000065
286.328	260.9	6021.02	7	1000000182
254.433	339.834	6021.46	7	1000000112
489.17	339.981	6020.73	7	1000000110
490.532	426.321	6021.84	7	1000000113
404.303	447.908	6021.79	7	1000000242
443.792	460.184	6021.94	7	1000000236
399.047	465.742	6021.61	7	1000000117
423.94	266.705	6024.32	7	1000000114
308.458	312.664	6023.67	7	1000000171
471.766	321.009	6023.52	7	1000000108
460.619	363.426	6024.28	7	1000000115
296.88	377.308	6022.98	7	1000000185
333.954	392.464	6023.06	7	1000000111
268.801	426.942	6024.4	7	1000000189
415.202	426.75	6022.7	7	1000000116
191.349	156.687	6026.02	7	1000000227
36.8487	195.953	6025.49	7	1000000123
129.953	224.177	6025.22	7	1000000025
235.566	125.193	6028.9	7	1000000023
229.38	151.316	6028.46	7	1000000126
216.032	157.891	6029.26	7	1000000129
202.508	168.35	6029.15	7	1000000122
197.746	106.977	6034.97	7	1000000021
235.822	243.302	6034.62	7	1000000124
231.753	110.106	6038.73	7	1000000248
253.114	82.0997	6042.22	7	1000000255
249.543	96.7776	6040.49	7	1000000151
185.268	115.55	6042.05	7	1000000121
231.159	200.031	6041.1	7	1000000131
173.416	244.274	6041.28	7	1000000130
177.298	224.604	6044.34	7	1000000127
211.754	143.475	6044.9	7	1000000125
236.009	159.709	6045.9	7	1000000132
471.568	87.5719	6026.1	7	1000000256
388.601	91.4539	6025.71	7	1000000068
315.798	217.363	6025.49	7	1000000083
434.149	37.7869	6027.73	7	1000000146
311.395	42.7315	6028.11	7	1000000073
366.549	66.848	6028.47	7	1000000249
306.79	95.8219	6027.36	7	1000000079
470.687	214.612	6027.06	7	1000000231
506.94	229.562	6027.32	7	1000000223
429.483	85.7336	6030.4	7	1000000222
414.711	109.388	6029.39	7	1000000074
332.019	122.93	6030.36	7	1000000155
499.99	178.127	6030.25	7	1000000237
280.174	19.9794	6033.26	7	1000000141
411.413	81.4693	6031.8	7	1000000144
273.879	98.0081	6031.89	7	1000000134
342.389	137.211	6032.74	7	1000000142
310.921	243.43	6031.59	7	1000000143
268.452	249.547	6031.71	7	1000000137
314.186	25.582	6034.5	7	1000000243
357.578	40.6199	6034.89	7	1000000133
261.064	112.017	6035.42	7	1000000149
409.667	149.058	6034.58	7	1000000139
302.366	200.053	6034.64	7	1000000153
320.152	65.0042	6036.52	7	1000000138
369.939	178.593	6036.64	7	1000000145
319.962	230.893	6038.98	7	1000000154
430.385	100.74	6043.83	7	1000000147
278.518	125.029	6045.55	7	1000000152
326.154	136.814	6045.82	7	1000000156
254.731	239.784	6044.87	7	1000000128
317.225	113.142	6047.92	7	1000000150
339.916	205.727	6049.12	7	1000000244
411.911	43.7665	6051.24	7	1000000148
389.1	126.6	6054.71	7	1000000157
178.43	301.018	6025.6	7	1000000106
242.252	435.676	6025.96	7	1000000095
188.158	415.71	6028.05	7	1000000094
142.98	459.747	6027.71	7	1000000168
116.247	329.98	6031.34	7	1000000165
217.407	496.68	6033.08	7	1000000245
140.454	278.656	6035.07	7	1000000163
228.379	311.615	6035.77	7	1000000160
249.144	349.104	6039.65	7	1000000203
171.652	439.864	6039.72	7	1000000167
69.5441	267.603	6042.14	7	1000000162
104.268	349.437	6043.66	7	1000000166
201.811	447.718	6043.44	7	1000000170
150.199	356.252	6046.7	7	1000000169
195.104	435.119	6050.36	7	1000000238
455.317	341.717	6026.59	7	1000000174
377.133	380.475	6026.29	7	1000000176
286.655	260.257	6027.31	7	1000000224
362.314	290.876	6028.62	7	1000000183
430.553	332.261	6028.45	7	1000000172
291.234	368.111	6027.43	7	1000000175
377.821	452.127	6028.32	7	1000000193
432.042	451.751	6027.85	7	1000000206
335.435	472.021	6028.17	7	1000000194
342.091	276.48	6029.71	7	1000000196
388.122	290.955	6030.79	7	1000000198
312.724	336.461	6030.85	7	1000000190
448.751	360.396	6030.95	7	1000000184
421.286	367.503	6029.63	7	1000000191
425.116	380.344	6030.18	7	1000000118
278.415	381.112	6030.25	7	1000000177
421.324	407.074	6030.13	7	1000000178
366.487	472.716	6029.17	7	1000000119
325.51	309.879	6032.41	7	1000000207
324.473	375.276	6033.35	7	1000000192
502.701	383.09	6032.33	7	1000000201
375.695	418.572	6032.4	7	1000000179
494.148	423.436	6033.45	7	1000000239
441.697	465.697	6032.99	7	1000000180
475.124	490.124	6032.92	7	1000000181
457.307	295.488	6034.97	7	1000000197
418.669	346.138	6034.67	7	1000000173
297.938	490.581	6034.96	7	1000000200
307.85	316.094	6035.96	7	1000000187
451.26	322.121	6037.34	7	1000000202
294.523	412.476	6038.17	7	1000000188
290.662	431.624	6037.91	7	1000000199
356.058	447.986	6038.2	7	1000000186
307.215	477.338	6039.79	7	1000000211
301.666	316.691	6041.95	7	1000000212
423.812	339.235	6042.07	7	1000000205
502.21	356.429	6041.1	7	1000000210
469.259	409.331	6040.31	7	1000000204
381.017	330.542	6042.43	7	1000000214
407.861	469.552	6044.52	7	1000000225
267.874	265.891	6048.37	7	1000000195
355.838	415.061	6047.62	7	1000000216
402.505	506.94	6047.4	7	1000000240
398.928	352.358	6050.79	7	1000000209
367.946	265.078	6052.83	7	1000000217
372.157	318.989	6053.27	7	1000000208
367.824	365.574	6052.17	7	1000000213
274.282	368.008	6053.78	7	1000000218
257.923	378.405	6053.63	7	1000000215
322.088	407.469	6053.6	7	1000000232
446.184	456.819	6054.14	7	1000000250
428.1	260.693	6057.08	7	1000000158
58.4917	60.8591	5990.6	8	1000000001
186.393	10.9897	5994.4	8	1000000000
131.695	12.1343	5998.02	8	1000000002
105.112	137.634	5997.18	8	1000000010
161.379	5.29065	5999.77	8	1000000246
199.138	30.6745	5998.87	8	1000000003
248.572	32.5911	6000.01	8	1000000027
76.7716	35.1664	6000.22	8	1000000007
66.0149	167.424	5998.84	8	1000000006
55.3515	92.3455	6001.02	8	1000000018
176.792	146.076	6001.03	8	1000000009
180.271	165.118	6001.45	8	1000000005
104.596	60.2704	6004.19	8	1000000004
200.214	141.925	6006.2	8	1000000011
106.582	165.737	6006.47	8	1000000251
194.822	193.771	6008.45	8	1000000015
92.2901	53.8553	6010.74	8	1000000226
241.915	79.7522	6010.83	8	1000000057
103.054	135.739	6009.77	8	1000000219
173.92	215.529	6011.12	8	1000000013
192.825	99.6307	6012.78	8	1000000008
110.197	153.537	6012.33	8	1000000230
155.441	220.715	6013.14	8	1000000014
195.489	134.322	6015.29	8	1000000022
226.724	163.33	6015.48	8	1000000017
147.069	127.24	6018	8	1000000016
145.941	153.72	6016.54	8	1000000012
93.6375	158.402	6016.78	8	1000000019
197.604	177.384	6017.29	8	1000000252
240.565	173.556	6021.13	8	1000000024
236.883	215.34	6020.99	8	1000000020
248.657	103.438	6023.85	8	1000000081
36.6646	195.872	6024.03	8	1000000123
273.539	1.143	6002.11	8	1000000026
398.622	3.24629	6003.26	8	1000000241
372.796	39.8021	6003.43	8	1000000028
369.614	72.2548	6004.41	8	1000000031
369.392	109.033	6002.77	8	1000000029
368.928	123.614	6004.75	8	1000000036
283.301	145.273	6004.29	8	1000000042
374.574	5.49769	6006.07	8	1000000030
365.233	14.6166	6007.03	8	1000000220
365.409	81.7663	6006.68	8	1000000040
268.876	68.6707	6008.06	8	1000000233
423.638	79.3169	6008.84	8	1000000034
469.325	104.649	6007.8	8	1000000032
418.236	107.445	6007.12	8	1000000035
300.26	116.977	6007.53	8	1000000050
306.395	135.111	6008.64	8	1000000051
442.529	41.5089	6010.42	8	1000000038
468.57	121.302	6010.19	8	1000000059
506.94	202.773	6010.34	8	1000000253
280.925	12.161	6011.72	8	1000000033
414.4	12.2411	6012.91	8	1000000046
372.382	27.5876	6013.09	8	1000000043
317.266	54.2739	6013.24	8	1000000047
506.94	78.9782	6012.37	8	1000000234
490.699	81.0677	6013.67	8	1000000039
465.006	147.055	6013.62	8	1000000052
384.236	202.495	6012.53	8	1000000045
482.541	44.7016	6014.45	8	1000000037
264.172	54.6424	6014.4	8	1000000067
398.152	63.3598	6014.3	8	1000000066
329.025	81.7828	6014.2	8	1000000058
373.025	89.2372	6013.75	8	1000000044
398.837	91.3753	6014.41	8	1000000049
384.202	110.633	6015.46	8	1000000070
431.543	117.026	6013.91	8	1000000041
333.719	151.694	6014.71	8	1000000061
476.63	182.489	6013.86	8	1000000075
354.561	210.563	6015.02	8	1000000257
296.249	62.2128	6017.69	8	1000000055
342.992	61.2431	6015.95	8	1000000048
458.374	66.7863	6017.88	8	1000000056
413.851	92.0349	6016.77	8	1000000069
284.584	117.529	6018.01	8	1000000064
265.871	126.484	6016.97	8	1000000135
406.002	140.123	6016.48	8	1000000060
386.798	158.044	6016.19	8	1000000235
458.134	205.612	6017.8	8	1000000136
372.554	207.53	6017.2	8	1000000071
469.441	213.698	6016.72	8	1000000076
481.251	227.352	6017.04	8	1000000082
295.852	18.4491	6018.83	8	1000000078
377.404	172.47	6018.63	8	1000000062
422.402	195.755	6021.18	8	1000000258
394.56	20.4817	6021.57	8	1000000053
336.426	33.1652	6021.38	8	1000000072
458.823	44.2983	6021.14	8	1000000054
308.013	95.2895	6023.54	8	1000000079
368.899	105.554	6020.88	8	1000000080
456.388	173.911	6021.64	8	1000000254
329.925	58.594	6022.7	8	1000000063
494.881	179.917	6023.68	8	1000000237
129.69	309.421	6004.82	8	1000000085
64.9158	344.251	6003.11	8	1000000084
121.118	285.881	6006.7	8	1000000089
146.188	331.404	6006.99	8	1000000086
157.025	264.669	6007.75	8	1000000098
126.716	490.201	6009.03	8	1000000103
197.291	301.802	6011.06	8	1000000099
126.664	385.082	6010.08	8	1000000088
141.713	441.81	6010.65	8	1000000091
172.187	444.429	6010.46	8	1000000087
135	455.352	6010.91	8	1000000096
201.841	379.698	6012.92	8	1000000092
106.21	440.475	6012.56	8	1000000102
220.494	309.804	6015.87	8	1000000100
225.321	414.232	6014.74	8	1000000090
194.363	255.968	6018.85	8	1000000120
206.721	287.596	6019.16	8	1000000159
111.875	308.871	6019.6	8	1000000221
147.683	317.2	6019.22	8	1000000104
177.153	396.651	6019.73	8	1000000164
208.711	415.496	6019.48	8	1000000093
134.838	479.429	6019	8	1000000097
76.8467	460.323	6020.88	8	1000000105
213.181	499.493	6021.87	8	1000000107
206.974	318.172	6023.36	8	1000000101
186.925	320.634	6022.97	8	1000000161
499.539	439.027	6014.71	8	1000000229
475.688	296.3	6016.91	8	1000000109
496.617	355.912	6017.37	8	1000000228
281.301	256.971	6019.81	8	1000000182
413.511	264.123	6021.01	8	1000000065
304.745	313.543	6021.92	8	1000000171
491.415	428.087	6021.47	8	1000000113
415.242	429.449	6021.63	8	1000000116
402.553	451.72	6021.55	8	1000000242
398.507	467.522	6021.95	8	1000000117
469.245	321.25	6024.01	8	1000000108
254.102	339.528	6022.89	8	1000000112
485.512	343.54	6022.73	8	1000000110
297.353	374.567	6022.88	8	1000000185
335.209	393.978	6022.76	8	1000000111
265.34	426.043	6023.92	8	1000000189
442.651	461.98	6024.29	8	1000000236
217.326	158.316	6026.44	8	1000000129
203.893	167.473	6026.57	8	1000000122
129.162	222.924	6025.41	8	1000000025
235.181	125.907	6027.8	8	1000000023
228.735	148.515	6027.07	8	1000000126
192.321	153.805	6027.11	8	1000000227
238.012	243.756	6032.85	8	1000000124
195.596	108.631	6034.97	8	1000000021
171.04	243.943	6035.43	8	1000000130
231.698	198.033	6037.69	8	1000000131
230.614	108.097	6039.46	8	1000000248
250.911	78.5547	6041.58	8	1000000255
242.935	93.3078	6043.06	8	1000000151
186.021	119.804	6042.37	8	1000000121
208.469	142.645	6042.78	8	1000000125
233.214	157.363	6045.49	8	1000000132
173.658	225.95	6045.84	8	1000000127
431.105	38.1754	6025.09	8	1000000146
385.027	89.2997	6025.54	8	1000000068
467.31	215.128	6025.98	8	1000000231
315.612	216.513	6026.09	8	1000000083
501.431	230.129	6026.31	8	1000000223
506.94	239.615	6025.93	8	1000000259
416.781	245.602	6026.4	8	1000000077
311.982	46.4181	6027.72	8	1000000073
366.042	62.1932	6028.8	8	1000000249
412.095	110.765	6027.96	8	1000000074
330.075	123.287	6027.28	8	1000000155
337.819	210.405	6027.61	8	1000000140
279.973	19.9722	6030.68	8	1000000141
311.838	25.4838	6030.54	8	1000000243
412.325	83.0731	6030.78	8	1000000144
428.377	83.5647	6030.98	8	1000000222
273.779	95.953	6030.56	8	1000000134
259.808	107.498	6031.33	8	1000000149
256.129	115.67	6032.19	8	1000000260
342.556	137.532	6032.29	8	1000000142
310.157	246.761	6032.91	8	1000000143
266.099	248.701	6031.91	8	1000000137
408.643	151.257	6033.91	8	1000000139
371.696	177.816	6034.48	8	1000000145
355.672	39.4882	6036.66	8	1000000133
317.439	63.6184	6037.23	8	1000000138
305.24	198.759	6036.63	8	1000000153
318.707	230.634	6040.3	8	1000000154
433.457	101.295	6043.51	8	1000000147
255.21	240.081	6043.46	8	1000000128
315.322	113.308	6046.27	8	1000000150
328.097	133.47	6045.82	8	1000000156
275.959	125.042	6046.78	8	1000000152
340.13	205.339	6049.38	8	1000000244
410.766	43.6187	6051.96	8	1000000148
393.747	124.834	6056.65	8	1000000157
175.275	294.591	6025.61	8	1000000106
144.856	459.805	6024.93	8	1000000168
187.785	413.204	6028.7	8	1000000094
245.125	435.708	6027.9	8	1000000095
141.169	279.902	6030.52	8	1000000163
186.154	326.921	6034.8	8	1000000261
115.808	327.834	6033.67	8	1000000165
248.655	345.77	6035.08	8	1000000203
217.335	496.546	6034.59	8	1000000245
227.701	313.762	6036.63	8	1000000160
69.3386	264.433	6038.17	8	1000000162
165.36	434.211	6041.75	8	1000000167
105.099	350.322	6043.46	8	1000000166
202.729	445.694	6045.66	8	1000000170
144.676	356.27	6046.97	8	1000000169
188.086	435.268	6051.9	8	1000000238
459.054	361.983	6024.71	8	1000000115
506.94	379.267	6026	8	1000000262
373.998	381.951	6025.87	8	1000000176
423.243	268.385	6027.77	8	1000000114
360.36	290.478	6028.62	8	1000000183
453.391	343.491	6027.53	8	1000000174
291.939	366.171	6028.76	8	1000000175
419.578	407.687	6028.26	8	1000000178
430.446	454.776	6026.91	8	1000000206
333.792	472.202	6028.72	8	1000000194
341.945	275.799	6031.07	8	1000000196
386.565	291.929	6029.52	8	1000000198
327.332	306.615	6029.82	8	1000000207
428.334	330.559	6029.74	8	1000000172
311.145	335.775	6030.26	8	1000000190
447.038	360.501	6030.76	8	1000000184
420.318	367.642	6031.07	8	1000000191
278.699	381.779	6029.97	8	1000000177
423.1	381.717	6030.24	8	1000000118
373.801	416.952	6030.5	8	1000000179
376.347	451.032	6029.49	8	1000000193
502.329	385.312	6032.4	8	1000000201
363.478	472.435	6031.74	8	1000000119
455.262	295.331	6034.62	8	1000000197
310.128	314.326	6034.06	8	1000000187
446.722	324.144	6035.66	8	1000000202
327.895	380.02	6033.69	8	1000000192
493.718	425.063	6033.58	8	1000000239
470.71	490.15	6034.66	8	1000000181
293.776	410.303	6036.28	8	1000000188
289.62	430.685	6036.74	8	1000000199
294.696	493.144	6036.41	8	1000000200
420.214	349.058	6038.78	8	1000000173
500.219	358.115	6039.34	8	1000000210
467.454	409.354	6039.34	8	1000000204
353.719	447.519	6039.15	8	1000000186
300.077	314.968	6040.14	8	1000000212
376.799	329.829	6041.77	8	1000000214
305.861	478.699	6040.96	8	1000000211
409.013	471.456	6043.89	8	1000000225
419.953	337.903	6045.24	8	1000000205
353.677	414.22	6045.5	8	1000000216
403.577	506.94	6046.12	8	1000000240
267.577	263.788	6048.54	8	1000000195
394.803	353.489	6048.92	8	1000000209
366.346	366.004	6050.54	8	1000000213
365.763	262.871	6051.42	8	1000000217
369.969	319.408	6052.71	8	1000000208
258.612	379.579	6052.57	8	1000000215
321.199	405.595	6052.77	8	1000000232
440.963	457.096	6052.07	8	1000000250
271.946	371.382	6054.59	8	1000000218
422.125	262.618	6058.8	8	1000000158
55.8061	62.5219	5990.6	9	1000000001
184.392	12.5798	5992.95	9	1000000000
105.4	137.068	5995.41	9	1000000010
130.987	12.6233	5997.43	9	1000000002
76.1573	33.0829	5996.61	9	1000000007
64.8438	165.304	5998.05	9	1000000006
196.986	34.0556	5999.21	9	1000000003
53.6556	91.3905	5998.78	9	1000000018
176.232	146.427	6000.45	9	1000000009
159.634	4.35377	6000.54	9	1000000246
248.65	35.5989	6000.63	9	1000000027
180.435	166.596	6001.61	9	1000000005
105.478	57.4108	6003.81	9	1000000004
92.1748	53.453	6006.72	9	1000000226
197.467	140.141	6006.09	9	1000000011
104.223	166.281	6005.85	9	1000000251
101.412	134.052	6008.23	9	1000000219
191.647	195.602	6008.41	9	1000000015
109.006	152.257	6011.03	9	1000000230
173.151	213.468	6009.32	9	1000000013
242.193	82.3128	6011.87	9	1000000057
192.419	99.7453	6012.48	9	1000000008
223.217	166.915	6013.57	9	1000000017
91.2258	161.444	6014.05	9	1000000019
147.086	128.076	6017.2	9	1000000016
193.134	138.658	6017.93	9	1000000022
146.219	156.585	6017.54	9	1000000012
234.582	168.618	6018.23	9	1000000024
193.625	178.942	6018.8	9	1000000252
235.541	215.426	6018.23	9	1000000020
35.4726	194.803	6021.63	9	1000000123
247.381	100.566	6024.52	9	1000000081
226.116	148.478	6024.02	9	1000000126
215.789	159.822	6023.99	9	1000000129
129.323	223.196	6023.04	9	1000000025
270.648	3.96109	6002.83	9	1000000026
396.692	4.47438	6003.32	9	1000000241
370.651	38.9037	6003.28	9	1000000028
369.17	73.6756	6003.92	9	1000000031
367.634	110.865	6003.16	9	1000000029
373.851	4.26148	6005.72	9	1000000030
365.652	14.6703	6006.48	9	1000000220
365.016	81.2374	6006.64	9	1000000040
365.793	126.027	6005.12	9	1000000036
278.873	149.603	6005.62	9	1000000042
268.696	68.9633	6007.55	9	1000000233
416.84	106.083	6007.74	9	1000000035
468.075	104.626	6007.84	9	1000000032
299.553	119.879	6007.56	9	1000000050
465.598	120.864	6009.12	9	1000000059
302.807	137.312	6007.98	9	1000000051
502.43	76.4894	6009.35	9	1000000234
424.119	80.7537	6010.13	9	1000000034
505.759	204.964	6010.27	9	1000000253
414.355	12.5088	6012.38	9	1000000046
278.514	14.4241	6012.44	9	1000000033
440.51	38.4812	6011.53	9	1000000038
263.778	50.1795	6013.48	9	1000000067
488.353	80.3464	6013.03	9	1000000039
328.164	81.2714	6013.49	9	1000000058
396.698	93.6069	6012.71	9	1000000049
386.473	156.733	6013.48	9	1000000235
384.412	204.979	6012.23	9	1000000045
354.539	213.548	6013.21	9	1000000257
372.474	30.9283	6014.43	9	1000000043
312.231	52.8267	6014.39	9	1000000047
372.499	89.6108	6014.45	9	1000000044
381.232	110.807	6014.66	9	1000000070
429.529	116.811	6014.32	9	1000000041
405.991	141.101	6015.49	9	1000000060
330.577	150.259	6014.22	9	1000000061
464.927	151.513	6014.15	9	1000000052
467.733	214.694	6015.82	9	1000000076
294.074	60.4737	6017.37	9	1000000055
342.696	59.5463	6017.77	9	1000000048
457.842	65.939	6017.7	9	1000000056
396.437	67.4575	6016.84	9	1000000066
411.497	93.0523	6016.41	9	1000000069
364.599	105.628	6017.9	9	1000000080
[truncated: 45,216 more rows]

## Sheet: embryo-2-Anterior
Position
Position X	Position Y	Position Z	Time	TrackID
135.087	56.4444	5972.7	1	1000000000
86.5618	134.355	5977.46	1	1000000001
187.445	230.69	5978.22	1	1000000002
242.598	217.266	5994.36	1	1000000003
327.377	159.47	5966	1	1000000004
337.043	196.934	5969.87	1	1000000005
376.913	244.496	5971.83	1	1000000006
306.742	203.998	5974.35	1	1000000007
279.34	175.715	5986.54	1	1000000008
504.945	211.204	5988.03	1	1000000009
293.129	105.349	5997.74	1	1000000010
14.7473	312.373	5969.01	1	1000000011
104.82	336.171	5968.94	1	1000000012
23.3746	352.669	5971.9	1	1000000013
127.707	343.123	5973.81	1	1000000014
242.766	351.207	5973.78	1	1000000015
96.226	295.602	5979.09	1	1000000016
219.199	334.442	5978.6	1	1000000017
32.3874	355.903	5979.94	1	1000000018
192.524	284.037	5984.28	1	1000000019
202.53	401.815	5983.93	1	1000000020
148.461	450.817	5983.91	1	1000000021
37.6586	469.533	5982.87	1	1000000022
143.756	497.675	5984.14	1	1000000023
28.3092	471.942	5989.05	1	1000000024
57.4558	481.53	5988.61	1	1000000025
81.3556	367.72	5989.36	1	1000000026
210.766	348.829	5992.41	1	1000000027
67.3897	369.793	5992.87	1	1000000028
236.567	399.422	5992.31	1	1000000029
132.969	450.835	5993.41	1	1000000030
29.063	359.708	5995.82	1	1000000031
314.331	326.688	5970.39	1	1000000032
494.898	356.459	5973.98	1	1000000033
350.561	424.939	5976.82	1	1000000034
305.824	381.328	5982.35	1	1000000035
372.454	460.271	5980.76	1	1000000036
263.788	493.007	5981.59	1	1000000037
421.42	430.119	5984.55	1	1000000038
286.475	492.594	5984.63	1	1000000039
338.238	302.091	5990.98	1	1000000040
356.848	449.133	5993.06	1	1000000041
312.062	274.274	5997.59	1	1000000042
264.613	293.859	5996.27	1	1000000043
192.825	125.244	6006.1	1	1000000044
366.328	224.642	6002.12	1	1000000045
312.596	113.754	6007.11	1	1000000046
356.208	117.604	6013.53	1	1000000047
26.7783	455.234	6001.78	1	1000000048
252.134	264.004	6003.4	1	1000000049
84.8248	430.149	6002.74	1	1000000050
43.5258	490.639	6002.46	1	1000000051
199.559	372.422	6006.93	1	1000000052
83.8228	446.4	6008.21	1	1000000053
58.0015	319.78	6011.17	1	1000000054
21.502	323.796	6018.65	1	1000000055
368.358	449.563	6002.5	1	1000000056
401.27	351.914	6017.35	1	1000000057
133.946	55.6568	5973.71	2	1000000000
87.6234	133.1	5976.87	2	1000000001
187.753	228.488	5977.67	2	1000000002
329.949	159.654	5966	2	1000000004
336.692	195.054	5970.53	2	1000000005
378.401	242.577	5972.48	2	1000000006
308.732	204.218	5975.02	2	1000000007
340.333	107.356	5984.18	2	1000000058
280.85	173.665	5985.81	2	1000000008
503.736	209.186	5989.16	2	1000000009
291.98	104.032	5994.9	2	1000000010
104.598	335.267	5968.62	2	1000000012
13.8862	311.542	5969.35	2	1000000011
26.4475	352.2	5971	2	1000000013
127.347	341.937	5973.72	2	1000000014
244.045	349.555	5974.97	2	1000000015
34.2037	351.667	5977.43	2	1000000018
97.9749	292.892	5979.51	2	1000000016
220.238	335.104	5978.82	2	1000000017
38.9588	468.93	5982.72	2	1000000022
192.797	283.302	5985.6	2	1000000019
149.827	450.154	5985.23	2	1000000021
142.882	497.854	5986.37	2	1000000023
83.0725	364.988	5988.36	2	1000000026
28.1316	470.476	5987.92	2	1000000024
58.8458	479.344	5987.55	2	1000000025
211.949	348.356	5990.41	2	1000000027
67.8677	367.301	5992.28	2	1000000028
236.416	399	5992.49	2	1000000029
133.859	450.533	5992.84	2	1000000030
27.8598	357.841	5994.11	2	1000000031
313.851	326.545	5969.77	2	1000000032
494.382	354.238	5974.78	2	1000000033
350.475	423.913	5976.05	2	1000000034
306.522	380.965	5981.43	2	1000000035
372.034	458.296	5980.97	2	1000000036
285.963	491.204	5982.02	2	1000000039
424.23	431.422	5983.55	2	1000000038
339.523	301.623	5992.98	2	1000000040
357.403	445.635	5992.18	2	1000000041
314.862	273.072	5995.54	2	1000000042
265.801	291.455	5995.48	2	1000000043
194.582	124.617	6005.51	2	1000000044
367.883	220.298	6001.25	2	1000000045
312.139	110.889	6004.29	2	1000000046
359.891	114.456	6010.05	2	1000000047
85.162	427.532	6001.85	2	1000000050
40.2093	489.714	6001.85	2	1000000051
252.252	267.271	6003.86	2	1000000049
27.6407	455.284	6002.62	2	1000000048
200.477	369.58	6005.68	2	1000000052
84.9363	443.665	6008.04	2	1000000053
57.6783	316.319	6009.87	2	1000000054
370.264	445.998	6001.79	2	1000000056
401.525	351.228	6016.32	2	1000000057
135.197	53.1637	5972.34	3	1000000000
88.9194	130.818	5976.6	3	1000000001
187.83	225.662	5978.53	3	1000000002
246.246	216.932	5995.52	3	1000000003
331.713	158.769	5966	3	1000000004
338.48	194.007	5970.61	3	1000000005
377.902	242.158	5971.86	3	1000000006
311.362	204.141	5975.27	3	1000000007
340.217	105.446	5984.11	3	1000000058
280.483	172.153	5985.57	3	1000000008
292.907	103.879	5990.48	3	1000000010
505.65	207.269	5989.75	3	1000000009
12.8007	311.481	5968.92	3	1000000011
104.521	334.417	5969.87	3	1000000012
28.2544	351.566	5971.37	3	1000000013
128.003	341.116	5974.49	3	1000000014
35.7233	345.464	5975.79	3	1000000018
244.819	348.246	5975.58	3	1000000015
217.621	334.218	5977.87	3	1000000017
99.5763	289.556	5978.97	3	1000000016
201.995	402.019	5982.27	3	1000000020
40.2259	465.132	5981.98	3	1000000022
142.088	499.655	5983.75	3	1000000023
194.017	282.85	5985.38	3	1000000019
150.124	450.154	5985.32	3	1000000021
20.2752	338.942	5987.62	3	1000000059
84.021	362.793	5988.8	3	1000000026
28.6384	470.274	5987.77	3	1000000024
59.8647	477.079	5987.98	3	1000000025
214.756	347.064	5989.74	3	1000000027
29.7754	357.577	5991.15	3	1000000031
69.3637	366.024	5991.37	3	1000000028
134.386	447.998	5992.97	3	1000000030
234.37	395.233	5993.81	3	1000000029
40.12	487.277	5999.7	3	1000000051
313.804	324.82	5968.7	3	1000000032
493.736	353.353	5974.68	3	1000000033
351.265	421.142	5974.33	3	1000000034
305.852	379.944	5979.62	3	1000000035
372.208	456.085	5979.58	3	1000000036
260.525	491.399	5979.46	3	1000000037
425.453	430.129	5982.26	3	1000000038
285.252	486.707	5980.93	3	1000000039
358.223	442.625	5991.61	3	1000000041
269.624	288.711	5995.25	3	1000000043
340.733	301.676	5994.29	3	1000000040
317.915	273.971	5996.24	3	1000000042
372.385	442.671	6000.01	3	1000000056
195.527	122.016	6004.41	3	1000000044
369.334	218.983	6000.64	3	1000000045
313.363	109.237	6005.5	3	1000000046
361.392	111.614	6006.9	3	1000000047
254.453	151.27	6007.93	3	1000000060
85.6619	426.092	6002.29	3	1000000050
251.081	268.242	6003.48	3	1000000049
28.4654	453.508	6002.93	3	1000000048
198.682	368.754	6006.13	3	1000000052
57.5825	312.785	6008.51	3	1000000054
85.1868	441.29	6007.6	3	1000000053
401.801	348.832	6018.55	3	1000000057
135.11	52.9765	5973.03	4	1000000000
88.1382	129.866	5975.73	4	1000000001
187.912	223.128	5978.72	4	1000000002
246.426	213.827	5997.37	4	1000000003
330.354	159.132	5966	4	1000000004
338.561	192.123	5971.49	4	1000000005
378.255	241.396	5972.54	4	1000000006
311.338	202.5	5975.41	4	1000000007
341.51	107.039	5982.67	4	1000000058
280.624	170.474	5985.49	4	1000000008
292.107	102.193	5989.82	4	1000000010
506.94	203.735	5990.71	4	1000000009
370.968	217.649	5998.31	4	1000000045
12.9309	310.648	5968.87	4	1000000011
103.56	333.687	5970.54	4	1000000012
29.8281	351.101	5971.8	4	1000000013
128.596	340.341	5974.78	4	1000000014
37.136	341.331	5974.2	4	1000000018
244.923	347.46	5974.96	4	1000000015
99.7089	286.53	5977.85	4	1000000016
218.853	332.971	5978.53	4	1000000017
201.693	321.537	5981.33	4	1000000061
40.6687	464.56	5982.17	4	1000000022
193.365	282.471	5984.01	4	1000000019
20.5853	338.13	5984.21	4	1000000059
202.049	401.233	5983.41	4	1000000020
149.308	451.381	5983.54	4	1000000021
141.21	499.871	5984.55	4	1000000023
28.5222	469.061	5988.05	4	1000000024
216.09	346.208	5989.12	4	1000000027
83.3663	361.247	5989.52	4	1000000026
29.7989	355.904	5991.3	4	1000000031
133.712	447.015	5992.44	4	1000000030
64.6914	473.152	5992.79	4	1000000025
69.477	364.447	5993.52	4	1000000028
234.01	394.813	5994.33	4	1000000029
37.5207	487.84	5998.87	4	1000000051
312.84	324.633	5969.69	4	1000000032
352.232	418.711	5974.09	4	1000000034
495.008	350.759	5976.95	4	1000000033
305.542	377.271	5979.5	4	1000000035
373.443	454.688	5978.91	4	1000000036
261.162	491.785	5980.06	4	1000000037
286.049	483.233	5981.21	4	1000000039
427.318	429.974	5982.6	4	1000000038
357.204	438.788	5991.43	4	1000000041
323.982	273.616	5995.27	4	1000000042
341.68	299.819	5995.54	4	1000000040
270.639	284.78	5996.66	4	1000000043
369.505	437.702	5998.38	4	1000000056
196.186	119.747	6004.73	4	1000000044
260.696	215.372	6001.3	4	1000000062
310.988	109.089	6003.85	4	1000000046
362.565	109.71	6007.21	4	1000000047
255.134	150.782	6008.27	4	1000000060
85.2738	424.44	6000.58	4	1000000050
29.6813	454.035	6002.08	4	1000000048
252.403	266.426	6003.54	4	1000000049
85.373	438.203	6007.86	4	1000000053
60.0478	311.826	6009.62	4	1000000054
21.8041	318.282	6017.88	4	1000000055
399.469	506.94	6000.49	4	1000000063
401.569	348.758	6017.39	4	1000000057
135.299	50.007	5973.1	5	1000000000
88.8115	126.719	5976.37	5	1000000001
187.065	219.317	5977.26	5	1000000002
246.06	211.603	5996.54	5	1000000003
332.349	158.414	5966	5	1000000004
340.155	188.737	5972.93	5	1000000005
379.629	240.64	5971.66	5	1000000006
309.733	200.368	5976.86	5	1000000007
340.836	105.306	5983.2	5	1000000058
282.702	168.507	5986.09	5	1000000008
292.022	99.4105	5989.64	5	1000000010
506.94	201.219	5992.35	5	1000000009
372.187	216.912	5997.08	5	1000000045
103.004	332.258	5969.03	5	1000000012
11.3181	310.429	5970.53	5	1000000011
30.7621	351.129	5971.37	5	1000000013
37.0008	339.881	5973.56	5	1000000018
128.346	338.605	5975.2	5	1000000014
245.787	346.34	5974.56	5	1000000015
218.073	333.235	5977.87	5	1000000017
99.9164	285.661	5979.11	5	1000000016
21.1123	335.918	5982.17	5	1000000059
151.16	451.99	5982.4	5	1000000021
43.0163	466.572	5981.39	5	1000000022
193.062	282.591	5983.64	5	1000000019
141.645	499.562	5983.53	5	1000000023
202.29	397.973	5985.76	5	1000000020
216.481	344.25	5987.43	5	1000000027
28.1226	467.613	5987.76	5	1000000024
30.2125	354.012	5991.06	5	1000000031
83.2934	359.752	5991.42	5	1000000026
233.312	392.063	5992.66	5	1000000029
135.491	444.118	5991.59	5	1000000030
71.3807	471.178	5993.32	5	1000000025
70.2688	363.428	5994.37	5	1000000028
40.8871	485.247	5996.72	5	1000000051
311.789	323.997	5968.76	5	1000000032
354.051	419.209	5973.05	5	1000000034
494.168	349.441	5977.44	5	1000000033
306.832	375.339	5979.48	5	1000000035
372.528	454.997	5980.62	5	1000000036
287.433	483.523	5981.96	5	1000000039
260.588	491.257	5981.44	5	1000000037
428.81	429.127	5983.47	5	1000000038
326.095	272.055	5992.99	5	1000000042
357.956	436.135	5992.71	5	1000000041
342.727	298.403	5996.62	5	1000000040
271.58	280.651	5998.37	5	1000000043
369.828	436.08	5998.77	5	1000000056
196.775	118.863	6005.78	5	1000000044
259.148	215.798	6000.85	5	1000000062
310.477	106.552	6003.83	5	1000000046
363.611	107.17	6007.65	5	1000000047
257.515	147.443	6007.78	5	1000000060
252.418	264.744	6001.87	5	1000000049
86.4047	423.45	6001.67	5	1000000050
31.3363	453.899	6000.38	5	1000000048
198.583	365.554	6008.04	5	1000000052
58.8103	308.647	6010.59	5	1000000054
83.6218	433.856	6009.88	5	1000000053
399.251	500.801	6000.3	5	1000000063
403.526	346.418	6016.42	5	1000000057
187.606	216.818	5974.87	6	1000000002
136.955	47.5614	5976.54	6	1000000000
91.1747	125.212	5976.77	6	1000000001
118.164	148.65	5978.38	6	1000000064
244.315	209.627	5995.08	6	1000000003
331.243	155.738	5966	6	1000000004
380.622	239.373	5970.78	6	1000000006
340.467	187.739	5971.56	6	1000000005
308.274	198.129	5977.38	6	1000000007
341.134	103.126	5983.69	6	1000000058
283.139	166.23	5985.6	6	1000000008
292.977	97.4101	5987.46	6	1000000010
506.94	201.048	5992.25	6	1000000009
372.31	214.703	5996.34	6	1000000045
259.497	214.714	5999.63	6	1000000062
12.5166	309.456	5971.3	6	1000000011
102.264	332.128	5972.13	6	1000000012
38.6342	339.453	5973.26	6	1000000018
31.5602	351.742	5971.72	6	1000000013
245.698	346.226	5975.26	6	1000000015
216.005	332.933	5977.15	6	1000000017
129.765	337.99	5976.16	6	1000000014
100.831	284.799	5979.09	6	1000000016
21.3512	335.826	5982.49	6	1000000059
44.9685	466.703	5981.45	6	1000000022
193.099	282.468	5984.57	6	1000000019
151.19	451.759	5983.79	6	1000000021
141.474	500.074	5983.36	6	1000000023
202.894	396.362	5985.34	6	1000000020
215.58	343.501	5987.81	6	1000000027
28.7499	465.846	5988.08	6	1000000024
234.706	393.149	5991.16	6	1000000029
30.1457	353.478	5991.7	6	1000000031
84.9816	359.224	5992.19	6	1000000026
71.4034	361.005	5993.17	6	1000000028
135.525	442.544	5992.51	6	1000000030
73.8938	468.286	5992.98	6	1000000025
41.0145	484.332	5998.88	6	1000000051
310.749	323.018	5967.93	6	1000000032
353.564	417.941	5973.82	6	1000000034
494.553	348.629	5977.46	6	1000000033
307.66	373.754	5978.69	6	1000000035
372.663	455.821	5978.73	6	1000000036
288.881	481.623	5979.93	6	1000000039
430.06	427.281	5983.81	6	1000000038
327.642	272.255	5992.23	6	1000000042
357.729	435.202	5993.18	6	1000000041
347.041	293.345	5995.37	6	1000000040
273.74	279.851	5998.13	6	1000000043
373.322	439.01	5998.15	6	1000000056
401.246	498.214	5998.63	6	1000000063
198.385	116.61	6003.88	6	1000000044
225.065	161.543	6004.57	6	1000000065
232.863	147.366	6007.91	6	1000000066
307.543	103.462	6004.59	6	1000000046
365.541	104.805	6010.82	6	1000000047
253.071	267.418	6002	6	1000000049
88.8728	420.333	6001.96	6	1000000050
31.1432	451.551	6000.38	6	1000000048
198.188	361.69	6008.41	6	1000000052
59.8597	305.787	6009.6	6	1000000054
82.844	431.95	6009.31	6	1000000053
20.825	385.922	6023.2	6	1000000067
406.536	343.932	6014.52	6	1000000057
188.684	214.344	5974.86	7	1000000002
137.218	45.2445	5976.76	7	1000000000
92.48	123.835	5976.79	7	1000000001
118.997	146.749	5977.47	7	1000000064
244.373	210.062	5993.13	7	1000000003
334.031	155.589	5966	7	1000000004
380.473	238.754	5971.09	7	1000000006
341.214	186.107	5972.76	7	1000000005
308.062	197.945	5978.97	7	1000000007
342.298	101.592	5983.04	7	1000000058
292.943	96.3465	5985.96	7	1000000010
286.024	163.424	5986.31	7	1000000008
506.94	200.65	5991.95	7	1000000009
375.505	213.019	5995.35	7	1000000045
260.489	212.688	5997.79	7	1000000062
101.193	330.084	5971.05	7	1000000012
13.6487	308.639	5972.36	7	1000000011
41.0406	337.366	5972.32	7	1000000018
245.939	346.496	5972.36	7	1000000015
32.5831	350.518	5972.64	7	1000000013
128.788	335.127	5975.9	7	1000000014
214.789	330.802	5977.1	7	1000000017
193.317	281.887	5982.44	7	1000000019
99.22	284.935	5981.15	7	1000000016
201.606	317.936	5980.79	7	1000000061
22.2299	334.252	5981.78	7	1000000059
46.651	467.553	5981.34	7	1000000022
141.004	499.956	5983.55	7	1000000023
213.607	342.781	5986.52	7	1000000027
201.619	394.167	5985.24	7	1000000020
151.694	452.814	5985.45	7	1000000021
-5.96046e-08	308.748	5987.17	7	1000000068
25.6891	464.69	5988.21	7	1000000024
31.0945	352.23	5989.18	7	1000000031
234.511	391.172	5989.98	7	1000000029
85.4075	356.597	5993.4	7	1000000026
136.688	441.552	5992.71	7	1000000030
76.1704	464.801	5992.62	7	1000000025
71.9569	359.028	5994.57	7	1000000028
42.4075	483.434	5999.22	7	1000000051
311.243	320.909	5969.61	7	1000000032
492.315	348.614	5974.93	7	1000000033
354.422	417.312	5974.15	7	1000000034
308.127	371.175	5977.39	7	1000000035
371.332	455.173	5978.79	7	1000000036
288.119	482.032	5979.9	7	1000000039
257.002	490.773	5980.53	7	1000000037
431.939	425.674	5983.48	7	1000000038
330.62	272.498	5991.7	7	1000000042
347.862	291.347	5995.32	7	1000000040
356.498	435.239	5994.29	7	1000000041
376.734	443.056	5996.67	7	1000000056
402.101	495.645	5996.79	7	1000000063
275.126	278.112	5998.89	7	1000000043
224.711	160.71	6004	7	1000000065
197.628	114.377	6005.13	7	1000000044
233.02	145.578	6005.06	7	1000000066
307.913	101.469	6003.83	7	1000000046
259.768	145.76	6006.59	7	1000000060
367.218	103.158	6011.6	7	1000000047
88.9226	416.502	6001.09	7	1000000050
28.6345	450.03	6001.64	7	1000000048
198.612	360.186	6006.3	7	1000000052
63.3348	304.065	6008.52	7	1000000054
81.4529	427.694	6008.09	7	1000000053
21.5096	314.866	6015.14	7	1000000055
254.225	267.65	6002.09	7	1000000049
408.099	341.905	6013.51	7	1000000057
189.506	211.507	5974.26	8	1000000002
92.8083	122.435	5976.79	8	1000000001
117.949	144.857	5977.98	8	1000000064
137.049	46.0125	5978.89	8	1000000000
242.704	207.732	5991.63	8	1000000003
335.81	156.341	5966	8	1000000004
379.827	237.617	5971.26	8	1000000006
343.101	185.133	5973.8	8	1000000005
310.472	195.699	5976.59	8	1000000007
343.775	102.677	5984.64	8	1000000058
293.644	93.9324	5985.37	8	1000000010
286.374	162.389	5984.98	8	1000000008
506.94	202.162	5991.46	8	1000000009
379.093	211.985	5994.09	8	1000000045
259.833	210.084	5999.07	8	1000000062
101.558	329.458	5971.16	8	1000000012
12.3118	306.827	5972.68	8	1000000011
41.4477	336.954	5972.15	8	1000000018
242.826	345.048	5972.4	8	1000000015
34.3919	350.207	5973.41	8	1000000013
215.209	330.038	5977.42	8	1000000017
127.895	334.479	5976.1	8	1000000014
97.6705	284.543	5982.48	8	1000000016
22.0146	334.298	5981.6	8	1000000059
48.7505	468.062	5980.39	8	1000000022
194.222	281.037	5982.79	8	1000000019
202.335	392.176	5984.53	8	1000000020
141.07	500.95	5983.09	8	1000000023
-5.96046e-08	308.811	5985.34	8	1000000068
212.851	341.346	5986.01	8	1000000027
97.5122	310.592	5988.55	8	1000000069
152.124	453.478	5987.89	8	1000000021
23.7845	463.255	5988.62	8	1000000024
30.12	353.388	5989.81	8	1000000031
235.505	389.584	5990.5	8	1000000029
78.9005	462.362	5990.43	8	1000000025
85.4576	355.999	5993.39	8	1000000026
135.952	439.857	5993.46	8	1000000030
72.3427	358.296	5995.05	8	1000000028
91.5359	413.31	5999.82	8	1000000050
310.494	320.573	5969.11	8	1000000032
354.068	416.575	5971.99	8	1000000034
492.832	348.037	5974.37	8	1000000033
309.081	369.828	5977.47	8	1000000035
369.714	454.599	5978.11	8	1000000036
434.734	425.549	5981.19	8	1000000038
288.243	484.982	5981.66	8	1000000039
332.582	272.435	5990.64	8	1000000042
347.87	289.912	5994.82	8	1000000040
355.472	434.044	5994.22	8	1000000041
380.365	444.168	5994.76	8	1000000056
401.615	492.741	5996.6	8	1000000063
273.302	280.669	5999.65	8	1000000043
226.027	159.386	6004.43	8	1000000065
198.753	111.54	6006.39	8	1000000044
232.923	144.542	6005.25	8	1000000066
307.838	98.0023	6003.89	8	1000000046
258.957	144.814	6004.44	8	1000000060
369.968	100.308	6011.44	8	1000000047
26.8251	449.252	6000.97	8	1000000048
40.0061	483.414	6000.36	8	1000000051
66.9963	300.77	6005.02	8	1000000054
197.551	357.199	6006.34	8	1000000052
81.0279	425.829	6007.14	8	1000000053
21.7354	312.127	6015.75	8	1000000055
256.245	267.34	6001.2	8	1000000049
409.457	341.644	6010.65	8	1000000057
189.715	208.134	5973.04	9	1000000002
93.251	119.242	5976.39	9	1000000001
118.629	144.331	5978.88	9	1000000064
243.423	206.412	5993.75	9	1000000003
334.119	155.192	5966	9	1000000004
343.273	184.785	5972.46	9	1000000005
382.818	237.392	5971.81	9	1000000006
312.017	195.185	5977.64	9	1000000007
286.964	159.177	5983.92	9	1000000008
344.678	99.9397	5986.02	9	1000000058
293.433	91.6955	5987.76	9	1000000010
506.94	200.522	5988.76	9	1000000009
381.193	210.736	5991.47	9	1000000045
261.436	208.968	5997.34	9	1000000062
101.087	327.197	5971.03	9	1000000012
11.3056	305.366	5972.84	9	1000000011
42.5277	334.598	5972.38	9	1000000018
241.976	345.244	5972.33	9	1000000015
127.687	333.417	5974.58	9	1000000014
36.075	348.046	5974.71	9	1000000013
215.179	329.806	5977.67	9	1000000017
202.723	317.508	5979.14	9	1000000061
24.4346	332.083	5981.25	9	1000000059
49.4925	467.738	5980.47	9	1000000022
193.151	282.147	5983.71	9	1000000019
96.8774	283.843	5984.24	9	1000000016
203.416	390.178	5984.25	9	1000000020
141.223	500.015	5983.72	9	1000000023
-5.96046e-08	309.684	5985.41	9	1000000068
212.182	342.403	5985.3	9	1000000027
31.6295	350.337	5987.82	9	1000000031
236.703	389.446	5988.58	9	1000000029
22.3806	460.762	5988.75	9	1000000024
95.836	308.105	5989.39	9	1000000069
150.897	452.667	5989.98	9	1000000021
79.9334	458.483	5990.41	9	1000000025
72.7954	356.094	5993.95	9	1000000028
86.5386	355.185	5994.26	9	1000000026
136.875	437.203	5994.48	9	1000000030
94.2234	410.487	5997.12	9	1000000050
309.392	318.565	5968.83	9	1000000032
354.693	414.825	5970.61	9	1000000034
491.382	348.242	5972.78	9	1000000033
309.926	367.801	5977.96	9	1000000035
367.11	454.63	5979	9	1000000036
434.644	425.745	5981.8	9	1000000038
289.519	485.183	5982.87	9	1000000039
256.378	491.439	5983.32	9	1000000037
333.726	270.421	5990.02	9	1000000042
379.526	444.763	5993.24	9	1000000056
354.581	431.96	5995.34	9	1000000041
403.362	490.798	5995.28	9	1000000063
348.094	291.006	5997	9	1000000040
232.76	141.373	6004.23	9	1000000066
226.098	156.95	6002.66	9	1000000065
198.596	110.123	6007.79	9	1000000044
308.469	97.0589	6004.05	9	1000000046
259.199	139.777	6005.48	9	1000000060
371.682	100.026	6010.32	9	1000000047
24.3072	447.749	6000.17	9	1000000048
70.449	300.315	6003.66	9	1000000054
198.21	356.208	6003.48	9	1000000052
40.7205	482.493	6004.08	9	1000000051
82.967	423.828	6007.68	9	1000000053
18.483	310.958	6015.96	9	1000000055
20.0336	381.498	6019.97	9	1000000067
257.522	265.975	6000.15	9	1000000049
272.828	281.204	6000.39	9	1000000043
411.199	339.354	6008.76	9	1000000057
191.014	204.916	5970.37	10	1000000002
92.3629	116.506	5974.92	10	1000000001
138.549	41.8104	5979.27	10	1000000000
120.377	143.664	5980.05	10	1000000064
100.865	53.7441	5980.64	10	1000000070
243.918	204.861	5994.28	10	1000000003
334.28	152.863	5966	10	1000000004
343.495	182.937	5971.06	10	1000000005
383.257	236.501	5971.49	10	1000000006
313.839	193.06	5975.71	10	1000000007
287.545	157.806	5982.73	10	1000000008
292.912	89.8647	5986.42	10	1000000010
506.94	199.393	5985.17	10	1000000009
344.458	99.5415	5987.7	10	1000000058
382.208	209.591	5990.91	10	1000000045
310.81	202.168	5992.76	10	1000000071
260.889	208.593	5997.97	10	1000000062
101.153	326.031	5970.37	10	1000000012
11.627	304.709	5972.88	10	1000000011
44.0987	332.406	5972.52	10	1000000018
242.137	342.778	5972.13	10	1000000015
127.158	332.81	5974.65	10	1000000014
37.1169	345.178	5974.94	10	1000000013
214.795	328.538	5978.25	10	1000000017
24.7315	329.999	5980.23	10	1000000059
50.7346	467.343	5981.12	10	1000000022
194.668	282.485	5984.5	10	1000000019
97.6281	307.905	5984.41	10	1000000069
202.874	386.7	5984.09	10	1000000020
140.351	498.654	5983.79	10	1000000023
96.211	284.866	5986.05	10	1000000016
-5.96046e-08	310.258	5984.94	10	1000000068
211.436	341.97	5985.23	10	1000000027
33.2035	349.117	5985.91	10	1000000031
150.963	450.259	5988.61	10	1000000021
237.291	387.941	5989.32	10	1000000029
81.5287	455.611	5990.92	10	1000000025
20.5032	458.956	5990.61	10	1000000024
73.883	353.146	5993.19	10	1000000028
86.2557	354.24	5992.83	10	1000000026
137.491	436.769	5994.81	10	1000000030
96.1985	407.085	5996.54	10	1000000050
20.1051	446.792	5999.56	10	1000000048
309.992	316.222	5967.64	10	1000000032
355.747	415.332	5970.92	10	1000000034
490.992	346.989	5973.28	10	1000000033
308.918	363.834	5975.63	10	1000000035
368.455	457.552	5979.05	10	1000000036
433.594	423.755	5981.74	10	1000000038
289.32	484.309	5980.94	10	1000000039
334.666	268.803	5990.59	10	1000000042
355.793	431.236	5993.2	10	1000000041
378.921	443.092	5991.73	10	1000000056
403.356	487.309	5992.37	10	1000000063
348.374	287.595	5997.16	10	1000000040
226.89	154.75	6001.53	10	1000000065
231.612	138.098	6003.34	10	1000000066
200.482	109.498	6010.21	10	1000000044
306.618	94.5866	6005.45	10	1000000046
260.148	138.58	6005.19	10	1000000060
371.913	98.8852	6009.92	10	1000000047
36.4369	421.31	6000.38	10	1000000072
72.0657	299.153	6002.95	10	1000000054
200.201	355.274	6003.25	10	1000000052
42.2547	481.346	6004.1	10	1000000051
16.5166	310.031	6017.26	10	1000000055
19.4346	381.172	6016.08	10	1000000067
257.52	263.386	6000.67	10	1000000049
276.106	281.512	6001.07	10	1000000043
411.618	337.814	6008.35	10	1000000057
191.236	203.499	5969.97	11	1000000002
92.6938	115.794	5975.46	11	1000000001
137.289	38.7119	5977.19	11	1000000000
101.947	51.5971	5979.38	11	1000000070
119.823	143.129	5979.43	11	1000000064
245.277	202.576	5993.72	11	1000000003
206.134	106.077	5998.56	11	1000000073
337.973	153.445	5966	11	1000000004
344.491	182.88	5971.32	11	1000000005
382.963	235.515	5970.37	11	1000000006
314.831	191.923	5976.58	11	1000000007
506.94	196.796	5981.96	11	1000000009
293.091	90.1483	5984.44	11	1000000010
288.486	155.527	5984.01	11	1000000008
346.991	97.2356	5988.74	11	1000000058
381.824	208.666	5991.24	11	1000000045
312.292	203.55	5992.11	11	1000000071
262.494	206.241	5999.24	11	1000000062
102.097	324.273	5970.53	11	1000000012
11.93	304.075	5973.47	11	1000000011
45.309	329.434	5972.77	11	1000000018
127.359	332.046	5973.69	11	1000000014
242.81	341.32	5973.23	11	1000000015
40.2344	343.36	5975.11	11	1000000013
203.654	317.685	5977.43	11	1000000061
26.6375	327.434	5979.02	11	1000000059
216.002	327.314	5978.66	11	1000000017
51.0762	466.625	5980.9	11	1000000022
195.807	281.812	5984.25	11	1000000019
-5.96046e-08	310.657	5983.63	11	1000000068
202.127	383.778	5984.39	11	1000000020
140.62	499.509	5983.74	11	1000000023
96.9786	305.114	5985.82	11	1000000069
212.208	340.69	5985.71	11	1000000027
33.1753	350.005	5985.66	11	1000000031
95.6643	284.972	5987.67	11	1000000016
239.222	389.298	5988.23	11	1000000029
151.265	449.895	5989.68	11	1000000021
73.571	350.799	5991.54	11	1000000028
81.8517	452.641	5991.62	11	1000000025
19.5513	459.503	5992.99	11	1000000024
85.3169	351.993	5993.8	11	1000000026
97.0545	404.185	5997.01	11	1000000050
138.994	434.667	5995.82	11	1000000030
308.932	314.827	5967.64	11	1000000032
358.304	415.277	5971.05	11	1000000034
489.642	345.586	5973.36	11	1000000033
308.236	361.546	5976.31	11	1000000035
368.816	457.616	5978.83	11	1000000036
288.585	483.564	5979.46	11	1000000039
257.398	489.917	5979.54	11	1000000037
434.77	423.184	5980.64	11	1000000038
335.633	268.038	5991.15	11	1000000042
380.525	443.788	5990.21	11	1000000056
356.618	427.478	5992.71	11	1000000041
403.069	484.624	5991.78	11	1000000063
348.345	286.548	5997.81	11	1000000040
233.382	135.627	6003.22	11	1000000066
226.32	153.842	6002.57	11	1000000065
202.386	106.565	6011.02	11	1000000044
306.101	92.4356	6006.36	11	1000000046
261.055	138.618	6004.92	11	1000000060
372.611	95.2985	6010.47	11	1000000047
427.373	168.777	6023.2	11	1000000074
200.54	354.004	6001.96	11	1000000052
38.5517	420.479	6000.41	11	1000000072
19.1027	447.195	6000.56	11	1000000048
42.6906	481.001	6001.95	11	1000000051
72.4303	298.724	6002.61	11	1000000054
83.6096	422.575	6005.18	11	1000000053
248.279	397.312	6008.59	11	1000000075
16.7129	309.566	6016.41	11	1000000055
18.2963	379.789	6016.43	11	1000000067
256.592	260.98	6001.51	11	1000000049
277.95	279.149	6001.35	11	1000000043
411.466	332.862	6008.56	11	1000000057
192.889	201.615	5967.45	12	1000000002
91.6213	113.408	5972.6	12	1000000001
101.874	50.1283	5975.51	12	1000000070
137.085	35.5782	5978.96	12	1000000000
244.884	199.361	5992.23	12	1000000003
204.357	103.931	5996.54	12	1000000073
337.116	152.389	5966	12	1000000004
382.591	234.29	5969.18	12	1000000006
345.966	181.004	5970.72	12	1000000005
316.947	191.98	5975.52	12	1000000007
504.153	197.318	5981.07	12	1000000009
294.459	88.2937	5984.73	12	1000000010
346.789	95.2445	5986.35	12	1000000058
289.452	153.697	5985.38	12	1000000008
313.574	201.269	5990.44	12	1000000071
381.561	208.928	5991.42	12	1000000045
381.758	128.164	5997.57	12	1000000076
264.151	204.52	5999.56	12	1000000062
11.5485	304.475	5973	12	1000000011
103.894	323.388	5971.78	12	1000000012
49.2568	325.213	5973.16	12	1000000018
243.084	340.061	5972.71	12	1000000015
43.7501	342.084	5973.15	12	1000000013
127.532	329.499	5974.47	12	1000000014
26.5553	325.756	5977.76	12	1000000059
216.606	326.173	5978.26	12	1000000017
33.3359	348.589	5981.76	12	1000000031
50.4837	468.028	5981.26	12	1000000022
195.945	280.844	5983.79	12	1000000019
96.3482	304.024	5983.15	12	1000000069
-5.96046e-08	310.839	5983.8	12	1000000068
140.374	498.917	5983.51	12	1000000023
214.661	340.24	5985.71	12	1000000027
204.042	382.308	5985.62	12	1000000020
241.027	389.151	5986.95	12	1000000029
98.1513	284.108	5990.56	12	1000000016
73.1767	347.656	5990.71	12	1000000028
151.83	448.077	5989.2	12	1000000021
85.1337	350.105	5992.62	12	1000000026
82.8782	450.754	5992.77	12	1000000025
97.7235	401.8	5995.51	12	1000000050
140.083	433.679	5995.08	12	1000000030
19.5387	459.967	5994.45	12	1000000024
72.7978	296.591	5999.69	12	1000000054
40.857	419.635	5999.2	12	1000000072
308.529	316.391	5967.73	12	1000000032
360.252	415.509	5970.52	12	1000000034
490.117	342.958	5974.38	12	1000000033
307.512	362.634	5975.15	12	1000000035
258.536	488.545	5978.03	12	1000000037
369.808	456.956	5980.08	12	1000000036
292.769	482.244	5979.63	12	1000000039
438.35	422.854	5980.98	12	1000000038
380.567	444.472	5989.71	12	1000000056
403.267	481.238	5990.46	12	1000000063
337.83	266.553	5992.19	12	1000000042
356.542	423.799	5991.83	12	1000000041
258.802	261.003	5998.79	12	1000000049
349.67	285.064	5997.9	12	1000000040
228.91	149.74	6001.13	12	1000000065
233.058	134.32	6003.68	12	1000000066
170.451	109.971	6006.55	12	1000000077
202.87	105.299	6010.63	12	1000000044
260.718	137.355	6003.24	12	1000000060
304.052	90.2082	6005.03	12	1000000046
321.182	128.683	6005.73	12	1000000078
374.404	92.2451	6010.94	12	1000000047
429.846	165.662	6018.64	12	1000000074
17.7414	446.608	6001.65	12	1000000048
42.1605	479.067	6002.08	12	1000000051
90.0746	506.94	6000.47	12	1000000079
199.942	350.624	6003.11	12	1000000052
59.5062	506.94	6003.78	12	1000000080
85.239	421.096	6005.07	12	1000000053
241.915	393.382	6009.39	12	1000000075
19.6815	307.429	6012.61	12	1000000055
19.7454	377.198	6014.26	12	1000000067
280.726	277.717	6003.36	12	1000000043
412.9	332.709	6006.24	12	1000000057
191.713	199.696	5966	13	1000000002
91.8761	112.05	5971.97	13	1000000001
137.159	34.5668	5977.72	13	1000000000
102.079	48.4547	5978.6	13	1000000070
122.712	141.677	5982.29	13	1000000064
243.952	198.385	5990.64	13	1000000003
204.04	103.999	5994.5	13	1000000073
340.048	149.261	5966	13	1000000004
382.163	233.394	5968.02	13	1000000006
348.335	179.723	5971.3	13	1000000005
318.659	189.143	5977.29	13	1000000007
503.916	195.469	5980.9	13	1000000009
294.719	86.9789	5983.85	13	1000000010
284.959	178.94	5982.85	13	1000000081
291.191	152.496	5985.75	13	1000000008
348.556	93.311	5987.46	13	1000000058
314.391	195.997	5987.67	13	1000000071
382.529	209.416	5990.47	13	1000000045
262.959	203.327	5998.44	13	1000000062
103.243	322.373	5970.13	13	1000000012
10.5923	302.906	5973.48	13	1000000011
50.5166	321.799	5972.96	13	1000000018
126.251	327.877	5973.17	13	1000000014
242.526	337.901	5973.26	13	1000000015
44.9908	341.285	5973.31	13	1000000013
27.5223	321.855	5977.08	13	1000000059
97.136	303.848	5980.21	13	1000000069
215.486	323.787	5978.72	13	1000000017
32.1475	346.005	5981.22	13	1000000031
51.0769	469.057	5981.73	13	1000000022
195.042	278.842	5983.32	13	1000000019
-5.96046e-08	309.234	5983.17	13	1000000068
203.056	380.075	5983.77	13	1000000020
141.304	498.289	5983.73	13	1000000023
214.004	337.896	5986.56	13	1000000027
242.348	387.326	5985.68	13	1000000029
153.076	446.793	5988.84	13	1000000021
98.5625	283.077	5989.37	13	1000000016
73.3011	346.286	5991.11	13	1000000028
87.6105	347.385	5992.94	13	1000000026
84.0781	449.04	5992.43	13	1000000025
142.106	431.723	5994.62	13	1000000030
18.6097	460.429	5994.39	13	1000000024
99.3073	398.847	5995.76	13	1000000050
41.6324	417.197	5997.11	13	1000000072
309.461	315.164	5967.82	13	1000000032
363.246	415.494	5970.03	13	1000000034
491.051	341.459	5973.96	13	1000000033
307.183	363.103	5974.65	13	1000000035
437.078	423.444	5979.27	13	1000000038
370.389	456.944	5979.91	13	1000000036
293.977	480.469	5980.16	13	1000000039
260.527	488.609	5978.8	13	1000000037
382.377	445.458	5988.7	13	1000000056
357.681	422.482	5990.96	13	1000000041
403.43	479.821	5989.77	13	1000000063
337.473	265.75	5992.93	13	1000000042
260.448	259.548	5998.84	13	1000000049
349.756	284.864	5999.62	13	1000000040
230.517	147.403	6002.02	13	1000000065
234.369	132.291	6002.93	13	1000000066
204.488	102.537	6008.66	13	1000000044
384.241	125.169	6001.3	13	1000000076
321.495	128.533	6003.81	13	1000000078
261.097	137.884	6003.34	13	1000000060
302.376	87.9903	6004.77	13	1000000046
379.847	91.5257	6010.65	13	1000000047
433.635	166.14	6018.5	13	1000000074
73.0491	296.11	6000.37	13	1000000054
89.5207	506.94	6000.59	13	1000000079
85.9326	420.122	6004.04	13	1000000053
17.6835	446.836	6002.68	13	1000000048
42.6264	479.479	6004.5	13	1000000051
59.1864	506.94	6003.37	13	1000000080
199.008	348.304	6004.62	13	1000000052
237.721	387.903	6006.83	13	1000000075
19.4993	306.136	6011.44	13	1000000055
21.1874	374.726	6014.88	13	1000000067
282.471	278.34	6004.24	13	1000000043
410.354	332.782	6006.56	13	1000000057
190.414	198.335	5966	14	1000000002
91.9535	111.558	5970.68	14	1000000001
136.833	30.5448	5976.28	14	1000000000
102.758	47.1639	5977.06	14	1000000070
205.316	104.759	5991.23	14	1000000073
244.257	194.801	5992.1	14	1000000003
340.337	149.824	5966	14	1000000004
348.929	180.531	5971.21	14	1000000005
382.995	233.374	5969.69	14	1000000006
321.316	189.54	5978.57	14	1000000007
503.597	194.733	5980.18	14	1000000009
296.18	85.1974	5981.96	14	1000000010
349.06	93.2443	5985.56	14	1000000058
290.896	151.28	5986.43	14	1000000008
312.948	193.006	5985.38	14	1000000071
381.843	210.034	5991.68	14	1000000045
263.829	202.273	5997.56	14	1000000062
387.253	124.706	5998.84	14	1000000076
101.922	321.591	5971.13	14	1000000012
10.36	302.488	5973.28	14	1000000011
50.8846	321.065	5973.23	14	1000000018
204.069	313.658	5975.3	14	1000000061
125.796	327.273	5974.81	14	1000000014
240.715	337.445	5974.5	14	1000000015
47.2796	341.94	5974.01	14	1000000013
28.5488	320.298	5977.74	14	1000000059
96.4055	303.46	5978.92	14	1000000069
32.3256	345.485	5979.87	14	1000000031
-5.96046e-08	307.945	5981.65	14	1000000068
216.327	323.554	5980.5	14	1000000017
203.992	377.511	5981.98	14	1000000020
50.4227	468.804	5981.94	14	1000000022
195.275	276.487	5983.52	14	1000000019
139.558	497.883	5983.13	14	1000000023
213.11	338.616	5986.29	14	1000000027
242.042	385.919	5985.05	14	1000000029
99.1035	281.793	5988.35	14	1000000016
152.521	445.906	5988.53	14	1000000021
74.1599	343.97	5991.88	14	1000000028
143.496	431.561	5992.44	14	1000000030
83.3042	447.121	5992.55	14	1000000025
87.4487	345.863	5994.08	14	1000000026
99.1497	395.974	5996.41	14	1000000050
42.4018	416.316	5996.43	14	1000000072
18.1658	461.655	5996.28	14	1000000024
73.0304	293.406	5998.75	14	1000000054
308.608	313.209	5966	14	1000000032
365.286	415.752	5970.72	14	1000000034
490.675	340.315	5975.65	14	1000000033
306.554	361.193	5974.17	14	1000000035
438.883	424.295	5980.07	14	1000000038
259.108	486.835	5978.29	14	1000000037
371.227	456.887	5981.45	14	1000000036
295.404	479.693	5981.04	14	1000000039
451.138	506.94	5982.98	14	1000000082
358.072	419.992	5990.82	14	1000000041
384.882	445.238	5991.04	14	1000000056
405.671	476.99	5989.64	14	1000000063
339.077	265.872	5991.91	14	1000000042
261.22	260.858	5996.48	14	1000000049
229.971	143.995	6001.92	14	1000000065
236.383	129.853	6002.85	14	1000000066
206.473	100.126	6008.55	14	1000000044
169.953	106.724	6007.88	14	1000000077
261.282	138.565	6002.05	14	1000000060
300.427	85.8117	6002.59	14	1000000046
321.439	127.253	6003.76	14	1000000078
379.803	87.8173	6011.99	14	1000000047
436.435	162.203	6021.45	14	1000000074
58.5219	506.94	6000.22	14	1000000080
91.3172	506.94	6001.13	14	1000000079
86.4043	417.66	6003.67	14	1000000053
16.7347	443.638	6004.27	14	1000000048
41.1863	477.473	6003.14	14	1000000051
237.518	385.995	6006.8	14	1000000075
18.3405	304.375	6012.13	14	1000000055
22.1442	373.89	6015.12	14	1000000067
350.241	284.093	6001.11	14	1000000040
284.077	276.148	6003.99	14	1000000043
411.164	329.84	6005.89	14	1000000057
189.836	197.546	5966	15	1000000002
92.2097	109.765	5972.51	15	1000000001
101.45	45.7464	5974.61	15	1000000070
138.014	30.2746	5977.08	15	1000000000
123.397	138.463	5979.23	15	1000000064
53.4695	218.926	5978.94	15	1000000083
243.793	190.898	5992.98	15	1000000003
340.244	148.681	5966	15	1000000004
382.073	231.613	5970.38	15	1000000006
349.764	180.731	5972.46	15	1000000005
323.682	187.853	5976.96	15	1000000007
287.742	180.633	5981.92	15	1000000081
506.94	193.017	5980.65	15	1000000009
295.732	83.6774	5982.72	15	1000000010
312.5	190.998	5983.24	15	1000000071
290.276	149.657	5986.43	15	1000000008
349.769	91.959	5987.91	15	1000000058
380.202	210.309	5990.47	15	1000000045
312.818	199.496	5994.92	15	1000000084
264.467	200.883	5996.78	15	1000000062
387.672	123.119	5998.72	15	1000000076
100.982	321.118	5971.29	15	1000000012
10.7769	302.488	5973.09	15	1000000011
205.597	312.839	5973.92	15	1000000061
51.0909	318.835	5973.91	15	1000000018
125.084	326.334	5974.54	15	1000000014
241.326	337.162	5974.68	15	1000000015
50.5099	342.937	5975.16	15	1000000013
95.6667	303.218	5976.99	15	1000000069
29.9051	320.066	5979.46	15	1000000059
216.992	321.616	5978.25	15	1000000017
196.835	274.708	5981.82	15	1000000019
33.5889	343.692	5981.94	15	1000000085
-5.96046e-08	307.164	5983.42	15	1000000068
214.537	338.601	5984.43	15	1000000027
51.0578	468.777	5982.61	15	1000000022
139.451	495.814	5983.2	15	1000000023
242.016	384.947	5985.92	15	1000000029
97.7201	281.074	5987.53	15	1000000016
74.2093	341.251	5990.21	15	1000000028
154.552	443.816	5989.57	15	1000000021
44.5022	415.947	5992.99	15	1000000072
87.4181	345.799	5994.12	15	1000000026
143.608	431.006	5994.64	15	1000000030
82.0429	441.909	5994.61	15	1000000025
73.4115	291.604	5997.14	15	1000000054
99.3083	395.945	5996.63	15	1000000050
18.0111	459.598	5996.96	15	1000000024
57.4507	506.94	5998.43	15	1000000080
307.514	312.519	5966	15	1000000032
365.374	415.267	5968.67	15	1000000034
307.836	357.383	5975.08	15	1000000035
489.733	341.81	5976.37	15	1000000033
259.549	485.393	5978.88	15	1000000037
438.697	421.964	5981.79	15	1000000038
372.203	458.73	5980.67	15	1000000036
451.473	506.94	5981.79	15	1000000082
296.931	477.639	5982.8	15	1000000039
359.502	418.726	5986.71	15	1000000041
406.737	474.484	5988.55	15	1000000063
340.127	266.197	5991.03	15	1000000042
387.108	445.929	5991.15	15	1000000056
262.118	259.142	5995.44	15	1000000049
238.099	129.051	6003.35	15	1000000066
231.78	142.521	6002.94	15	1000000065
208.478	97.616	6007.38	15	1000000044
170.153	103.574	6008.25	15	1000000077
299.22	83.4167	6001.01	15	1000000046
321.735	123.993	6002.79	15	1000000078
262.217	139.134	6002.36	15	1000000060
383.487	84.7001	6013.93	15	1000000047
439.903	156.619	6023.2	15	1000000074
93.913	500.745	6002.08	15	1000000079
197.997	342.277	6003.28	15	1000000052
238.857	385.833	6004.32	15	1000000075
87.688	416.79	6003.61	15	1000000053
40.5328	475.557	6003.63	15	1000000051
16.801	440.398	6005.04	15	1000000048
17.8545	303.695	6010.99	15	1000000055
21.9273	372.32	6014.17	15	1000000067
43.7227	481.201	6023.2	15	1000000086
350.257	282.036	6002	15	1000000040
284.632	273.692	6004.04	15	1000000043
412.741	329.324	6004.06	15	1000000057
189.616	196.292	5966	16	1000000002
93.518	108.078	5971.17	16	1000000001
101.163	44.6371	5977.74	16	1000000070
52.9293	218.712	5977.35	16	1000000083
206.902	100.115	5991.98	16	1000000073
244.637	189.59	5992.69	16	1000000003
340.631	146.812	5966	16	1000000004
382.304	230.61	5968.28	16	1000000006
349.354	178.98	5973.07	16	1000000005
288.96	179.201	5980.18	16	1000000081
323.74	184.651	5978.45	16	1000000007
295.786	81.1643	5981.42	16	1000000010
313.33	190.298	5981.51	16	1000000071
506.94	192.9	5981.92	16	1000000009
289.419	148.917	5986.21	16	1000000008
350.933	90.0135	5988.14	16	1000000058
380.25	209.714	5989.47	16	1000000045
311.961	199.556	5993.26	16	1000000084
268.472	197.791	5996.35	16	1000000062
387.389	120.033	5998.45	16	1000000076
99.5951	319.889	5970.79	16	1000000012
11.2495	300.038	5973.66	16	1000000011
202.696	310.915	5974.31	16	1000000061
50.8546	316.025	5974.18	16	1000000018
124.472	325.569	5974.92	16	1000000014
240.335	336.437	5975.48	16	1000000015
51.3145	343.033	5974.87	16	1000000013
94.5762	301.95	5976.88	16	1000000069
34.7935	339.673	5977.64	16	1000000031
217.934	318.792	5979.36	16	1000000017
195.594	272.509	5982.37	16	1000000019
-5.96046e-08	307.021	5982.03	16	1000000068
30.0553	318.897	5981.28	16	1000000059
31.5077	347.152	5981.37	16	1000000085
205.243	374.714	5981.09	16	1000000020
52.4678	467.002	5984.38	16	1000000022
139.738	493.929	5982.65	16	1000000023
214.332	337.468	5985.83	16	1000000027
241.801	383.431	5986.1	16	1000000029
96.0892	281.311	5987.89	16	1000000016
157.528	443.034	5987.44	16	1000000021
73.8165	338.071	5990.61	16	1000000028
46.8947	414.935	5991.69	16	1000000072
145.269	429.705	5993.23	16	1000000030
87.065	344.501	5993.57	16	1000000026
100.728	394.614	5994.88	16	1000000050
73.4297	289.81	5996.38	16	1000000054
82.3798	438.068	5996.13	16	1000000025
17.2357	461.112	5998.13	16	1000000024
55.7235	506.94	5998.23	16	1000000080
307.485	311.139	5966	16	1000000032
366.316	416.037	5970.79	16	1000000034
308.221	354.973	5974.25	16	1000000035
488.091	340.567	5977.06	16	1000000033
260.278	484.816	5978.07	16	1000000037
372.018	459.187	5979.41	16	1000000036
439.245	421.187	5982.11	16	1000000038
453.284	506.94	5982.15	16	1000000082
298.383	474.132	5983.76	16	1000000039
359.002	416.049	5985.64	16	1000000041
343.648	265.579	5990.54	16	1000000042
407.584	471.117	5990.83	16	1000000063
390.479	444.097	5993.21	16	1000000056
262.08	257.434	5994.75	16	1000000049
230.522	139.872	6000.92	16	1000000065
238.856	127.788	6003.2	16	1000000066
210.689	96.8991	6006.85	16	1000000044
170.808	101.458	6007.01	16	1000000077
299.349	82.1335	6001.58	16	1000000046
264.079	136.902	6001.77	16	1000000060
320.669	122.65	6002.54	16	1000000078
387.069	82.4139	6013.87	16	1000000047
443.49	152.65	6020.74	16	1000000074
89.45	414.891	6002.09	16	1000000053
-5.96046e-08	440.855	6000.72	16	1000000087
197.553	342.834	6003.58	16	1000000052
40.3389	474.417	6002.92	16	1000000051
95.0952	498.334	6003.25	16	1000000079
16.2513	438.285	6005.85	16	1000000048
240.626	386.703	6006.78	16	1000000075
18.3054	304.24	6011.84	16	1000000055
22.5207	371.668	6012.84	16	1000000067
44.9828	479.079	6023.2	16	1000000086
414.824	327.194	6002.13	16	1000000057
286.542	272.923	6003.54	16	1000000043
351.202	278.948	6003.92	16	1000000040
191.129	196.382	5966	17	1000000002
93.818	106.735	5971.22	17	1000000001
102.553	43.2742	5977.25	17	1000000070
53.5733	215.681	5976.51	17	1000000083
138.557	27.7713	5979.27	17	1000000000
122.438	136.356	5980.04	17	1000000064
244.032	187.38	5993.5	17	1000000003
341.899	146.478	5968.18	17	1000000004
384.328	229.766	5968.62	17	1000000006
351.846	178.985	5976.46	17	1000000005
290.679	178.186	5980.02	17	1000000081
296.057	78.4834	5981.35	17	1000000010
326.698	185.369	5981.22	17	1000000007
314.411	187.458	5980.72	17	1000000071
506.94	192.467	5982.2	17	1000000009
289.305	146.4	5985.7	17	1000000008
351.816	88.7199	5988.46	17	1000000058
382.595	207.224	5990.57	17	1000000045
313.291	197.554	5991.99	17	1000000084
269.934	196.169	5996.58	17	1000000062
265.838	135.489	6000.07	17	1000000060
99.8621	319.239	5970.78	17	1000000012
11.0935	299.807	5972.41	17	1000000011
202.947	310.654	5973.69	17	1000000061
95.0466	303.016	5975.7	17	1000000069
51.0977	314.463	5975.29	17	1000000018
124.749	325.222	5974.74	17	1000000014
240.147	335.33	5975.14	17	1000000015
51.9187	341.471	5975.28	17	1000000013
35.2031	336.155	5977.65	17	1000000031
195.675	270.465	5979.66	17	1000000019
216.514	318.852	5979.78	17	1000000017
30.1375	347.921	5978.87	17	1000000085
-5.96046e-08	305.17	5980.93	17	1000000068
32.0945	316.668	5981.67	17	1000000059
204.463	373.12	5981.21	17	1000000020
139.258	492.123	5982.36	17	1000000023
213.765	335.928	5985.94	17	1000000027
240.17	382.838	5985.62	17	1000000029
56.3657	468.416	5985.04	17	1000000022
96.5923	279.134	5987.28	17	1000000016
72.9154	335.379	5987.91	17	1000000028
48.7646	411.672	5990.67	17	1000000072
159.556	440.457	5990.06	17	1000000021
86.2244	342.357	5993.46	17	1000000026
144.154	429.233	5993.82	17	1000000030
74.3163	288.444	5996.67	17	1000000054
101.705	392.536	5995.95	17	1000000050
198.918	436.255	5997.27	17	1000000088
83.7727	436.914	5996.97	17	1000000025
53.3996	503.559	5995.94	17	1000000080
4.11794	441.433	5999.68	17	1000000087
17.3896	460.874	5999.36	17	1000000024
307.542	309.825	5966	17	1000000032
366.439	415.302	5970.64	17	1000000034
306.748	353.547	5974.15	17	1000000035
487.333	341.592	5978.77	17	1000000033
260.931	486.533	5979.3	17	1000000037
372.873	458.602	5980.94	17	1000000036
451.576	506.94	5982.46	17	1000000082
439.066	420.224	5982.89	17	1000000038
300.289	474.267	5984.33	17	1000000039
362.842	415.555	5986.27	17	1000000041
407.879	469.159	5990.71	17	1000000063
348.736	262.888	5991.36	17	1000000042
393.168	443.384	5992.1	17	1000000056
263.694	256.237	5995.66	17	1000000049
232.136	138.714	6001.72	17	1000000065
241.814	127.58	6004.58	17	1000000066
210.344	94.2993	6009.79	17	1000000044
299.508	80.5259	6001.18	17	1000000046
391.159	119.749	6002.65	17	1000000076
424.776	154.489	6002.35	17	1000000089
389.626	81.4268	6014.92	17	1000000047
442.234	148.419	6020.81	17	1000000074
331.596	129.048	6023.2	17	1000000090
40.4734	473.112	6001.5	17	1000000051
199.523	342.134	6003.06	17	1000000052
89.2694	413.55	6002.97	17	1000000053
98.3283	497.365	6002.75	17	1000000079
16.0032	437.191	6006.3	17	1000000048
241.794	387.211	6008.57	17	1000000075
18.5068	302.764	6009.82	17	1000000055
23.7003	370.034	6014.08	17	1000000067
47.179	475.63	6019.63	17	1000000086
287.407	270.827	6003.56	17	1000000043
353.688	277.53	6004.06	17	1000000040
414.347	323.784	6002.61	17	1000000057
191.402	196.376	5966	18	1000000002
93.163	103.916	5970.72	18	1000000001
103.783	41.2147	5975.25	18	1000000070
140.05	26.6088	5977.53	18	1000000000
53.1885	213.179	5976.34	18	1000000083
122.342	134.98	5980.14	18	1000000064
206.915	96.1562	5990.81	18	1000000073
244.32	185.203	5994.38	18	1000000003
342.075	143.968	5968.67	18	1000000004
386.019	230.088	5969.69	18	1000000006
351.72	178.81	5976.69	18	1000000005
313.288	185.458	5978.19	18	1000000071
297.052	78.3759	5981.25	18	1000000010
289.868	178.402	5980.6	18	1000000081
287.726	145.435	5984.27	18	1000000008
326.178	185.09	5983.28	18	1000000007
506.94	191.694	5982.93	18	1000000009
352.319	85.6286	5987.85	18	1000000058
313.483	196.398	5990.01	18	1000000084
383.781	206.997	5990.25	18	1000000045
409.578	127.404	5997.39	18	1000000091
269.844	193.922	5997.79	18	1000000062
263.172	252.92	5996.57	18	1000000049
318.545	120.616	5999.12	18	1000000078
426.261	150.78	5998.77	18	1000000089
97.0746	318.117	5971.13	18	1000000012
7.74266	301.676	5971.94	18	1000000011
92.3842	303.008	5973.54	18	1000000069
202.03	311.111	5972.33	18	1000000061
125.093	323.345	5973.5	18	1000000014
240.537	334.944	5974.46	18	1000000015
53.584	341.088	5975.44	18	1000000013
51.7814	313.411	5975.96	18	1000000018
217.22	317.854	5977.68	18	1000000017
30.8132	346.911	5976.69	18	1000000085
35.1705	333.099	5978.28	18	1000000031
204.91	370.064	5979.61	18	1000000020
194.069	269.491	5981.08	18	1000000019
-5.96046e-08	303.173	5981.16	18	1000000068
31.9321	311.776	5980.99	18	1000000059
139.709	492.135	5981.01	18	1000000023
95.754	279.225	5985.9	18	1000000016
214.62	334.974	5985.31	18	1000000027
239.569	381.226	5985.4	18	1000000029
55.7959	466.122	5985	18	1000000022
72.1273	333.623	5988.39	18	1000000028
87.2294	340.378	5990.65	18	1000000026
47.2835	410.722	5990.29	18	1000000072
160.667	439.719	5990.1	18	1000000021
74.4603	286.124	5995.01	18	1000000054
141.589	427.827	5995.52	18	1000000030
105.262	393.574	5996.99	18	1000000050
51.7528	502.818	5996.74	18	1000000080
89.6693	413.673	5999.53	18	1000000053
307.748	307.012	5966	18	1000000032
366.433	414.515	5969.61	18	1000000034
306.098	351.902	5973.63	18	1000000035
486.506	340.484	5977.44	18	1000000033
371.809	458.538	5979.5	18	1000000036
261.648	484.952	5978.35	18	1000000037
441.708	416.174	5981.65	18	1000000038
451.529	503.718	5981.88	18	1000000082
301.335	473.005	5984.29	18	1000000039
363.675	413.845	5986.33	18	1000000041
395.744	440.97	5990.72	18	1000000056
410.013	467.423	5991	18	1000000063
353.637	260.597	5992.3	18	1000000042
234.14	139.28	6000.83	18	1000000065
240.968	126.333	6002.97	18	1000000066
170.354	100.046	6005.39	18	1000000077
211.829	92.3985	6007.48	18	1000000044
300.871	79.5102	6000.33	18	1000000046
266.004	134.953	6001.43	18	1000000060
294.098	230.214	6001.1	18	1000000092
391.621	118.651	6002.51	18	1000000076
392.973	80.2277	6017.67	18	1000000047
332.447	124.317	6018.2	18	1000000090
447.682	145.73	6019.38	18	1000000074
84.9278	435.42	6000.51	18	1000000025
5.05614	441.28	6001.71	18	1000000087
18.69	459.036	6000.32	18	1000000024
39.4529	472.805	6001.18	18	1000000051
101.804	495.928	6001.86	18	1000000079
198.302	340.158	6003.15	18	1000000052
15.7521	435.955	6006.16	18	1000000048
17.695	301.714	6009.41	18	1000000055
239.909	386.036	6010.31	18	1000000075
24.402	369.125	6014.54	18	1000000067
48.026	474.868	6019.95	18	1000000086
287.225	269.859	6004.26	18	1000000043
415.662	322.182	6002.58	18	1000000057
354.031	275.381	6006.02	18	1000000040
191.01	194.887	5966	19	1000000002
93.1342	102.781	5969.54	19	1000000001
141.227	23.3823	5976.29	19	1000000000
52.5061	209.657	5976.12	19	1000000083
104.85	39.8708	5979.06	19	1000000070
123.27	132.69	5982.11	19	1000000064
206.817	92.7517	5989.52	19	1000000073
139.058	117.006	5995.09	19	1000000093
243.858	183.607	5995.18	19	1000000003
240.39	123.322	5999.95	19	1000000066
340.691	143.971	5969.4	19	1000000004
385.764	229.408	5969.48	19	1000000006
352.507	178.932	5978.87	19	1000000005
314.168	183.653	5979.83	19	1000000071
297.916	76.445	5980.9	19	1000000010
289.059	177.011	5982.01	19	1000000081
326.491	183.517	5982.27	19	1000000007
286.574	143.697	5983.52	19	1000000008
506.94	191.776	5983.85	19	1000000009
355.95	83.8825	5988.54	19	1000000058
313.909	194.838	5990.48	19	1000000084
382.601	204.934	5990.6	19	1000000045
317.037	122.302	5995.95	19	1000000078
264.599	252.138	5996.44	19	1000000049
301.382	78.0883	5999.21	19	1000000046
424.422	151.502	5998.5	19	1000000089
270.029	192.297	5998.91	19	1000000062
202.538	311.778	5971.34	19	1000000061
97.8422	316.461	5970.35	19	1000000012
7.89025	301.152	5971.95	19	1000000011
92.6831	302.368	5972.84	19	1000000069
124.188	321.644	5972.62	19	1000000014
34.1219	329.061	5975.08	19	1000000031
240.16	334.843	5975.07	19	1000000015
53.5702	337.584	5975.53	19	1000000013
51.9216	309.638	5977.13	19	1000000018
217.396	315.264	5977.2	19	1000000017
30.5894	344.916	5976.2	19	1000000085
195.147	269.589	5979.96	19	1000000019
204.918	369.714	5981.1	19	1000000020
140.998	490.178	5981.05	19	1000000023
-5.96046e-08	303.165	5982.58	19	1000000068
31.2138	309.036	5983.2	19	1000000059
214.529	333.042	5983.79	19	1000000027
94.5184	276.398	5985.54	19	1000000016
239.373	381.314	5986.29	19	1000000029
56.307	466.616	5985.33	19	1000000022
72.4969	332.338	5987.92	19	1000000028
87.6388	338.898	5990.42	19	1000000026
159.677	439.004	5990.07	19	1000000021
47.1004	408.827	5992.82	19	1000000072
72.9049	282.676	5994.36	19	1000000054
140.585	427.083	5996.26	19	1000000030
52.7658	500.49	5997.13	19	1000000080
107.339	392.098	5998.52	19	1000000050
89.0767	411.624	5999.11	19	1000000053
84.2345	431.987	5999.23	19	1000000025
40.2136	469.962	5999.56	19	1000000051
306.89	306.394	5966	19	1000000032
364.152	413.166	5971.09	19	1000000034
302.91	351.72	5973.25	19	1000000035
485.202	339.911	5977.16	19	1000000033
260.548	483.249	5977.64	19	1000000037
442.357	413.838	5980.88	19	1000000038
370.61	457.122	5980.32	19	1000000036
451.718	501.257	5982.19	19	1000000082
301.444	472.093	5983.21	19	1000000039
363.29	412.823	5987.62	19	1000000041
356.422	259.262	5989.86	19	1000000042
396.64	440.007	5989.95	19	1000000056
408.398	464.776	5990.41	19	1000000063
427.058	316.397	5999.58	19	1000000094
232.728	137.561	6001.02	19	1000000065
169.516	97.8528	6005.58	19	1000000077
211.813	89.2082	6010.07	19	1000000044
263.699	132.304	6001.02	19	1000000060
393.265	117.343	6003.24	19	1000000076
393.721	78.6981	6017.57	19	1000000047
448.959	141.399	6023.2	19	1000000074
197.078	341.752	6002.18	19	1000000052
5.08552	441.542	6001.64	19	1000000087
102.744	495.268	6001.33	19	1000000079
17.7565	457.101	6003.07	19	1000000024
15.2008	434.948	6007.53	19	1000000048
19.7302	299.717	6010.29	19	1000000055
238.688	384.76	6009.92	19	1000000075
25.6903	367.244	6012.77	19	1000000067
47.2653	471.588	6018.55	19	1000000086
287.013	266.32	6002.88	19	1000000043
416.151	320.216	6003.29	19	1000000057
355.581	272.846	6006.96	19	1000000040
190.185	194.118	5966	20	1000000002
92.618	101.065	5968.25	20	1000000001
51.6515	206.847	5977.66	20	1000000083
140.257	21.5288	5978.43	20	1000000000
106.034	37.4228	5980.59	20	1000000070
123.871	134.383	5982.4	20	1000000064
208.136	90.6202	5989.67	20	1000000073
140.692	115.223	5991.95	20	1000000093
245.654	181.281	5996.87	20	1000000003
341.115	141.034	5969.42	20	1000000004
387.446	228.472	5970.29	20	1000000006
353.814	177.254	5978.09	20	1000000005
314.707	180.749	5979.49	20	1000000071
327.827	181.923	5978.7	20	1000000007
297.989	75.3862	5981.33	20	1000000010
291.492	175.46	5981.53	20	1000000081
286.624	143.091	5982.77	20	1000000008
506.94	189.578	5985.72	20	1000000009
357.168	82.0803	5990.6	20	1000000058
314.423	192.171	5990.43	20	1000000084
382.722	204.716	5989.46	20	1000000045
315.274	121.54	5994.92	20	1000000078
412.633	123.636	5994.74	20	1000000091
301.654	78.0759	5996.63	20	1000000046
424.257	153.13	5997.58	20	1000000089
264.34	252.024	5996.97	20	1000000049
270.104	192.986	5998.39	20	1000000062
293.976	224.228	5999.08	20	1000000092
97.9853	315.211	5971.11	20	1000000012
5.51761	302.082	5972.11	20	1000000011
91.5464	302.287	5972.69	20	1000000069
202.115	308.986	5972.8	20	1000000061
221.728	313.694	5975.54	20	1000000017
123.52	319.985	5973.78	20	1000000014
34.7352	327.022	5975.3	20	1000000031
241.581	334.315	5975.62	20	1000000015
52.1786	308.996	5976.19	20	1000000018
53.3021	335.435	5976.35	20	1000000013
28.9669	342.889	5976.84	20	1000000085
204.786	366.436	5978.68	20	1000000020
195.187	268.455	5981.28	20	1000000019
214.023	331.45	5981.91	20	1000000027
142.32	490.223	5980.77	20	1000000023
-5.96046e-08	301.184	5982.61	20	1000000068
30.608	305.986	5982.53	20	1000000059
92.4959	274.158	5986	20	1000000016
240.461	379.34	5986.8	20	1000000029
56.8128	466.339	5986.79	20	1000000022
73.5018	330.127	5987.83	20	1000000028
89.2378	337.496	5990.27	20	1000000026
160.705	436.751	5990.04	20	1000000021
72.8672	281.742	5995.05	20	1000000054
48.2387	407.287	5994.49	20	1000000072
142.575	426.284	5996.96	20	1000000030
196.883	438.181	5997.6	20	1000000088
52.6407	499.864	5996.74	20	1000000080
108.806	389.961	5998.12	20	1000000050
90.165	411.799	5998.26	20	1000000053
42.3222	467.931	5999.98	20	1000000051
105.491	494.575	5999.97	20	1000000079
307.869	305.058	5966	20	1000000032
364.046	411.537	5970.72	20	1000000034
303.821	350.135	5971.67	20	1000000035
485.634	339.138	5974.73	20	1000000033
444.47	411.73	5979.47	20	1000000038
368.342	456.267	5980.87	20	1000000036
299.665	471.926	5982.34	20	1000000039
451.531	499.299	5981.94	20	1000000082
364.434	412.411	5986.88	20	1000000041
396.812	437.771	5988.96	20	1000000056
408.073	462.834	5988.19	20	1000000063
358.974	260.843	5990.02	20	1000000042
240.852	122.72	6000.21	20	1000000066
234.954	136.958	6000.29	20	1000000065
169.509	97.0276	6004.85	20	1000000077
211.196	86.0792	6009.73	20	1000000044
393.495	118.586	6001.52	20	1000000076
263.084	131.929	6000.53	20	1000000060
393.173	76.9137	6017.51	20	1000000047
330.779	118.954	6016.72	20	1000000090
451.618	138.045	6023.2	20	1000000074
86.307	427.923	6001.88	20	1000000025
6.64241	439.705	6002.25	20	1000000087
195.967	338.637	6002.62	20	1000000052
18.0269	455.594	6004.21	20	1000000024
21.7034	296.028	6008.59	20	1000000055
238.734	383.45	6008.88	20	1000000075
14.4864	431.108	6007.18	20	1000000048
26.744	364.255	6011.8	20	1000000067
46.7487	470.03	6020.42	20	1000000086
288.735	264.5	6002.56	20	1000000043
431.684	316.465	6003.42	20	1000000094
311.553	456.913	6004.05	20	1000000095
418.791	321.415	6004.63	20	1000000057
354.609	272.094	6010.45	20	1000000040
93.0618	100.193	5966	21	1000000001
190.132	194.261	5966	21	1000000002
140.298	19.2339	5977.4	21	1000000000
52.5474	204.814	5977.04	21	1000000083
105.016	36.5469	5978.57	21	1000000070
207.499	89.1852	5990.45	21	1000000073
140.635	112.915	5991.69	21	1000000093
239.727	121.724	5999.8	21	1000000066
234.832	136.802	5999.8	21	1000000065
247	178.711	5998.95	21	1000000003
389.414	227.531	5968.94	21	1000000006
342.509	139.647	5969.56	21	1000000004
353.734	178.039	5976.77	21	1000000005
329.032	180.764	5978.32	21	1000000007
286.496	141.593	5982.39	21	1000000008
292.815	172.894	5980.85	21	1000000081
317.397	178.952	5981.36	21	1000000071
297.41	73.4144	5983.35	21	1000000010
506.94	189.734	5985.51	21	1000000009
383.02	204.303	5988.23	21	1000000045
314.619	188.699	5989.27	21	1000000084
414.078	121.882	5992.22	21	1000000091
356.661	82.8952	5994.41	21	1000000058
314.241	120.314	5993.86	21	1000000078
302.379	79.8279	5996.23	21	1000000046
422.337	153.5	5997.27	21	1000000089
265.572	250.658	5996.45	21	1000000049
395.897	116.632	5999.84	21	1000000076
262.306	131.332	5998.09	21	1000000060
269.142	191.011	5998.42	21	1000000062
295.434	219.886	5998.23	21	1000000092
91.2412	300.844	5971.42	21	1000000069
204.071	308.53	5971.3	21	1000000061
99.6299	312.024	5970.08	21	1000000012
4.59532	302.127	5971.63	21	1000000011
222.171	310.855	5973.41	21	1000000017
124.047	319.111	5975.04	21	1000000014
36.5201	325.345	5974.65	21	1000000031
241.285	334.133	5975	21	1000000015
31.0092	341.711	5975.04	21	1000000085
52.8287	308.081	5976.39	21	1000000018
53.9616	333.177	5977.74	21	1000000013
205.903	365.791	5977.75	21	1000000020
1.51621	299.764	5981.98	21	1000000068
213.267	329.763	5980.94	21	1000000027
143.129	490.479	5980.33	21	1000000023
194.839	266.254	5982.92	21	1000000019
30.6492	302.916	5983.9	21	1000000059
90.1879	272.06	5986.29	21	1000000016
73.7903	329.776	5986.7	21	1000000028
240.833	379.251	5986.68	21	1000000029
-5.96046e-08	273.749	5987.78	21	1000000096
56.4025	464.715	5987.3	21	1000000022
89.7613	335.81	5990.21	21	1000000026
159.171	436.702	5990.17	21	1000000021
71.9231	280.128	5994.76	21	1000000054
50.6397	406.012	5994.85	21	1000000072
89.8961	409.187	5997.65	21	1000000053
111.922	387.014	5998.8	21	1000000050
140.788	425.759	5998.01	21	1000000030
54.1657	498.814	5997.94	21	1000000080
309.977	302.637	5967.91	21	1000000032
364.271	411.068	5971.18	21	1000000034
486.867	336.496	5973.12	21	1000000033
303.994	348.307	5971.73	21	1000000035
263.318	483.27	5978.88	21	1000000037
443.21	410.133	5980.64	21	1000000038
368.212	455.188	5981.63	21	1000000036
298.349	469.441	5982.15	21	1000000039
453.755	495.292	5983.06	21	1000000082
367.499	410.266	5985.74	21	1000000041
409.449	460.498	5988.28	21	1000000063
363.435	260.121	5990.9	21	1000000042
398.857	433.286	5992.34	21	1000000056
169.147	96.3447	6003.53	21	1000000077
210.797	83.6645	6010.25	21	1000000044
330.277	118.172	6016.24	21	1000000090
395.728	75.699	6018.69	21	1000000047
454.053	136.589	6023.2	21	1000000074
195.561	337.29	6001.78	21	1000000052
86.6048	423.725	6002.26	21	1000000025
44.6727	465.818	6000.67	21	1000000051
108.389	493.27	6001.4	21	1000000079
8.21565	439.099	6003.31	21	1000000087
16.6259	454.662	6005.59	21	1000000024
22.4109	295.01	6006.71	21	1000000055
16.5319	428.961	6007.77	21	1000000048
238.362	381.66	6009.21	21	1000000075
28.8913	361.678	6011.53	21	1000000067
47.9931	467.339	6018.94	21	1000000086
289.854	263.089	6000.74	21	1000000043
431.846	314.559	6003.14	21	1000000094
316.854	455.628	6003.34	21	1000000095
420.029	322.608	6004.78	21	1000000057
354.731	269.936	6014.35	21	1000000040
94.1286	100.557	5966	22	1000000001
188.424	191.98	5966	22	1000000002
140.043	19.6707	5977.73	22	1000000000
53.9801	203.382	5976.9	22	1000000083
106.95	33.6855	5979.81	22	1000000070
124.891	125.984	5979.85	22	1000000064
208.561	87.0841	5988.36	22	1000000073
219.786	221.705	5989.51	22	1000000097
143.103	112.972	5992.76	22	1000000093
239.815	121.247	5998.76	22	1000000066
246.313	176.316	5999.31	22	1000000003
342.38	139.035	5968.67	22	1000000004
389.669	226.906	5970.37	22	1000000006
354.889	177.937	5975.49	22	1000000005
330.475	180.009	5977.47	22	1000000007
286.667	141.503	5981.7	22	1000000008
293.608	173.754	5980.44	22	1000000081
318.525	176.693	5981.41	22	1000000071
506.94	188.935	5984.06	22	1000000009
299.821	71.7057	5984.73	22	1000000010
316.067	187.338	5987.56	22	1000000084
382.052	201.272	5988.01	22	1000000045
416.676	121.259	5989.23	22	1000000091
315.563	118.85	5994.49	22	1000000078
261.858	129.071	5995.41	22	1000000060
304.786	79.366	5996.01	22	1000000046
360.548	80.1562	5996.48	22	1000000058
269.797	190.474	5997.46	22	1000000062
266.882	248.685	5997.15	22	1000000049
422.495	151.961	5999.31	22	1000000089
297.355	216.623	5999.08	22	1000000092
91.2952	299.532	5973.16	22	1000000069
1.25883	301.425	5972.83	22	1000000011
201.822	304.285	5972.04	22	1000000061
224.105	308.66	5972.96	22	1000000017
123.204	317.779	5974.61	22	1000000014
37.5854	322.885	5975.52	22	1000000031
241.512	333.716	5974.46	22	1000000015
33.1682	339.586	5975.59	22	1000000085
53.5816	306.375	5977.75	22	1000000018
53.725	329.001	5977.34	22	1000000013
4.39298	297.388	5981.6	22	1000000068
211.707	328.568	5980.89	22	1000000027
204.751	367.125	5980.37	22	1000000020
144.408	489.973	5981.35	22	1000000023
194.3	265.931	5983.25	22	1000000019
29.8754	299.964	5983.2	22	1000000059
91.0329	268.434	5986.46	22	1000000016
-5.96046e-08	275.118	5986.32	22	1000000096
239.127	379.861	5986.83	22	1000000029
74.9364	328.054	5988.04	22	1000000028
57.3623	464.702	5987.34	22	1000000022
89.5677	334.52	5990.56	22	1000000026
158.188	435.126	5990.62	22	1000000021
72.3224	278.562	5995.42	22	1000000054
53.9261	404.738	5995.57	22	1000000072
91.5102	410.633	5996.98	22	1000000053
53.2812	498.98	5996.71	22	1000000080
117.03	385.143	5998.74	22	1000000050
141.353	424.375	5998.32	22	1000000030
310.341	302.371	5970.72	22	1000000032
363.695	408.996	5970.87	22	1000000034
487.226	334.203	5972.45	22	1000000033
302.66	347.749	5972.82	22	1000000035
263.967	481.836	5979.1	22	1000000037
445.69	407.972	5980.96	22	1000000038
369.421	410.261	5984.42	22	1000000041
371.066	456.237	5983	22	1000000036
295.641	469.183	5982.59	22	1000000039
456.209	492.685	5983.41	22	1000000082
410.499	455.49	5988.11	22	1000000063
367.699	258.562	5989.92	22	1000000042
401.079	432.011	5992.37	22	1000000056
292.137	261.123	5999.23	22	1000000043
431.304	311.926	5998.09	22	1000000098
235.345	137.15	6000.85	22	1000000065
167.879	95.0807	6003.93	22	1000000077
209.465	82.2748	6010.08	22	1000000044
396.35	115.785	6001.47	22	1000000076
396.936	73.1539	6014.77	22	1000000047
333.352	115.278	6015.79	22	1000000090
457.505	134.479	6021.99	22	1000000074
85.8174	421.705	6001.16	22	1000000025
47.5306	463.866	6001.09	22	1000000051
108.69	492.913	6000.63	22	1000000079
194.243	336.29	6002.35	22	1000000052
8.88189	439.047	6003.29	22	1000000087
23.1391	293.418	6008.07	22	1000000055
237.249	383.49	6007.79	22	1000000075
18.0426	426.445	6008.81	22	1000000048
15.4851	453.995	6006.74	22	1000000024
29.7457	359.282	6009.18	22	1000000067
86.515	470.435	6015.63	22	1000000099
50.7907	466.882	6018.56	22	1000000086
419.971	320.098	6004.09	22	1000000057
321.259	453.466	6002.8	22	1000000095
355.2	268.706	6016.04	22	1000000040
94.3659	98.9805	5966	23	1000000001
189.575	191.178	5966	23	1000000002
52.6004	200.914	5977.8	23	1000000083
141.386	17.3837	5979.06	23	1000000000
127.091	123.271	5980.06	23	1000000064
107.042	32.132	5981.34	23	1000000070
95.0257	55.15	5987.94	23	1000000100
209.201	84.618	5987.75	23	1000000073
220.86	220.582	5988.75	23	1000000097
143.053	110.35	5991.01	23	1000000093
240.456	121.137	5997.14	23	1000000066
236.843	136.719	5999.13	23	1000000065
246.838	173.859	5999.43	23	1000000003
343.108	137.567	5970.47	23	1000000004
389.97	226.045	5970.36	23	1000000006
332.384	177.124	5976.54	23	1000000007
353.486	177.198	5976.37	23	1000000005
289.03	141.147	5981.29	23	1000000008
296.309	173.67	5980.85	23	1000000081
319.917	175.424	5981.9	23	1000000071
300.312	70.9175	5983.72	23	1000000010
506.94	188.097	5985.68	23	1000000009
317.015	185.101	5988.6	23	1000000084
418.176	120.934	5990.16	23	1000000091
381.468	198.721	5989.27	23	1000000045
359.994	80.1784	5995.5	23	1000000058
262.663	126.447	5995.02	23	1000000060
304.922	78.3271	5996.14	23	1000000046
314.881	116.83	5996.68	23	1000000078
271.594	191.532	5996.38	23	1000000062
421.317	152.981	5998.5	23	1000000089
269.987	232.285	5998.33	23	1000000101
269.28	249.576	5998.47	23	1000000049
92.2118	297.955	5972.95	23	1000000069
1.9275	300.443	5972.76	23	1000000011
202.04	302.14	5972.64	23	1000000061
224.791	305.579	5972.39	23	1000000017
101.953	310.6	5972.01	23	1000000012
124.968	316.014	5973.35	23	1000000014
241.878	332.912	5972.34	23	1000000015
39.029	322.269	5975.17	23	1000000031
54.5377	327.968	5977.8	23	1000000013
35.5733	338.483	5976.51	23	1000000085
54.7277	305.487	5978.85	23	1000000018
210.886	328.179	5979.94	23	1000000027
7.51833	297.012	5981.91	23	1000000068
205.543	366.045	5981.32	23	1000000020
144.789	490.725	5981.35	23	1000000023
32.6259	298.208	5984.26	23	1000000059
194.095	264.781	5985.26	23	1000000019
87.685	265.567	5986.36	23	1000000016
238.167	382.031	5986.75	23	1000000029
-5.96046e-08	268.872	5987.52	23	1000000096
76.1592	326.418	5988.4	23	1000000028
56.7971	462.659	5988.76	23	1000000022
89.4644	334.186	5990.81	23	1000000026
158.725	434.983	5991.95	23	1000000021
72.9628	277.703	5997.08	23	1000000054
57.7666	405.346	5996.65	23	1000000072
93.1775	411.082	5997.32	23	1000000053
142.497	422.399	5997.09	23	1000000030
196.275	437.691	5996.66	23	1000000088
53.0312	499.444	5996.26	23	1000000080
119.552	384.833	5999.28	23	1000000050
110.392	491.482	5999.6	23	1000000079
364.196	406.766	5969.13	23	1000000034
311.781	301.591	5970.14	23	1000000032
487.378	333.003	5970.43	23	1000000033
302.521	347.225	5974.49	23	1000000035
263.265	481.039	5979.24	23	1000000037
445.469	406.449	5980.77	23	1000000038
370.864	409.751	5983.89	23	1000000041
375.245	453.623	5982.91	23	1000000036
295.335	469.177	5983.13	23	1000000039
461.313	487.785	5982.72	23	1000000082
292.913	489.464	5983.33	23	1000000102
411.137	454.25	5986.6	23	1000000063
369.757	257.792	5988.61	23	1000000042
402.831	428.622	5992.28	23	1000000056
433.905	308.295	5996.36	23	1000000098
292.997	260.442	5999.25	23	1000000043
168.281	93.7137	6003.53	23	1000000077
210.764	83.6706	6012.14	23	1000000044
396.693	115.854	6000.6	23	1000000076
298.713	215.298	6000.89	23	1000000092
398.755	72.2598	6013.66	23	1000000047
333.882	113.464	6015.42	23	1000000090
460.862	129.759	6021.81	23	1000000074
86.0539	419.679	6002.04	23	1000000025
193.108	335.778	6002.92	23	1000000052
8.78005	438.205	6003.64	23	1000000087
49.4194	463.371	6003.36	23	1000000051
11.3821	452.409	6006.21	23	1000000024
25.7466	289.522	6007.1	23	1000000055
30.0589	358.064	6007.85	23	1000000067
237.337	381.102	6009.84	23	1000000075
19.2602	423.066	6010.38	23	1000000048
88.5235	466.914	6014.35	23	1000000099
36.2961	407.496	6016.07	23	1000000103
49.8428	464.589	6019.23	23	1000000086
324.211	454.35	6000.64	23	1000000095
420.85	317.785	6004.83	23	1000000057
255.213	320.636	6009.83	23	1000000104
356.034	266.718	6016.29	23	1000000040
190.777	190.605	5966	24	1000000002
94.854	96.3701	5967.57	24	1000000001
141.303	14.379	5977.84	24	1000000000
53.4438	200.639	5976.87	24	1000000083
127.118	120.338	5978.57	24	1000000064
97.1802	53.2006	5984.82	24	1000000100
211.282	82.3059	5985.9	24	1000000073
144.334	108.702	5989.78	24	1000000093
220.619	218.65	5989.65	24	1000000097
218.616	90.8736	5991.69	24	1000000105
240.739	119.691	5997.02	24	1000000066
248.8	172.063	5999.44	24	1000000003
65.8705	212.528	6000.06	24	1000000106
345.301	136.628	5971.04	24	1000000004
333.818	176.155	5975.73	24	1000000007
355.676	176.509	5978.08	24	1000000005
289.529	141.934	5980.9	24	1000000008
297.856	174.279	5981.27	24	1000000081
300.564	71.2705	5983.35	24	1000000010
323.714	176.256	5983.04	24	1000000071
506.94	189.366	5984.46	24	1000000009
418.894	120.116	5990.17	24	1000000091
321.647	182.534	5989.81	24	1000000084
264.516	124.8	5992.89	24	1000000060
380.895	195.788	5993.26	24	1000000045
306.021	77.09	5993.95	24	1000000046
360.599	81.5462	5995.43	24	1000000058
317.887	116.676	5996.48	24	1000000078
273.644	192.224	5996.65	24	1000000062
271.887	248.42	5996.38	24	1000000049
271.155	231.356	5998.68	24	1000000101
248.893	378.506	5970.98	24	1000000107
226.346	303.378	5972.82	24	1000000017
99.9733	308.925	5972.14	24	1000000012
241.129	332.548	5971.95	24	1000000015
91.6724	297.64	5974.62	24	1000000069
199.594	298.817	5975.38	24	1000000061
3.40782	300.535	5974.31	24	1000000011
125.115	315.39	5974.97	24	1000000014
40.491	320.96	5975.61	24	1000000031
36.0498	335.208	5975.47	24	1000000085
55.3901	327.65	5977.08	24	1000000013
210.623	327.943	5979.77	24	1000000027
8.1222	296.666	5981.94	24	1000000068
56.012	303.236	5980.37	24	1000000018
208.261	364.498	5980.67	24	1000000020
145.951	489.212	5982.23	24	1000000023
85.6989	262.281	5983.74	24	1000000016
194.269	263.665	5986.12	24	1000000019
-5.96046e-08	267.749	5985.82	24	1000000096
32.2887	294.451	5985.13	24	1000000059
237.741	380.017	5986.45	24	1000000029
78.0031	326.068	5988.35	24	1000000028
56.4193	461.992	5988.67	24	1000000022
89.8797	332.103	5989.97	24	1000000026
156.644	433.203	5992.21	24	1000000021
51.1531	499.006	5994.89	24	1000000080
62.255	405.222	5996.78	24	1000000072
73.6187	275.809	5998.72	24	1000000054
120.107	384.11	5999.87	24	1000000050
94.1842	412.509	5998.62	24	1000000053
142.845	421.838	5998.2	24	1000000030
195.032	435.808	5998.27	24	1000000088
111.683	486.887	5999.65	24	1000000079
117.295	506.94	5998.49	24	1000000108
312.586	301.553	5970.75	24	1000000032
487.589	330.637	5970.52	24	1000000033
364.736	404.971	5970.76	24	1000000034
303.336	346.638	5974.33	24	1000000035
264.86	480.562	5979.6	24	1000000037
445.623	405.12	5980.73	24	1000000038
373.399	452.068	5981.92	24	1000000036
371.848	412.355	5983.49	24	1000000041
295.642	467.36	5983.14	24	1000000039
461.961	484.989	5984.39	24	1000000082
293.068	489.772	5983.85	24	1000000102
409.825	453.317	5988.84	24	1000000063
373.592	254.998	5991.35	24	1000000042
435.514	305.881	5993.97	24	1000000098
403.246	424.97	5994.34	24	1000000056
295.366	259.937	5998.42	24	1000000043
325.077	451.482	5999.66	24	1000000095
169.134	92.8632	6001.86	24	1000000077
235.415	138.307	6000.71	24	1000000065
211.767	83.1371	6012.17	24	1000000044
417.815	156.046	6000.69	24	1000000089
396.28	118.89	6002.9	24	1000000076
301.479	214.495	6002.77	24	1000000092
396.404	156.107	6009.47	24	1000000109
399.819	70.8953	6014.89	24	1000000047
335.71	113.485	6016.81	24	1000000090
463.944	128.02	6019.48	24	1000000074
65.6466	349.384	6001.67	24	1000000110
192.058	335.664	6002.74	24	1000000052
84.0698	418.655	6003.27	24	1000000025
9.9657	435.477	6002.69	24	1000000087
49.0165	461.51	6003.98	24	1000000051
25.5025	288.38	6006.61	24	1000000055
86.2497	402.006	6005.08	24	1000000111
10.6117	451.275	6005.67	24	1000000024
148.69	345.702	6007.82	24	1000000112
30.209	357.19	6009.68	24	1000000067
237.131	379.465	6009.81	24	1000000075
19.455	419.018	6010.5	24	1000000048
34.6919	404.882	6012.58	24	1000000103
87.8028	464.503	6012.75	24	1000000099
49.7333	463.327	6023.2	24	1000000086
430.22	313.983	6000.58	24	1000000094
420.959	314.861	6006.37	24	1000000057
255.979	319.035	6009.9	24	1000000104
357.664	264.511	6018.25	24	1000000040
191.237	189.21	5966	25	1000000002
94.7875	94.5873	5968.71	25	1000000001
142.987	14.0604	5977.93	25	1000000000
53.2811	199.16	5977.44	25	1000000083
127.759	117.255	5979.18	25	1000000064
106.271	30.2372	5981.18	25	1000000070
99.5444	52.4038	5982.59	25	1000000100
212.571	81.2404	5986.66	25	1000000073
145.152	106.626	5988.78	25	1000000093
218.953	216.8	5988.45	25	1000000097
218.727	90.9423	5991.88	25	1000000105
67.498	210.969	5996.55	25	1000000106
240.589	118.456	5998.14	25	1000000066
238.137	136.807	6000.02	25	1000000065
346.11	137.404	5971.37	25	1000000004
335.794	174.823	5976.86	25	1000000007
288.956	140.834	5979.83	25	1000000008
300.213	173.729	5980.3	25	1000000081
300.213	71.7387	5982.19	25	1000000010
353.967	173.759	5980.65	25	1000000005
324.288	176.261	5982.41	25	1000000071
506.94	188.059	5984.59	25	1000000009
419.648	121.066	5988.89	25	1000000091
323.072	181.43	5990.19	25	1000000084
306.215	75.4983	5993.17	25	1000000046
358.779	83.6964	5992.55	25	1000000058
265.276	124.565	5993.05	25	1000000060
380.359	193.533	5995.37	25	1000000045
273.214	248.354	5994.63	25	1000000049
273.514	192.832	5997.52	25	1000000062
318.459	114.232	5998.84	25	1000000078
418.847	154.783	5999.63	25	1000000089
270.505	231.807	5998.81	25	1000000101
250.849	377.738	5971.23	25	1000000107
226.863	301.447	5972.04	25	1000000017
99.9725	306.759	5971.84	25	1000000012
126.258	314.836	5973.02	25	1000000014
241.473	331.184	5972.51	25	1000000015
91.3463	297.102	5974	25	1000000069
40.7215	318.824	5975.21	25	1000000031
36.1246	332.307	5975.55	25	1000000085
197.893	296.156	5976.9	25	1000000061
-5.96046e-08	300.011	5975.96	25	1000000011
55.3161	325.97	5977.18	25	1000000013
208.996	327.33	5979.46	25	1000000027
8.57827	297.518	5982.19	25	1000000068
57.0562	300.998	5980.56	25	1000000018
209.01	361.926	5981.99	25	1000000020
84.3311	262.005	5983.95	25	1000000016
146.95	488.605	5983.88	25	1000000023
193.616	262.558	5986.29	25	1000000019
32.6178	293.875	5985.4	25	1000000059
-5.96046e-08	264.896	5988.01	25	1000000096
80.6794	325.96	5987.43	25	1000000028
237.528	379.262	5987.94	25	1000000029
90.594	330.72	5989.66	25	1000000026
54.4175	460.268	5990.24	25	1000000022
155.131	432.263	5992.95	25	1000000021
196.643	434.124	5995.58	25	1000000088
48.9767	499.672	5994.35	25	1000000080
65.2476	404.635	5997.1	25	1000000072
118.504	506.94	5996.47	25	1000000108
73.3427	275.508	5998.81	25	1000000054
65.1873	347.689	5999.47	25	1000000110
122.672	383.176	5999.32	25	1000000050
93.2393	412.084	5998.94	25	1000000053
141.001	419.886	5998.06	25	1000000030
486.709	327.179	5970.67	25	1000000033
365.28	402.429	5970.73	25	1000000034
312.057	299.523	5972.25	25	1000000032
302.521	345.642	5975.05	25	1000000035
265.205	479.261	5979.03	25	1000000037
446.989	403.47	5980.98	25	1000000038
374.642	412.258	5982.33	25	1000000041
374.93	453.219	5981.5	25	1000000036
296.769	465.157	5984.15	25	1000000039
293.968	488.512	5984.18	25	1000000102
464.303	479.596	5984.77	25	1000000082
375.71	253.77	5989.95	25	1000000042
436.867	302.454	5992.73	25	1000000098
407.381	452.025	5994.76	25	1000000063
405.032	420.144	5996.41	25	1000000056
295.635	256.93	5998.87	25	1000000043
431.256	312.814	6000.01	25	1000000094
168.988	91.3801	6001.31	25	1000000077
250.617	171.1	6000.58	25	1000000003
213.318	79.6277	6010.18	25	1000000044
301.676	211.299	6001.59	25	1000000092
395.84	120.498	6003.73	25	1000000076
394.522	153.608	6008.23	25	1000000109
401.045	70.008	6013.56	25	1000000047
332.611	113.754	6018.26	25	1000000090
466.519	124.628	6019.6	25	1000000074
85.3052	401.31	6000.33	25	1000000111
113.405	484.337	6000.74	25	1000000079
190.072	335.634	6003.61	25	1000000052
154.426	343.798	6003.48	25	1000000112
48.7022	459.22	6004.1	25	1000000051
81.8702	417.39	6004.75	25	1000000025
10.2854	435.155	6004.89	25	1000000087
27.2307	286.614	6008.7	25	1000000055
9.41761	449.832	6007.27	25	1000000024
31.4275	356.167	6009.61	25	1000000067
237.8	380.794	6009.33	25	1000000075
[truncated: 20,233 more rows]

## Sheet: embryo-2-Middle
Position
Position X	Position Y	Position Z	Time	TrackID
-5.96046e-08	107.158	5987.51	1	1000000000
40.4202	108.741	5989.25	1	1000000001
237.312	119.535	5989.32	1	1000000002
149.813	29.7442	5991.08	1	1000000003
54.0898	131.191	5992.92	1	1000000004
201.347	149.139	5993.25	1	1000000005
179.811	190.766	5993.54	1	1000000006
40.2991	60.3946	5995.72	1	1000000007
133.057	214.036	5996.02	1	1000000008
10.3504	118.598	5997.59	1	1000000009
118.689	127.79	5998.07	1	1000000010
190.002	140.271	5998.17	1	1000000011
144.13	55.5741	5999.13	1	1000000012
171.894	209.829	6000.14	1	1000000013
96.2121	142.516	6002.15	1	1000000014
327.346	70.8683	5981.73	1	1000000015
389.535	247.471	5983.83	1	1000000016
429.289	50.8489	5985.56	1	1000000017
262.456	153.388	5990.96	1	1000000018
391.9	164.329	5991.46	1	1000000019
383.205	244.423	5992.09	1	1000000020
259.098	175.033	5996	1	1000000021
425.163	215.1	5994.9	1	1000000022
276.199	13.1276	5996.71	1	1000000023
283.511	127.485	5999.58	1	1000000024
424.03	170.421	6000.23	1	1000000025
455.197	97.2076	6002.07	1	1000000026
326.159	228.18	6001.62	1	1000000027
16.2163	440.508	5970.24	1	1000000028
47.1887	460.898	5976.22	1	1000000029
57.5921	485.754	5978.22	1	1000000030
61.0282	454.466	5982.44	1	1000000031
51.3023	472.24	5985.85	1	1000000032
13.0031	480.206	5987.06	1	1000000033
-5.96046e-08	352.564	5987.52	1	1000000034
148.119	492.742	5987.37	1	1000000035
162.339	401.142	5990.13	1	1000000036
230.488	488.365	5993.92	1	1000000037
190.953	506.94	5995.37	1	1000000038
52.9567	384.742	5997.64	1	1000000039
115.004	506.94	5996.32	1	1000000040
194.994	465.804	5998.49	1	1000000041
133.418	459.665	6000.93	1	1000000042
468.133	355.116	5978.31	1	1000000043
477.629	401.482	5977.85	1	1000000044
471.431	349.933	5986.97	1	1000000045
445.555	371.354	5986.23	1	1000000046
474.288	391.303	5987.17	1	1000000047
385.981	372.799	5988.47	1	1000000048
432.927	299.911	5990.89	1	1000000049
361.277	268.164	5991.79	1	1000000050
427.629	359.601	5994.67	1	1000000051
265.882	270.213	5997.57	1	1000000052
255.794	276.383	5996.55	1	1000000053
457.068	404.823	5996.9	1	1000000054
433.914	449.711	5999.46	1	1000000055
442.909	290.153	6001.61	1	1000000056
430.605	368.85	6001.5	1	1000000057
87.5088	61.4978	6004.03	1	1000000058
170.442	109.449	6003.9	1	1000000059
101.593	157.412	6004.27	1	1000000060
131.658	212.035	6003.37	1	1000000061
61.6103	162.555	6005.7	1	1000000062
205.475	228.222	6005.4	1	1000000063
54.4197	43.6047	6008.46	1	1000000064
27.9588	45.7573	6009.68	1	1000000065
44.9269	200.571	6010.48	1	1000000066
102.721	222.95	6009.7	1	1000000067
188.695	129.111	6013.87	1	1000000068
188.502	152.229	6014.02	1	1000000069
146.604	122.225	6018.77	1	1000000070
20.3657	120.12	6030.56	1	1000000071
265.949	91.3598	6003.68	1	1000000072
353.132	172.707	6005.15	1	1000000073
403.78	143.051	6017.83	1	1000000074
388.443	112.83	6019.56	1	1000000075
38.4859	366.349	6003.15	1	1000000076
248.501	264.832	6005.62	1	1000000077
198.166	367.874	6005.39	1	1000000078
42.5048	417.712	6007.84	1	1000000079
239.945	455.722	6009.26	1	1000000080
182.781	455.586	6009.85	1	1000000081
246.744	429.986	6020.72	1	1000000082
296.565	303.964	6003.9	1	1000000083
462.827	366.499	6004.1	1	1000000084
379.438	438.609	6004.84	1	1000000085
485.841	326.855	6008.99	1	1000000086
345.971	342.624	6009.26	1	1000000087
324.627	301.995	6012.69	1	1000000088
459.659	333.079	6023.69	1	1000000089
-5.96046e-08	105.313	5987.89	2	1000000000
150.261	27.5388	5991.04	2	1000000003
40.3142	105.843	5990	2	1000000001
237.566	117.965	5990.1	2	1000000002
51.2649	130.774	5992.73	2	1000000004
200.379	149.09	5992.18	2	1000000005
179.521	188.694	5992.97	2	1000000006
133.855	214.824	5992.54	2	1000000008
21.4574	236.806	5992.47	2	1000000090
38.1192	58.604	5995.96	2	1000000007
130.839	108.2	5996.84	2	1000000091
11.6032	116.97	5996.99	2	1000000009
190.29	139.697	5996.96	2	1000000011
143.495	54.3693	5999.46	2	1000000012
118.337	127.892	5998.32	2	1000000010
173.55	208.625	5998.61	2	1000000013
329.528	73.3286	5981.28	2	1000000015
391.427	246.211	5982.29	2	1000000016
427.827	51.1437	5985.75	2	1000000017
260.716	153.23	5991.84	2	1000000018
383.934	241.517	5993.44	2	1000000020
260.388	176.501	5995.43	2	1000000021
424.68	214.927	5994.77	2	1000000022
276.057	12.9899	5996.41	2	1000000023
393.493	159.403	5997.63	2	1000000019
455.842	99.2159	5999.85	2	1000000026
283.235	123.903	5999.21	2	1000000024
421.786	168.824	6002.15	2	1000000025
328.235	228.846	6001.59	2	1000000027
19.836	440.735	5969.98	2	1000000028
49.0732	459.016	5976.21	2	1000000029
58.6798	485.842	5979.94	2	1000000030
-5.96046e-08	350.912	5983.94	2	1000000034
63.3873	454.585	5983.8	2	1000000031
52.2337	470.114	5986.43	2	1000000032
148.855	492.202	5986.89	2	1000000035
13.9984	480.202	5987.62	2	1000000033
165.212	401.404	5989.87	2	1000000036
117.644	506.94	5994.04	2	1000000040
232.354	487.375	5996.47	2	1000000037
192.265	506.94	5997.56	2	1000000038
253.466	259.812	6000.41	2	1000000092
55.8399	385.07	5998.7	2	1000000039
195.689	463.775	5999.98	2	1000000041
133.888	459.313	6001.15	2	1000000042
467.936	357.423	5978.22	2	1000000043
481.213	402.862	5979.21	2	1000000044
471.276	349.62	5984.19	2	1000000045
443.916	367.974	5984.7	2	1000000046
387.239	372.257	5988.4	2	1000000048
475.69	388.449	5988.21	2	1000000047
361.804	267.355	5992.16	2	1000000050
432.309	298.875	5992.88	2	1000000049
431.238	358.322	5991.82	2	1000000051
266.762	269.346	5995.89	2	1000000052
457.897	404.301	5995.58	2	1000000054
257.767	276.653	5997.02	2	1000000053
435.014	449.335	5998.35	2	1000000055
469.331	367.334	6002.53	2	1000000084
432.457	369.335	6000.54	2	1000000057
88.1236	58.5398	6004.36	2	1000000058
171.849	109.575	6003.43	2	1000000059
96.6923	143.864	6002.79	2	1000000014
100.898	157.453	6004.15	2	1000000060
133.286	210.973	6002.88	2	1000000061
206.834	223.527	6003.7	2	1000000063
58.5173	157.125	6006.39	2	1000000062
55.0662	40.3172	6008.79	2	1000000064
47.4736	200.068	6009.14	2	1000000066
105.144	223.306	6008.61	2	1000000067
27.7408	44.1685	6010.63	2	1000000065
190.516	149.831	6010.03	2	1000000069
189.403	128.257	6013.71	2	1000000068
23.3617	118.174	6029.77	2	1000000071
267.158	88.9912	6004.86	2	1000000072
354.849	169.189	6005.15	2	1000000073
389.98	109.226	6018.08	2	1000000075
403.811	143.053	6020.18	2	1000000074
41.6161	364.454	6003.04	2	1000000076
197.586	365.525	6006.27	2	1000000078
43.6442	417.207	6006.84	2	1000000079
251.68	265.168	6007.63	2	1000000077
241.227	453.911	6009.68	2	1000000080
181.1	454.397	6012.03	2	1000000081
244.665	429.765	6018.34	2	1000000082
443.636	288.423	6003.38	2	1000000056
299.185	304.076	6003.78	2	1000000083
380.254	441.002	6006.27	2	1000000085
487.049	324.194	6008.44	2	1000000086
347.472	340.47	6008.14	2	1000000087
325.013	300.017	6012.15	2	1000000088
309.066	339.339	6022.06	2	1000000093
460.502	330.451	6023.28	2	1000000089
39.0744	102.45	5989.13	3	1000000001
-5.96046e-08	104.639	5988.24	3	1000000000
237.366	115.546	5988.63	3	1000000002
50.7837	130.879	5990.23	3	1000000004
200.278	149.241	5991.05	3	1000000005
149.403	27.0063	5992.75	3	1000000003
179.978	187.512	5993.41	3	1000000006
133.5	215.042	5992.41	3	1000000008
37.1667	56.9955	5995.36	3	1000000007
130.487	108.493	5995.44	3	1000000091
191.704	139.491	5994.78	3	1000000011
14.421	114.424	5996.31	3	1000000009
116.521	128.503	5998.14	3	1000000010
142.977	51.9331	5999.27	3	1000000012
176.413	206.743	5998.36	3	1000000013
89.5248	58.5123	6002.28	3	1000000058
172.478	105.769	6001.3	3	1000000059
96.8094	144.832	6001.29	3	1000000014
207.692	220.409	6001.8	3	1000000063
328.699	70.8191	5981.03	3	1000000015
393.531	244.487	5981.56	3	1000000016
429.395	51.3025	5985.8	3	1000000017
260.045	153.602	5989.59	3	1000000018
382.814	242.537	5991.62	3	1000000020
262.584	176.9	5993.73	3	1000000021
394.678	155.619	5995.97	3	1000000019
425.291	214.288	5994.59	3	1000000022
453.269	98.7046	5996.73	3	1000000026
277.467	12.1879	5998.94	3	1000000023
282.727	121.314	5999.51	3	1000000024
421.06	166.902	6001.61	3	1000000025
329.448	227.827	6000.64	3	1000000027
23.6174	440.281	5972.64	3	1000000028
50.5483	457.422	5976.6	3	1000000029
60.216	485.675	5979.91	3	1000000030
-5.96046e-08	349.496	5982.31	3	1000000034
65.016	454.65	5983.07	3	1000000031
149.474	491.44	5985.1	3	1000000035
52.3685	468.46	5987	3	1000000032
15.2051	480.366	5987.2	3	1000000033
168.922	401.972	5991.3	3	1000000036
119.918	506.94	5992.59	3	1000000040
187.241	506.94	5996.08	3	1000000038
58.5362	383.328	5997.51	3	1000000039
231.746	486.577	5996.71	3	1000000037
251.688	258.385	5998.36	3	1000000092
196.121	462.4	5998.62	3	1000000041
43.4913	364.066	6001.13	3	1000000076
133.649	458.68	6000.81	3	1000000042
467.642	357.935	5977.58	3	1000000043
482.675	403.338	5978.08	3	1000000044
472.696	348.731	5982.59	3	1000000045
445.43	365.215	5985.77	3	1000000046
386.811	371.686	5987.9	3	1000000048
475.252	387.814	5987.89	3	1000000047
363.619	268.815	5991.42	3	1000000050
433.066	297.138	5990.89	3	1000000049
433.636	355.865	5990.79	3	1000000051
429.63	468.46	5990.66	3	1000000094
458.891	402.375	5994.67	3	1000000054
267.396	268.323	5996.52	3	1000000052
259.13	276.282	5996.54	3	1000000053
439.042	449.411	5996.91	3	1000000055
470.283	366.115	5999.55	3	1000000084
433.433	368.901	6002.35	3	1000000057
77.4519	115.727	6004.02	3	1000000095
101.807	158.016	6004.16	3	1000000060
133.624	209.436	6004.44	3	1000000061
193.067	145.823	6007	3	1000000069
57.0214	152.453	6007.57	3	1000000062
47.2304	197.891	6008.65	3	1000000066
28.9293	41.4354	6010.84	3	1000000065
105.522	222.445	6009.45	3	1000000067
192.505	125.268	6012.4	3	1000000068
145.038	119.63	6017.21	3	1000000070
26.4336	117.874	6029.23	3	1000000071
267.548	86.3552	6004.16	3	1000000072
355.787	166.401	6005.55	3	1000000073
389.926	108.087	6018.36	3	1000000075
402.38	143.518	6023.64	3	1000000074
199.303	363.774	6005.75	3	1000000078
250.399	262.722	6008.58	3	1000000077
44.3605	417.267	6007.72	3	1000000079
181.177	454.446	6011.2	3	1000000081
244.374	454.984	6009.43	3	1000000080
241.714	427.966	6017.5	3	1000000082
443.254	288.272	6003.63	3	1000000056
299.783	302.446	6003.18	3	1000000083
382.38	439.489	6004.13	3	1000000085
347.918	341.883	6006.35	3	1000000087
487.475	322.774	6008.9	3	1000000086
325.872	301.123	6012.51	3	1000000088
308.529	336.55	6019.79	3	1000000093
461.527	326.298	6023.08	3	1000000089
-5.96046e-08	103.815	5986.69	4	1000000000
40.7256	100.021	5989.27	4	1000000001
237.812	112.815	5989.59	4	1000000002
49.3456	130.214	5990.57	4	1000000004
199.043	148.861	5990.98	4	1000000005
20.5162	234.417	5990.15	4	1000000090
149.979	25.8465	5993.09	4	1000000003
193.023	138.24	5993.85	4	1000000011
180.494	185.528	5992.24	4	1000000006
-5.96046e-08	196.702	5991.72	4	1000000096
132.886	214.569	5992.19	4	1000000008
35.8944	55.8105	5994.82	4	1000000007
17.299	113.89	5997	4	1000000009
177.777	205.395	5998.12	4	1000000013
140.722	49.1997	5999.34	4	1000000012
116.903	126.534	5998.73	4	1000000010
174.747	107.557	6001.76	4	1000000059
95.0623	142.399	6001.8	4	1000000014
207.774	215.81	6002.01	4	1000000063
328.061	70.0428	5981.48	4	1000000015
394.493	243.02	5981.17	4	1000000016
429.119	49.8974	5986.42	4	1000000017
261.111	153.93	5990.14	4	1000000018
264.567	176.74	5991.54	4	1000000021
384.279	239.92	5992.39	4	1000000020
425.055	211.47	5994.7	4	1000000022
452.535	97.0744	5996.12	4	1000000026
393.175	150.546	5996.6	4	1000000019
335.276	227.518	5997.24	4	1000000027
279.062	11.7523	5998.52	4	1000000023
282.356	118.715	5999.39	4	1000000024
25.0335	439.349	5972.45	4	1000000028
53.0962	456.706	5977.27	4	1000000029
-5.96046e-08	350.371	5981.75	4	1000000034
60.1207	485.221	5981.48	4	1000000030
119.134	445.592	5984.98	4	1000000097
67.277	455.914	5985.03	4	1000000031
148.237	491.045	5984.16	4	1000000035
52.0488	468.214	5988.52	4	1000000032
16.6375	479.708	5987.96	4	1000000033
168.835	400.23	5991.24	4	1000000036
119.755	506.94	5992.37	4	1000000040
184.043	506.94	5995.78	4	1000000038
253.181	256.1	5996.97	4	1000000092
197.238	460.911	5997.87	4	1000000041
232.476	485.663	5996.66	4	1000000037
62.8246	382.18	5998.88	4	1000000039
131.915	459.203	6000.2	4	1000000042
44.3385	361.34	6001.53	4	1000000076
484.662	401.546	5977.16	4	1000000044
468.974	356.969	5979.54	4	1000000043
473.807	344.842	5982.46	4	1000000045
443.788	363.649	5988.73	4	1000000046
366.314	267.339	5989.82	4	1000000050
389.579	371.942	5990.88	4	1000000048
459.517	399.878	5991.21	4	1000000054
430.859	466.454	5990.83	4	1000000094
435.113	354.511	5992.21	4	1000000051
475.419	386.4	5991.87	4	1000000047
267.061	265.645	5994.59	4	1000000052
261.09	276.13	5995.84	4	1000000053
473.408	365.793	5995.46	4	1000000084
440.785	447.342	5997.27	4	1000000055
448.458	287.628	6002.41	4	1000000056
433.53	367.393	6001.89	4	1000000057
89.9399	57.1411	6003.65	4	1000000058
136.292	208.468	6003.58	4	1000000061
102.289	154.405	6006.39	4	1000000060
75.6038	113.873	6007.73	4	1000000095
195.894	140.692	6007.44	4	1000000069
57.5216	149.77	6008.17	4	1000000062
49.8994	195.472	6007.71	4	1000000066
105.606	220.907	6007.69	4	1000000067
54.1561	37.1123	6011.28	4	1000000064
27.6971	41.2813	6009.75	4	1000000065
196.285	122.192	6011.81	4	1000000068
145.418	118.015	6016.53	4	1000000070
26.6196	115.767	6028.44	4	1000000071
267.581	81.7925	6002.71	4	1000000072
420.076	164.826	6004.62	4	1000000025
357.53	163.1	6005.5	4	1000000073
390.075	106.39	6019.47	4	1000000075
402.394	142.632	6024.03	4	1000000074
200.085	362.474	6005.66	4	1000000078
45.7117	415.083	6006.8	4	1000000079
244.529	453.328	6008.41	4	1000000080
250.568	260.699	6009.69	4	1000000077
181.119	454.423	6010.59	4	1000000081
241.377	425.891	6017.52	4	1000000082
300.723	300.883	6003.51	4	1000000083
349.621	342.34	6003.65	4	1000000087
380.774	439.849	6005.93	4	1000000085
488.853	320.467	6008.03	4	1000000086
326.744	298.334	6014.03	4	1000000088
309.294	334.593	6017.73	4	1000000093
461.521	324.56	6021.32	4	1000000089
41.2131	98.3996	5988.88	5	1000000001
-5.96046e-08	103.383	5988.66	5	1000000000
238.283	111.088	5988.12	5	1000000002
49.3755	129.881	5989.32	5	1000000004
200.612	146.921	5991.13	5	1000000005
-5.96046e-08	196.257	5990.48	5	1000000096
20.3474	232.393	5990.41	5	1000000090
149.891	25.3551	5993.1	5	1000000003
34.0619	54.953	5993.63	5	1000000007
181.432	184.226	5992.15	5	1000000006
133.501	214.125	5992.11	5	1000000008
132.23	110.134	5994.8	5	1000000091
194.78	137.63	5994.18	5	1000000011
21.0331	112.832	5996.84	5	1000000009
54.6819	243.058	5996.93	5	1000000098
141.007	48.8239	5999.13	5	1000000012
119.45	124.04	5999.05	5	1000000010
96.148	143.904	5999.97	5	1000000014
178.515	204.006	5998.74	5	1000000013
176.468	105.7	6000.94	5	1000000059
209.089	211.368	6000.95	5	1000000063
396.401	243.138	5979.25	5	1000000016
328.905	68.8809	5982.19	5	1000000015
430.654	51.2477	5987.9	5	1000000017
386.756	238.145	5988.8	5	1000000020
261.242	153.608	5989.98	5	1000000018
265.634	177.632	5990.72	5	1000000021
422.374	210.706	5993.25	5	1000000022
451.267	95.4487	5994.49	5	1000000026
254.508	252.672	5995.01	5	1000000092
278.679	11.1736	5997.94	5	1000000023
392.898	149.703	5996.53	5	1000000019
334.642	225.324	5997.55	5	1000000027
283.573	116.836	5998.65	5	1000000024
268.208	80.0648	6001.1	5	1000000072
419.168	164.84	6002.64	5	1000000025
26.3771	439.269	5972.49	5	1000000028
56.4513	455.615	5978.66	5	1000000029
62.2708	485.725	5982.74	5	1000000030
-5.96046e-08	350.209	5983.19	5	1000000034
69.7977	454.995	5984.93	5	1000000031
147.776	491.189	5984.64	5	1000000035
120.068	443.745	5985.22	5	1000000097
17.3379	478.898	5988.04	5	1000000033
171.563	400.575	5989.74	5	1000000036
53.5864	467.018	5989.65	5	1000000032
123.379	506.94	5991.31	5	1000000040
185.576	502.701	5993.7	5	1000000038
232.404	485.761	5994.65	5	1000000037
198.145	462.509	5997.32	5	1000000041
66.7546	381.916	5999.42	5	1000000039
132.003	459.159	6000.46	5	1000000042
45.6017	360.758	6000.69	5	1000000076
485.325	399.558	5976.82	5	1000000044
467.089	356.155	5979.62	5	1000000043
474.87	342.222	5983.35	5	1000000045
368.902	266.467	5988.4	5	1000000050
444.041	360.1	5988.49	5	1000000046
267.704	264.846	5991.02	5	1000000052
435.799	293.349	5990.85	5	1000000049
438.436	349.443	5991.1	5	1000000051
475.712	362.719	5991.29	5	1000000084
391.835	370.203	5990.51	5	1000000048
457.958	397.107	5990.04	5	1000000054
431.729	464.93	5991.06	5	1000000094
262.323	275.999	5993.35	5	1000000053
476.066	384.154	5992.26	5	1000000047
435.819	363.071	5997.11	5	1000000057
441.481	445.766	5999.15	5	1000000055
449.29	286.557	6002.06	5	1000000056
136.224	204.68	6003.1	5	1000000061
89.5112	58.5412	6006.05	5	1000000058
58.222	146.792	6006.88	5	1000000062
50.5984	195.982	6006	5	1000000066
196.732	137.916	6008.72	5	1000000069
107.519	221.281	6008.19	5	1000000067
26.6477	40.2252	6009.81	5	1000000065
146.669	116.166	6013.21	5	1000000070
197.095	122.489	6012.86	5	1000000068
26.6298	114.447	6028.52	5	1000000071
357.551	162.701	6006.03	5	1000000073
390.01	104.854	6020.73	5	1000000075
402.313	142.959	6023.35	5	1000000074
201.175	360.4	6005.94	5	1000000078
45.7804	414.957	6006.56	5	1000000079
245.706	451.151	6008.26	5	1000000080
250.591	259.621	6012.83	5	1000000077
178.019	454.912	6012.11	5	1000000081
241.805	424.635	6016.24	5	1000000082
303.328	298.725	6003.89	5	1000000083
350.245	342.332	6002.91	5	1000000087
381.146	437.206	6004.86	5	1000000085
490.149	318.046	6006.27	5	1000000086
328.221	297.594	6013.1	5	1000000088
308.712	334.377	6015.22	5	1000000093
462.499	323.305	6018.17	5	1000000089
-5.96046e-08	103.03	5989.01	6	1000000000
238.714	110.173	5988.56	6	1000000002
48.7378	129.687	5988.68	6	1000000004
42.2361	96.2098	5990.35	6	1000000001
200.53	146.568	5989.96	6	1000000005
181.253	181.634	5991.16	6	1000000006
19.2717	232.144	5990.3	6	1000000090
195.352	137.276	5992.54	6	1000000011
1.54193	194.722	5992.98	6	1000000096
133.148	212.775	5992.32	6	1000000008
150.374	25.3675	5995.4	6	1000000003
33.6084	53.5959	5993.91	6	1000000007
130.902	109.415	5995.71	6	1000000091
55.927	242.677	5997.92	6	1000000098
140.214	46.3493	5999.74	6	1000000012
23.4331	111.222	5999.82	6	1000000009
117.205	122.385	5998.78	6	1000000010
182.624	199.808	5998.49	6	1000000013
176.033	103.104	6001.11	6	1000000059
96.4539	146.719	6000.82	6	1000000014
134.09	200.212	6000.97	6	1000000061
210.247	208.239	6000.98	6	1000000063
397.041	242.654	5978.92	6	1000000016
326.929	67.9589	5982.01	6	1000000015
431.839	49.7403	5988.73	6	1000000017
267.784	178.661	5988.04	6	1000000021
263.682	153.466	5990.3	6	1000000018
388.491	235.782	5990.6	6	1000000020
450.677	93.8713	5992.63	6	1000000026
390.342	145.552	5992.78	6	1000000019
422.111	206.325	5993.35	6	1000000022
282.292	115.588	5996.73	6	1000000024
333.975	224.43	5997.84	6	1000000027
254.753	250.13	5996.57	6	1000000092
278.784	11.6607	5999.41	6	1000000023
267.948	74.202	6000.18	6	1000000072
28.5224	438.734	5973.47	6	1000000028
59.4035	455.401	5977.34	6	1000000029
-5.96046e-08	349.75	5981.88	6	1000000034
120.063	440.252	5984.31	6	1000000097
63.3085	485.459	5983.71	6	1000000030
148.038	491.361	5983.99	6	1000000035
70.9776	452.831	5985.88	6	1000000031
54.1515	466.911	5988.37	6	1000000032
18.8672	477.589	5987.92	6	1000000033
174.353	399.34	5989.56	6	1000000036
232.14	487.101	5992.96	6	1000000037
183.411	503.479	5993.32	6	1000000038
125.074	506.94	5992.24	6	1000000040
199.916	464.651	5996.48	6	1000000041
46.0343	360.227	5999.19	6	1000000076
68.9144	380.816	5999.17	6	1000000039
133.493	461.106	6001	6	1000000042
487.512	397.415	5976.84	6	1000000044
470.175	354.692	5980.04	6	1000000043
475.592	340.264	5982.26	6	1000000045
443.502	356.911	5986.76	6	1000000046
269.867	262.802	5989.3	6	1000000052
372.242	267.731	5990.92	6	1000000050
437.134	290.18	5990.18	6	1000000049
442.092	344.041	5991.2	6	1000000051
478.885	360.208	5991.67	6	1000000084
391.357	375.297	5989.94	6	1000000048
457.837	396.661	5990.57	6	1000000054
432.465	461.275	5989.71	6	1000000094
263.598	274.742	5992.47	6	1000000053
474.886	382.15	5992.74	6	1000000047
438.147	359.162	5994.63	6	1000000057
268.247	266.917	5999.78	6	1000000099
351.713	338.559	6001.44	6	1000000087
442.7	443.397	5999.13	6	1000000055
90.6418	57.1884	6006.17	6	1000000058
73.9889	111.045	6006.37	6	1000000095
59.3251	144.461	6007.09	6	1000000062
50.4475	194.64	6006.77	6	1000000066
106.42	221.379	6005.9	6	1000000067
28.8882	37.0487	6008.97	6	1000000065
199.188	133.663	6008.05	6	1000000069
105.199	152.705	6007.98	6	1000000060
54.1726	35.8379	6011.1	6	1000000064
146.276	116.468	6013.9	6	1000000070
197.08	120.692	6014.24	6	1000000068
25.7668	110.304	6026.98	6	1000000071
51.0929	113.853	6027.3	6	1000000100
-5.96046e-08	120.4	6030.44	6	1000000101
418.698	161.53	6003.85	6	1000000025
360.337	161.195	6005.85	6	1000000073
331.122	180.092	6009.88	6	1000000102
310.2	148.837	6012.34	6	1000000103
404.948	139.312	6020.51	6	1000000074
390.22	102.468	6023.69	6	1000000075
47.1348	415.312	6004.65	6	1000000079
203.428	358.096	6005.12	6	1000000078
245.464	450.096	6006.04	6	1000000080
201.519	443.566	6010.05	6	1000000104
177.318	456.259	6013.11	6	1000000081
251.187	257.631	6014.67	6	1000000077
242.886	421.738	6016.63	6	1000000082
451.623	282.808	6004.59	6	1000000056
304.697	297.986	6004.51	6	1000000083
381.958	435.16	6004.55	6	1000000085
493.108	316.459	6005.85	6	1000000086
307.829	329.922	6012.69	6	1000000093
330.032	295.473	6015.99	6	1000000088
465.033	322.649	6016.68	6	1000000089
4.08684	102.567	5988.63	7	1000000000
48.2648	129.441	5988.03	7	1000000004
44.1204	93.7041	5990.48	7	1000000001
235.756	110.205	5989.57	7	1000000002
199.892	145.618	5990.75	7	1000000005
181.043	181.334	5990.88	7	1000000006
17.7637	230.706	5990.98	7	1000000090
33.903	53.6351	5992.81	7	1000000007
196.993	135.854	5993.9	7	1000000011
3.34427	193.651	5993.4	7	1000000096
132.894	212.054	5993.09	7	1000000008
148.912	23.9187	5996.83	7	1000000003
132.729	109.541	5996.82	7	1000000091
55.2182	240.538	5998.09	7	1000000098
141.298	44.0705	5999.86	7	1000000012
118.664	121.089	5999.28	7	1000000010
98.5856	147.318	6000.39	7	1000000014
135.017	197.754	5999.55	7	1000000061
186.936	198.034	6000.06	7	1000000013
175.019	96.8661	6000.83	7	1000000059
24.543	109.168	6002.22	7	1000000009
209.891	207.275	6001.16	7	1000000063
399.965	241.483	5978.31	7	1000000016
326.624	67.4781	5983.71	7	1000000015
432.694	48.7884	5988.98	7	1000000017
268.396	177.629	5988.65	7	1000000021
390.35	143.516	5990.18	7	1000000019
264.95	152.309	5990.47	7	1000000018
391.232	232.987	5989.99	7	1000000020
451.488	92.9144	5992.39	7	1000000026
423.948	203.062	5993.89	7	1000000022
279.864	113.86	5997.25	7	1000000024
255.458	247.104	5996.38	7	1000000092
280.534	11.2025	5999.61	7	1000000023
333.482	220.408	6000.17	7	1000000027
269.598	71.9873	6001.62	7	1000000072
31.0519	438.914	5974.59	7	1000000028
63.4299	455.417	5977.61	7	1000000029
-5.96046e-08	349.227	5981.78	7	1000000034
121.49	438.773	5985.12	7	1000000097
76.2791	452.215	5986.17	7	1000000031
65.6057	484.567	5985.88	7	1000000030
146.994	492.161	5985.65	7	1000000035
177.305	395.672	5988.18	7	1000000036
55.9801	467.111	5989.47	7	1000000032
19.5726	477.89	5987.96	7	1000000033
232.221	489.007	5993.2	7	1000000037
130.462	506.94	5991.96	7	1000000040
184.924	506.94	5991.77	7	1000000038
201.204	464.847	5995.09	7	1000000041
47.652	359.35	5997.67	7	1000000076
72.8009	379.727	5997.93	7	1000000039
134.077	462.523	6000.99	7	1000000042
488.79	394.975	5976.32	7	1000000044
476.821	338.679	5982.39	7	1000000045
473.658	354.663	5981.28	7	1000000043
421.332	405.288	5987.28	7	1000000105
270.533	261.769	5988.66	7	1000000052
444.842	337.55	5989.1	7	1000000051
443.3	355.045	5988.56	7	1000000046
374.488	270.495	5990.59	7	1000000050
266.592	274.373	5991.37	7	1000000053
436.918	290.337	5989.78	7	1000000049
391.925	380.689	5991.36	7	1000000048
434.469	459.143	5990.89	7	1000000094
474.874	379.183	5993.75	7	1000000047
458.538	395.905	5992.36	7	1000000054
480.381	356.529	5994.29	7	1000000084
267.987	264.432	5999.98	7	1000000099
446.11	439.772	5999.66	7	1000000055
353.679	338.072	6002.04	7	1000000087
73.78	110.568	6006.2	7	1000000095
107.109	218.465	6006.23	7	1000000067
32.0336	34.1996	6008.21	7	1000000065
92.5781	56.4504	6007.57	7	1000000058
128.285	87.1327	6007.92	7	1000000106
204.033	129.858	6008.46	7	1000000069
63.1881	142.26	6007.15	7	1000000062
110.242	149.506	6008.76	7	1000000060
53.3065	191.662	6008.12	7	1000000066
146.431	113.417	6010.84	7	1000000070
198.171	117.379	6014.92	7	1000000068
241.95	165.837	6017.32	7	1000000107
53.9706	112.3	6023.66	7	1000000100
26.9142	107.954	6025.77	7	1000000071
-5.96046e-08	116.564	6028.7	7	1000000101
416.138	160.666	6004.53	7	1000000025
361.47	160.794	6005.61	7	1000000073
309.262	143.455	6010.5	7	1000000103
330.671	178.781	6009.35	7	1000000102
404.75	138.167	6019.27	7	1000000074
391.51	100.683	6024.3	7	1000000075
205.564	354.674	6005.4	7	1000000078
41.675	368.239	6005.67	7	1000000108
46.7863	415.895	6005.47	7	1000000079
201.338	444.635	6006.45	7	1000000104
242.627	449.297	6007.17	7	1000000080
177.503	457.28	6010.99	7	1000000081
249.965	256.37	6015.19	7	1000000077
244.259	419.32	6016.07	7	1000000082
304.78	294.677	6004.67	7	1000000083
386.036	434.624	6004.63	7	1000000085
402.866	465.115	6003.45	7	1000000109
497.011	313.881	6005.81	7	1000000086
455.029	278.351	6009.07	7	1000000056
466.304	321.753	6012.86	7	1000000089
307.964	330.199	6012.84	7	1000000093
333.306	292.423	6014.53	7	1000000088
6.61914	102.657	5989.42	8	1000000000
47.7833	129.233	5987.88	8	1000000004
44.6424	92.0715	5991.33	8	1000000001
234.389	110.099	5990.03	8	1000000002
196.774	147.647	5991.32	8	1000000005
182.231	180.922	5990.7	8	1000000006
18.8349	229.194	5991.37	8	1000000090
32.7529	52.4038	5992.35	8	1000000007
197.689	134.278	5993.72	8	1000000011
131.537	110.411	5995.86	8	1000000091
6.46297	192.502	5994.37	8	1000000096
133.902	210.519	5993.9	8	1000000008
-5.96046e-08	21.9419	5997.24	8	1000000110
148.921	23.6591	5998.12	8	1000000003
142.906	42.5319	5999.75	8	1000000012
134.992	194.287	6000.02	8	1000000061
118.084	120.228	6002.31	8	1000000010
103.928	151.053	6000.53	8	1000000014
188.454	194.782	6001.23	8	1000000013
211.536	204.596	6001.19	8	1000000063
57.7378	237.657	6000.82	8	1000000098
400.961	240.306	5977.84	8	1000000016
326.789	66.2043	5982.51	8	1000000015
432.003	47.1293	5987.68	8	1000000017
391.79	139.519	5988.6	8	1000000019
452.915	91.9826	5989.95	8	1000000026
265.841	152.497	5990.52	8	1000000018
270.221	179.034	5991.15	8	1000000021
394.083	229.828	5990.04	8	1000000020
424.156	201.192	5995.67	8	1000000022
278.068	111.236	5997.93	8	1000000024
256.639	240.788	5997.33	8	1000000092
279.682	9.43675	5999.8	8	1000000023
335.548	216.044	5998.92	8	1000000027
268.386	69.4715	6001.39	8	1000000072
31.1262	438.412	5975.09	8	1000000028
65.7873	455.143	5978.76	8	1000000029
2.25827	347.619	5983.61	8	1000000034
125.191	433.946	5984.37	8	1000000097
79.125	451.174	5985.73	8	1000000031
147.192	492.065	5986.13	8	1000000035
178.26	393.665	5988	8	1000000036
21.5068	477.742	5987.71	8	1000000033
67.1091	483.037	5988.73	8	1000000030
56.5361	465.775	5992.06	8	1000000032
232.944	487.672	5993.03	8	1000000037
186.765	502.573	5992.08	8	1000000038
132.764	506.94	5991.73	8	1000000040
203.052	463.889	5994.22	8	1000000041
48.4787	358.382	5997.43	8	1000000076
74.644	378.881	5997.92	8	1000000039
137.345	460.964	6000.96	8	1000000042
489.749	393.636	5976.31	8	1000000044
476.373	329.566	5980.5	8	1000000045
478.414	353.763	5980.28	8	1000000043
444.763	331.843	5987.08	8	1000000051
424.533	398.817	5986.49	8	1000000105
272.246	260.254	5987.97	8	1000000052
439.344	286.11	5987.88	8	1000000049
447.312	350.77	5988.95	8	1000000046
457.387	391.503	5989.49	8	1000000054
375.632	268.536	5991.64	8	1000000050
269.002	271.873	5991.5	8	1000000053
484.763	352.248	5992.95	8	1000000084
438.172	354.187	5992.64	8	1000000057
392.991	383.481	5992.41	8	1000000048
435.715	459.203	5992.74	8	1000000094
477.617	376.099	5995.76	8	1000000047
448.443	435.261	5996.33	8	1000000055
270.654	262.621	5998.4	8	1000000099
355.713	335.93	6000.4	8	1000000087
388.335	433.48	6002.1	8	1000000085
401.767	462.932	6000.63	8	1000000109
93.4898	53.654	6004.78	8	1000000058
174.869	91.862	6002.77	8	1000000059
24.0464	107.529	6003.57	8	1000000009
128.606	84.9203	6006.41	8	1000000106
71.5915	110.978	6006.75	8	1000000095
108.977	217.772	6005.67	8	1000000067
145.094	110.873	6008.54	8	1000000070
207.898	129.215	6007.82	8	1000000069
65.9742	138.584	6008.8	8	1000000062
114.553	149.889	6008.21	8	1000000060
54.5175	190.584	6008.35	8	1000000066
34.2654	31.5654	6010.42	8	1000000065
60.8784	31.4444	6013.1	8	1000000064
197.421	115.026	6014.5	8	1000000068
239.282	163.53	6016.92	8	1000000107
55.418	111.417	6022.35	8	1000000100
27.8931	106.293	6026.15	8	1000000071
-5.96046e-08	115.341	6028.8	8	1000000101
414.456	160.031	6005.34	8	1000000025
309.115	137.965	6008.87	8	1000000103
362.443	160.767	6008.44	8	1000000073
333.289	175.656	6010.35	8	1000000102
407.543	135.293	6017.9	8	1000000074
48.0054	415.674	6004.24	8	1000000079
201.03	445.329	6004.22	8	1000000104
208.48	352.692	6005.28	8	1000000078
41.5438	369.198	6005.62	8	1000000108
245.019	448.858	6005.51	8	1000000080
180.929	456.711	6011	8	1000000081
251.04	255.031	6015.4	8	1000000077
246.403	414.726	6016.26	8	1000000082
305.98	292.813	6004.08	8	1000000083
497.462	315.976	6004.68	8	1000000086
457.74	274.044	6008.85	8	1000000056
308.272	330.411	6012.17	8	1000000093
334.072	287.662	6013.83	8	1000000088
465.626	318.249	6014.12	8	1000000089
49.1735	128.484	5986.7	9	1000000004
7.2843	101.638	5989.17	9	1000000000
233.51	110.521	5989.73	9	1000000002
195.769	147.005	5991.14	9	1000000005
183.917	179.663	5991.2	9	1000000006
19.9336	227.808	5991.15	9	1000000090
32.5022	51.5234	5993.05	9	1000000007
41.8437	90.3381	5991.79	9	1000000001
196.616	133.261	5993.89	9	1000000011
134.229	209.306	5993.13	9	1000000008
-5.96046e-08	21.7524	5996.91	9	1000000110
8.3982	190.485	5996.97	9	1000000096
148.747	22.042	5999.73	9	1000000003
107.387	154.597	6000.4	9	1000000014
134.865	193.062	5998.6	9	1000000061
145.539	40.0603	6002.15	9	1000000012
212.864	204.191	6001.52	9	1000000063
57.0259	235.52	6001.17	9	1000000098
402.416	239.483	5977.11	9	1000000016
325.118	65.3156	5983.16	9	1000000015
429.999	46.2059	5986.97	9	1000000017
391.533	138.37	5988.11	9	1000000019
452.204	91.4114	5989.66	9	1000000026
267.675	150.741	5991.36	9	1000000018
395.348	227.356	5989.73	9	1000000020
269.247	179.998	5994.52	9	1000000021
422.101	198.058	5996.84	9	1000000022
259.295	237.212	5996.91	9	1000000092
280.084	8.02678	6000.16	9	1000000023
277.203	109.193	5999	9	1000000024
334.604	212.782	5998.57	9	1000000027
268.962	65.8254	6002.42	9	1000000072
33.9919	436.802	5975.69	9	1000000028
68.1064	454.462	5980.24	9	1000000029
3.87448	347.598	5982.51	9	1000000034
127.297	431.331	5984.12	9	1000000097
81.873	451.651	5985.92	9	1000000031
178.578	390.58	5989.23	9	1000000036
22.1144	477.034	5988.43	9	1000000033
147.162	492.089	5987.6	9	1000000035
68.2787	481.438	5990.81	9	1000000030
206.642	460.249	5993.81	9	1000000041
58.4756	462.897	5993.09	9	1000000032
233.644	486.166	5993.69	9	1000000037
134.754	504.761	5993.6	9	1000000040
50.0224	356.687	5995.59	9	1000000076
76.9738	375.939	5999.18	9	1000000039
137.844	459.966	6001.51	9	1000000042
489.198	388.503	5974.96	9	1000000044
474.869	325.4	5980.4	9	1000000045
480.238	353.208	5981.13	9	1000000043
273.094	260.346	5987.08	9	1000000052
445.55	326.764	5985.4	9	1000000051
442.152	284.82	5988.08	9	1000000049
447.893	349.271	5989.27	9	1000000046
459.956	385.693	5989.33	9	1000000054
426.785	394.569	5988.11	9	1000000105
271.331	271.678	5991.27	9	1000000053
376.587	270.38	5992.64	9	1000000050
485.928	349.621	5992.65	9	1000000084
438.26	352.554	5992.92	9	1000000057
449.55	434.968	5993.83	9	1000000055
433.965	457.543	5992.09	9	1000000094
393.7	383.949	5995.76	9	1000000048
270.757	261.284	5996.19	9	1000000099
479.242	373.85	5996.68	9	1000000047
498.857	312.856	6001.72	9	1000000086
386.443	433.716	6002.51	9	1000000085
399.504	461.122	6001.96	9	1000000109
175.327	89.1047	6003.41	9	1000000059
23.9436	105.123	6002.87	9	1000000009
117.017	117.912	6003.15	9	1000000010
191.543	193.309	6002.92	9	1000000013
108.311	218.577	6004.31	9	1000000067
95.4141	52.069	6006.25	9	1000000058
129.365	82.5277	6006.18	9	1000000106
71.1751	110.157	6006.31	9	1000000095
145.366	108.939	6006.82	9	1000000070
117.373	149.298	6006.76	9	1000000060
210.747	125.692	6008.32	9	1000000069
67.3385	133.964	6007.49	9	1000000062
56.9168	187.782	6009.09	9	1000000066
33.6376	31.4556	6010.47	9	1000000065
197.446	114.547	6012.63	9	1000000068
62.5109	29.8955	6014.35	9	1000000064
240.903	160.321	6017.04	9	1000000107
56.0038	110.719	6020.81	9	1000000100
27.7631	104.872	6026.76	9	1000000071
-5.96046e-08	113.085	6026.19	9	1000000101
413.544	158.412	6006.13	9	1000000025
309.968	133.218	6008.92	9	1000000103
362.055	160.349	6010.92	9	1000000073
333.564	174.349	6010.47	9	1000000102
409.457	133.321	6015.68	9	1000000074
392.28	96.5922	6023.4	9	1000000075
211.252	350.36	6004.48	9	1000000078
42.6512	368.008	6003.79	9	1000000108
48.0998	414.754	6003.31	9	1000000079
201.563	443.156	6003	9	1000000104
246.334	446.152	6005.04	9	1000000080
181.269	455.319	6010.28	9	1000000081
247.039	412.087	6013.21	9	1000000082
250.779	254.102	6015.38	9	1000000077
359.036	335.592	6002.74	9	1000000087
308.509	290.817	6005.61	9	1000000083
457.572	270.916	6008.19	9	1000000056
466.417	314.353	6012.05	9	1000000089
308.09	330.415	6011.77	9	1000000093
334.194	285.204	6014.26	9	1000000088
49.3481	127.801	5986.93	10	1000000004
7.49105	99.8042	5989.29	10	1000000000
232.264	110.928	5987.96	10	1000000002
184.166	179.292	5989.52	10	1000000006
111.455	223.29	5991.14	10	1000000111
18.4946	227.212	5990.65	10	1000000090
33.7008	48.9172	5993.02	10	1000000007
39.9055	88.9402	5992.2	10	1000000001
195.452	131.796	5993.5	10	1000000011
192.156	145.689	5992.49	10	1000000005
134.933	207.926	5994.15	10	1000000008
-5.96046e-08	20.0634	5996.87	10	1000000110
-5.96046e-08	95.0447	5998.25	10	1000000112
10.6473	189.146	5997.93	10	1000000096
148.729	21.9928	5999.56	10	1000000003
108.903	156.763	5999.91	10	1000000014
133.98	191.777	5999.23	10	1000000061
213.096	199.943	5999.99	10	1000000063
25.6627	102.669	6001.61	10	1000000009
57.9451	233.173	6002.3	10	1000000098
404.407	238.325	5978.28	10	1000000016
325.777	64.4601	5983.32	10	1000000015
429.04	44.7179	5986.65	10	1000000017
453.1	92.5152	5988.04	10	1000000026
393.627	138.172	5990.73	10	1000000019
269.857	151.14	5990.17	10	1000000018
397.517	225.024	5990.98	10	1000000020
271.654	180.918	5994.74	10	1000000021
258.324	233.756	5997.26	10	1000000092
277.548	6.73992	5999.93	10	1000000023
277.093	109.033	5998.84	10	1000000024
422.562	195.893	5998.68	10	1000000022
35.9678	436.61	5975.45	10	1000000028
71.0335	453.839	5981.56	10	1000000029
5.41033	344.955	5983.47	10	1000000034
127.209	429.032	5984.79	10	1000000097
84.3495	448.84	5986.58	10	1000000031
179.325	388.504	5987.85	10	1000000036
23.1036	475.742	5987.32	10	1000000033
147.766	491.293	5988.63	10	1000000035
59.3995	462.504	5993.65	10	1000000032
70.2383	479.055	5992.43	10	1000000030
233.471	485.013	5993.41	10	1000000037
52.4967	355.54	5995.36	10	1000000076
207.823	458.597	5994.45	10	1000000041
135.41	501.644	5994.52	10	1000000040
78.87	373.902	5999.68	10	1000000039
200.708	440.919	6000.02	10	1000000104
48.2697	413.528	6001.73	10	1000000079
487.388	382.619	5977.48	10	1000000044
473.335	319.452	5980.97	10	1000000045
480.362	351.844	5980.92	10	1000000043
445.861	324.915	5984.38	10	1000000051
271.543	260.345	5986.28	10	1000000052
428.798	391.033	5987.12	10	1000000105
442.676	283.041	5987.66	10	1000000049
455.396	348.151	5989.44	10	1000000046
459.13	384.059	5989.15	10	1000000054
270.978	271.458	5990.42	10	1000000053
486.317	347.941	5991.56	10	1000000084
435.727	453.63	5991.03	10	1000000094
271.808	259.866	5992.79	10	1000000099
377	270.741	5993.43	10	1000000050
439.881	351.625	5993.25	10	1000000057
397.374	387.439	5993.28	10	1000000048
481.026	372.212	5995.81	10	1000000047
448.987	435.664	5994.31	10	1000000055
497.582	310.386	6000.63	10	1000000086
361.946	335.271	6002.04	10	1000000087
386.718	431.189	6002.15	10	1000000085
145.802	38.9787	6003.6	10	1000000012
70.5383	111.659	6004.29	10	1000000095
114.82	117.135	6003.31	10	1000000010
194.659	190.572	6002.79	10	1000000013
107.802	216.828	6003.58	10	1000000067
96.2063	50.8471	6006.22	10	1000000058
130.345	78.3699	6005.44	10	1000000106
175.05	84.0688	6005.82	10	1000000059
117.948	147.613	6005.06	10	1000000060
144.267	107.526	6007.13	10	1000000070
69.6221	130.962	6007.19	10	1000000062
59.09	186.136	6008.45	10	1000000066
30.5257	32.4663	6010.25	10	1000000065
196.953	114.131	6010.75	10	1000000068
213.924	124.567	6009.68	10	1000000069
65.3503	26.7806	6013.21	10	1000000064
242.962	157.115	6015.5	10	1000000107
251.858	251.216	6016.25	10	1000000077
56.8936	107.369	6020.27	10	1000000100
29.0323	104.069	6025.25	10	1000000071
-5.96046e-08	110.748	6025.56	10	1000000101
270.575	61.091	6005.21	10	1000000072
310.442	128.569	6006.47	10	1000000103
415.053	156.755	6005.43	10	1000000025
363.89	159.362	6011.12	10	1000000073
335.296	173.308	6011.45	10	1000000102
408.375	132.947	6018.19	10	1000000074
391.232	94.7351	6021.13	10	1000000075
211.416	348.388	6003.51	10	1000000078
43.7911	366.874	6004.12	10	1000000108
247.986	442.767	6005.16	10	1000000080
244.47	413.333	6010.89	10	1000000082
179.885	457.203	6011.15	10	1000000081
312.717	285.011	6004.01	10	1000000083
357.986	335.962	6004.51	10	1000000113
400.432	462.95	6003.3	10	1000000109
461.685	267.221	6006.64	10	1000000056
469.034	312.599	6008.15	10	1000000089
336.467	282.784	6015.44	10	1000000088
308.204	334.062	6015.06	10	1000000093
446.802	319.895	6023.85	10	1000000114
47.4724	128.321	5986.67	11	1000000004
8.03325	100.333	5990.42	11	1000000000
231.463	110.354	5989.89	11	1000000002
18.1203	226.566	5990.8	11	1000000090
33.4542	48.4319	5993.02	11	1000000007
40.1741	88.4366	5992.56	11	1000000001
1.0185	113.189	5993.14	11	1000000115
192.394	145.732	5991.81	11	1000000005
182.335	178.995	5992.33	11	1000000006
110.702	225.149	5993.41	11	1000000111
133.374	108.79	5995.63	11	1000000091
196.409	131.949	5994.88	11	1000000011
133.372	207.792	5994.85	11	1000000008
-5.96046e-08	17.9082	5997.71	11	1000000110
10.4434	187.623	5998.2	11	1000000096
147.957	20.7413	5999.22	11	1000000003
-5.96046e-08	92.1025	5999.1	11	1000000112
27.551	98.8796	6000.06	11	1000000009
132.806	190.478	6000.45	11	1000000061
214.161	196.039	6000.5	11	1000000063
116.458	116.086	6000.65	11	1000000010
111.223	157.177	6000.67	11	1000000014
197.831	186.845	6002.24	11	1000000013
404.918	236.419	5977.42	11	1000000016
326.383	64.469	5982	11	1000000015
430.876	42.8364	5986.01	11	1000000017
454.333	91.9266	5988.31	11	1000000026
270.793	153.303	5988.71	11	1000000018
394.354	137.014	5990.03	11	1000000019
398.535	223.218	5990.45	11	1000000020
272.634	178.152	5994.83	11	1000000021
273.781	7.89718	5998.15	11	1000000023
277.153	107.859	5996.8	11	1000000024
423.974	191.315	6000.06	11	1000000022
257.838	232.101	5999.1	11	1000000092
39.0664	433.817	5977.17	11	1000000028
73.2658	453.435	5981.24	11	1000000029
5.77293	342.562	5983.84	11	1000000034
127.728	429.295	5984.62	11	1000000097
40.9231	475.351	5984.31	11	1000000116
86.0951	447.648	5986.62	11	1000000031
178.404	384.214	5988.25	11	1000000036
146.831	490.368	5988.87	11	1000000035
189.507	501.324	5989.12	11	1000000038
23.7053	475.551	5989.98	11	1000000033
58.1261	463.475	5992.89	11	1000000032
235.163	482.963	5993.18	11	1000000037
54.9434	355.123	5994.25	11	1000000076
211.027	457.51	5995.18	11	1000000041
71.3593	475.828	5995.47	11	1000000030
136.212	498.952	5994.84	11	1000000040
80.2235	371.976	5998.56	11	1000000039
213.577	346.312	6002.25	11	1000000078
49.9886	412.209	6001.37	11	1000000079
202.936	441.442	6000.51	11	1000000104
488.171	380.601	5977.63	11	1000000044
483.202	351.832	5980.34	11	1000000043
470.823	315.066	5981.57	11	1000000045
447.417	325.28	5983.92	11	1000000051
270.608	259.637	5986.23	11	1000000052
444.201	282.482	5987.06	11	1000000049
431.095	387.084	5986.97	11	1000000105
457.987	346.315	5989.29	11	1000000046
457.494	386.007	5987.4	11	1000000054
272.454	269.891	5990.37	11	1000000053
488.593	345.189	5990.66	11	1000000084
441.166	348.799	5991.45	11	1000000057
437.217	451.289	5990.68	11	1000000094
272.163	257.906	5992.85	11	1000000099
378.985	268.723	5993.82	11	1000000050
398.733	388.653	5992.15	11	1000000048
449.159	433.418	5992.94	11	1000000055
484.872	373.547	5994.72	11	1000000047
366.846	335.993	5997.89	11	1000000087
498.518	307.3	6000.35	11	1000000086
357.299	337.739	5998.42	11	1000000113
388.544	431.579	6001.66	11	1000000085
145.411	37.0742	6004.03	11	1000000012
130.939	77.6946	6004.13	11	1000000106
68.6741	112.701	6004.86	11	1000000095
120.468	146.422	6003.42	11	1000000060
107.501	216.004	6003.22	11	1000000067
58.3607	231.422	6003.02	11	1000000098
99.3586	48.5142	6005.9	11	1000000058
176.536	78.6894	6005.9	11	1000000059
145.11	108.998	6005.94	11	1000000070
69.511	128.181	6008.4	11	1000000062
28.3959	31.9608	6009.36	11	1000000065
214.98	121.047	6009.82	11	1000000069
60.2801	185.131	6009.65	11	1000000066
10.9812	245.184	6009.74	11	1000000117
198.924	112.473	6011.92	11	1000000068
67.2662	25.1716	6015.97	11	1000000064
245.599	154.562	6016.42	11	1000000107
251.945	249.127	6016.82	11	1000000077
58.0052	104.97	6019.33	11	1000000100
31.6005	104.429	6024.05	11	1000000071
-5.96046e-08	109.17	6024.71	11	1000000101
271.542	58.4434	6003.44	11	1000000072
310.527	125.727	6006.07	11	1000000103
414.474	155.33	6006.38	11	1000000025
364.737	157.154	6011.24	11	1000000073
335.782	169.246	6010.73	11	1000000102
408.078	132.405	6019.04	11	1000000074
392.122	93.7422	6021.03	11	1000000075
44.9545	364.495	6003.11	11	1000000108
249.077	442.623	6003.47	11	1000000080
244.323	413.605	6009.06	11	1000000082
180.915	455.004	6010.38	11	1000000081
402.669	465.984	6002.95	11	1000000109
467.064	265.328	6005.65	11	1000000056
316.168	284.35	6005.08	11	1000000083
468.428	309.308	6007.25	11	1000000089
308.98	333.869	6014.75	11	1000000093
338.239	281.888	6016.53	11	1000000088
447.196	314.433	6017.92	11	1000000114
48.1591	127.32	5986.3	12	1000000004
231.743	110.092	5988.51	12	1000000002
8.725	99.0922	5990.5	12	1000000000
-5.96046e-08	113.644	5990.39	12	1000000115
34.7061	46.2555	5992.33	12	1000000007
42.1171	86.3742	5992.14	12	1000000001
191.229	145.287	5992.58	12	1000000005
16.8498	227.26	5992.13	12	1000000090
133.759	108.568	5995.81	12	1000000091
196.418	132.051	5995.77	12	1000000011
183.234	177.252	5994.07	12	1000000006
132.729	207.867	5995.32	12	1000000008
-5.96046e-08	15.9381	5997.68	12	1000000110
147.165	19.4992	5998.18	12	1000000003
1.45739	89.6646	5999.59	12	1000000112
115.187	115.444	5999.82	12	1000000010
112.498	156.902	6000.23	12	1000000014
13.7066	184.704	5998.97	12	1000000096
28.7368	96.02	6001.47	12	1000000009
133.197	187.996	6001.33	12	1000000061
214.418	194.301	6001.77	12	1000000063
107.93	214.902	6001.61	12	1000000067
407.175	234.821	5976.36	12	1000000016
325.392	63.3282	5982.07	12	1000000015
432.345	41.1643	5986.68	12	1000000017
456.141	94.0271	5986.29	12	1000000026
271.667	152.907	5988.77	12	1000000018
400.08	219.275	5989.15	12	1000000020
397.522	134.592	5990.09	12	1000000019
276.569	106.617	5994.77	12	1000000024
273.405	174.963	5994.74	12	1000000021
273.336	8.19799	5997.61	12	1000000023
343.523	215.265	5997.27	12	1000000027
426.395	187.438	5998.94	12	1000000022
257.287	230.459	6000.3	12	1000000092
276.311	56.651	6002.09	12	1000000072
40.0995	431.582	5977.03	12	1000000028
73.7185	452.538	5979.65	12	1000000029
7.11213	340.836	5984.87	12	1000000034
42.5933	474.033	5983.94	12	1000000116
128.88	429.366	5986.06	12	1000000097
86.2389	446.916	5985.92	12	1000000031
179.119	379.881	5988.47	12	1000000036
147.25	490.718	5989.45	12	1000000035
192.284	500.969	5988.6	12	1000000038
23.5662	474.071	5989.89	12	1000000033
57.0859	352.632	5992.92	12	1000000076
213.541	456.429	5992.98	12	1000000041
57.6089	463.006	5992.04	12	1000000032
236.687	483.063	5992.77	12	1000000037
71.0968	474.515	5994.85	12	1000000030
136.616	496.654	5994.64	12	1000000040
202.936	439.865	5997.75	12	1000000104
82.5253	368.181	5999.51	12	1000000039
51.4472	411.797	6000.19	12	1000000079
147.88	462.313	5999.8	12	1000000042
216.114	343.78	6002.69	12	1000000078
47.4018	363.578	6001.89	12	1000000108
250.137	441.377	6002.51	12	1000000080
488.219	379.043	5978.04	12	1000000044
467.832	311.599	5980.66	12	1000000045
481.544	352.401	5979.78	12	1000000043
449.851	323.109	5984.22	12	1000000051
269.454	259.554	5985.84	12	1000000052
458.341	381.672	5986.95	12	1000000054
443.651	280.524	5988.02	12	1000000049
430.333	385.04	5988.46	12	1000000105
273.906	270.4	5990.22	12	1000000053
490.89	343.695	5990.1	12	1000000084
441.394	346.955	5991.68	12	1000000057
463.315	348.641	5989.86	12	1000000046
401.856	388.488	5990.37	12	1000000048
440.004	449.672	5990.57	12	1000000094
270.576	256.699	5993.5	12	1000000099
380.518	265.751	5993.39	12	1000000050
487.766	373.633	5992.87	12	1000000047
451.218	433.086	5992.91	12	1000000055
371.443	336.052	5995.93	12	1000000087
495.459	302.775	5998.15	12	1000000086
358.396	334.637	5997.09	12	1000000113
470.882	261.862	6001.27	12	1000000056
391.887	432.434	6001.28	12	1000000085
143.172	35.6698	6004.34	12	1000000012
132.571	77.5663	6004.71	12	1000000106
66.0724	112.934	6004.41	12	1000000095
121.288	144.696	6003.18	12	1000000060
198.999	184.076	6002.74	12	1000000013
57.623	231.196	6002.87	12	1000000098
99.6104	47.7682	6006.86	12	1000000058
178.225	76.2587	6006.2	12	1000000059
145.041	108.18	6006.02	12	1000000070
28.3348	29.9332	6008.86	12	1000000065
62.7955	185.658	6008.05	12	1000000066
198.827	111.323	6010.43	12	1000000068
212.297	122.263	6011.43	12	1000000069
69.0778	126.858	6010.15	12	1000000062
11.9154	242.162	6009.98	12	1000000117
69.1751	22.5209	6017.43	12	1000000064
252.589	248.271	6017.2	12	1000000077
59.3497	104.044	6018.48	12	1000000100
30.582	102.31	6023.56	12	1000000071
-5.96046e-08	104.699	6027.24	12	1000000101
309.214	122.058	6003.94	12	1000000103
416.522	151.771	6006.83	12	1000000025
365.486	152.604	6010.73	12	1000000073
339.823	166.625	6011.21	12	1000000102
410.77	130.575	6018.74	12	1000000074
394.765	91.8458	6021.65	12	1000000075
244.455	411.312	6006.78	12	1000000082
182.423	453.878	6010.02	12	1000000081
405.481	464.885	6003.01	12	1000000109
318.344	279.739	6005.85	12	1000000083
466.999	308.528	6005.8	12	1000000089
446.859	314.114	6015.88	12	1000000114
312.228	332.415	6015.74	12	1000000093
340.551	282.721	6017.01	12	1000000088
48.516	126.127	5986.36	13	1000000004
232.76	110.258	5989.07	13	1000000002
9.16633	97.8115	5989.82	13	1000000000
-5.96046e-08	113.029	5990.46	13	1000000115
15.7796	228.459	5991.56	13	1000000090
33.0655	45.5518	5992.24	13	1000000007
42.1095	84.9521	5992.14	13	1000000001
187.869	143.138	5993.3	13	1000000005
132.951	109.459	5994.64	13	1000000091
183.793	175.48	5996	13	1000000006
131.622	207.219	5994.69	13	1000000008
107.609	226.896	5994.11	13	1000000111
164.525	235.787	5994.37	13	1000000118
-5.96046e-08	16.1776	5996.71	13	1000000110
145.282	18.482	5997.53	13	1000000003
114.755	115.693	5997.61	13	1000000010
196.454	131.93	5997.47	13	1000000011
15.6918	182.01	5997.56	13	1000000096
112.843	156.616	5999.51	13	1000000014
3.22965	87.8054	6000.77	13	1000000112
135.095	186.058	6001.3	13	1000000061
214.826	192.641	6002.14	13	1000000063
108.082	213.651	6001.83	13	1000000067
58.7011	229.981	6001.9	13	1000000098
405.503	235.065	5975.22	13	1000000016
325.586	64.2133	5981.27	13	1000000015
464.415	94.933	5984.1	13	1000000026
433.569	41.9648	5987.82	13	1000000017
270.644	154.942	5988.03	13	1000000018
400.423	217.541	5988.43	13	1000000020
402.543	132.8	5994.22	13	1000000019
273.68	173.464	5994.04	13	1000000021
272.535	10.8194	5996.59	13	1000000023
275.443	107.167	5997.03	13	1000000024
345.436	213.669	5997.05	13	1000000027
427.476	184.489	5998.85	13	1000000022
279.711	57.8821	6002.22	13	1000000072
254.333	228.817	6000.61	13	1000000092
42.1191	430.523	5976.41	13	1000000028
77.1071	450.367	5981.34	13	1000000029
131.108	428.771	5984.75	13	1000000097
46.2452	473.35	5984.32	13	1000000116
89.0306	446.769	5986.35	13	1000000031
193.789	500.881	5986.48	13	1000000038
7.35734	338.57	5987.54	13	1000000034
23.7699	472.912	5989.48	13	1000000033
147.023	490.005	5988.73	13	1000000035
59.7727	350.714	5991.44	13	1000000076
181.265	378.315	5991.14	13	1000000036
215.693	457.425	5993.5	13	1000000041
57.2735	463.759	5991.98	13	1000000032
237.76	483.791	5992.07	13	1000000037
72.9534	471.696	5995.78	13	1000000030
136.311	495.468	5994.31	13	1000000040
82.3205	367.209	5997.39	13	1000000039
48.3998	362.705	5999.86	13	1000000108
54.3807	411.89	5999.39	13	1000000079
201.247	439.873	5999.13	13	1000000104
150.012	461.672	5999.99	13	1000000042
465.936	307.193	5979.4	13	1000000045
484.45	348.438	5979.14	13	1000000043
487.248	373.998	5978.55	13	1000000044
451.781	321.689	5982.1	13	1000000051
267.95	258.992	5985.35	13	1000000052
445.827	276.394	5986.92	13	1000000049
469.526	346.431	5989.09	13	1000000046
432.114	382.455	5987.72	13	1000000105
457.302	381.67	5988.58	13	1000000054
404.32	385.151	5988.61	13	1000000048
275.533	269.391	5991.07	13	1000000053
490.768	341.961	5990.04	13	1000000084
441.911	345.704	5989.82	13	1000000057
441.158	446.621	5989.76	13	1000000094
268.604	256.55	5991.99	13	1000000099
380.458	264.028	5992.66	13	1000000050
488.248	373.86	5992.23	13	1000000047
441.047	478.194	5992.82	13	1000000119
368.678	335.739	5995.32	13	1000000087
456.364	428.275	5994.93	13	1000000055
475.473	260.693	5997.45	13	1000000056
355.013	335.818	5998.2	13	1000000113
496.361	300.261	5999.22	13	1000000086
392.981	431.537	5999.01	13	1000000085
405.715	463.883	6001.45	13	1000000109
141.243	34.8216	6003.89	13	1000000012
133.953	76.314	6004.01	13	1000000106
29.6011	94.5046	6003.32	13	1000000009
146.272	108.548	6003.41	13	1000000070
199.736	182.093	6003.21	13	1000000013
29.5317	30.0716	6006.11	13	1000000065
180.39	74.9993	6005.22	13	1000000059
65.5033	112.026	6005.7	13	1000000095
123.64	143.934	6005.78	13	1000000060
99.947	45.4986	6007.93	13	1000000058
68.7204	125.065	6008.98	13	1000000062
65.7731	185.067	6007.15	13	1000000066
13.5739	242.65	6008.32	13	1000000117
201.221	110.088	6011.66	13	1000000068
213.081	121.992	6013.39	13	1000000069
69.7142	19.425	6016.83	13	1000000064
59.5985	100.556	6019.22	13	1000000100
29.7955	101.486	6022.29	13	1000000071
-5.96046e-08	102.917	6026.65	13	1000000101
310.346	121.384	6002.99	13	1000000103
415.708	151.73	6006.54	13	1000000025
342.237	166.837	6006.35	13	1000000102
364.803	151.771	6010.14	13	1000000073
255.049	247.05	6016.6	13	1000000077
411.591	127.271	6018.23	13	1000000074
394.708	90.9338	6020.96	13	1000000075
217.375	344.918	6003.33	13	1000000078
251.673	439.632	6003.28	13	1000000080
244.172	410.731	6008.52	13	1000000082
182.44	451.9	6011.13	13	1000000081
318.182	278.491	6005.69	13	1000000083
465.906	309.368	6005.24	13	1000000089
447.859	312.649	6014.82	13	1000000114
311.588	332.099	6015.47	13	1000000093
337.117	285.759	6016.39	13	1000000088
50.7737	125.416	5987.48	14	1000000004
32.6199	46.2726	5990.86	14	1000000007
43.4716	84.4263	5991.15	14	1000000001
9.80243	97.7232	5990.16	14	1000000000
232.609	110.154	5989.72	14	1000000002
1.83458	113.237	5991.16	14	1000000115
185.767	141.291	5992.38	14	1000000005
14.2743	227.897	5992.6	14	1000000090
133.102	107.995	5995.18	14	1000000091
185.107	173.824	5995.1	14	1000000006
132.385	205.354	5994.13	14	1000000008
104.646	228.935	5994.21	14	1000000111
163.722	235.895	5994.12	14	1000000118
-5.96046e-08	15.1887	5996.75	14	1000000110
143.607	17.9724	5996.35	14	1000000003
-5.96046e-08	26.0827	5997.79	14	1000000120
112.837	115.032	5996.9	14	1000000010
196.585	130.303	5996.99	14	1000000011
4.44504	86.6806	5999.77	14	1000000112
113.094	155.094	5999.41	14	1000000014
17.5967	179.893	5998.9	14	1000000096
137.05	186.762	6000.48	14	1000000061
107.322	211.517	6000.06	14	1000000067
214.565	188.83	6001.35	14	1000000063
59.0549	227.861	6001.54	14	1000000098
404.028	233.525	5974.82	14	1000000016
470.8	93.2329	5980.19	14	1000000026
323.335	63.334	5981.66	14	1000000015
433.994	42.1547	5987.59	14	1000000017
270.668	154.79	5988.3	14	1000000018
401.919	214.024	5989.23	14	1000000020
274.537	106.498	5994.97	14	1000000024
405.774	128.816	5994.57	14	1000000019
274.12	169.435	5995.6	14	1000000021
348.118	213.49	5994.34	14	1000000027
429.168	182.054	5997.89	14	1000000022
272.318	10.8671	5999.04	14	1000000023
254.444	226.426	6000.48	14	1000000092
280.569	57.6648	6002.12	14	1000000072
310.079	117.696	6002.65	14	1000000103
43.2036	430.522	5975.87	14	1000000028
79.3788	448.38	5979.74	14	1000000029
131.397	427.053	5984.93	14	1000000097
49.7008	472.935	5983.75	14	1000000116
91.1039	446.837	5986.05	14	1000000031
194.365	500.29	5986.96	14	1000000038
146.888	489.07	5989.15	14	1000000035
8.89088	335.44	5989.78	14	1000000034
25.2421	472.291	5990.28	14	1000000033
61.1218	347.544	5991.83	14	1000000076
181.367	376.351	5991.77	14	1000000036
219.415	457.464	5992.43	14	1000000041
56.4941	464.53	5993.28	14	1000000032
73.1782	470.49	5995.33	14	1000000030
235.567	485.286	5994.81	14	1000000037
138.239	495.989	5994.94	14	1000000040
83.3244	366.399	5997.5	14	1000000039
48.4988	359.862	5999.31	14	1000000108
56.0987	411.812	5999.88	14	1000000079
200.788	439.659	5998.59	14	1000000104
151.297	459.533	5999.48	14	1000000042
253.211	440.004	6002.34	14	1000000080
487.193	344.081	5978.27	14	1000000043
486.809	367.598	5978.23	14	1000000044
466.37	304.727	5978.78	14	1000000045
456.505	320.995	5981.76	14	1000000051
457.304	380.796	5982.33	14	1000000054
433.56	378.921	5984.92	14	1000000105
266.345	259.516	5985.25	14	1000000052
443.689	274.672	5987.18	14	1000000049
443.433	345.589	5988.96	14	1000000057
380.855	261.213	5990.11	14	1000000050
277.12	268.12	5990.34	14	1000000053
493.465	340.241	5990.59	14	1000000084
474.431	342.198	5989.7	14	1000000046
490.739	375.662	5990.4	14	1000000047
406.615	383.792	5989.9	14	1000000048
266.953	256.385	5991.89	14	1000000099
366.195	334.052	5992.48	14	1000000087
444.832	446.184	5992.38	14	1000000094
442.01	474.056	5994.51	14	1000000119
477.624	258.122	5997.76	14	1000000056
498.816	298.219	5996.58	14	1000000086
353.429	337.578	5996.58	14	1000000113
457.758	427.467	5996.37	14	1000000055
395.847	431.389	5998.53	14	1000000085
465.928	308.672	6001.61	14	1000000089
29.915	29.9516	6003.86	14	1000000065
140.479	33.4833	6003.68	14	1000000012
100.765	45.2418	6004.39	14	1000000058
136.641	77.2334	6004.38	14	1000000106
29.6854	93.4642	6004.06	14	1000000009
145.609	106.666	6003.59	14	1000000070
-5.96046e-08	137.24	6003.66	14	1000000121
200.29	180.52	6003.35	14	1000000013
65.8936	111.434	6005.32	14	1000000095
71.2529	123.258	6006.06	14	1000000062
124.587	143.777	6006.85	14	1000000060
68.9143	182.982	6005.78	14	1000000066
69.2636	239.014	6006.17	14	1000000122
181.769	73.0735	6008.54	14	1000000059
16.17	242.617	6008.52	14	1000000117
205.58	108.957	6012.65	14	1000000068
249.192	149.418	6015.49	14	1000000107
69.3875	16.5767	6016.4	14	1000000064
212.311	124.124	6016.86	14	1000000069
59.0057	99.2187	6019.65	14	1000000100
31.0539	99.6453	6023.94	14	1000000071
1.73061	102.031	6027.62	14	1000000101
205.731	176.919	6032.4	14	1000000123
331.128	151.871	6004.25	14	1000000124
417.064	149.789	6006.91	14	1000000025
344.485	165.622	6005.15	14	1000000102
363.715	150.787	6008.2	14	1000000073
413.367	122.746	6017.2	14	1000000074
255.367	246.717	6016.81	14	1000000077
394.942	89.4461	6018.98	14	1000000075
216.626	341.705	6004.7	14	1000000078
245.237	406.295	6006.98	14	1000000125
245.28	410.833	6008.11	14	1000000082
182.78	452.819	6010.06	14	1000000081
408.383	464.891	6003.05	14	1000000109
316.788	276.581	6005.48	14	1000000083
451.118	312.186	6011.59	14	1000000114
334.086	286.291	6017.74	14	1000000088
313.049	331.824	6018.46	14	1000000093
32.7483	47.854	5988.56	15	1000000007
50.6276	124.001	5988.36	15	1000000004
44.2951	84.4903	5991.21	15	1000000001
11.0732	98.7391	5991.49	15	1000000000
233.121	108.988	5991.52	15	1000000002
2.41974	113.534	5991.01	15	1000000115
186.067	139.295	5991.85	15	1000000005
13.4909	227.09	5993.57	15	1000000090
-5.96046e-08	14.1485	5995.36	15	1000000110
131.059	108.511	5994.01	15	1000000091
111.83	113.801	5995.58	15	1000000010
185.313	169.746	5994.36	15	1000000006
132.476	203.794	5994.37	15	1000000008
104.742	229.264	5994.93	15	1000000111
163.507	235.302	5994.53	15	1000000118
143.219	17.4124	5996.18	15	1000000003
7.43656	84.4629	5997.56	15	1000000112
111.086	209.514	5997.5	15	1000000067
-5.96046e-08	25.7153	5998.76	15	1000000120
144.179	104.48	5999.7	15	1000000070
195.536	127.498	5999.21	15	1000000011
114.072	154.222	5998.82	15	1000000014
20.2103	178.512	6000.45	15	1000000096
140.131	186.572	5999.94	15	1000000061
30.8291	29.0677	6003.6	15	1000000065
29.8739	92.5527	6001.82	15	1000000009
213.834	183.424	6001.52	15	1000000063
61.0045	226.214	6002.48	15	1000000098
400.962	233.276	5973.41	15	1000000016
472.933	91.7792	5978.48	15	1000000026
322.496	62.9851	5982.92	15	1000000015
436.81	41.7459	5988.3	15	1000000017
270.96	152.394	5987.88	15	1000000018
404.036	210.564	5989.14	15	1000000020
348.932	213.646	5992.85	15	1000000027
275.1	106.152	5995.84	15	1000000024
410.215	125.442	5994.53	15	1000000019
274.505	166.277	5996.28	15	1000000021
432.562	179.071	5997.73	15	1000000022
271.803	9.92505	5998.74	15	1000000023
254.941	224.638	6001.47	15	1000000092
44.0223	430.233	5976.68	15	1000000028
81.3064	447.768	5979.74	15	1000000029
133.225	426.646	5984.6	15	1000000097
53.9662	472.275	5983.7	15	1000000116
91.3222	506.94	5986.89	15	1000000126
11.1055	334.787	5989.45	15	1000000034
92.2407	446.584	5987.92	15	1000000031
25.3046	471.255	5989.32	15	1000000033
146.865	489.548	5988.39	15	1000000035
195.412	501.142	5987.67	15	1000000038
62.6505	347.535	5990.82	15	1000000076
183.371	374.049	5991.21	15	1000000036
221.377	457.404	5992.05	15	1000000041
55.9848	464.377	5994.69	15	1000000032
235.022	487.624	5995.42	15	1000000037
139.412	495.721	5995.17	15	1000000040
49.3314	359.495	5997.88	15	1000000108
86.8092	364.365	5998.18	15	1000000039
73.2725	469.627	5996.76	15	1000000030
200.717	440.211	5999.47	15	1000000104
152.409	457.41	5998.76	15	1000000042
57.7886	412.622	6000.76	15	1000000079
252.885	439.456	6002.35	15	1000000080
488.714	341.542	5975.96	15	1000000043
469.153	302.806	5976.39	15	1000000045
484.904	365.896	5976.62	15	1000000044
456.921	318.136	5979.98	15	1000000051
266.467	258.938	5984.9	15	1000000052
446.015	271.272	5983.54	15	1000000049
435.359	377.956	5984.43	15	1000000105
461.187	380.171	5982.92	15	1000000054
409.712	383.12	5988.42	15	1000000048
377.965	261.306	5990.6	15	1000000050
280.753	268.609	5990.13	15	1000000053
365.223	333.429	5991.08	15	1000000087
476.992	339.142	5990.39	15	1000000046
493.106	339.223	5991.28	15	1000000084
444.625	343.382	5991.08	15	1000000057
491.323	377.106	5990.23	15	1000000047
264.527	255.028	5991.96	15	1000000099
448.554	443.824	5991.91	15	1000000094
443.265	473.545	5993.57	15	1000000119
479.759	255.091	5995.28	15	1000000056
499.343	294.278	5994.69	15	1000000086
353.494	335.167	5995.11	15	1000000113
458.041	424.354	5997.33	15	1000000055
397.695	429.658	5997.46	15	1000000085
466.9	308.02	6001.5	15	1000000089
142.185	32.6611	6004.34	15	1000000012
137.185	76.3517	6004.34	15	1000000106
67.0137	108.875	6003.66	15	1000000095
72.5022	121.244	6004.72	15	1000000062
199.185	178.516	6003.69	15	1000000013
71.2687	180.223	6003.86	15	1000000066
101.186	43.2507	6006.52	15	1000000058
-5.96046e-08	135.768	6005.36	15	1000000121
127.131	145.096	6006.06	15	1000000060
70.064	236.671	6006.3	15	1000000122
184.682	71.5124	6008.18	15	1000000059
18.4799	240.16	6009.41	15	1000000117
208.481	104.326	6011.87	15	1000000068
249.53	147.967	6012.75	15	1000000107
213.28	121.259	6017.99	15	1000000069
69.8741	15.432	6019.2	15	1000000064
59.8986	97.8836	6019.68	15	1000000100
29.9689	97.5916	6024.23	15	1000000071
5.67253	101.064	6028.71	15	1000000101
206.444	174.043	6032.4	15	1000000123
280.848	55.2188	6003.33	15	1000000072
310.35	116.223	6003.14	15	1000000103
346.102	161.248	6003.57	15	1000000102
329.2	145.638	6005.97	15	1000000124
365.002	145.875	6008.39	15	1000000073
418.422	148.195	6007.5	15	1000000025
395.657	87.8248	6017.1	15	1000000075
415.696	120.78	6017.76	15	1000000074
256.203	246.109	6016.09	15	1000000077
215.983	339.677	6003.19	15	1000000078
245.257	405.466	6006.43	15	1000000125
244.724	413.886	6007.69	15	1000000082
184.972	452.544	6009.72	15	1000000081
409.087	466.835	6003.49	15	1000000109
317.002	275.099	6005.87	15	1000000083
452.409	310.035	6010.62	15	1000000114
335.337	286.647	6017.86	15	1000000088
314.731	330.799	6018.47	15	1000000093
33.2345	47.151	5989.17	16	1000000007
50.675	124.713	5988.29	16	1000000004
44.6637	82.5487	5991.4	16	1000000001
233.827	108.726	5991.42	16	1000000002
3.09549	116.869	5990.75	16	1000000115
12.6378	98.8759	5991.92	16	1000000000
185.194	138.037	5992.17	16	1000000005
163.963	235.258	5993.51	16	1000000118
-5.96046e-08	12.5086	5995.61	16	1000000110
142.923	17.6907	5994.75	16	1000000003
111.38	113.409	5995.58	16	1000000010
184.474	168.421	5994.6	16	1000000006
133.674	202.188	5995.25	16	1000000008
13.0805	226.984	5994.43	16	1000000090
103.356	228.304	5995.02	16	1000000111
-5.96046e-08	23.8198	5998.16	16	1000000120
9.22485	84.0484	5996.47	16	1000000112
141.992	103.002	5997.47	16	1000000070
130.932	108.087	5996.29	16	1000000091
113.186	154.839	5998.61	16	1000000014
142.753	186.95	5999.76	16	1000000061
114.993	207.803	5998.88	16	1000000127
31.663	26.8126	6001.45	16	1000000065
194.834	124.483	6001.23	16	1000000011
73.9936	177.361	6001.88	16	1000000066
22.424	179.145	6001.85	16	1000000096
215.194	178.763	6002.4	16	1000000063
60.7819	223.98	6002.55	16	1000000098
397.083	232.837	5973.43	16	1000000016
475.797	88.9693	5976.67	16	1000000026
322.017	62.5661	5982.58	16	1000000015
435.855	43.2313	5988.44	16	1000000017
273.025	150.327	5988.08	16	1000000018
405.426	210.541	5991.34	16	1000000020
414.046	120.819	5993.58	16	1000000019
276.912	106.079	5994.46	16	1000000024
347.663	155.673	5998.02	16	1000000102
276.61	163.691	5996.38	16	1000000021
436.141	176.775	5997.39	16	1000000022
349.359	212.678	5996.18	16	1000000027
270.963	7.64435	5998.57	16	1000000023
255.967	224.087	6001.79	16	1000000092
44.9584	429.969	5977.03	16	1000000028
81.7932	445.016	5980.74	16	1000000029
56.2602	471.905	5983.89	16	1000000116
135.609	424.656	5985.16	16	1000000097
95.0429	443.793	5987.06	16	1000000031
93.9021	506.94	5986.48	16	1000000126
146.945	487.599	5989.5	16	1000000035
193.865	501.305	5987.81	16	1000000038
14.4104	333.108	5991.7	16	1000000034
63.8879	348.207	5990.21	16	1000000076
24.5046	469.498	5990.51	16	1000000033
185.541	372.17	5992.09	16	1000000036
224.13	457.36	5991.98	16	1000000041
235.499	487.498	5993.09	16	1000000037
57.4372	462.857	5995.41	16	1000000032
141.113	494.686	5995.77	16	1000000040
50.0215	359.703	5997.88	16	1000000108
90.0121	362.87	5997.55	16	1000000039
152.999	454.002	5998.08	16	1000000042
74.0664	469.098	5997.02	16	1000000030
60.6354	413.836	5999.98	16	1000000079
198.563	437.377	5998.57	16	1000000104
469.62	300.373	5976.11	16	1000000045
488.125	341.459	5976.49	16	1000000043
483.309	364.241	5977.13	16	1000000044
459.118	316.11	5979.52	16	1000000051
267.102	260.022	5984.88	16	1000000052
446.794	270.362	5983.7	16	1000000049
435.202	376.147	5984.02	16	1000000105
456.763	382.61	5983.47	16	1000000128
364.207	331.523	5989.18	16	1000000087
445.887	342.667	5989.39	16	1000000057
492.706	376.281	5988.14	16	1000000047
413.954	377.457	5988.34	16	1000000048
263.596	254.609	5991.07	16	1000000099
378.304	258.867	5990.99	16	1000000050
281.934	269.034	5989.68	16	1000000053
478.779	337.722	5990.22	16	1000000046
450.192	441.692	5990.6	16	1000000094
352.563	332.918	5992.07	16	1000000113
494.878	336.478	5993.51	16	1000000084
444.445	469.62	5993.69	16	1000000119
501.493	290.757	5994.51	16	1000000086
479.858	254.148	5996.54	16	1000000056
467.48	306.184	5999.63	16	1000000089
457.094	425.059	5999.99	16	1000000055
401.347	428.987	5998.58	16	1000000085
255.645	439.461	6002.57	16	1000000080
412.148	464.61	6002.17	16	1000000109
137.794	75.9579	6004.33	16	1000000106
27.9067	91.3193	6003.16	16	1000000009
148.415	101.274	6003.91	16	1000000129
67.5855	106.251	6004.51	16	1000000095
-5.96046e-08	133.98	6004.07	16	1000000121
198.296	177.58	6003.85	16	1000000013
71.3737	233.552	6004.35	16	1000000122
142.334	31.9486	6006.1	16	1000000012
100.516	41.7021	6006.33	16	1000000058
187.045	68.0385	6006.59	16	1000000059
75.8682	116.029	6005.31	16	1000000062
130.056	143.043	6006.89	16	1000000060
21.3346	237.879	6008.21	16	1000000117
208.724	101.688	6012.78	16	1000000068
251.498	149.033	6012.49	16	1000000107
72.4864	14.2989	6017.39	16	1000000064
213.024	117.687	6019.18	16	1000000069
61.5762	94.5368	6021.81	16	1000000100
28.5278	94.792	6026.51	16	1000000071
4.62192	98.9881	6027.79	16	1000000101
208.869	170.344	6029.06	16	1000000123
280.296	53.2717	6002.85	16	1000000072
310.136	113.335	6003.32	16	1000000103
328.248	141.318	6005.74	16	1000000124
366.319	141.888	6006.81	16	1000000073
418.761	145.577	6011.22	16	1000000025
258.447	246.221	6015.23	16	1000000077
395.232	84.0238	6018.76	16	1000000075
414.967	120.029	6018.36	16	1000000074
218.383	338.027	6003.84	16	1000000078
86.1242	326.084	6006.33	16	1000000130
245.167	401.816	6006.96	16	1000000125
242.693	414.06	6008.01	16	1000000082
185.68	450.745	6012.85	16	1000000081
316.487	274.775	6008.13	16	1000000083
453.112	308.736	6010.59	16	1000000114
335.377	284.155	6019.94	16	1000000088
313.216	326.524	6018.54	16	1000000093
33.6576	45.129	5989.2	17	1000000007
51.8142	123.496	5988.46	17	1000000004
44.6661	82.078	5991.62	17	1000000001
3.03094	117.033	5991.11	17	1000000115
12.5682	98.9069	5992.6	17	1000000000
232.417	108.699	5993.76	17	1000000002
186.507	136.461	5992.19	17	1000000005
185.375	167.261	5993.66	17	1000000006
142.085	16.2243	5994.43	17	1000000003
141.274	101.391	5994.72	17	1000000070
111.49	113.742	5994.32	17	1000000010
133.143	201.746	5994.25	17	1000000008
101.679	229.418	5994.82	17	1000000111
-5.96046e-08	8.67922	5996.25	17	1000000110
-5.96046e-08	23.2666	5998.21	17	1000000120
15.1849	81.418	5996.22	17	1000000112
129.325	107.472	5996.43	17	1000000091
112.504	154.746	5997.89	17	1000000014
111.782	206.566	5996.83	17	1000000127
11.8538	224.891	5996.91	17	1000000090
76.6274	175.011	5999.8	17	1000000066
221.269	177.486	6000.37	17	1000000063
145.266	186.931	5998.44	17	1000000061
31.6477	25.0738	6000.55	17	1000000065
196.504	124.003	6001.51	17	1000000011
396.371	233.332	5972.05	17	1000000016
478.113	85.4986	5975.98	17	1000000026
322.226	61.8827	5982.8	17	1000000015
436.398	42.3246	5987.52	17	1000000017
274.123	148.378	5987.81	17	1000000018
259.266	252.305	5990.98	17	1000000099
415.97	117.497	5993.7	17	1000000019
353.718	208.939	5992.63	17	1000000027
405.665	210.639	5993.13	17	1000000020
277.449	105.139	5994.56	17	1000000024
483.664	253.211	5995.65	17	1000000056
270.544	8.09316	5998.16	17	1000000023
349.973	151.745	5996.46	17	1000000102
278.527	160.761	5997.22	17	1000000021
440.913	175.069	5998.57	17	1000000022
256.21	222.944	5998.42	17	1000000092
433.042	234.943	5999.45	17	1000000131
281.18	52.32	6002.5	17	1000000072
310.902	110.222	6002.22	17	1000000103
44.5727	429.798	5976.63	17	1000000028
86.4701	446.482	5980.38	17	1000000029
58.867	471.215	5982.46	17	1000000116
138.547	422.338	5985.82	17	1000000097
95.6725	441.949	5986.91	17	1000000031
95.9165	506.94	5986.12	17	1000000126
192.955	502.782	5988.45	17	1000000038
185.842	371.182	5990.7	17	1000000036
24.9487	468.863	5990.56	17	1000000033
146.503	486.835	5989.72	17	1000000035
17.2671	335.118	5992.87	17	1000000034
65.6095	347.85	5992.13	17	1000000076
223.555	456	5992.5	17	1000000041
56.938	461.762	5993.15	17	1000000032
234.188	488.61	5992.7	17	1000000037
142.358	495.897	5995.14	17	1000000040
94.2587	361.583	5998.02	17	1000000039
198.755	438.753	5996.3	17	1000000104
153.322	452.947	5998.2	17	1000000042
75.3577	467.757	5996.29	17	1000000030
51.3315	357.743	5998.54	17	1000000108
61.7836	412.956	6000.11	17	1000000079
469.871	299.231	5978.28	17	1000000045
489.588	340.895	5976.56	17	1000000043
483.033	362.772	5977.03	17	1000000044
457.82	315.099	5979.63	17	1000000051
448.189	270.714	5982.16	17	1000000049
266.798	262.067	5984.98	17	1000000052
436.313	373.486	5983.44	17	1000000105
458.718	381.46	5983.18	17	1000000054
482.458	334.651	5986.36	17	1000000046
281.714	268.775	5988.96	17	1000000053
365.603	331.396	5987.85	17	1000000087
447.653	340.615	5987.95	17	1000000057
416.052	375.271	5988.02	17	1000000048
450.113	440.322	5989.04	17	1000000094
379.109	258.738	5991.68	17	1000000050
353.053	331.408	5991.33	17	1000000113
494.374	375.119	5990.5	17	1000000047
496.863	334.734	5992.67	17	1000000084
444.798	469.464	5993.17	17	1000000119
501.136	288.733	5994.61	17	1000000086
403.367	425.927	5995.08	17	1000000085
466.111	304.325	5999.86	17	1000000089
454.749	425.065	5998.61	17	1000000055
413.626	465.549	6000.61	17	1000000109
98.0903	39.2795	6003.8	17	1000000058
189.384	65.5078	6004.85	17	1000000059
138.72	75.9556	6004.8	17	1000000106
149.473	99.6115	6003.77	17	1000000129
66.3292	105.256	6004.54	17	1000000095
-5.96046e-08	131.895	6003.73	17	1000000121
200.252	177.648	6004.75	17	1000000013
24.2863	182.247	6003.59	17	1000000096
59.5066	222.388	6003.44	17	1000000098
71.275	231.125	6004.48	17	1000000122
28.1812	89.6046	6006.04	17	1000000009
76.2439	112.645	6006.24	17	1000000062
131.392	140.292	6005.98	17	1000000060
141.036	31.4782	6008.01	17	1000000012
20.2189	235.509	6010.16	17	1000000117
207.7	101.713	6012.35	17	1000000068
73.6285	11.3937	6017.55	17	1000000064
212.481	115.673	6016.78	17	1000000069
60.0635	94.2411	6022.1	17	1000000100
211.625	167.632	6025.19	17	1000000123
28.0279	91.765	6028.03	17	1000000071
3.99901	96.4275	6027.92	17	1000000101
329.766	137.265	6004.01	17	1000000124
367.461	140.566	6007.74	17	1000000073
253.89	149.029	6011.14	17	1000000107
416.753	142.466	6011.81	17	1000000025
258.646	243.235	6013.73	17	1000000077
395.904	82.4647	6017.16	17	1000000075
415.265	120.374	6020.11	17	1000000074
219.864	338.36	6003.38	17	1000000078
83.1272	327.715	6005.15	17	1000000130
244.365	400.035	6005.89	17	1000000125
241.254	413.858	6008.96	17	1000000082
183.256	452.207	6011.6	17	1000000081
257.401	439.549	6002.98	17	1000000080
316.447	272.629	6008.53	17	1000000083
453.312	309.198	6010.04	17	1000000114
310.204	322.131	6017.51	17	1000000093
333.395	281.559	6018.66	17	1000000088
32.7855	45.5022	5988.49	18	1000000007
-5.96046e-08	118.182	5989.2	18	1000000115
45.0508	81.3956	5991.49	18	1000000001
52.5472	123.59	5989.78	18	1000000004
166.013	232.036	5990.25	18	1000000118
-5.96046e-08	8.09465	5993.85	18	1000000110
142.565	15.4164	5993.19	18	1000000003
13.8646	98.5746	5992.58	18	1000000000
141.873	99.6602	5992.62	18	1000000070
111.179	113.189	5993.43	18	1000000010
186.551	135.306	5992.53	18	1000000005
185.055	166.843	5993.75	18	1000000006
101.337	230.967	5993.41	18	1000000111
231.158	108.487	5994.92	18	1000000002
132.171	198.819	5994.36	18	1000000008
113.701	208.994	5995.22	18	1000000127
17.7235	80.1175	5996.2	18	1000000112
130.557	108.77	5996.29	18	1000000091
113.283	154.397	5997.96	18	1000000014
225.843	175.705	5997.54	18	1000000063
145.968	186.912	5997.58	18	1000000061
107.965	202.273	5996.9	18	1000000067
11.1961	222.715	5996.36	18	1000000090
-5.96046e-08	21.9564	5999.49	18	1000000120
197.102	123.181	5999.81	18	1000000011
80.1781	175.441	6000.05	18	1000000066
31.6873	24.4007	6001.03	18	1000000065
395.503	232.028	5969.96	18	1000000016
479.78	83.0866	5975.76	18	1000000026
320.621	60.4494	5981.82	18	1000000015
436.371	39.4773	5987.52	18	1000000017
274.06	147.559	5988.28	18	1000000018
352.957	207.457	5991.43	18	1000000027
257.841	249.957	5990.21	18	1000000099
416.794	113.616	5993.78	18	1000000019
353.142	148.516	5993.88	18	1000000102
406.298	208.665	5992.86	18	1000000020
484.275	250.302	5994	18	1000000056
269.156	8.61412	5997.12	18	1000000023
278.038	103.027	5997.65	18	1000000024
278.963	155.85	6000.01	18	1000000021
442.978	173.148	6000.19	18	1000000022
433.383	231.194	5998.79	18	1000000131
282.591	52.4464	6002.7	18	1000000072
256.706	224.653	6000.68	18	1000000092
44.5557	429.925	5977.5	18	1000000028
90.2241	445.889	5980.51	18	1000000029
-5.96046e-08	455.495	5980.29	18	1000000132
60.4818	468.887	5982.52	18	1000000116
138.451	421.923	5985.31	18	1000000097
97.4347	501.572	5986.87	18	1000000126
187.589	371.299	5989.04	18	1000000036
98.1244	439.266	5988.07	18	1000000031
145.884	486.121	5988.23	18	1000000035
194.133	500.606	5988.43	18	1000000038
55.8067	461.165	5991.35	18	1000000032
24.6977	468.216	5991.12	18	1000000033
66.981	348.407	5992.43	18	1000000076
200.381	437.956	5992.34	18	1000000104
225.787	454.548	5992.15	18	1000000041
236.625	487.681	5993.06	18	1000000037
144.915	497.901	5993.76	18	1000000040
19.807	333.562	5994.52	18	1000000034
76.7189	466.739	5995.74	18	1000000030
154.012	451.27	5996.6	18	1000000042
52.3347	356.215	5998.87	18	1000000108
96.5757	357.988	5999.31	18	1000000039
61.6231	412.05	5999.56	18	1000000079
482.5	362.425	5975.59	18	1000000044
470.492	297.991	5978.22	18	1000000045
456.754	312.731	5978.47	18	1000000051
487.465	343.202	5976.77	18	1000000043
448.464	267.85	5981.84	18	1000000049
436.664	371.939	5981.95	18	1000000105
456.689	383.818	5982.42	18	1000000054
369.924	330.048	5984.75	18	1000000087
483.841	333.798	5983.42	18	1000000046
458.202	377.283	5983.21	18	1000000128
266.915	261.139	5986.63	18	1000000052
495.176	375.969	5987.11	18	1000000047
449.764	437.721	5986.33	18	1000000094
283.401	268.537	5989.24	18	1000000053
354.642	326.803	5989.08	18	1000000113
444.83	338.558	5987.35	18	1000000057
418.921	373.903	5990.09	18	1000000048
377.516	257.922	5991.73	18	1000000050
499.252	284.57	5992.84	18	1000000086
497.394	335.044	5992.31	18	1000000084
456.259	423.953	5993.14	18	1000000055
442.094	465.26	5993.05	18	1000000119
408.415	421.692	5994.42	18	1000000085
463.16	304.216	5997.54	18	1000000089
415.045	465.766	5999.98	18	1000000109
97.0002	37.7048	6003.76	18	1000000058
150.686	99.7035	6004.11	18	1000000129
-5.96046e-08	129.558	6003.65	18	1000000121
60.9303	218.574	6003.57	18	1000000098
73.281	228.689	6004.26	18	1000000122
143.341	30.9568	6006.55	18	1000000012
140.645	77.4123	6005.77	18	1000000106
64.9577	106.414	6005.66	18	1000000095
134.839	140.037	6005.38	18	1000000060
202.548	176.506	6006.61	18	1000000013
26.7749	181.082	6007	18	1000000096
190.183	63.1866	6007.22	18	1000000059
76.5097	109.72	6008.79	18	1000000062
27.5931	90.2093	6009.75	18	1000000009
21.7947	232.663	6010.4	18	1000000117
208.861	102.6	6011.9	18	1000000068
75.6647	9.62252	6017.99	18	1000000064
211.863	112.545	6016.06	18	1000000069
60.8442	93.7764	6022.27	18	1000000100
214.087	165.164	6024.92	18	1000000123
27.8427	88.5079	6028.56	18	1000000071
6.01122	95.748	6032.4	18	1000000101
309.81	105.54	6003.01	18	1000000103
327.715	136.111	6003.29	18	1000000124
369.647	139.239	6007.35	18	1000000073
255.927	149.489	6008.26	18	1000000107
261.012	241.311	6012.71	18	1000000077
397.106	79.9558	6015.61	18	1000000075
418.368	140.89	6014.15	18	1000000025
417.602	117.727	6022.6	18	1000000074
220.184	338.202	6003.29	18	1000000078
[truncated: 21,692 more rows]

## Sheet: embryo-2-Posterior
Position
Position X	Position Y	Position Z	Time	TrackID
22.4542	8.96919	5968.38	1	1000000000
83.3823	12.9591	5974.65	1	1000000001
34.0918	2.49631	5977.31	1	1000000002
11.7002	194.192	5980.14	1	1000000003
51.3026	63.1987	5981.65	1	1000000004
16.3916	204.142	5984.54	1	1000000005
40.5949	11.346	5985.71	1	1000000006
7.54693	24.9751	5986.86	1	1000000007
58.8696	114.877	5986.07	1	1000000008
17.3467	212.785	5986.3	1	1000000009
128.853	46.8938	5987.89	1	1000000010
149.684	4.86591	5989.85	1	1000000011
80.0531	70.3926	5991.22	1	1000000012
13.1827	236.284	5991.47	1	1000000013
462.794	191.413	5983.53	1	1000000014
219.914	413.222	5992.36	1	1000000015
118.439	432.503	5993.85	1	1000000016
217.731	437.392	5992.53	1	1000000017
131.182	429.085	5994.27	1	1000000018
232.625	435.82	5996.05	1	1000000019
341.806	437.124	5974.47	1	1000000020
384.426	317.88	5978.24	1	1000000021
345.992	424.06	5976.58	1	1000000022
326.138	388.947	5979.12	1	1000000023
304.202	450.474	5979.5	1	1000000024
381.696	376.081	5982.08	1	1000000025
331.142	401.748	5983.19	1	1000000026
290.53	495.665	5988.49	1	1000000027
156.649	13.4945	5997.68	1	1000000028
63.6151	50.6071	5997.33	1	1000000029
140.787	45.0377	5998.88	1	1000000030
226.047	133.364	5999	1	1000000031
201.618	36.7343	6001	1	1000000032
150.104	206.555	6001.77	1	1000000033
249.046	247.73	6003.29	1	1000000034
179.076	91.5512	6006.82	1	1000000035
169.504	90.9358	6007.11	1	1000000036
141.535	107.883	6007.94	1	1000000037
112.723	4.86276	6011.08	1	1000000038
88.4961	65.5438	6012.37	1	1000000039
184.767	164.349	6013.15	1	1000000040
169.534	66.1562	6014.77	1	1000000041
230.281	174.945	6016.93	1	1000000042
353.945	158.483	5997.17	1	1000000043
323.404	201.699	5999.77	1	1000000044
269.075	45.5925	6001.99	1	1000000045
266.555	98.508	6009.72	1	1000000046
112.39	400.259	5997.35	1	1000000047
188.488	407.795	5997.06	1	1000000048
223.764	459.207	5997.11	1	1000000049
60.5066	265.056	5999.58	1	1000000050
146.989	431.433	6000.05	1	1000000051
177.529	379.309	6002.1	1	1000000052
-5.96046e-08	269.744	6004.4	1	1000000053
22.5526	291.586	6003.21	1	1000000054
-5.96046e-08	337.853	6002.97	1	1000000055
46.3867	423.043	6004.07	1	1000000056
126.997	438.715	6003.49	1	1000000057
134.018	452.643	6004.8	1	1000000058
233.966	463.813	6003.63	1	1000000059
98.3016	318.937	6006.79	1	1000000060
106.984	375.954	6006.71	1	1000000061
43.3527	254.814	6007.21	1	1000000062
72.771	314.925	6008.85	1	1000000063
64.9916	383.977	6008.77	1	1000000064
133.047	379.304	6011.38	1	1000000065
22.535	385.281	6010.84	1	1000000066
91.7544	453.424	6010	1	1000000067
101.18	345.977	6012.1	1	1000000068
236.809	390.728	6012.93	1	1000000069
102.409	397.506	6015.61	1	1000000070
6.56723	416.047	6015.08	1	1000000071
76.6651	289.142	6017.23	1	1000000072
41.3691	369.531	6016.89	1	1000000073
-5.96046e-08	471.664	6016.22	1	1000000074
23.1635	441.229	6019.49	1	1000000075
24.178	272.165	6021.74	1	1000000076
28.8188	330.125	6021.69	1	1000000077
92.9327	381.36	6020.58	1	1000000078
7.29155	432.961	6024.11	1	1000000079
24.8883	392.286	6025.8	1	1000000080
44.7979	404.418	6025.8	1	1000000081
274.138	476.111	6000.02	1	1000000082
23.2994	8.73594	5968.5	2	1000000000
85.099	13.2632	5975.84	2	1000000001
34.6974	-5.96046e-08	5977.07	2	1000000002
11.9005	195.727	5979.94	2	1000000003
51.8593	62.6647	5981.81	2	1000000004
42.1203	11.3884	5985.22	2	1000000006
6.94001	24.6946	5985.26	2	1000000007
129.169	47.6259	5986.38	2	1000000010
59.796	115.729	5986.52	2	1000000008
15.5389	204.191	5986.1	2	1000000005
17.3253	215.794	5987.11	2	1000000009
149.575	7.34557	5990.13	2	1000000011
80.4633	71.1558	5990.97	2	1000000012
14.4326	237.61	5992.3	2	1000000013
463.965	189.362	5983.38	2	1000000014
224.101	415.031	5991.14	2	1000000015
224.145	439.039	5990.83	2	1000000017
118.419	432.166	5994.32	2	1000000016
236.424	435.85	5994.96	2	1000000019
341.962	436.41	5970.76	2	1000000020
349.333	424.302	5976.03	2	1000000022
385.07	319.547	5977.59	2	1000000021
307.431	451.018	5978.28	2	1000000024
325.214	388.162	5979.4	2	1000000023
381.951	376.809	5981.02	2	1000000025
332.844	400.444	5982.29	2	1000000026
290.681	496.359	5988.19	2	1000000027
158.784	17.0902	5997.97	2	1000000028
225.493	131.338	5997.59	2	1000000031
201.454	36.828	6000.29	2	1000000032
140.235	47.4765	5999.05	2	1000000030
64.0062	50.5513	5999.18	2	1000000029
151.642	209.707	6001.99	2	1000000033
249.584	246.848	6001.79	2	1000000034
84.0433	233.503	6003.84	2	1000000083
169.598	89.3415	6006.55	2	1000000036
180.131	93.3199	6007.92	2	1000000035
140.629	109.492	6007.94	2	1000000037
87.6458	66.1526	6011.93	2	1000000039
189.896	164.927	6013.38	2	1000000040
170.777	66.944	6014.99	2	1000000041
227.517	177.73	6015.7	2	1000000042
354.959	158.827	5996.95	2	1000000043
271.905	48.972	6002.25	2	1000000045
323.559	202.628	6000.91	2	1000000044
265.31	98.1464	6007.37	2	1000000046
113.771	399.058	5996.93	2	1000000047
188.89	407.921	5997.2	2	1000000048
132.364	429.311	5996.86	2	1000000018
225.299	462.028	5996.82	2	1000000049
62.6174	269.571	5999.85	2	1000000050
145.262	433.086	6000.19	2	1000000051
127.766	439.115	6002.1	2	1000000057
23.1814	295.438	6004.09	2	1000000054
3.12715	340.218	6004.22	2	1000000055
177.765	380.305	6002.84	2	1000000052
48.018	427.408	6004.04	2	1000000056
234.392	466.282	6004.1	2	1000000059
45.0713	255.013	6005.79	2	1000000062
4.2334	270.248	6006.11	2	1000000053
98.9852	319.472	6006.42	2	1000000060
36.1403	291.974	6007.26	2	1000000084
75.9093	318.124	6007.94	2	1000000063
109.323	376.075	6007.81	2	1000000061
135.994	451.929	6007.56	2	1000000058
99.5497	347.278	6010.3	2	1000000068
134.583	381.175	6011.26	2	1000000065
24.3164	384.498	6010.67	2	1000000066
92.607	452.233	6010.14	2	1000000067
67.1133	383.749	6011.63	2	1000000064
236.174	391.47	6011.95	2	1000000069
104.071	399.348	6015.51	2	1000000070
133.561	403.466	6015.17	2	1000000085
77.4964	291.331	6017.96	2	1000000072
43.5701	370.538	6016.39	2	1000000073
6.28135	417.808	6017.09	2	1000000071
-5.96046e-08	473.263	6017.03	2	1000000074
24.5462	444.751	6018.57	2	1000000075
23.7964	273.207	6021.48	2	1000000076
92.7765	382.019	6020.82	2	1000000078
30.2666	333.701	6022.76	2	1000000077
25.8209	392.003	6025.8	2	1000000080
42.9962	405.791	6025.8	2	1000000081
6.49187	433.777	6025.8	2	1000000079
274.424	475.441	6000.29	2	1000000082
24.8842	8.42853	5968.34	3	1000000000
35.3487	-5.96046e-08	5975.91	3	1000000002
87.437	13.1179	5976.52	3	1000000001
-5.96046e-08	17.6724	5979.69	3	1000000086
53.5432	60.8105	5982.15	3	1000000004
9.95881	200.242	5982.26	3	1000000003
129.178	46.8231	5984.28	3	1000000010
43.5115	11.5153	5986.21	3	1000000006
8.14495	23.8964	5986.41	3	1000000007
60.2338	116.105	5986.09	3	1000000008
16.6607	203.745	5986.36	3	1000000005
150.807	11.4542	5990.18	3	1000000011
82.0102	70.2281	5990.57	3	1000000012
18.7229	217.455	5989.62	3	1000000009
15.9798	240.247	5992.46	3	1000000013
464.088	187.684	5983.88	3	1000000014
356.156	158.003	5994.48	3	1000000043
225.08	441.583	5992.15	3	1000000017
227.393	417.391	5994.5	3	1000000015
116.89	433.902	5994.04	3	1000000016
237.107	435.159	5994.63	3	1000000019
227.318	462.808	5996.05	3	1000000049
342.519	437.622	5973.19	3	1000000020
353.294	424.251	5975.37	3	1000000022
308.832	452.111	5975.89	3	1000000024
382.852	321.524	5978.5	3	1000000021
327.69	386.936	5977.58	3	1000000023
335.637	399.133	5981.3	3	1000000026
380.056	377.083	5983.87	3	1000000025
291.027	497.61	5990.2	3	1000000027
226.213	134.81	5997.13	3	1000000031
164.614	20.7519	5999.1	3	1000000028
201.465	37.9549	6000.29	3	1000000032
65.7307	50.4703	5999.87	3	1000000029
139.882	48.9636	5998.77	3	1000000030
129.319	221.994	6002.66	3	1000000087
250.55	246.232	6000.7	3	1000000034
152.622	211.544	6002.92	3	1000000033
85.6654	236.185	6004.68	3	1000000083
170.536	86.5451	6006.29	3	1000000036
179.651	92.5882	6006.43	3	1000000035
139.928	108.674	6007.92	3	1000000037
112.67	4.39706	6010.73	3	1000000038
87.616	65.5691	6013.62	3	1000000039
192.894	166.662	6012.05	3	1000000040
170.844	67.4882	6015.19	3	1000000041
228.247	176.918	6016.98	3	1000000042
324.611	202.411	5999.71	3	1000000044
272.405	49.8322	6002.59	3	1000000045
264.547	97.8304	6007.09	3	1000000046
187.987	411.376	5996.52	3	1000000048
63.7407	274.688	5999.11	3	1000000050
112.118	397.728	5998.92	3	1000000047
180.699	381.512	6000.84	3	1000000052
132.165	429.539	6001.34	3	1000000018
146.491	434.794	6001.36	3	1000000051
22.5425	298.006	6004.67	3	1000000054
-5.96046e-08	318.148	6002.85	3	1000000088
129.199	439.307	6002.74	3	1000000057
48.6203	256.521	6005.32	3	1000000062
7.34577	273.035	6005.53	3	1000000053
-5.96046e-08	341.596	6005.17	3	1000000055
48.1734	428.99	6006.3	3	1000000056
99.1916	322.013	6008.52	3	1000000060
109.594	375.16	6009.14	3	1000000061
232.469	465.918	6007.69	3	1000000059
77.9842	320.678	6009.63	3	1000000063
99.2816	347.255	6010.32	3	1000000068
24.8308	385.973	6009.8	3	1000000066
69.3437	385.607	6011.31	3	1000000064
135.172	384.855	6011.08	3	1000000065
93.3226	453.057	6011.23	3	1000000067
238.251	390.262	6011.97	3	1000000069
135.885	452.623	6011.58	3	1000000058
132.615	404.305	6013.9	3	1000000085
-5.96046e-08	473.732	6015.83	3	1000000074
78.7555	292.601	6017.74	3	1000000072
47.3685	372.592	6017.21	3	1000000073
105.636	402.156	6017.63	3	1000000070
26.2707	446.236	6017.77	3	1000000075
7.88966	419.427	6018.98	3	1000000071
25.527	274.469	6021.69	3	1000000076
93.9895	383.738	6020.56	3	1000000078
30.9484	334.963	6023.66	3	1000000077
6.69402	435.343	6023.78	3	1000000079
24.4825	393.263	6025.8	3	1000000080
43.9865	407.419	6025.8	3	1000000081
271.483	473.092	6003.02	3	1000000082
24.9054	6.98422	5968.9	4	1000000000
35.4441	-5.96046e-08	5975.24	4	1000000002
88.1485	12.465	5977.31	4	1000000001
-5.96046e-08	18.8712	5978.63	4	1000000086
55.6633	58.5079	5981.8	4	1000000004
7.90945	202.458	5982.54	4	1000000003
129.113	45.5946	5984.3	4	1000000010
44.8849	10.4909	5985.32	4	1000000006
61.0384	116.487	5985.98	4	1000000008
7.63868	24.2296	5988.14	4	1000000007
17.0473	203.926	5988.07	4	1000000005
151.536	13.6676	5991.01	4	1000000011
83.9635	70.7995	5991.77	4	1000000012
20.0188	217.47	5992.47	4	1000000009
463.213	186.993	5985.1	4	1000000014
356.835	157.138	5994.11	4	1000000043
228.428	443.541	5988.83	4	1000000017
237.624	434.841	5992.92	4	1000000019
228.157	417.463	5995.21	4	1000000015
115.93	434.728	5995.75	4	1000000016
230.7	462.714	5994.67	4	1000000049
341.916	437.242	5971.31	4	1000000020
355.391	424.169	5972.76	4	1000000022
308.083	451.327	5975.41	4	1000000024
386.142	319.908	5977.59	4	1000000021
328.717	383.499	5977.26	4	1000000023
336.797	398.812	5979.44	4	1000000026
378.714	375.877	5984.16	4	1000000025
291.191	496.81	5991.28	4	1000000027
225.824	135.475	5997.23	4	1000000031
18.8866	242.279	5996.2	4	1000000013
201.127	38.2287	5999.67	4	1000000032
67.0069	50.2091	5999.63	4	1000000029
141.421	50.127	5999.17	4	1000000030
168.914	21.3084	6000.81	4	1000000028
252.096	245.385	6001.55	4	1000000034
154.674	214.358	6003.75	4	1000000033
132.6	220.762	6003.34	4	1000000087
88.2713	236.643	6004.45	4	1000000083
172.838	86.1858	6005.06	4	1000000036
180.164	93.1456	6005.7	4	1000000035
113.893	2.10171	6010.87	4	1000000038
88.7387	63.1896	6013.27	4	1000000039
197.443	168.373	6012.12	4	1000000040
172.901	67.9329	6015.2	4	1000000041
227.459	175.623	6016.69	4	1000000042
325.37	200.589	6000.03	4	1000000044
272.018	50.1821	6002.66	4	1000000045
262.962	97.36	6007.89	4	1000000046
110.15	396.771	5998.24	4	1000000047
187.316	413.535	5996.12	4	1000000048
65.8979	277.819	5999.9	4	1000000050
185.265	382.165	6000.94	4	1000000052
146.563	435.247	6001.59	4	1000000051
8.89291	274.34	6004.05	4	1000000053
-5.96046e-08	319.454	6003.19	4	1000000088
131.447	426.891	6003.32	4	1000000018
128.078	440.129	6002.99	4	1000000057
48.6012	256.945	6006.31	4	1000000062
1.66256	342.37	6005.69	4	1000000055
46.2511	431.076	6006.89	4	1000000056
233.745	466.172	6006.32	4	1000000059
38.1726	295.987	6007.87	4	1000000084
23.2878	298.843	6007.75	4	1000000054
80.8063	322.383	6007.23	4	1000000063
101.701	321.961	6007.97	4	1000000060
97.6882	349.608	6008.71	4	1000000068
24.6863	386.042	6008.91	4	1000000066
94.6139	455.242	6009.04	4	1000000067
110.377	375.319	6010.09	4	1000000061
134.954	386.507	6012.16	4	1000000065
70.1938	386.911	6011.63	4	1000000064
135.285	453.105	6012.66	4	1000000058
51.1962	373.763	6015.01	4	1000000073
238.36	390.157	6014.29	4	1000000069
132.133	404.399	6013.89	4	1000000085
3.94817	475.513	6014.09	4	1000000074
27.5587	446.598	6017.96	4	1000000075
27.2182	272.951	6020.23	4	1000000076
78.3245	293.365	6018.72	4	1000000072
105.815	403.103	6018.15	4	1000000070
95.3128	384.038	6020.34	4	1000000078
6.46035	418.183	6020.83	4	1000000071
30.0221	334.794	6022.75	4	1000000077
8.00145	435.663	6023.15	4	1000000079
25.7511	394.043	6025.8	4	1000000080
42.9548	407.325	6025.8	4	1000000081
270.538	473.006	6001.61	4	1000000082
24.9584	5.05356	5969.22	5	1000000000
-5.96046e-08	33.7674	5970	5	1000000089
35.3414	-5.96046e-08	5975.05	5	1000000002
89.0731	11.816	5977.83	5	1000000001
-5.96046e-08	18.7768	5979.78	5	1000000086
56.0901	59.264	5982.09	5	1000000004
6.54506	204.789	5982.36	5	1000000003
7.35653	23.9237	5984.63	5	1000000007
128.547	44.9638	5984.09	5	1000000010
47.3568	10.7407	5986.41	5	1000000006
60.8333	117.018	5987.71	5	1000000008
18.0837	205.475	5988.59	5	1000000005
153.045	16.2241	5991.6	5	1000000011
88.396	72.2204	5991.38	5	1000000012
19.776	218.672	5993.16	5	1000000009
463.693	187.214	5985.69	5	1000000014
357.466	157.209	5991.24	5	1000000043
230.576	444.04	5989.08	5	1000000017
237.805	434.897	5990.66	5	1000000019
10.4092	260.714	5995.33	5	1000000090
232.776	463.151	5995.67	5	1000000049
340.673	434.054	5970.13	5	1000000020
356.151	423.54	5971.95	5	1000000022
306.029	448.484	5976.23	5	1000000024
389.144	318.789	5978.16	5	1000000021
329.815	381.304	5980.08	5	1000000023
337.165	397.806	5979.66	5	1000000026
377.954	377.154	5983.94	5	1000000025
291.818	495.042	5994.82	5	1000000027
20.4655	246.274	5997	5	1000000013
200.032	37.9352	5998.79	5	1000000032
67.6467	49.6783	5999.67	5	1000000029
141.372	50.1282	6000.27	5	1000000030
225.268	134.431	5999.63	5	1000000031
171.616	21.1142	6001.7	5	1000000028
252.086	245.724	6001.18	5	1000000034
173.629	87.2623	6004.12	5	1000000036
136.384	221.191	6003.5	5	1000000087
90.8278	239.075	6004.74	5	1000000083
182.273	94.2637	6005.72	5	1000000035
140.842	110.437	6005.08	5	1000000037
155.797	218.441	6005.43	5	1000000033
116.23	-5.96046e-08	6010.04	5	1000000038
199.097	168.693	6012.43	5	1000000040
89.2546	63.6072	6014.56	5	1000000039
174.671	69.2381	6015.44	5	1000000041
227.355	173.828	6017.05	5	1000000042
326.683	199.689	6001.59	5	1000000044
271.61	49.8272	6003.58	5	1000000045
262.937	96.8452	6006.81	5	1000000046
186.391	413.515	5996.87	5	1000000048
227.774	420.662	5997.14	5	1000000015
115.242	436.113	5996.67	5	1000000016
67.7387	280.718	6000.32	5	1000000050
186.937	380.71	5999.92	5	1000000052
108.241	395.72	5998.53	5	1000000047
11.0597	274.68	6000.87	5	1000000053
-5.96046e-08	322.1	6002.22	5	1000000088
146.679	434.361	6001.17	5	1000000051
128.734	439.565	6001.83	5	1000000057
129.579	424.273	6004.11	5	1000000018
49.1456	257.802	6005.51	5	1000000062
42.0521	296.724	6006.97	5	1000000084
24.9506	301.016	6006.9	5	1000000054
79.3325	324.789	6006.7	5	1000000063
6.2747	342.414	6005.3	5	1000000055
115.531	405.548	6005.77	5	1000000091
46.065	432.555	6006.82	5	1000000056
233.267	465.632	6005.48	5	1000000059
100.966	322.8	6008.28	5	1000000060
25.2046	387.685	6008.41	5	1000000066
94.828	456.113	6008.06	5	1000000067
97.9112	346.587	6010.06	5	1000000068
138.052	452.824	6010.67	5	1000000058
111.748	376.12	6011.88	5	1000000061
72.2598	386.473	6012.25	5	1000000064
136.533	388.55	6012.64	5	1000000065
240.069	389.905	6012.82	5	1000000069
54.2539	375.518	6015.56	5	1000000073
133.018	404.32	6014.12	5	1000000085
4.28183	477.341	6014.31	5	1000000074
78.026	293.756	6017.77	5	1000000072
104.503	403.355	6017.92	5	1000000070
5.74408	418.405	6018.82	5	1000000071
28.1238	445.748	6018.23	5	1000000075
96.0234	383.962	6021.86	5	1000000078
24.5468	274.273	6022.92	5	1000000076
30.9695	334.417	6023.3	5	1000000077
8.39544	437.416	6023.23	5	1000000079
24.8581	395.328	6025.8	5	1000000080
43.0113	408.171	6025.8	5	1000000081
268.899	470.613	6002.05	5	1000000082
25.2411	4.07699	5968.73	6	1000000000
-5.96046e-08	35.3116	5968.19	6	1000000089
35.8322	-5.96046e-08	5975.91	6	1000000002
90.7997	10.7712	5978.36	6	1000000001
-5.96046e-08	20.7304	5978.74	6	1000000086
57.011	59.1484	5981.63	6	1000000004
5.8845	209.088	5982.17	6	1000000003
8.27636	24.3021	5983.57	6	1000000007
127.657	44.9577	5984.42	6	1000000010
48.9131	11.9999	5985.23	6	1000000006
62.0947	116.763	5988.1	6	1000000008
19.0934	206.282	5989.58	6	1000000005
89.9593	72.1324	5992.61	6	1000000012
155.678	19.4747	5994.07	6	1000000011
20.355	220.992	5995.15	6	1000000009
463.276	184.796	5984.65	6	1000000014
355.378	155.911	5992.34	6	1000000043
238.652	435.961	5989.43	6	1000000019
230.559	445.764	5989.69	6	1000000017
234.711	464.333	5993.35	6	1000000049
358.912	425.353	5971.16	6	1000000022
340.256	434.397	5970.77	6	1000000020
307.253	445.576	5974.98	6	1000000024
389.98	320.57	5979.24	6	1000000021
375.249	374.372	5982.5	6	1000000025
332.483	382.883	5981.23	6	1000000023
339.484	398.262	5980.82	6	1000000026
292.425	492.478	5995.14	6	1000000027
67.4635	50.6494	5996.96	6	1000000029
198.32	37.213	5999.75	6	1000000032
225.421	135.034	5999.75	6	1000000031
22.2194	248.385	5999.19	6	1000000013
143.494	52.306	6001.33	6	1000000030
251.716	245.003	6001.29	6	1000000034
173.819	22.747	6003.28	6	1000000028
174.605	89.0227	6004.7	6	1000000036
140.715	112.022	6004.51	6	1000000037
157.451	220.017	6004.58	6	1000000033
135.341	221.966	6003.83	6	1000000087
180.881	97.0472	6005.58	6	1000000035
91.9993	241.771	6006.07	6	1000000083
118.154	-5.96046e-08	6012.51	6	1000000038
201.994	168.589	6012.32	6	1000000040
90.8909	65.4794	6014.77	6	1000000039
174.955	70.0183	6017.12	6	1000000041
225.869	174.008	6016.36	6	1000000042
327.731	200.97	5999.6	6	1000000044
269.664	51.4715	6004.2	6	1000000045
262.545	97.8434	6007.44	6	1000000046
11.136	265.821	5997.85	6	1000000090
108.132	395.997	5996.84	6	1000000047
185.551	416.328	5998.02	6	1000000048
226.892	421.449	5997.64	6	1000000015
118.686	435.482	5997.72	6	1000000016
187.225	382.081	5998.85	6	1000000052
11.6315	277.014	6002.35	6	1000000053
69.7905	283.042	6001.36	6	1000000050
-5.96046e-08	325.339	6002.59	6	1000000088
147.704	435.446	6001.43	6	1000000051
131.19	441.457	6001.82	6	1000000057
8.38865	345.971	6004.06	6	1000000055
116.769	404.752	6003.92	6	1000000091
130.975	424.354	6004.18	6	1000000018
45.6926	298.798	6005.45	6	1000000084
81.2105	324.188	6006.49	6	1000000063
49.6306	259.362	6007.69	6	1000000062
26.1887	303.493	6007.68	6	1000000054
100.88	323.1	6008.65	6	1000000060
26.3585	389.895	6009.08	6	1000000066
46.4546	436.156	6007.89	6	1000000056
141.774	453.329	6008.34	6	1000000058
95.4994	459.52	6007.68	6	1000000067
232.586	465.7	6008.41	6	1000000059
95.6706	347.005	6011.57	6	1000000068
113.355	375.792	6012.85	6	1000000061
75.0428	388.738	6012.6	6	1000000064
137.89	392.932	6012.46	6	1000000065
134.884	406.238	6012.8	6	1000000085
243.278	393.535	6015.33	6	1000000069
5.39853	481.665	6014.57	6	1000000074
57.7399	377.111	6016.83	6	1000000073
77.469	296.929	6018.53	6	1000000072
107.76	406.077	6019.37	6	1000000070
30.6974	451.253	6018.4	6	1000000075
23.8227	276.094	6022.49	6	1000000076
9.4284	438.737	6024.11	6	1000000079
32.9581	334.986	6025.8	6	1000000077
97.1085	383.857	6025.8	6	1000000078
24.1971	397.212	6025.8	6	1000000080
42.9517	411.491	6025.8	6	1000000081
266.098	472.962	6001.94	6	1000000082
25.2063	4.31836	5968.48	7	1000000000
-5.96046e-08	35.7444	5971.66	7	1000000089
35.8821	-5.96046e-08	5977.17	7	1000000002
90.8416	10.1223	5978.39	7	1000000001
-5.96046e-08	22.0234	5977.83	7	1000000086
8.46502	25.3625	5981.17	7	1000000007
56.8222	58.432	5982.69	7	1000000004
5.29476	212.081	5981.64	7	1000000003
49.7203	12.2201	5983.89	7	1000000006
93.7458	19.7705	5986.22	7	1000000092
125.719	45.0989	5985.9	7	1000000010
62.5283	117.167	5988.43	7	1000000008
20.1534	206.132	5989.16	7	1000000005
92.7081	71.9545	5990.97	7	1000000012
156.821	19.8059	5995.51	7	1000000011
20.5324	220.78	5995.35	7	1000000009
465.106	187.201	5984.63	7	1000000014
355.169	156.204	5990.61	7	1000000043
238.322	436.998	5987.87	7	1000000019
232.54	447.462	5988.21	7	1000000017
234.866	464.434	5993.08	7	1000000049
226.254	425.23	5994.9	7	1000000015
122.875	434.178	5995.54	7	1000000016
341.108	431.185	5969.43	7	1000000020
357.829	425.318	5972.53	7	1000000022
391.676	318.671	5975.97	7	1000000021
312.312	443.296	5975.36	7	1000000024
334.028	381.715	5977.75	7	1000000023
375.123	372.468	5980.23	7	1000000025
342.994	397.752	5980.77	7	1000000026
68.1636	48.7613	5997.73	7	1000000029
197.332	36.0638	5999.68	7	1000000032
144.869	53.8359	6000.02	7	1000000030
226.656	136.93	6000.32	7	1000000031
141.081	113.04	6002.62	7	1000000037
22.1276	250.033	6000.89	7	1000000013
175.216	23.0918	6004.13	7	1000000028
173.493	91.924	6004.35	7	1000000036
138.749	221.505	6003.57	7	1000000087
251.84	246.536	6002.72	7	1000000034
180.474	97.7332	6005.94	7	1000000035
158.294	220.817	6005.63	7	1000000033
94.4635	244.861	6005.85	7	1000000083
121.926	3.63528	6011.48	7	1000000038
203.851	167.862	6012.12	7	1000000040
177.325	71.4498	6015.44	7	1000000041
227.002	173.817	6015.41	7	1000000042
90.3147	67.8588	6016.29	7	1000000039
226.79	178.157	6017.89	7	1000000093
90.0153	250.093	6021.02	7	1000000094
330.097	200.833	5998.36	7	1000000044
270.246	51.7279	6003.54	7	1000000045
263.643	99.0228	6006.79	7	1000000046
107.395	396.509	5996.17	7	1000000047
186.915	419.331	5997.29	7	1000000048
189.304	384.064	5999.03	7	1000000052
131.391	443.325	5999.23	7	1000000057
12.2176	269.006	6000.63	7	1000000090
148.54	437.776	6000.58	7	1000000051
142.876	453.941	6001.95	7	1000000058
13.7087	279.704	6003.74	7	1000000053
71.5687	284.69	6002.93	7	1000000050
-5.96046e-08	326.024	6004.72	7	1000000088
9.7203	347.375	6003.58	7	1000000055
117.239	404.549	6003.6	7	1000000091
134.929	425.277	6004.74	7	1000000018
97.1491	462.567	6004.59	7	1000000067
51.441	259.677	6007.09	7	1000000062
47.5291	302.186	6005.04	7	1000000084
80.6441	326.982	6008.21	7	1000000063
46.9001	439.142	6008.11	7	1000000056
230.398	465.539	6008.44	7	1000000059
25.8086	307.419	6009.44	7	1000000054
102.224	326.053	6009.61	7	1000000060
27.8944	392.074	6009.77	7	1000000066
95.2713	348.212	6011.83	7	1000000068
113.751	377.368	6012.58	7	1000000061
139.925	394.849	6013.14	7	1000000065
135.604	408.614	6012.89	7	1000000085
74.175	388.154	6014.23	7	1000000064
6.24868	482.393	6014.88	7	1000000074
58.692	379.257	6016.41	7	1000000073
242.505	394.231	6016.93	7	1000000069
31.8738	455.321	6016.66	7	1000000075
77.5944	298.393	6019.19	7	1000000072
26.3488	276.871	6022.28	7	1000000076
109.921	409.578	6020.52	7	1000000070
3.72042	418.176	6020.37	7	1000000071
42.1934	412.628	6022.63	7	1000000081
8.95217	440.487	6024.29	7	1000000079
31.9138	336.016	6025.8	7	1000000077
101.489	383.577	6025.8	7	1000000078
24.714	397.488	6025.8	7	1000000080
292.038	492.031	5998.94	7	1000000027
262.44	474.762	6001.06	7	1000000082
26.4246	4.19612	5968.34	8	1000000000
-5.96046e-08	36.1228	5973.23	8	1000000089
37.5757	-5.96046e-08	5976.28	8	1000000002
91.2327	10.843	5978.39	8	1000000001
-5.96046e-08	20.2114	5978.4	8	1000000086
8.50117	24.7047	5982.1	8	1000000007
56.7718	57.1859	5981.87	8	1000000004
3.4509	215.632	5982.81	8	1000000003
51.8447	12.52	5984.42	8	1000000006
93.7929	20.706	5986.46	8	1000000092
124.232	45.0818	5987.16	8	1000000010
63.7712	117.998	5988.66	8	1000000008
93.0675	71.8157	5990.09	8	1000000012
20.9544	207.059	5990.75	8	1000000005
466.737	187.378	5983.39	8	1000000014
355.87	157.42	5988.87	8	1000000043
238.347	437.644	5987.99	8	1000000019
234.006	451.307	5988.85	8	1000000017
233.814	464.836	5992.8	8	1000000049
107.161	397.392	5995.64	8	1000000047
227.645	427.823	5994.39	8	1000000015
123.463	436.526	5995.33	8	1000000016
359.179	422.579	5969.94	8	1000000022
344.418	429.835	5970.62	8	1000000020
396.126	315.366	5973.19	8	1000000021
315.851	443.554	5973.9	8	1000000024
378.505	371.189	5977.45	8	1000000025
334.676	381.734	5977.62	8	1000000023
346.68	396.217	5979.22	8	1000000026
158.855	20.517	5996.65	8	1000000011
69.1741	48.7945	5997.73	8	1000000029
22.5588	222.781	5996.64	8	1000000009
196.909	35.3175	5999.78	8	1000000032
147.939	55.4116	5999.42	8	1000000030
140.384	113.68	6001.86	8	1000000037
227.341	136.932	6001.04	8	1000000031
252.557	247.434	6001.11	8	1000000034
-5.96046e-08	249.081	6000.85	8	1000000095
24.1793	250.767	6001.11	8	1000000013
161.302	221.556	6004.63	8	1000000033
139.762	224.014	6003.97	8	1000000087
178.852	22.1492	6004.95	8	1000000028
172.623	94.0762	6005.43	8	1000000036
180.636	97.2393	6006.15	8	1000000035
94.8983	247.903	6006.12	8	1000000083
124.902	3.57961	6010.96	8	1000000038
205.355	168.402	6012.03	8	1000000040
178.275	71.0493	6015.01	8	1000000041
91.3201	67.1567	6016.32	8	1000000039
225.119	179.043	6017.58	8	1000000093
227.488	171.501	6018.58	8	1000000042
91.2528	250.413	6021.66	8	1000000094
335.07	201.538	5996.26	8	1000000044
270.755	50.447	6002.35	8	1000000045
263.63	100.163	6007.83	8	1000000046
189.652	388.851	5999.4	8	1000000052
187.139	422.755	5998.66	8	1000000048
129.318	446.607	5999.27	8	1000000057
12.9952	270.581	6000.67	8	1000000090
15.4257	280.872	6002.56	8	1000000053
147.314	440.062	6001.29	8	1000000051
[truncated: 12,073 more rows]

## Sheet: embryo-3-Anterior
Position
[truncated: 24,315 more rows]

## Sheet: embryo-3-Middle
Position
[truncated: 21,942 more rows]

## Sheet: embryo-3-Posterior
Position
[truncated: 17,614 more rows]

[truncated: 9 more sheets: embryo-4-Anterior, embryo-4-Middle, embryo-4-Posterior, embryo-5-Anterior, embryo-5-Middle, embryo-5-Posterior, embryo-6-Anterior, embryo-6-Middle, embryo-6-Posterior]
