# Supplementary material for: Migrating mesoderm cells self-organize into a dynamic meshwork structure during chick gastrulation
Source: eLife. 2025 Aug 21;14:e84749. doi: 10.7554/eLife.84749 (PMC12578438; doi:10.7554/eLife.84749)
Supplement: Figure 2—source data 1. [file elife-84749-fig2-data1.xlsx]

## Sheet: hole_size
	upper	middle	lower
0	28.416	10.368	11.328
1	16.512	13.44	13.632
2	12.288	24.192	13.824
3	22.656	10.944	11.328
4	23.424	13.056	10.944
5	10.368	22.08	12.48
6	11.136	20.16	11.712
7	10.944	14.592	12.288
8	11.712	19.968	12.864
9	19.392	10.176	12.672
10	24.384	10.368	13.248
11	16.704	13.44	12.48
12	16.704		12.288
13	22.656		12.48
14			12.48
15			12.864

## Sheet: median
		time	median
0	0	upper	16.7
1	1	middle	13.4
2	2	lower	12.5
