# Supplementary material for: Migrating mesoderm cells self-organize into a dynamic meshwork structure during chick gastrulation
Source: eLife. 2025 Aug 21;14:e84749. doi: 10.7554/eLife.84749 (PMC12578438; doi:10.7554/eLife.84749)
Supplement: Figure 3—source data 1. [file elife-84749-fig3-data1.xlsx]

## Sheet: hole_size
	0	4	8	12	16	20	24
0	31.46	22	20.02	14.3	16.72	17.16	19.14
1	15.4	11	18.7	13.64	15.84	16.28	16.5
2	14.3	12.98	16.28	13.2	13.64	13.86	16.28
3	10.34	11.88	16.72	13.42	10.56	16.72	15.18
4	12.1	12.1	14.3	12.98	11.66	13.2	15.18
5		10.34	12.98	12.1	10.34	12.32	14.08
6		10.78	14.96	10.78	11.22	11.22	13.42
7			12.1	10.34	11	12.1	13.2
8			12.1	10.56		13.2	13.64
9			11	11.22		11.66	11.66
10			10.78	10.34		11.66	10.34
11						10.78	10.12
