# Supplementary material for: Migrating mesoderm cells self-organize into a dynamic meshwork structure during chick gastrulation
Source: eLife. 2025 Aug 21;14:e84749. doi: 10.7554/eLife.84749 (PMC12578438; doi:10.7554/eLife.84749)
Supplement: Figure 4—source data 1. [file elife-84749-fig4-data1.xlsx]

## Sheet: FrontPage
	Supplemental Information for: Migrating mesoderm cells self-organize into a dynamic meshwork structure during chick gastrulation Yukiko Nakaya, Mitsusuke Tarama, Sohei Tasaki, Ayako Isomura, Tatsuo Shibata Laboratory for Physical Biology, RIKEN Center for Biosystems Dynamics Research, Kobe 650-0047, Japan. Trajectories of mesoderm cell used for Fig. 4 and its figure supplement 1
	Trajectory data of five embryos at control and N-Cad-M sides used in Fig. 4 and Supplementary Fig. S4.
		Sheet name		Embryo ID	Position	Unit	time step (min.)
		NCadM-1-ControlSide		1	Control	µm	0.667
		NCadM-1-NcadMSide		1	N-Cad-M	µm	0.667
		NCadM-2-ControlSide		2	Control	µm	0.667
		NCadM-2-NcadMSide		2	N-Cad-M	µm	0.667
		NCadM-3-ControlSide		3	Control	µm	0.667
		NCadM-3-NcadMSide		3	N-Cad-M	µm	0.667
		NCadM-4-ControlSide		4	Control	µm	1
		NCadM-4-NcadMSide		4	N-Cad-M	µm	1
		NCadM-5-ControlSide		5	Control	µm	1
		NCadM-5-NcadMSide		5	N-Cad-M	µm	1

## Sheet: NCadM-1-ControlSide
Position
Position X	Position Y	Position Z	Time	TrackID
64.8311	51.4469	14.1686	1	1000000000
75.9656	77.196	18.724	1	1000000001
45.6796	88.8444	19.2005	1	1000000002
52.1176	96.4343	18.076	1	1000000003
104.725	93.4548	11.208	1	1000000004
169.782	33.8917	12.7556	1	1000000005
170.296	63.4524	12.2916	1	1000000006
179.277	100.303	12.9262	1	1000000007
143.264	95.0616	15.0412	1	1000000008
170.389	100.315	14.7521	1	1000000009
140.389	39.6374	16.1032	1	1000000010
188.163	88.4319	17.7093	1	1000000011
142.127	58.88	19.6004	1	1000000012
109.131	65.5688	21.3334	1	1000000013
119.557	77.0168	28.0775	1	1000000014
0.397748	158.942	6.96158	1	1000000015
66.726	178.606	9.10997	1	1000000016
96.3747	192.521	14.8747	1	1000000017
90.2551	108.94	19.1487	1	1000000018
40.7813	127.033	19.5436	1	1000000019
42.7893	132.858	29.3138	1	1000000020
73.1142	187.613	29.0179	1	1000000021
168.46	121.213	9.14091	1	1000000022
121.143	171.347	8.57231	1	1000000023
147.014	129.322	11.6812	1	1000000024
187.458	131.233	13.4748	1	1000000025
174.562	137.967	15.256	1	1000000026
107.145	159.693	16.6198	1	1000000027
133.047	187.635	16.1256	1	1000000028
110.144	190.566	17.5529	1	1000000029
172.004	119.181	18.2546	1	1000000030
135.262	144.611	18.0655	1	1000000031
178.731	154.838	20.9927	1	1000000032
126.628	177.653	21.9879	1	1000000033
152.103	126.453	28.2344	1	1000000034
185.831	124.591	30.4623	1	1000000035
213.078	154.124	11.3983	1	1000000036
247.761	144.284	12.7387	1	1000000037
221.242	105.116	16.4871	1	1000000038
209.454	136.931	20.961	1	1000000039
87.5791	231.199	4.28408	1	1000000040
50.3055	225.179	7.71251	1	1000000041
31.4862	258.138	7.0879	1	1000000042
76.2714	203.936	10.7092	1	1000000043
65.469	229.246	12.5624	1	1000000044
68.7159	252.123	16.3209	1	1000000045
95.969	220.035	19.999	1	1000000046
76.4493	255.434	26.8165	1	1000000047
139.741	203.705	8.81042	1	1000000048
174.343	207.891	9.34804	1	1000000049
130.775	247.014	10.4181	1	1000000050
137.092	258.138	25.8909	1	1000000051
165.595	209.692	27.6758	1	1000000052
131.8	99.8125	37.4386	1	1000000053
101.036	203.568	45	1	1000000054
136.005	154.726	33.5376	1	1000000055
125.964	166.401	34.4093	1	1000000056
157.292	194.916	37.6125	1	1000000057
153.783	139.419	41.365	1	1000000058
143.976	171.987	40.3888	1	1000000059
147.981	183.393	43.6964	1	1000000060
35.9417	241.238	37.2318	1	1000000061
108.39	212.045	45	1	1000000062
63.9149	50.0614	12.514	2	1000000000
52.754	95.5347	17.3598	2	1000000003
75.1909	76.4046	18.4685	2	1000000001
47.2076	87.705	18.9314	2	1000000002
170.94	31.6061	11.6796	2	1000000005
104.88	92.7149	10.9249	2	1000000004
172.024	61.169	12.3219	2	1000000006
178.47	97.809	12.7599	2	1000000007
140.492	93.2875	14.7367	2	1000000008
170.627	97.9007	14.5103	2	1000000009
141.208	38.3886	16.6779	2	1000000010
187.385	85.8773	17.5816	2	1000000011
144.255	56.7856	19.7669	2	1000000012
110.823	63.1369	21.3963	2	1000000013
120.821	75.6498	27.8915	2	1000000014
0.397748	157.732	6.14731	2	1000000015
67.8013	178.532	7.24325	2	1000000016
77.6311	202.453	11.8159	2	1000000043
98.0954	190.923	14.4895	2	1000000017
91.6632	108.086	18.0193	2	1000000018
43.6033	126.211	18.6401	2	1000000019
76.7053	187.285	27.521	2	1000000021
42.7688	132.494	28.8263	2	1000000020
170.028	120.725	8.99598	2	1000000022
121.515	172.295	8.19517	2	1000000023
141.791	202.139	8.47668	2	1000000048
188.668	130.036	13.0317	2	1000000025
148.338	130.566	12.6689	2	1000000024
175.716	136.545	14.4545	2	1000000026
134.966	184.882	14.6788	2	1000000028
173.253	116.544	17.3038	2	1000000030
135.594	143.707	17.7884	2	1000000031
107.779	157.168	16.7531	2	1000000027
111.577	191.013	16.604	2	1000000029
127.454	175.545	21.3506	2	1000000033
180.181	150.887	22.5846	2	1000000032
152.486	124.755	27.8299	2	1000000034
186.481	122.889	28.6844	2	1000000035
247.771	143.211	11.632	2	1000000037
213.166	152.067	10.7276	2	1000000036
222.832	103.119	17.3795	2	1000000038
212.759	135.902	20.1289	2	1000000039
86.9128	229.519	3.8235	2	1000000040
48.2762	224.498	6.89369	2	1000000041
33.3352	258.138	7.14323	2	1000000042
65.4864	227.87	11.6488	2	1000000044
70.5546	250.635	16.8893	2	1000000045
98.0117	218.302	19.325	2	1000000046
77.4934	253.749	27.5715	2	1000000047
173.812	206.495	9.14527	2	1000000049
134.074	243.704	10.1934	2	1000000050
178.775	211.825	12.5513	2	1000000063
139.821	258.138	25.621	2	1000000051
168.472	207.388	26.5197	2	1000000052
132.652	99.1174	35.6674	2	1000000053
101.43	202.599	45	2	1000000054
138.607	152.706	32.1464	2	1000000055
130.497	164.549	33.4388	2	1000000056
155.724	192.239	33.5635	2	1000000057
180.196	120.303	34.5395	2	1000000064
155.98	137.137	41.1002	2	1000000058
145.058	170.494	40.4569	2	1000000059
148.151	181.3	45	2	1000000060
37.3528	240.457	36.838	2	1000000061
109.879	209.641	45	2	1000000062
64.8219	49.1603	12.727	3	1000000000
53.637	94.4897	17.1639	3	1000000003
75.6541	75.1039	18.2795	3	1000000001
48.566	85.4152	18.4374	3	1000000002
174.637	29.0482	10.8135	3	1000000005
172.459	59.7668	11.7058	3	1000000006
105.061	91.7379	11.3384	3	1000000004
178.746	96.6872	12.245	3	1000000007
138.003	92.1066	15.3483	3	1000000008
170.829	95.4883	14.3003	3	1000000009
140.16	36.2301	16.2508	3	1000000010
186.959	84.0072	16.7096	3	1000000011
144.323	55.4436	19.0833	3	1000000012
111.284	60.7651	21.2666	3	1000000013
119.554	74.261	28.3077	3	1000000014
224.895	101.756	17.7635	3	1000000038
1.74761	156.765	5.41653	3	1000000015
69.2385	176.992	6.70191	3	1000000016
77.4381	201.487	11.7548	3	1000000043
98.9242	189.81	14.8905	3	1000000017
92.4601	107.073	17.6843	3	1000000018
46.0098	124.856	18.2674	3	1000000019
79.6304	186.509	27.7265	3	1000000021
41.8675	131.664	29.9884	3	1000000020
123.127	172.29	7.42413	3	1000000023
170.884	119.663	9.23475	3	1000000022
143.404	200.001	8.5836	3	1000000048
148.623	129.238	13.007	3	1000000024
188.692	128.908	13.5787	3	1000000025
138.102	182.48	12.7057	3	1000000028
175.811	135.364	14.673	3	1000000026
174.067	113.556	17.2106	3	1000000030
136.456	142.47	16.9309	3	1000000031
106.254	156.045	16.3139	3	1000000027
112.217	190.533	16.7098	3	1000000029
127.84	173.824	21.4108	3	1000000033
181.452	144.547	25.9707	3	1000000032
153.016	123.905	26.4911	3	1000000034
189.135	122.781	28.8419	3	1000000035
139.962	150.519	29.9507	3	1000000055
156.044	189.439	31.3549	3	1000000057
247.407	141.343	11.1415	3	1000000037
213.692	150.414	10.219	3	1000000036
217.212	132.549	20.0583	3	1000000039
87.4354	228.399	3.08373	3	1000000040
48.1224	224.362	6.81653	3	1000000041
35.9059	257.301	6.67334	3	1000000042
66.7128	226.93	10.6875	3	1000000044
71.8096	249.387	16.7648	3	1000000045
98.5034	216.616	19.6	3	1000000046
79.1361	251.766	28.0058	3	1000000047
175.047	205.77	8.69525	3	1000000049
137.473	239.785	9.24459	3	1000000050
179.396	212.171	12.4344	3	1000000063
142.08	258.138	23.4161	3	1000000051
172.064	205.827	25.5972	3	1000000052
117.855	258.138	26.7422	3	1000000065
133.305	97.8187	34.0387	3	1000000053
52.9478	135.691	36.8102	3	1000000066
179.044	117.352	34.7695	3	1000000064
133.004	161.744	34.5842	3	1000000056
157.893	135.3	40.6416	3	1000000058
145.859	169.787	40.4063	3	1000000059
149.303	180.102	45	3	1000000060
102.839	203.498	45	3	1000000054
38.4976	239.163	37.0429	3	1000000061
112.366	207.526	45	3	1000000062
64.7317	48.3466	12.3063	4	1000000000
54.8692	92.1694	17.4981	4	1000000003
75.2052	72.8284	18.2164	4	1000000001
48.1124	83.1726	18.3814	4	1000000002
177.037	29.5491	9.77366	4	1000000005
102.959	90.1121	9.53818	4	1000000004
173.544	59.6504	11.446	4	1000000006
178.891	94.933	11.7935	4	1000000007
139.766	36.1828	14.5056	4	1000000010
135.789	92.0228	15.3396	4	1000000008
170.569	93.9167	14.6883	4	1000000009
143.281	54.1407	17.9022	4	1000000012
187.32	82.3552	17.5212	4	1000000011
111.573	58.6143	20.8679	4	1000000013
119.71	72.3356	28.4787	4	1000000014
133.252	96.8804	31.3055	4	1000000053
224.858	99.8377	17.6691	4	1000000038
3.57677	155.519	4.92976	4	1000000015
69.3825	176.643	5.66956	4	1000000016
99.0145	188.87	14.6194	4	1000000017
93.466	105.07	17.3077	4	1000000018
46.4009	123.34	18.2759	4	1000000019
81.3581	186.315	27.7212	4	1000000021
41.7971	130.142	30.3435	4	1000000020
123.047	172.686	6.72152	4	1000000023
144.938	199.061	8.38245	4	1000000048
172.86	118.514	10.3167	4	1000000022
139.14	181.174	11.8656	4	1000000028
148.738	128.722	13.1826	4	1000000024
187.323	128.29	13.6587	4	1000000025
175.525	134.978	13.9195	4	1000000026
104.808	156.542	15.5426	4	1000000027
175.551	112.066	16.8413	4	1000000030
135.364	141.312	16.8197	4	1000000031
112.594	190.023	16.7468	4	1000000029
127.588	173.413	21.1986	4	1000000033
151.95	122.645	25.7514	4	1000000034
184.118	141.072	27.4352	4	1000000032
140.349	149.123	27.9424	4	1000000055
156.759	185.817	29.2594	4	1000000057
188.528	121.283	30.0539	4	1000000035
247.199	140.224	11.153	4	1000000037
212.903	149.917	10.0683	4	1000000036
218.974	130.532	19.5009	4	1000000039
86.91	227.675	2.21586	4	1000000040
36.3921	255.457	5.95097	4	1000000042
48.1171	224.077	6.17337	4	1000000041
67.2142	225.826	9.64558	4	1000000044
79.9118	204.097	10.9347	4	1000000043
71.5747	248.055	15.3028	4	1000000045
98.6805	215.84	20.3741	4	1000000046
79.7051	251.571	27.4436	4	1000000047
175.575	205.13	7.85526	4	1000000049
138.878	238.197	8.59445	4	1000000050
179.706	214.475	10.9603	4	1000000063
140.471	258.138	22.6219	4	1000000051
175.926	203.802	24.8637	4	1000000052
118.481	258.138	25.4661	4	1000000065
53.3083	133.903	33.7634	4	1000000066
178.481	114.357	35.5784	4	1000000064
133.512	159.983	35.3085	4	1000000056
158.854	133.884	39.6394	4	1000000058
146.137	168.408	39.8371	4	1000000059
149.706	178.524	42.9767	4	1000000060
102.808	203.083	45	4	1000000054
38.2678	237.156	35.5645	4	1000000061
113.201	206.472	45	4	1000000062
65.0319	48.0883	12.3779	5	1000000000
75.8351	71.0199	17.9692	5	1000000001
56.4799	90.4681	17.6604	5	1000000003
48.2708	82.237	18.2249	5	1000000002
176.342	29.0977	9.81557	5	1000000005
102.618	89.7389	9.08347	5	1000000004
174.725	59.132	11.2944	5	1000000006
179.894	94.4631	11.567	5	1000000007
140.687	36.4303	13.0207	5	1000000010
132.768	90.4308	15.0528	5	1000000008
170.538	92.4215	14.8724	5	1000000009
142.817	53.553	17.0576	5	1000000012
187.183	82.333	18.1256	5	1000000011
113.271	56.9345	20.5534	5	1000000013
121.172	71.3526	28.6305	5	1000000014
133.856	95.4794	29.2612	5	1000000053
225.847	97.1707	16.5433	5	1000000038
4.19341	154.718	3.68933	5	1000000015
66.7533	174.891	6.2022	5	1000000016
81.3279	203.596	10.5	5	1000000043
99.8237	187.71	14.3085	5	1000000017
94.1638	103.554	16.5836	5	1000000018
46.016	122.327	16.4736	5	1000000019
41.2226	129.362	29.0033	5	1000000020
83.036	185.073	28.3205	5	1000000021
53.5674	132.684	30.1319	5	1000000066
123.699	172.906	6.30736	5	1000000023
146.588	198.57	8.86752	5	1000000048
173.998	117.997	10.46	5	1000000022
139.384	179.98	11.1982	5	1000000028
187.011	126.327	12.6061	5	1000000025
149.012	130.389	13.355	5	1000000024
175.768	134.908	12.5482	5	1000000026
105.149	155.65	14.9412	5	1000000027
176.207	110.744	16.3353	5	1000000030
134.899	139.352	17.4948	5	1000000031
112.711	188.646	16.6441	5	1000000029
140.103	194.581	19.5468	5	1000000067
127.059	172.365	21.5877	5	1000000033
178.685	202.699	24.0915	5	1000000052
150.838	120.701	26.2787	5	1000000034
185.917	139.813	27.0594	5	1000000032
140.742	148.027	26.2832	5	1000000055
157.248	183.171	28.6187	5	1000000057
212.205	149.679	9.94008	5	1000000036
246.634	140.633	11.5188	5	1000000037
220.058	129.293	19.0215	5	1000000039
86.1193	226.77	1	5	1000000040
37.7869	254.751	5.29447	5	1000000042
48.8733	223.841	6.16925	5	1000000041
68.4363	224.625	9.31103	5	1000000044
72.2733	248.166	15.125	5	1000000045
99.483	214.976	20.5385	5	1000000046
82.2704	251.903	25.7295	5	1000000047
176.546	203.724	7.24666	5	1000000049
139.775	236.533	8.01845	5	1000000050
180.19	215.349	10.7757	5	1000000063
189.514	230.475	11.0998	5	1000000068
140.554	256.63	21.6637	5	1000000051
120.353	258.138	26.1729	5	1000000065
230.658	25.0988	32.4552	5	1000000069
189.48	120.542	32.0707	5	1000000035
179.248	111.969	36.2188	5	1000000064
135.134	157.788	37.4061	5	1000000056
160.076	132.727	39.0738	5	1000000058
147.246	167.238	39.189	5	1000000059
150.16	177.237	42.2925	5	1000000060
103.866	203.247	45	5	1000000054
37.0759	236.976	35.6158	5	1000000061
114.288	207.31	45	5	1000000062
65.4106	47.9801	12.6062	6	1000000000
77.2099	69.5222	17.9635	6	1000000001
50.3612	80.9546	17.6209	6	1000000002
57.7409	90.0833	17.0213	6	1000000003
179.146	28.3101	8.52448	6	1000000005
102.71	88.1261	8.70222	6	1000000004
140.97	37.2425	11.008	6	1000000010
175.483	57.7357	11.0801	6	1000000006
180.777	92.9618	11.5483	6	1000000007
131.112	90.2974	15.2101	6	1000000008
171.332	90.8079	14.7698	6	1000000009
141.629	52.6379	16.715	6	1000000012
114.672	56.8716	21.0973	6	1000000013
187.638	81.842	20.7023	6	1000000011
134.797	93.6808	27.5883	6	1000000053
122.186	69.6784	28.7592	6	1000000014
226.564	94.702	16.8956	6	1000000038
5.67609	153.884	2.89351	6	1000000015
66.2297	174.506	5.89242	6	1000000016
82.6138	201.251	9.70886	6	1000000043
45.8409	121.58	15.009	6	1000000019
99.8219	186.858	14.4031	6	1000000017
94.931	102.948	16.693	6	1000000018
52.5116	131.065	26.2851	6	1000000066
85.2849	183.861	26.4578	6	1000000021
40.2148	128.779	28.1236	6	1000000020
124.023	173.293	6.26008	6	1000000023
176.862	202.023	7.14063	6	1000000049
148.428	198.843	9.08783	6	1000000048
175.568	117.068	11.0423	6	1000000022
185.794	125.031	11.6671	6	1000000025
176.2	133.999	11.5463	6	1000000026
141.329	179.08	10.9999	6	1000000028
148.875	129.668	13.4524	6	1000000024
106.858	154.881	14.6807	6	1000000027
176.929	109.538	16.4504	6	1000000030
135.213	137.155	16.9372	6	1000000031
112.64	188.479	16.6169	6	1000000029
140.263	194.547	19.573	6	1000000067
126.732	170.715	20.905	6	1000000033
180.897	201.159	23.7357	6	1000000052
141.56	146.821	24.6114	6	1000000055
151.063	120.224	27.6361	6	1000000034
186.813	137.729	26.9164	6	1000000032
157.972	180.659	27.7655	6	1000000057
211.822	149.102	9.66171	6	1000000036
246.828	139.551	11.7019	6	1000000037
220.866	126.72	18.2956	6	1000000039
85.4395	221.464	1	6	1000000040
38.8749	253.512	4.44489	6	1000000042
49.9081	223.437	6.29182	6	1000000041
69.8259	223.617	8.90806	6	1000000044
73.3731	248.587	13.5571	6	1000000045
98.9609	215.445	20.9989	6	1000000046
84.8952	251.828	24.6753	6	1000000047
141.431	235.25	7.83447	6	1000000050
179.853	216.122	10.1073	6	1000000063
190.182	228.025	10.8758	6	1000000068
142.422	254.052	20.268	6	1000000051
121.475	258.138	25.3009	6	1000000065
229.475	22.92	32.584	6	1000000069
191.342	119.093	35.9583	6	1000000035
179.613	110.775	36.4474	6	1000000064
162.001	131.721	38.7721	6	1000000058
135.901	155.206	38.8022	6	1000000056
147.937	165.904	39.0917	6	1000000059
151.769	174.688	42.7115	6	1000000060
103.908	203.607	45	6	1000000054
35.286	237.352	34.7118	6	1000000061
116.613	207.065	45	6	1000000062
100.813	87.6731	6.851	7	1000000004
65.799	47.6343	12.4226	7	1000000000
79.1047	68.2548	17.8198	7	1000000001
51.2263	79.5767	17.4368	7	1000000002
58.2902	88.9842	16.6286	7	1000000003
179.15	27.6329	8.59364	7	1000000005
142.23	38.0533	8.67394	7	1000000010
176.511	57.188	10.6697	7	1000000006
181.406	91.6102	10.9786	7	1000000007
130.863	88.3197	14.7279	7	1000000008
170.752	89.8391	15.3298	7	1000000009
141.717	52.1038	17.1707	7	1000000012
117.281	55.5713	20.9415	7	1000000013
187.912	80.2344	21.8677	7	1000000011
135.732	90.4216	26.2403	7	1000000053
122.2	68.7023	29.1977	7	1000000014
227.925	92.81	17.8	7	1000000038
228.975	21.3886	31.9573	7	1000000069
5.63198	151.995	2.58549	7	1000000015
67.7981	174.858	4.68148	7	1000000016
82.8889	201.852	9.36332	7	1000000043
46.5572	120.056	14.2837	7	1000000019
100.716	186.041	15.1677	7	1000000017
95.1947	103.218	16.1364	7	1000000018
53.4019	127.466	21.4143	7	1000000066
39.5159	127.835	26.9401	7	1000000020
86.0386	183.457	26.2831	7	1000000021
126.673	173.582	6.1837	7	1000000023
177.665	200.331	7.08068	7	1000000049
176.793	116.429	11.2307	7	1000000022
185.455	123.965	11.1289	7	1000000025
176.525	133.263	10.2235	7	1000000026
142.158	177.852	10.7148	7	1000000028
148.988	196.799	10.4872	7	1000000048
148.456	129.162	12.7825	7	1000000024
176.919	107.957	15.6782	7	1000000030
107.684	152.031	15.2049	7	1000000027
135.763	135.374	16.7873	7	1000000031
113.237	187.591	16.8526	7	1000000029
126.941	169.833	20.3298	7	1000000033
139.092	194.596	20.2237	7	1000000067
143.727	147.054	23.8131	7	1000000055
186.277	198.815	23.5207	7	1000000052
151.782	119.975	26.9916	7	1000000034
187.357	135.343	27.1827	7	1000000032
158.995	178.402	27.867	7	1000000057
212.106	148.117	9.27769	7	1000000036
246.84	140.318	11.8525	7	1000000037
220.801	125.035	18.4172	7	1000000039
85.6449	220.374	1	7	1000000040
50.1275	223.081	5.75408	7	1000000041
39.2203	253.33	4.17918	7	1000000042
71.208	222.658	8.29194	7	1000000044
74.0049	248.386	13.2401	7	1000000045
99.3442	215.265	21.8731	7	1000000046
86.6177	251.656	24.0714	7	1000000047
143.762	233.023	7.70637	7	1000000050
179.897	215.361	10.0723	7	1000000063
190.93	225.897	11.5674	7	1000000068
144.11	253.083	18.6972	7	1000000051
122.267	258.138	25.7517	7	1000000065
179.14	108.798	35.6498	7	1000000064
136.693	155.058	35.8483	7	1000000056
193.52	117.196	36.493	7	1000000035
162.217	131.072	38.3986	7	1000000058
149.807	164.311	40.3339	7	1000000059
152.937	172.702	42.4369	7	1000000060
104.417	202.231	45	7	1000000054
36.1126	234.609	35.3412	7	1000000061
119.797	205.837	45	7	1000000062
98.9435	87.0263	5.46609	8	1000000004
66.7607	46.5719	13.3107	8	1000000000
53.1087	76.915	15.7749	8	1000000002
58.1867	87.6293	15.0684	8	1000000003
81.2731	67.347	17.7111	8	1000000001
144.177	40.0538	6.08248	8	1000000010
179.284	27.6043	8.50772	8	1000000005
177.645	56.6059	11.4285	8	1000000006
181.73	89.3354	12.6834	8	1000000007
129.987	85.512	14.3476	8	1000000008
170.762	87.7709	14.9778	8	1000000009
141.707	50.6507	17.5597	8	1000000012
187.075	78.7802	22.7061	8	1000000011
119.204	56.4936	24.628	8	1000000013
135.617	88.2605	24.2597	8	1000000053
122.23	67.9235	28.6435	8	1000000014
225.131	97.4232	7.597	8	1000000070
229.687	91.4816	17.4073	8	1000000038
229.748	19.0729	30.3883	8	1000000069
7.23008	149.098	1	8	1000000015
69.0552	174.777	2.88274	8	1000000016
85.8571	202.336	9.46516	8	1000000043
48.2979	117.893	13.9574	8	1000000019
92.7574	102.829	15.4757	8	1000000018
100.908	185.209	14.248	8	1000000017
55.5123	123.319	17.8362	8	1000000066
38.6306	125.881	26.5788	8	1000000020
87.8328	181.68	28.6112	8	1000000021
127.266	172.949	6.08455	8	1000000023
178.912	198.607	6.52289	8	1000000049
176.509	132.044	9.1492	8	1000000026
178.089	115.984	11.6572	8	1000000022
185.949	122.605	10.6784	8	1000000025
141.916	176.861	10.0578	8	1000000028
150.094	194.675	10.2038	8	1000000048
147.535	130.423	12.711	8	1000000024
176.969	106.391	14.2064	8	1000000030
109.586	151.46	15.0589	8	1000000027
113.573	186.048	15.6038	8	1000000029
134.933	133.888	16.3244	8	1000000031
126.046	167.38	18.7146	8	1000000033
139.726	192.916	18.7274	8	1000000067
144.975	143.734	22.8383	8	1000000055
152.356	119.786	27.9575	8	1000000034
187.695	133.549	28.392	8	1000000032
157.94	177.104	28.0563	8	1000000057
210.887	147.414	9.44719	8	1000000036
247.57	139.741	12.0932	8	1000000037
221.522	124.682	17.1843	8	1000000039
86.4851	218.725	1	8	1000000040
51.0112	222.435	5.65766	8	1000000041
39.1186	251.867	4.05705	8	1000000042
72.114	221.558	8.11702	8	1000000044
75.6341	247.829	13.627	8	1000000045
99.2067	212.743	21.1072	8	1000000046
88.621	248.199	21.836	8	1000000047
98.3627	258.138	24.2311	8	1000000071
145.659	230.466	7.55489	8	1000000050
179.622	215.213	9.80051	8	1000000063
190.113	224.146	11.3624	8	1000000068
145.649	251.823	18.4344	8	1000000051
122.752	256.191	24.3756	8	1000000065
179.991	107.482	34.9093	8	1000000064
137.253	152.166	35.8015	8	1000000056
195.826	114.333	36.7846	8	1000000035
163.244	130.603	37.2638	8	1000000058
150.93	162.509	39.2225	8	1000000059
153.152	170.907	38.8703	8	1000000060
104.64	201.907	45	8	1000000054
37.1021	231.523	34.7806	8	1000000061
121.087	204.565	45	8	1000000062
225.981	247.423	39.5605	8	1000000072
190.167	196.672	22.3463	8	1000000052
96.9525	86.415	4.38004	9	1000000004
67.8149	45.2696	13.2313	9	1000000000
54.8924	73.658	14.5066	9	1000000002
58.2141	86.3885	14.6139	9	1000000003
83.0206	65.7064	18.0121	9	1000000001
146.826	43.1859	5.2826	9	1000000010
179.961	27.5658	9.29286	9	1000000005
177.445	56.5583	11.9619	9	1000000006
182.07	88.3005	13.7673	9	1000000007
126.301	81.7209	15.7882	9	1000000008
170.215	86.2656	15.8876	9	1000000009
143.447	48.9865	16.5041	9	1000000012
187.011	75.9698	22.5485	9	1000000011
135.281	85.7319	23.197	9	1000000053
119.039	55.9187	25.5942	9	1000000013
120.496	66.3	28.3739	9	1000000014
224.354	96.6865	7.05656	9	1000000070
230.49	88.3395	16.8039	9	1000000038
229.237	18.1563	29.0721	9	1000000069
7.98147	145.455	2.74998	9	1000000015
69.9662	173.873	3.23636	9	1000000016
86.9691	201.151	8.75645	9	1000000043
48.2849	115.837	13.265	9	1000000019
92.9893	101.839	15.5268	9	1000000018
57.1572	119.434	15.6524	9	1000000066
100.783	183.78	14.1276	9	1000000017
38.8546	124.402	26.9748	9	1000000020
89.7897	178.519	30.0083	9	1000000021
127.202	172.911	5.42106	9	1000000023
179.716	196.467	6.07391	9	1000000049
176.908	131.46	8.11017	9	1000000026
140.876	174.821	9.51546	9	1000000028
149.004	193.422	9.58019	9	1000000048
179.151	113.882	11.418	9	1000000022
185.642	121.151	10.1133	9	1000000025
145.389	130.524	11.6008	9	1000000024
176.518	104.506	12.8032	9	1000000030
113.359	185.03	13.987	9	1000000029
134.581	132.308	15.9824	9	1000000031
110.829	150.876	15.2415	9	1000000027
124.464	165.402	17.9785	9	1000000033
140.633	192.466	17.9447	9	1000000067
146.427	142.128	22.6195	9	1000000055
193.314	194.35	22.1953	9	1000000052
153.242	118.061	26.674	9	1000000034
188.956	131.677	29.6158	9	1000000032
159.741	175.547	28.6274	9	1000000057
210.467	146.435	9.56137	9	1000000036
247.79	138.513	12.3696	9	1000000037
222.09	123.489	17.1519	9	1000000039
87.034	217.644	1	9	1000000040
39.7402	250.918	3.39384	9	1000000042
50.7814	222.059	5.84763	9	1000000041
73.1463	219.896	8.05021	9	1000000044
76.8075	247.344	12.6054	9	1000000045
98.4551	212.58	19.8644	9	1000000046
91.6578	244.309	18.7346	9	1000000047
100.132	258.138	23.1857	9	1000000071
145.782	227.078	7.70297	9	1000000050
178.999	213.924	9.58897	9	1000000063
189.997	222.384	11.0384	9	1000000068
146.128	249.451	17.5076	9	1000000051
123.712	253.93	24.6968	9	1000000065
180.282	106.69	34.5071	9	1000000064
198.578	111.673	36.7654	9	1000000035
164.05	130.866	37.915	9	1000000058
138.226	149.743	37.1415	9	1000000056
154.618	169.739	37.9621	9	1000000060
152.436	160.879	38.4887	9	1000000059
104.182	202.51	45	9	1000000054
122.684	202.523	45	9	1000000062
37.0439	230.38	35.2676	9	1000000061
226.845	244.035	40.4764	9	1000000072
93.8118	85.632	2.82949	10	1000000004
69.0987	44.2484	12.0781	10	1000000000
56.317	70.4072	13.5972	10	1000000002
59.0603	85.0356	14.0918	10	1000000003
84.4354	64.3584	16.5586	10	1000000001
148.498	44.3925	4.77464	10	1000000010
180.676	27.2741	9.11173	10	1000000005
175.86	101.666	10.4819	10	1000000030
178.471	55.9567	12.5209	10	1000000006
145.405	47.3611	15.7948	10	1000000012
124.029	78.1236	15.9226	10	1000000008
183.537	87.2306	14.2658	10	1000000007
172.099	85.5032	18.9937	10	1000000009
188.84	74.0842	22.2414	10	1000000011
136.011	83.1055	22.4224	10	1000000053
121.785	55.1377	26.3086	10	1000000013
123.358	64.8618	27.4914	10	1000000014
224.755	96.1092	6.70024	10	1000000070
231.641	86.2626	17.3857	10	1000000038
229.169	17.1054	28.2749	10	1000000069
9.86514	141.672	3.17221	10	1000000015
70.1463	173.862	3.9178	10	1000000016
86.2852	201.073	7.39807	10	1000000043
48.7958	114.353	13.5052	10	1000000019
101.531	182.024	13.133	10	1000000017
93.2456	102.089	14.4235	10	1000000018
58.958	116.51	14.6102	10	1000000066
39.916	123.302	26.9516	10	1000000020
91.4235	176.161	31.4873	10	1000000021
127.096	172.234	5.55962	10	1000000023
180.256	194.646	5.80263	10	1000000049
178.483	112.297	9.95654	10	1000000022
178.456	131.155	8.67928	10	1000000026
140.725	173.249	9.30737	10	1000000028
149.865	191.127	8.74169	10	1000000048
186.459	119.889	11.0533	10	1000000025
143.818	130.84	11.6461	10	1000000024
114.388	183.675	13.2072	10	1000000029
110.35	148.387	14.7202	10	1000000027
141.009	190.742	15.4351	10	1000000067
134.188	131.066	16.092	10	1000000031
125.511	161.598	19.0305	10	1000000033
146.592	140.313	22.6689	10	1000000055
196.942	191.268	22.0868	10	1000000052
153.712	116.813	26.4703	10	1000000034
159.692	172.386	27.8296	10	1000000057
210.622	144.944	9.25723	10	1000000036
248.678	136.023	11.816	10	1000000037
223.982	121.667	16.5698	10	1000000039
88.2239	216.439	1	10	1000000040
40.1316	249.618	2.05843	10	1000000042
50.9116	220.7	4.48324	10	1000000041
75.6813	218.85	8.11716	10	1000000044
78.0447	245.493	11.3139	10	1000000045
98.6543	212.804	18.5288	10	1000000046
93.0173	242.549	18.0616	10	1000000047
147.948	225.721	7.31067	10	1000000050
179.472	213.988	9.17308	10	1000000063
190.829	220.853	11.0539	10	1000000068
145.422	247.161	18.2344	10	1000000051
103.035	258.138	22.6717	10	1000000071
124.047	251.733	24.7455	10	1000000065
179.722	105.999	33.8845	10	1000000064
189.431	128.292	32.404	10	1000000032
201.48	109.266	35.7446	10	1000000035
138.469	147.493	36.5178	10	1000000056
163.45	155.348	36.4713	10	1000000073
164.413	129.068	39.1545	10	1000000058
152.852	158.4	38.1937	10	1000000059
155.099	169.402	38.2433	10	1000000060
124.201	201.668	45	10	1000000062
103.932	202.523	45	10	1000000054
37.7276	229.709	36.8545	10	1000000061
103.81	258.138	40.4183	10	1000000074
226.532	241.535	39.05	10	1000000072
92.7554	85.2952	2.53534	11	1000000004
71.436	43.1738	12.8789	11	1000000000
56.8859	69.025	12.116	11	1000000002
59.7051	85.3314	13.2712	11	1000000003
92.1346	101.2	13.3286	11	1000000018
86.4801	62.2705	15.7672	11	1000000001
150.237	45.0326	4.078	11	1000000010
180.753	26.356	9.42584	11	1000000005
175.942	98.4964	9.21814	11	1000000030
179.283	55.07	12.3507	11	1000000006
146.072	45.3934	15.4879	11	1000000012
123.847	75.7056	15.6286	11	1000000008
184.991	86.0798	14.1433	11	1000000007
138.232	81.3723	20.8574	11	1000000053
173.753	83.5665	21.7712	11	1000000009
189.526	72.5464	22.197	11	1000000011
125.086	52.7295	26.4958	11	1000000013
124.398	64.0901	26.3938	11	1000000014
224.615	95.5266	7.04493	11	1000000070
233.126	83.1948	18.2818	11	1000000038
229.423	16.5048	27.1809	11	1000000069
71.3086	172.797	3.78982	11	1000000016
84.6074	200.094	3.46054	11	1000000043
12.7367	138.79	5.73856	11	1000000015
48.3758	113.98	13.4761	11	1000000019
59.9945	114.894	13.8897	11	1000000066
38.7411	122.894	26.697	11	1000000020
92.8325	176.69	31.5147	11	1000000021
127.786	171.398	4.90842	11	1000000023
180.863	193.323	5.73983	11	1000000049
177.807	130.784	7.30162	11	1000000026
151.54	189.799	7.63813	11	1000000048
178.474	110.974	9.82344	11	1000000022
185.542	119.245	11.3961	11	1000000025
140.683	172.338	10.1928	11	1000000028
143.204	130.843	12.103	11	1000000024
102.381	181.349	13.1495	11	1000000017
141.962	188.453	13.145	11	1000000067
110.208	147.709	14.0161	11	1000000027
115.48	183.795	14.9344	11	1000000029
134.942	129.331	16.253	11	1000000031
127.06	159.734	18.509	11	1000000033
198.452	188.141	19.8974	11	1000000052
148.07	138.159	22.3968	11	1000000055
154.62	115.577	26.0565	11	1000000034
161.088	171.057	27.3451	11	1000000057
210.338	144.781	8.83619	11	1000000036
249.346	134.691	11.7179	11	1000000037
226.17	120.268	15.7972	11	1000000039
88.6605	216.608	2.12981	11	1000000040
51.8877	219.557	3.86361	11	1000000041
40.7414	248.479	3.59265	11	1000000042
76.7334	217.656	7.77861	11	1000000044
79.2392	244.197	10.6766	11	1000000045
99.4718	210.534	17.408	11	1000000046
94.8512	239.981	17.2641	11	1000000047
147.203	225.483	6.9157	11	1000000050
179.434	212.724	8.82143	11	1000000063
190.727	217.464	12.6037	11	1000000068
145.646	246.606	17.6336	11	1000000051
104.121	258.138	23.8919	11	1000000071
125.326	251.237	24.8181	11	1000000065
192.338	56.3043	36.8781	11	1000000075
179.303	104.764	33.6933	11	1000000064
190.421	124.988	34.1418	11	1000000032
164.198	152.864	35.3333	11	1000000073
139.874	145.554	36.1276	11	1000000056
153.344	157.49	36.9962	11	1000000059
164.502	128.214	39.3365	11	1000000058
156.215	167.404	38.0675	11	1000000060
126.138	201.364	45	11	1000000062
104.237	202.337	45	11	1000000054
205.92	107.221	35.1789	11	1000000035
39.1155	228.161	38.0465	11	1000000061
105.331	258.138	41.5833	11	1000000074
227.583	239.166	36.2464	11	1000000072
91.797	85.2306	2.3301	12	1000000004
57.0057	66.3321	9.45818	12	1000000002
74.4766	41.3161	13.4822	12	1000000000
60.367	84.76	12.656	12	1000000003
90.9365	100.388	12.339	12	1000000018
86.9023	59.727	15.4184	12	1000000001
152.009	44.5492	3.27445	12	1000000010
181.834	25.1761	9.39528	12	1000000005
177.09	96.139	8.85568	12	1000000030
179.968	53.6211	12.8279	12	1000000006
124.078	74.4213	15.6521	12	1000000008
186.453	84.6446	14.9776	12	1000000007
147.725	41.7789	17.573	12	1000000012
139.114	78.7158	19.7243	12	1000000053
190.439	70.2839	21.6211	12	1000000011
174.706	80.786	21.9871	12	1000000009
125.644	63.3742	24.7129	12	1000000014
127.016	50.7958	26.4213	12	1000000013
224.166	94.9105	7.54211	12	1000000070
234.61	82.6142	17.7772	12	1000000038
229.106	15.2699	25.861	12	1000000069
72.1442	172.326	3.75041	12	1000000016
16.2297	135.732	5.90761	12	1000000015
82.9784	200.792	5.13988	12	1000000043
61.7988	112.98	12.9835	12	1000000066
48.8573	111.491	14.2952	12	1000000019
39.2664	121.531	24.8383	12	1000000020
128.118	170.261	4.9798	12	1000000023
181.602	191.3	4.62833	12	1000000049
178.882	129.914	6.64158	12	1000000026
153.337	187.597	7.73143	12	1000000048
178.679	109.203	9.57696	12	1000000022
142.948	130.513	11.7701	12	1000000024
140.76	172.406	11.5567	12	1000000028
142.814	185.179	10.7993	12	1000000067
185.441	118.014	12.3344	12	1000000025
103.679	179.898	13.0098	12	1000000017
111.202	145.862	14.9371	12	1000000027
117.526	182.984	15.3886	12	1000000029
136.42	128.765	16.4723	12	1000000031
128.385	158.214	18.173	12	1000000033
201.227	185.187	18.3786	12	1000000052
149.813	138.324	21.4133	12	1000000055
154.652	113.184	25.5689	12	1000000034
163.047	168.361	26.4185	12	1000000057
210.176	143.212	8.49175	12	1000000036
250.309	133.718	10.9281	12	1000000037
229.135	121.116	14.6276	12	1000000039
87.2634	217.409	2.27648	12	1000000040
52.4275	218.972	3.94388	12	1000000041
41.2167	246.789	4.0958	12	1000000042
78.6083	216.852	7.67625	12	1000000044
80.522	241.583	9.96898	12	1000000045
100.499	208.829	16.7042	12	1000000046
96.5465	237.097	16.2763	12	1000000047
147.127	223.622	6.87851	12	1000000050
179.643	211.556	8.34913	12	1000000063
191.668	215.934	12.6428	12	1000000068
146.334	245.187	17.6168	12	1000000051
124.954	250.089	24.8684	12	1000000065
106.991	258.138	24.6723	12	1000000071
226.827	258.138	10.5901	12	1000000076
192.317	55.2845	38.0911	12	1000000075
92.9419	175.326	34.157	12	1000000021
178.749	103.637	32.9907	12	1000000064
167.058	149.933	32.6326	12	1000000073
194.087	122.068	34.8484	12	1000000032
141.294	144.386	34.7018	12	1000000056
154.817	155.364	35.884	12	1000000059
157.213	164.443	36.6106	12	1000000060
164.617	126.148	38.3263	12	1000000058
125.781	199.485	42.7281	12	1000000062
104.368	201.392	45	12	1000000054
207.965	106.725	33.0331	12	1000000035
41.1481	227.076	36.7596	12	1000000061
106.784	258.138	42.9769	12	1000000074
229.499	237.235	36.5188	12	1000000072
91.4724	84.7318	1	13	1000000004
57.8989	64.6937	8.68984	13	1000000002
91.0444	99.5466	11.4894	13	1000000018
61.2638	83.2786	12.3802	13	1000000003
77.6344	40.4299	15.5135	13	1000000000
87.2883	58.3413	15.9678	13	1000000001
152.811	43.4104	4.35838	13	1000000010
177.509	94.0143	7.64063	13	1000000030
181.634	24.58	10.2814	13	1000000005
180.289	51.9015	12.4938	13	1000000006
188.771	83.4225	15.8329	13	1000000007
150.677	41.4374	16.714	13	1000000012
124.028	74.0648	17.766	13	1000000008
140.542	76.6852	18.4987	13	1000000053
191.238	68.7117	21.5031	13	1000000011
175.345	78.6755	21.5311	13	1000000009
123.743	63.055	24.0844	13	1000000014
128.197	48.6105	26.6997	13	1000000013
222.786	93.6053	7.37799	13	1000000070
233.193	81.3006	17.4392	13	1000000038
229.623	14.2788	24.7227	13	1000000069
72.6773	171.343	2.72593	13	1000000016
19.7617	133.489	4.31346	13	1000000015
83.2216	200.225	4.48115	13	1000000043
62.8377	112.455	11.0077	13	1000000066
50.2492	109.249	14.1914	13	1000000019
39.3139	121.955	24.0446	13	1000000020
179.773	128.806	5.85886	13	1000000026
127.78	170.352	5.55033	13	1000000023
182.714	190.445	5.68632	13	1000000049
153.983	186.893	6.90975	13	1000000048
178.998	107.406	8.25267	13	1000000022
143.613	184.469	9.76861	13	1000000067
185.223	117.207	11.4609	13	1000000025
141.751	130.611	11.5971	13	1000000024
139.517	170.679	12.4172	13	1000000028
104.749	178.369	13.2533	13	1000000017
113.607	145.997	14.3499	13	1000000027
139.139	129.374	16.7926	13	1000000031
130.553	156.817	17.6363	13	1000000033
117.526	183.622	16.5356	13	1000000029
203.132	183.946	17.1945	13	1000000052
152.826	136.877	21.1627	13	1000000055
155.869	109.962	25.8111	13	1000000034
164.789	166.932	25.1577	13	1000000057
180.901	102.53	31.1537	13	1000000064
169.203	148.62	30.525	13	1000000073
209.587	142.715	8.60648	13	1000000036
250.807	132.914	11.0027	13	1000000037
229.461	122.739	13.0855	13	1000000039
52.6231	219.132	3.23358	13	1000000041
41.2549	245.715	3.57826	13	1000000042
81.3098	215.243	7.55667	13	1000000044
80.8101	240.513	9.20128	13	1000000045
101.459	207.314	15.2646	13	1000000046
97.3655	235.685	16.4048	13	1000000047
148.743	222.112	6.39099	13	1000000050
181.02	210.792	8.40427	13	1000000063
193.331	213.264	13.0545	13	1000000068
148.395	244.851	15.7728	13	1000000051
109.709	254.391	25.4943	13	1000000071
126.107	248.557	26.4215	13	1000000065
172.712	258.138	26.9568	13	1000000077
229.023	258.138	9.43512	13	1000000076
191.789	54.6782	37.7818	13	1000000075
93.8134	172.987	34.4809	13	1000000021
142.548	144.349	33.0482	13	1000000056
157.229	153.602	35.2799	13	1000000059
197.319	119.012	36.1771	13	1000000032
164.551	123.336	37.2237	13	1000000058
157.157	162.241	36.282	13	1000000060
126.879	198.158	41.2666	13	1000000062
103.866	200.274	45	13	1000000054
209.858	105.31	32.2067	13	1000000035
42.739	225.628	35.8814	13	1000000061
108.876	254.899	45	13	1000000074
231.086	235.859	35.2841	13	1000000072
86.7947	220.72	1	13	1000000040
90.487	84.5468	1	14	1000000004
57.6615	63.9532	7.58596	14	1000000002
61.6267	82.328	11.2694	14	1000000003
89.9187	99.4195	11.5299	14	1000000018
86.8736	57.4161	14.4189	14	1000000001
77.8791	39.9437	16.2397	14	1000000000
153.245	43.2546	4.33405	14	1000000010
178.371	91.8487	6.58235	14	1000000030
182.758	23.4468	10.7639	14	1000000005
180.781	50.7205	13.1382	14	1000000006
151.65	40.1894	16.8657	14	1000000012
123.305	73.2319	17.1589	14	1000000008
143.445	76.0161	16.1634	14	1000000053
190.11	80.8631	17.3636	14	1000000007
191.504	66.4381	21.8456	14	1000000011
176.583	77.3411	21.1344	14	1000000009
122.18	62.4383	22.4003	14	1000000014
128.892	47.2093	25.3183	14	1000000013
222.114	93.9753	7.15389	14	1000000070
230.401	80.4999	18.6254	14	1000000038
228.64	12.4584	23.5811	14	1000000069
19.8755	132.513	3.33402	14	1000000015
73.3982	170.416	3.08536	14	1000000016
83.8243	199.317	5.27318	14	1000000043
62.3019	111.34	10.8537	14	1000000066
51.2272	107.462	15.4054	14	1000000019
39.9285	120.472	22.506	14	1000000020
180.929	128.24	4.92642	14	1000000026
127.728	170.11	4.99885	14	1000000023
183.666	188.682	4.90366	14	1000000049
178.142	106.08	7.13685	14	1000000022
152.614	186.702	6.32764	14	1000000048
140.679	132.092	9.83035	14	1000000024
143.269	182.711	9.67007	14	1000000067
185.885	115.795	10.9353	14	1000000025
114.279	144.938	11.718	14	1000000027
104.541	176.952	12.9594	14	1000000017
137.452	169.603	14.5174	14	1000000028
203.277	182.448	15.5028	14	1000000052
132.538	156.549	16.8442	14	1000000033
117.123	182.901	17.2276	14	1000000029
141.681	128.437	18.311	14	1000000031
155.013	135.033	19.6049	14	1000000055
156.523	108.622	25.3821	14	1000000034
165.502	164.736	25.7683	14	1000000057
170.202	146.554	27.7266	14	1000000073
181.444	102.01	28.2516	14	1000000064
143.819	142.806	31.8241	14	1000000056
210.049	143.279	8.20973	14	1000000036
250.706	131.239	10.8625	14	1000000037
230.653	122.408	12.9248	14	1000000039
53.9181	219.671	2.41959	14	1000000041
40.7975	245.096	3.02687	14	1000000042
80.7483	213.875	6.8367	14	1000000044
81.9557	237.643	7.02793	14	1000000045
98.7232	232.873	14.7853	14	1000000047
149.637	221.152	5.59145	14	1000000050
181.337	209.911	8.33277	14	1000000063
103.272	206.303	13.8611	14	1000000046
194.485	212.101	12.9788	14	1000000068
151.294	244.639	15.413	14	1000000051
126.384	258.138	17.6114	14	1000000078
172.774	258.138	24.8025	14	1000000077
125.092	247.397	27.3941	14	1000000065
110.879	253.439	27.5878	14	1000000071
230.604	258.138	9.1172	14	1000000076
190.487	53.7028	37.1462	14	1000000075
95.1516	170.424	33.8014	14	1000000021
197.683	118.199	35.5335	14	1000000032
164.35	120.436	35.7977	14	1000000058
158.379	151.357	34.245	14	1000000059
156.491	159.747	36.591	14	1000000060
128.42	196.405	38.7411	14	1000000062
103.756	198.932	45	14	1000000054
211.352	103.918	33.0707	14	1000000035
45.8993	222.685	33.5615	14	1000000061
108.481	254.253	45	14	1000000074
231.356	233.672	37.6112	14	1000000072
87.5975	220.478	1	14	1000000040
89.6996	84.2201	1	15	1000000004
57.9035	62.43	7.24836	15	1000000002
61.937	81.3993	10.2516	15	1000000003
89.8033	99.1805	11.5826	15	1000000018
85.9374	56.6235	13.3578	15	1000000001
78.7551	39.0634	16.1633	15	1000000000
153.984	43.5697	3.7312	15	1000000010
178.769	90.2825	6.23631	15	1000000030
183.491	23.1201	10.5632	15	1000000005
181.019	51.0919	13.0668	15	1000000006
153.14	38.5253	15.9049	15	1000000012
143.537	76.0602	15.8166	15	1000000053
123.744	73.0233	16.9917	15	1000000008
190.548	80.7745	17.2003	15	1000000007
176.403	77.8206	19.7046	15	1000000009
121.49	62.0142	20.9487	15	1000000014
192.676	66.0168	21.9137	15	1000000011
129.771	44.9392	24.3755	15	1000000013
221.729	93.531	7.03896	15	1000000070
230.108	78.9404	18.5544	15	1000000038
229.021	12.3378	22.0511	15	1000000069
19.6597	132.045	1	15	1000000015
74.4973	170.493	2.8336	15	1000000016
83.4822	199.154	5.04227	15	1000000043
64.607	110.299	9.84995	15	1000000066
52.717	106.298	16.2613	15	1000000019
40.755	118.766	20.5537	15	1000000020
181.151	127.22	4.80395	15	1000000026
127.047	168.989	4.81246	15	1000000023
185.322	188.323	4.31452	15	1000000049
177.362	105.665	6.78826	15	1000000022
152.508	185.086	6.22758	15	1000000048
115.014	144.995	9.59883	15	1000000027
143.991	181.145	9.70758	15	1000000067
186.66	114.419	10.7748	15	1000000025
136.887	133.25	10.9494	15	1000000024
104.705	176.126	13.0013	15	1000000017
137.491	168.219	14.7701	15	1000000028
203.334	182.129	14.251	15	1000000052
134.159	156.014	16.4844	15	1000000033
145.173	125.812	19.111	15	1000000031
156.143	132.838	18.3841	15	1000000055
116.739	183.203	18.8818	15	1000000029
183.37	102	26.2236	15	1000000064
157.474	109.915	26.6457	15	1000000034
171.43	146.283	26.095	15	1000000073
166.015	163.81	26.1725	15	1000000057
144.587	140.73	31.0758	15	1000000056
210.401	142.489	8.86738	15	1000000036
250.552	130.7	10.6604	15	1000000037
231.712	123.153	12.4552	15	1000000039
84.5509	220.606	1	15	1000000040
53.7564	219.574	2.22439	15	1000000041
41.1293	244.674	2.65425	15	1000000042
81.0317	213.259	6.39367	15	1000000044
82.2504	236.371	6.45838	15	1000000045
99.8649	230.711	14.7507	15	1000000047
150.684	219.715	5.09085	15	1000000050
182.82	209.242	8.99764	15	1000000063
104.716	205.654	13.3476	15	1000000046
196.14	210.236	13.2206	15	1000000068
157.791	244.796	15.0102	15	1000000051
126.546	258.138	17.057	15	1000000078
174.846	255.156	23.4967	15	1000000077
125.742	246.645	27.5309	15	1000000065
108.819	255.965	26.7222	15	1000000071
230.874	256.027	9.13695	15	1000000076
189.872	52.6371	34.8733	15	1000000075
96.0316	168.429	35.542	15	1000000021
198.665	116.297	33.6329	15	1000000032
164.783	118.746	33.3057	15	1000000058
159.11	148.641	33.4181	15	1000000059
156.353	155.631	37.4914	15	1000000060
128.967	196.325	37.8594	15	1000000062
103.514	198.611	45	15	1000000054
212.936	102.223	32.0091	15	1000000035
49.1702	221.184	32.2305	15	1000000061
109.448	253.863	45	15	1000000074
233.044	233.298	36.1586	15	1000000072
0.397748	66.545	1	16	1000000079
90.1236	83.896	1	16	1000000004
58.1721	60.8848	6.65813	16	1000000002
61.1466	79.1908	9.73956	16	1000000003
90.354	98.6746	11.6521	16	1000000018
85.356	55.3294	12.7058	16	1000000001
80.5861	37.1032	16.5556	16	1000000000
156.293	42.1282	4.86282	16	1000000010
179.091	87.5831	5.91606	16	1000000030
183.222	23.3899	9.92741	16	1000000005
181.485	50.3583	12.7844	16	1000000006
145.878	74.0771	14.6803	16	1000000053
154.233	37.3645	16.5233	16	1000000012
123.426	73.4208	16.7064	16	1000000008
191.973	78.034	17.6974	16	1000000007
120.722	61.5197	20.4882	16	1000000014
193.589	64.5616	21.2128	16	1000000011
177.952	77.7553	20.2021	16	1000000009
130.816	43.3315	23.8741	16	1000000013
185.69	99.5862	23.627	16	1000000064
222.184	94.1894	7.24509	16	1000000070
230.14	77.8336	18.3312	16	1000000038
229.772	12.8214	21.7736	16	1000000069
213.163	100.612	31.5701	16	1000000035
21.681	131.134	2.90991	16	1000000015
75.3792	168.335	2.34987	16	1000000016
84.5362	198.997	4.64167	16	1000000043
65.9801	109.261	9.06082	16	1000000066
53.6657	105.857	15.2413	16	1000000019
42.0378	116.889	19.6567	16	1000000020
181.48	128.005	3.8707	16	1000000026
128.583	168.443	3.57396	16	1000000023
185.646	187.45	3.60288	16	1000000049
153.969	185.057	5.73989	16	1000000048
176.688	104.486	6.60674	16	1000000022
115.68	143.966	8.35249	16	1000000027
145.497	179.062	9.1598	16	1000000067
187.979	114.285	10.2333	16	1000000025
135.075	132.584	11.2543	16	1000000024
105.293	175.481	12.7648	16	1000000017
147.835	124.259	17.8425	16	1000000031
134.971	154.437	16.5377	16	1000000033
138.534	166.633	16.0803	16	1000000028
158.335	130.337	18.8452	16	1000000055
117.653	185.43	19.4766	16	1000000029
171.524	147.551	24.889	16	1000000073
159.868	109.918	26.5562	16	1000000034
167.27	162.889	26.7602	16	1000000057
165.169	117.91	31.3215	16	1000000058
146.594	138.504	30.8978	16	1000000056
159.5	147.139	31.5828	16	1000000059
210.783	141.562	8.61305	16	1000000036
250.141	129.287	10.3676	16	1000000037
232.798	121.804	12.3507	16	1000000039
205.232	181.667	13.3023	16	1000000052
83.6589	220.69	1	16	1000000040
53.9432	219.949	2.68727	16	1000000041
41.9811	245.014	3.26244	16	1000000042
83.5856	234.297	5.84556	16	1000000045
82.8944	211.436	6.41079	16	1000000044
51.8174	219.567	31.2844	16	1000000061
151.636	219.164	4.88345	16	1000000050
185.026	208.665	8.29014	16	1000000063
105.425	205.596	13.3137	16	1000000046
199.877	207.177	13.3789	16	1000000068
163.812	243.912	13.4881	16	1000000051
101.944	228.128	14.6359	16	1000000047
129.129	258.138	17.583	16	1000000078
177.254	253.023	22.7511	16	1000000077
108.555	255.307	25.5184	16	1000000071
125.265	245.35	28.1801	16	1000000065
231.719	254.407	9.05417	16	1000000076
189.495	50.6695	34.5657	16	1000000075
98.4169	167.182	34.7611	16	1000000021
201.92	115.245	33.2931	16	1000000032
130.987	194.701	37.5155	16	1000000062
156.723	154.123	38.5159	16	1000000060
105.084	197.85	45	16	1000000054
109.955	253.967	43.4415	16	1000000074
233.638	233.21	35.5068	16	1000000072
0.397748	66.1423	1	17	1000000079
90.8392	84.7454	1	17	1000000004
58.6388	59.2629	6.15716	17	1000000002
60.9334	77.6188	10.1754	17	1000000003
90.996	99.3551	10.9402	17	1000000018
87.281	54.4027	12.9341	17	1000000001
82.0251	35.0539	15.1446	17	1000000000
158.085	41.8906	4.92592	17	1000000010
180.212	85.9599	5.57826	17	1000000030
184.419	22.7627	10.2913	17	1000000005
181.634	50.1208	13.42	17	1000000006
122.543	73.2416	15.4166	17	1000000008
147.625	73.3915	14.5986	17	1000000053
155.786	36.245	16.9259	17	1000000012
192.28	75.6509	18.3184	17	1000000007
177.839	77.2212	19.6704	17	1000000009
120.797	60.197	20.1641	17	1000000014
195.366	61.8786	21.1159	17	1000000011
186.335	98.6248	22.0428	17	1000000064
130.814	41.9728	24.7111	17	1000000013
221.613	93.8376	7.13969	17	1000000070
231.079	75.5802	18.0696	17	1000000038
230.669	12.1806	21.267	17	1000000069
213.46	99.5284	30.8681	17	1000000035
22.5165	130.736	2.66576	17	1000000015
76.9099	166.372	3.64851	17	1000000016
84.6599	198.171	4.61302	17	1000000043
67.6009	106.76	9.50216	17	1000000066
54.3067	103.516	15.0656	17	1000000019
84.9635	118.07	14.5686	17	1000000080
43.0944	114.286	18.3838	17	1000000020
129.292	168.188	2.56582	17	1000000023
185.926	187.673	2.35951	17	1000000049
177.442	105.338	5.34558	17	1000000022
181.697	128.165	4.22057	17	1000000026
154.717	184.768	5.1137	17	1000000048
116.242	143.742	6.81247	17	1000000027
146.082	176.159	9.73982	17	1000000067
190.24	113.87	10.0639	17	1000000025
105.095	175.412	11.8985	17	1000000017
134.753	131.864	12.3554	17	1000000024
105.988	203.636	12.4537	17	1000000046
150.209	122.157	16.5357	17	1000000031
135.888	153.248	16.9478	17	1000000033
139.481	164.252	16.6923	17	1000000028
186.45	183.715	16.4688	17	1000000081
159.912	127.832	18.5083	17	1000000055
119.287	185.245	19.3796	17	1000000029
172.564	147.405	24.6337	17	1000000073
162.703	108.766	27.8821	17	1000000034
162.165	145.46	28.4808	17	1000000059
167.462	162.502	28.1823	17	1000000057
165.636	116.206	31.2974	17	1000000058
250.624	126.867	9.63947	17	1000000037
210.622	141.372	8.86731	17	1000000036
234.803	119.552	11.9202	17	1000000039
207.309	180.967	13.6915	17	1000000052
83.5681	220.877	1	17	1000000040
54.5473	221.334	2.16046	17	1000000041
41.4873	246.011	2.73682	17	1000000042
83.6487	210.66	4.60475	17	1000000044
83.0864	234.451	4.61249	17	1000000045
54.3531	218.615	30.9363	17	1000000061
153.078	218.899	5.01088	17	1000000050
186.925	207.55	6.79212	17	1000000063
200.97	203.818	13.681	17	1000000068
105.237	223.659	13.2824	17	1000000047
167.301	243.208	13.2407	17	1000000051
131.535	258.138	18.6954	17	1000000078
178.93	250.836	23.7699	17	1000000077
108.512	253.318	26.44	17	1000000071
125.494	242.96	28.6703	17	1000000065
232.652	252.451	9.25047	17	1000000076
188.749	49.8698	34.3287	17	1000000075
99.6535	165.498	33.2399	17	1000000021
203.124	113.764	33.0978	17	1000000032
148.669	137.37	32.6642	17	1000000056
158.363	152.42	37.5893	17	1000000060
131.838	192.454	36.8957	17	1000000062
106.272	196.073	45	17	1000000054
110.195	252.967	45	17	1000000074
233.587	232.085	34.7109	17	1000000072
0.397748	65.9079	1	18	1000000079
90.7897	85.155	1	18	1000000004
61.0376	57.189	6.50123	18	1000000002
60.8658	76.3397	9.90367	18	1000000003
93.8944	100.821	8.94818	18	1000000018
87.2903	52.9327	11.4463	18	1000000001
83.9078	32.8905	13.4099	18	1000000000
55.8453	98.9208	16.1817	18	1000000019
160.479	40.902	5.53534	18	1000000010
182.428	83.5568	5.48273	18	1000000030
184.417	20.8878	10.1685	18	1000000005
181.956	47.5599	13.5174	18	1000000006
148.831	72.213	15.3259	18	1000000053
123.04	73.0345	14.3094	18	1000000008
157.424	34.5346	16.7861	18	1000000012
122.104	58.0289	19.8682	18	1000000014
192.274	72.6461	19.6015	18	1000000007
177.858	76.0754	19.2814	18	1000000009
197.516	59.3703	21.7607	18	1000000011
184.878	98.7884	20.7539	18	1000000064
131.947	39.9694	26.7628	18	1000000013
222.485	94.1197	7.17624	18	1000000070
231.261	74.6452	19.3189	18	1000000038
232.338	11.3971	20.9294	18	1000000069
213.816	97.3801	31.8539	18	1000000035
21.8068	129.562	1	18	1000000015
83.5078	197.722	1	18	1000000043
78.4184	165.22	3.86247	18	1000000016
69.3982	104.867	9.64673	18	1000000066
45.4179	112.125	15.6956	18	1000000020
87.1454	116.373	15.7149	18	1000000080
130.981	167.938	1	18	1000000023
185.583	186.032	1	18	1000000049
181.402	128.708	3.43732	18	1000000026
178.001	105.31	5.2852	18	1000000022
156.753	184.056	5.25193	18	1000000048
117.455	144.267	6.56438	18	1000000027
190.789	113.311	9.53965	18	1000000025
147.46	173.568	10.2844	18	1000000067
107.496	201.054	11.7369	18	1000000046
135.039	130.015	12.7402	18	1000000024
105.774	174.668	12.5808	18	1000000017
152.999	119.125	17.3531	18	1000000031
136.786	152.735	17.2594	18	1000000033
141.7	161.888	16.5975	18	1000000028
189.256	181.314	16.9945	18	1000000081
161.867	125.078	19.023	18	1000000055
121.01	185.441	18.9411	18	1000000029
165.324	143.155	25.3092	18	1000000059
174.518	146.835	24.3264	18	1000000073
170.106	160.071	28.7514	18	1000000057
167.001	109.14	30.6531	18	1000000034
166.104	115.488	30.9451	18	1000000058
250.802	126.316	9.06905	18	1000000037
211.977	139.856	8.84861	18	1000000036
237.376	118.694	11.4169	18	1000000039
208.608	180.253	13.1846	18	1000000052
204.254	202.218	14.9436	18	1000000068
54.6508	221.389	1	18	1000000041
82.4856	221.39	1	18	1000000040
43.5762	246.758	2.8309	18	1000000042
85.2142	209.388	4.39603	18	1000000044
83.194	234.974	5.12319	18	1000000045
94.1329	258.138	9.08053	18	1000000082
56.3153	216.775	31.4524	18	1000000061
189.286	206.53	6.28026	18	1000000063
154.731	217.711	6.86547	18	1000000050
107.051	220.727	13.8094	18	1000000047
170.756	243.899	14.3638	18	1000000051
132.102	255.973	18.7922	18	1000000078
162.372	235.666	21.7245	18	1000000083
179.289	248.672	26.0581	18	1000000077
109.291	252.196	26.6594	18	1000000071
125.409	242.245	29.6685	18	1000000065
233.954	250.129	9.17918	18	1000000076
188.643	48.5814	35.2708	18	1000000075
100.507	162.805	32.7392	18	1000000021
150.291	137.123	33.6263	18	1000000056
160.743	150.409	36.4846	18	1000000060
131.85	191.306	36.9138	18	1000000062
106.152	194.972	43.2354	18	1000000054
204.282	112.693	32.7442	18	1000000032
111.253	253.354	43.7092	18	1000000074
234.362	229.915	34.0875	18	1000000072
2.1055	64.6076	1	19	1000000079
91.9053	85.4163	1	19	1000000004
64.0033	55.0359	6.73431	19	1000000002
60.9755	75.1395	9.2229	19	1000000003
94.3079	101.587	9.03151	19	1000000018
87.8868	52.4348	11.3841	19	1000000001
86.7969	32.183	13.1006	19	1000000000
56.6625	94.8515	15.3355	19	1000000019
162.622	38.7328	5.98085	19	1000000010
184.265	81.4729	6.01041	19	1000000030
186.552	18.774	9.33443	19	1000000005
123.2	71.3365	11.9505	19	1000000008
182.463	45.3335	13.3701	19	1000000006
150.148	69.6615	15.5855	19	1000000053
157.76	32.4959	16.4963	19	1000000012
122.828	55.9083	19.6862	19	1000000014
192.028	69.8944	19.2616	19	1000000007
177.347	75.8466	18.0626	19	1000000009
185.24	97.3089	18.853	19	1000000064
199.894	55.7582	21.3104	19	1000000011
133.392	37.6115	28.3153	19	1000000013
224.269	94.1464	6.90706	19	1000000070
232.024	72.3814	19.9085	19	1000000038
233.959	12.2237	20.063	19	1000000069
24.2334	128.713	1	19	1000000015
83.2	196.901	1	19	1000000043
80.2985	163.626	3.86616	19	1000000016
70.8704	104.198	8.64121	19	1000000066
46.0831	111.474	13.8978	19	1000000020
87.596	115.115	15.2108	19	1000000080
131.679	167.38	1	19	1000000023
187.55	185.716	1	19	1000000049
180.761	128.105	3.01454	19	1000000026
178.764	104.601	5.17086	19	1000000022
118.719	144.171	4.63709	19	1000000027
158.22	183.654	4.84622	19	1000000048
192.413	113.182	9.33189	19	1000000025
148.059	171.844	9.41382	19	1000000067
106.922	175.202	11.9432	19	1000000017
109.964	199.28	11.6358	19	1000000046
134.394	128.693	12.6579	19	1000000024
142.895	158.838	15.3385	19	1000000028
155.291	117.178	16.7645	19	1000000031
139.194	150.815	17.3355	19	1000000033
191.709	177.629	16.2133	19	1000000081
163.732	123.346	18.2332	19	1000000055
123.702	185.132	19.4072	19	1000000029
167.401	141.774	23.0094	19	1000000059
174.51	146.568	24.7837	19	1000000073
169.705	158.405	29.3895	19	1000000057
171.918	109.848	30.7715	19	1000000034
167.904	114.051	31.1348	19	1000000058
250.989	125.213	9.06372	19	1000000037
213.311	139.263	8.81548	19	1000000036
238.412	118.81	10.6127	19	1000000039
209.583	178.998	11.8821	19	1000000052
206.312	199.942	15.5063	19	1000000068
205.459	112.277	30.3545	19	1000000032
82.3273	220.038	1	19	1000000040
56.7035	221.247	1	19	1000000041
87.1788	207.998	3.63535	19	1000000044
46.3696	245.905	3.13055	19	1000000042
84.152	234.775	4.31021	19	1000000045
95.9354	258.138	9.62478	19	1000000082
58.5038	214.977	29.9974	19	1000000061
189.805	205.62	5.55461	19	1000000063
157.11	216.347	6.44196	19	1000000050
109.163	217.224	12.7865	19	1000000047
173.705	243.078	15.5632	19	1000000051
134.054	254.051	19.6733	19	1000000078
164.03	235.623	20.6862	19	1000000083
109.501	248.492	26.476	19	1000000071
180.127	247.23	28.2339	19	1000000077
124.706	240.894	31.2049	19	1000000065
235.205	248.633	9.54865	19	1000000076
188.351	46.8626	34.9214	19	1000000075
215.154	96.0281	32.7055	19	1000000035
101.484	160.36	32.552	19	1000000021
152.347	136.981	35.3799	19	1000000056
161.695	150.066	35.0194	19	1000000060
131.567	188.916	36.0743	19	1000000062
106.673	192.692	43.4438	19	1000000054
113.199	252.815	42.8199	19	1000000074
236.253	226.589	34.2346	19	1000000072
91.811	86.2567	1	20	1000000004
3.41228	63.9633	2.67779	20	1000000079
66.6841	52.5326	8.12139	20	1000000002
62.0014	74.1226	8.83844	20	1000000003
95.6628	101.66	9.43383	20	1000000018
90.7517	32.6533	13.178	20	1000000000
89.194	51.5873	12.4837	20	1000000001
58.0522	93.3134	15.4532	20	1000000019
163.498	38.0367	5.72503	20	1000000010
184.813	79.1344	5.81828	20	1000000030
188.061	17.0512	9.09361	20	1000000005
123.619	70.3412	9.0808	20	1000000008
184.407	43.8384	13.3564	20	1000000006
159.14	30.8424	15.8739	20	1000000012
152.126	67.8355	15.4602	20	1000000053
178.333	75.3288	16.9252	20	1000000009
185.54	95.3757	17.8004	20	1000000064
123.425	54.3226	19.7315	20	1000000014
201.91	53.9547	21.5978	20	1000000011
193.781	67.0966	20.0275	20	1000000007
135.663	36.572	30.9531	20	1000000013
224.967	93.3674	6.44428	20	1000000070
237.038	11.6869	20.0856	20	1000000069
232.462	71.2932	20.8785	20	1000000038
24.4691	128.737	1	20	1000000015
82.0266	196.796	1	20	1000000043
81.3038	161.862	3.33366	20	1000000016
72.8668	103.527	8.2995	20	1000000066
46.8625	109.714	12.4889	20	1000000020
88.7724	114.451	15.3657	20	1000000080
131.763	166.879	1	20	1000000023
190.625	184.534	1	20	1000000049
180.497	128.724	3.36476	20	1000000026
118.312	143.798	2.4343	20	1000000027
180.494	103.623	5.37382	20	1000000022
159.833	181.697	4.48781	20	1000000048
193.361	111.386	9.08467	20	1000000025
148.671	171.056	9.2618	20	1000000067
133.666	128.282	11.7111	20	1000000024
108.004	174.602	11.1877	20	1000000017
111.175	197.849	11.3942	20	1000000046
158.943	114.689	17.3006	20	1000000031
165.924	122.177	17.3493	20	1000000055
141.646	148.532	16.7057	20	1000000033
146.044	157.682	16.401	20	1000000028
195.822	173.099	16.4228	20	1000000081
170.645	139.595	20.4007	20	1000000059
125.728	184.467	20.5884	20	1000000029
175.447	144.959	25.0183	20	1000000073
174.397	109.425	29.0503	20	1000000034
169.983	156.925	29.2347	20	1000000057
170.338	112.471	30.8228	20	1000000058
214.647	139.628	7.8583	20	1000000036
239.641	117.165	9.10071	20	1000000039
251.888	124.671	9.08354	20	1000000037
211.919	177.447	11.9196	20	1000000052
209.303	196.885	16.9916	20	1000000068
206.219	111.509	27.8932	20	1000000032
82.5746	218.397	1	20	1000000040
88.9841	206.792	3.39122	20	1000000044
58.5046	221.802	2.18903	20	1000000041
47.8546	244.469	2.73892	20	1000000042
85.1407	234.364	5.61587	20	1000000045
97.2779	258.138	9.99529	20	1000000082
61.7403	212.557	29.5736	20	1000000061
191.19	204.891	5.13208	20	1000000063
160.296	215.823	6.03552	20	1000000050
111.121	213.786	12.2947	20	1000000047
176.172	241.693	16.9062	20	1000000051
164.733	234.715	19.8052	20	1000000083
134.832	251.204	23.0692	20	1000000078
110.425	246.089	27.0957	20	1000000071
149.49	258.138	26.5208	20	1000000084
236.52	247.386	8.83786	20	1000000076
189.26	45.7821	35.0075	20	1000000075
215.77	94.6116	32.9847	20	1000000035
102.049	159.28	32.014	20	1000000021
153.599	136.529	35.1765	20	1000000056
162.639	147.908	34.0325	20	1000000060
133.342	188.169	37.4016	20	1000000062
107.758	190.501	41.5162	20	1000000054
124.711	240.786	33.1057	20	1000000065
180.775	245.393	32.1973	20	1000000077
113.633	252.484	41.8555	20	1000000074
239.938	225.528	33.0253	20	1000000072
3.66449	63.3819	1	21	1000000079
91.378	86.2742	1	21	1000000004
68.1589	49.5987	7.98035	21	1000000002
74.7221	101.54	7.8078	21	1000000066
62.921	73.1403	8.22273	21	1000000003
96.3242	101.363	8.69365	21	1000000018
93.3453	34.1766	13.0349	21	1000000000
91.0656	50.6579	13.136	21	1000000001
59.7319	92.7266	14.569	21	1000000019
164.741	37.74	5.88842	21	1000000010
186.009	75.3563	5.18128	21	1000000030
188.922	16.9012	8.36147	21	1000000005
122.249	70.0109	8.51084	21	1000000008
184.854	43.2643	13.0882	21	1000000006
160.834	30.0848	15.6574	21	1000000012
177.578	74.3085	15.6035	21	1000000009
154.048	67.0541	16.172	21	1000000053
187.035	94.2631	16.2471	21	1000000064
123.924	53.4236	18.8641	21	1000000014
194.976	64.3623	21.074	21	1000000007
225.049	91.0196	5.33756	21	1000000070
238.12	10.1901	19.7525	21	1000000069
234.593	69.6267	21.5041	21	1000000038
204.18	53.0773	22.6528	21	1000000011
24.9697	127.861	1	21	1000000015
82.8555	195.655	1	21	1000000043
83.8812	161.979	2.34324	21	1000000016
48.7405	107.863	11.986	21	1000000020
91.0843	114.557	15.5615	21	1000000080
132.633	166.586	1	21	1000000023
180.749	128.948	2.21735	21	1000000026
118.1	143.593	2.10963	21	1000000027
191.326	183.745	2.02539	21	1000000049
180.491	103.1	4.88439	21	1000000022
161.547	180.181	5.47406	21	1000000048
195.047	109.665	8.29984	21	1000000025
149.966	169.54	9.5078	21	1000000067
132.871	127.071	11.0923	21	1000000024
109.193	174.895	11.3619	21	1000000017
112.498	195.374	11.4389	21	1000000046
148.187	156.4	15.8875	21	1000000028
199.587	171.783	14.6844	21	1000000081
159.974	112.606	17.9284	21	1000000031
168.088	120.241	16.4302	21	1000000055
174.65	138.06	16.9438	21	1000000059
143.551	146.139	16.8187	21	1000000033
129.404	183.913	20.9409	21	1000000029
176.37	143.419	23.8906	21	1000000073
176.978	109.199	28.0381	21	1000000034
171.238	155.454	28.534	21	1000000057
171.812	110.002	30.6954	21	1000000058
103.88	157.964	30.8319	21	1000000021
239.06	118.762	7.69799	21	1000000039
216.064	138.904	7.42225	21	1000000036
252.514	124.513	9.04048	21	1000000037
214.977	175.785	11.3187	21	1000000052
210.784	195.393	16.2761	21	1000000068
206.641	110.773	27.6883	21	1000000032
83.3822	216.795	1	21	1000000040
91.0768	205.55	2.58076	21	1000000044
61.5411	221.445	3.7051	21	1000000041
49.5342	243.639	2.43968	21	1000000042
86.5711	234.151	4.65324	21	1000000045
98.5482	257.737	9.72182	21	1000000082
62.9532	212.815	29.0549	21	1000000061
192.091	204.817	4.93651	21	1000000063
163.241	216.95	6.92451	21	1000000050
115.621	208.85	11.2679	21	1000000047
178.039	240.785	16.7974	21	1000000051
166.4	234.192	18.9017	21	1000000083
134.993	249.968	23.5017	21	1000000078
149.888	258.138	25.5166	21	1000000084
110.284	245.286	26.5036	21	1000000071
238.163	246.433	7.88308	21	1000000076
0.397748	47.3704	30.5475	21	1000000085
189.734	44.2546	34.282	21	1000000075
138.098	36.7988	36.2461	21	1000000013
216.175	93.5856	32.6842	21	1000000035
163.155	146.567	33.2798	21	1000000060
156.072	135.429	34.9966	21	1000000056
134.847	187.814	36.7865	21	1000000062
108.089	189.53	41.6653	21	1000000054
180.395	243.37	33.3224	21	1000000077
123.982	239.829	35.3263	21	1000000065
112.056	252.333	41.8388	21	1000000074
242.104	224.852	33.4877	21	1000000072
92.3002	86.8028	1	22	1000000004
6.21524	61.9911	2.22545	22	1000000079
69.0326	47.9897	7.32796	22	1000000002
63.1436	72.3762	7.36448	22	1000000003
76.2643	100.641	7.3096	22	1000000066
97.2352	100.82	8.95644	22	1000000018
96.0496	34.3985	12.8796	22	1000000000
92.8604	49.9601	13.3685	22	1000000001
61.187	92.0429	13.9545	22	1000000019
165.188	38.1567	5.75584	22	1000000010
188.884	72.1332	4.10925	22	1000000030
120.019	70.3931	7.93457	22	1000000008
190.212	16.4729	8.51462	22	1000000005
184.852	42.0598	13.2743	22	1000000006
177.586	73.0366	13.6367	22	1000000009
188.65	91.2327	13.7007	22	1000000064
155.85	65.7373	15.9904	22	1000000053
162.172	28.1174	17.6031	22	1000000012
124.206	52.6316	18.1816	22	1000000014
195.603	62.4243	21.8672	22	1000000007
225.896	88.8818	5.39701	22	1000000070
240.772	7.34989	19.1372	22	1000000069
203.888	51.1217	22.5178	22	1000000011
236.261	67.0012	22.6302	22	1000000038
217.073	93.4382	31.9297	22	1000000035
27.0631	125.976	1	22	1000000015
86.5343	161.657	1	22	1000000016
82.7125	195.641	1	22	1000000043
92.0461	203.646	2.19066	22	1000000044
49.3879	106.041	10.5225	22	1000000020
92.8383	115.043	15.9508	22	1000000080
180.929	128.517	1	22	1000000026
133.841	166.459	1	22	1000000023
190.882	183.065	1	22	1000000049
117.573	142.643	2.40644	22	1000000027
180.895	102.505	4.88128	22	1000000022
163.017	179.317	5.54876	22	1000000048
197.36	106.878	7.24616	22	1000000025
132.958	126.812	9.79521	22	1000000024
149	168.945	10.2048	22	1000000067
109.11	174.663	10.5158	22	1000000017
115.312	193.623	11.7706	22	1000000046
201.704	170.529	13.1765	22	1000000081
171.393	119.053	15.5817	22	1000000055
177.007	136.245	14.496	22	1000000059
145.82	145.225	15.9237	22	1000000033
150.714	154.527	15.5083	22	1000000028
161.071	109.97	17.6659	22	1000000031
129.863	183.061	20.4797	22	1000000029
177.468	141.812	23.0024	22	1000000073
180.056	109.884	27.2067	22	1000000034
172.423	154.78	27.725	22	1000000057
105.871	155.656	29.5348	22	1000000021
170.814	109.056	31.2276	22	1000000058
216.138	138.467	6.91707	22	1000000036
238.071	118.203	8.30968	22	1000000039
252.181	123.186	8.38029	22	1000000037
217.56	173.667	10.539	22	1000000052
211.393	193.452	16.4923	22	1000000068
207.537	109.813	26.8524	22	1000000032
84.1863	215.485	1	22	1000000040
50.3095	244.295	1	22	1000000042
89.635	234.205	2.99357	22	1000000045
62.9376	221.292	4.36347	22	1000000041
99.019	257.284	9.4393	22	1000000082
64.5561	212.334	28.8727	22	1000000061
191.979	204.942	4.85648	22	1000000063
167.947	216.569	7.67902	22	1000000050
117.512	206.707	10.4363	22	1000000047
178.447	240.958	16.8071	22	1000000051
166.639	232.812	19.0705	22	1000000083
134.944	248.466	23.5095	22	1000000078
150.567	254.926	25.5079	22	1000000084
111.934	243.003	26.3279	22	1000000071
240.738	244.636	8.41596	22	1000000076
1.55033	50.6054	36.5364	22	1000000085
190.63	42.2657	34.4366	22	1000000075
140.465	36.641	36.5384	22	1000000013
164.164	145.43	32.0639	22	1000000060
157.735	135.351	35.3519	22	1000000056
136.102	187.056	37.1385	22	1000000062
108.274	188.296	41.045	22	1000000054
125.128	239.246	35.1721	22	1000000065
181.83	241.095	35.3841	22	1000000077
111.646	250.596	41.1051	22	1000000074
240.748	224.554	36.2928	22	1000000072
243.17	258.138	43.5655	22	1000000086
8.58641	60.6621	1	23	1000000079
90.8278	87.5653	1	23	1000000004
63.8863	71.3774	6.80755	23	1000000003
77.4537	100.834	7.50543	23	1000000066
70.4092	46.7795	8.86583	23	1000000002
98.3286	100.176	8.24638	23	1000000018
98.8065	34.498	13.3848	23	1000000000
93.5733	48.9975	12.7669	23	1000000001
62.6334	90.9333	14.8177	23	1000000019
190.344	69.5999	3.51738	23	1000000030
165.31	38.8214	6.18053	23	1000000010
119.122	70.6183	7.37911	23	1000000008
190.252	17.2174	8.15159	23	1000000005
185.515	40.7441	13.4659	23	1000000006
176.655	72.1834	13.5145	23	1000000009
189.435	90.2903	12.0329	23	1000000064
158.487	64.1053	15.5368	23	1000000053
164.103	25.2797	17.1504	23	1000000012
125.108	51.8908	18.4177	23	1000000014
195.061	59.3933	22.8633	23	1000000007
225.553	86.7468	5.79979	23	1000000070
240.622	5.18118	18.0857	23	1000000069
205.16	49.8338	21.2727	23	1000000011
237.556	64.7678	24.4715	23	1000000038
217.695	92.2747	31.5474	23	1000000035
29.0209	125.065	1	23	1000000015
87.9031	160.982	1	23	1000000016
81.3098	195.727	1	23	1000000043
93.3853	201.791	2.16269	23	1000000044
50.6253	103.728	10.2	23	1000000020
93.7054	114.656	16.3473	23	1000000080
181.657	127.269	1	23	1000000026
133.318	165.349	1	23	1000000023
190.617	181.634	1	23	1000000049
117.314	141.193	2.40157	23	1000000027
105.747	156.301	3.81765	23	1000000087
180.838	102.956	4.17732	23	1000000022
164.63	177.592	4.52914	23	1000000048
199.558	104.945	6.7957	23	1000000025
132.859	128.313	8.79686	23	1000000024
149.962	168.004	9.65611	23	1000000067
202.395	169.354	11.8544	23	1000000081
108.81	173.454	10.0981	23	1000000017
119.356	191.536	11.541	23	1000000046
179.822	131.258	13.2409	23	1000000059
173.691	117.126	14.7445	23	1000000055
148.015	143.102	14.9096	23	1000000033
163.344	108.486	17.6796	23	1000000031
153.966	152.248	16.3885	23	1000000028
178.061	139.794	21.3859	23	1000000073
132.893	182.42	20.2457	23	1000000029
180.719	107.53	26.7639	23	1000000034
173.441	153.076	27.6998	23	1000000057
164.57	143.186	28.9547	23	1000000060
108.013	153.017	29.5377	23	1000000021
170.047	107.124	30.5787	23	1000000058
216.958	136.431	6.48378	23	1000000036
237.83	118.031	8.48873	23	1000000039
252.531	122.09	8.59131	23	1000000037
218.43	172.658	10.4205	23	1000000052
212.551	191.237	15.9875	23	1000000068
207.222	108.799	26.0274	23	1000000032
85.1784	214.209	1	23	1000000040
49.9954	244.554	1	23	1000000042
64.1999	219.776	3.68456	23	1000000041
91.9369	232.958	2.43224	23	1000000045
99.7598	256.152	8.6559	23	1000000082
66.0139	210.903	28.399	23	1000000061
192.016	204.604	5.18676	23	1000000063
171.328	216.468	8.43604	23	1000000050
117.81	204.97	11.0997	23	1000000047
180.74	239.515	16.7384	23	1000000051
167.571	231.739	18.6671	23	1000000083
111.232	243.346	24.5713	23	1000000071
136.059	244.056	24.9316	23	1000000078
150.219	251.208	25.1121	23	1000000084
243.477	241.572	8.79648	23	1000000076
3.82844	51.1637	36.8506	23	1000000085
190.687	40.1251	34.7191	23	1000000075
143.588	35.8681	37.5956	23	1000000013
159.159	134.335	34.3985	23	1000000056
138.926	186.84	38.183	23	1000000062
108.068	188.337	43.5283	23	1000000054
181.709	239.309	35.4257	23	1000000077
124.333	238.848	37.0641	23	1000000065
112.211	249.871	41.2237	23	1000000074
238.181	223.822	37.0712	23	1000000072
243.774	258.138	41.7635	23	1000000086
90.287	88.2478	1	24	1000000004
11.2899	59.595	2.60041	24	1000000079
64.1927	70.2384	6.11261	24	1000000003
99.2973	99.8573	7.72467	24	1000000018
72.063	45.3855	9.55692	24	1000000002
78.7824	99.9552	8.4096	24	1000000066
95.1394	47.6535	12.5726	24	1000000001
101.633	35.5493	14.1346	24	1000000000
63.4998	89.6194	14.3816	24	1000000019
191.48	67.5211	3.1179	24	1000000030
165.952	38.7454	5.59001	24	1000000010
191.539	17.1034	7.93154	24	1000000005
118.633	70.4221	7.71005	24	1000000008
189.769	89.1196	10.5642	24	1000000064
185.86	39.9585	12.8687	24	1000000006
176.525	70.2051	12.5775	24	1000000009
159.528	62.7962	14.3681	24	1000000053
165.508	23.4459	16.5288	24	1000000012
125.077	50.6364	18.2041	24	1000000014
195.431	56.6708	23.1554	24	1000000007
226.38	86.2911	4.87645	24	1000000070
240.606	5.30247	16.7032	24	1000000069
205.637	48.6955	20.0491	24	1000000011
237.428	60.3563	30.9762	24	1000000038
219.201	91.4709	30.3523	24	1000000035
31.1371	123.433	1	24	1000000015
89.3508	161.238	1	24	1000000016
80.1197	197.015	1	24	1000000043
94.4293	200.459	1	24	1000000044
51.6853	102.205	9.61256	24	1000000020
93.91	114.92	15.8194	24	1000000080
182.054	125.894	1	24	1000000026
133.437	164.77	1	24	1000000023
191.728	179.957	1	24	1000000049
117.23	140.082	2.19744	24	1000000027
107.091	156.379	3.94652	24	1000000087
180.82	102.046	4.06352	24	1000000022
202.33	102.145	5.83169	24	1000000025
166.775	175.703	4.22769	24	1000000048
132.03	129.341	6.88262	24	1000000024
108.495	172.67	8.76357	24	1000000017
181.266	129.544	11.6575	24	1000000059
147.819	166.489	10.0333	24	1000000067
120.885	189.536	10.8593	24	1000000046
120.737	202.604	11.1795	24	1000000047
174.805	115.414	14.2648	24	1000000055
147.293	142.249	14.1614	24	1000000033
156.124	151.139	16.5723	24	1000000028
165.056	105.359	18.1114	24	1000000031
177.556	138.618	20.7928	24	1000000073
133.981	181.856	20.1193	24	1000000029
181.108	106.706	26.5456	24	1000000034
174.168	151.153	27.8794	24	1000000057
164.381	143.319	28.2529	24	1000000060
109.975	149.001	29.1895	24	1000000021
170.614	104.538	30.7146	24	1000000058
217.416	136.154	5.95157	24	1000000036
238.043	118.238	8.08367	24	1000000039
251.802	119.347	9.25244	24	1000000037
220.934	170.984	9.76849	24	1000000052
204.958	167.264	11.7868	24	1000000081
213.539	190.026	15.2975	24	1000000068
209.761	108.448	26.718	24	1000000032
86.4746	213.289	1	24	1000000040
93.8772	233.521	1	24	1000000045
52.4066	244.897	1	24	1000000042
65.072	217.82	4.04296	24	1000000041
99.913	255.21	8.47623	24	1000000082
68.6875	212.513	28.7927	24	1000000061
191.648	204.179	4.79824	24	1000000063
172.703	214.981	8.75714	24	1000000050
167.714	229.353	17.5506	24	1000000083
182.545	237.894	17.7616	24	1000000051
111.666	242.257	23.0198	24	1000000071
150.729	249.489	25.4711	24	1000000084
136.923	241.094	26.0589	24	1000000078
245.225	240.546	8.66202	24	1000000076
5.03869	49.8845	36.2171	24	1000000085
192.242	38.7752	33.7297	24	1000000075
160.022	133.415	33.6918	24	1000000056
139.633	186.291	38.5698	24	1000000062
108.422	187.966	43.3161	24	1000000054
181.06	235.586	36.3615	24	1000000077
124.922	239.238	38.1479	24	1000000065
111.743	250.271	39.5625	24	1000000074
121.248	210.545	45	24	1000000088
235.141	222.315	36.1175	24	1000000072
242.57	258.138	39.5088	24	1000000086
147.149	33.8086	38.6566	24	1000000013
12.6003	58.5903	1	25	1000000079
89.573	87.9771	2.31221	25	1000000004
64.7933	69.4802	5.5368	25	1000000003
99.2955	98.1638	7.08891	25	1000000018
80.136	98.9653	8.8838	25	1000000066
53.0728	101.174	8.79971	25	1000000020
75.8139	45.838	11.8515	25	1000000002
97.2151	46.8679	11.2555	25	1000000001
65.2422	90.3569	13.095	25	1000000019
192.934	65.8398	3.16087	25	1000000030
180.556	101.224	3.36554	25	1000000022
166.348	38.6143	5.16485	25	1000000010
192.357	17.2341	7.80462	25	1000000005
119.395	69.9324	7.50649	25	1000000008
190.941	87.7083	9.54216	25	1000000064
175.491	68.7201	11.0249	25	1000000009
186.555	39.9253	12.5418	25	1000000006
160.787	63.5446	13.471	25	1000000053
104.406	35.8197	15.4453	25	1000000000
167.294	21.5226	16.1364	25	1000000012
126.405	49.1195	18.4598	25	1000000014
195.242	54.3499	24.369	25	1000000007
226.903	85.9153	4.62789	25	1000000070
204.436	100.591	4.70583	25	1000000025
241.347	5.37591	16.9284	25	1000000069
207.398	48.0418	19.0944	25	1000000011
222.095	90.1939	30.0534	25	1000000035
33.0404	124.031	1	25	1000000015
91.0351	160.521	1	25	1000000016
80.8387	195.864	1	25	1000000043
96.3168	198.37	2.0519	25	1000000044
93.0912	116.601	16.2416	25	1000000080
182.288	126.215	1	25	1000000026
117.874	138.992	1	25	1000000027
133.874	165.852	1	25	1000000023
193.177	178.729	1	25	1000000049
131.036	129.989	5.52231	25	1000000024
107.865	156.259	4.46881	25	1000000087
169.167	173.797	4.73669	25	1000000048
191.911	203.09	4.15071	25	1000000063
147.996	165.362	9.45662	25	1000000067
107.363	171.005	8.93321	25	1000000017
182.534	127.893	10.9577	25	1000000059
123.665	187.44	11.3469	25	1000000046
123.162	200.904	11.1188	25	1000000047
148.968	141.094	13.5061	25	1000000033
175.954	112.166	14.169	25	1000000055
167.17	104.037	17.9193	25	1000000031
157.61	150.794	16.3926	25	1000000028
177.901	136.438	19.1654	25	1000000073
135.292	180.332	19.2772	25	1000000029
182.186	105.123	26.7275	25	1000000034
163.739	142.229	29.409	25	1000000060
113.469	145.327	29.8512	25	1000000021
174.875	148.243	28.4908	25	1000000057
217.572	136.814	5.75984	25	1000000036
236.871	119.797	7.71033	25	1000000039
251.573	116.434	9.22357	25	1000000037
224.643	170.201	10.0042	25	1000000052
206.341	165.59	12.5723	25	1000000081
215.039	188.714	15.6622	25	1000000068
210.649	107.968	27.4276	25	1000000032
97.1565	210.295	7.76794	25	1000000040
94.3579	233.616	1	25	1000000045
52.8689	246.56	1	25	1000000042
67.2811	216.735	2.76446	25	1000000041
100.018	252.929	8.74023	25	1000000082
70.4848	211.553	29.3223	25	1000000061
177.154	213.644	7.76214	25	1000000050
167.72	229.15	9.59434	25	1000000089
183.165	237.639	16.9449	25	1000000051
168.703	226.339	18.0365	25	1000000083
113.125	240.881	22.6047	25	1000000071
152.45	245.909	24.8464	25	1000000084
138.133	239.244	26.896	25	1000000078
247.624	239.66	8.63308	25	1000000076
230.364	258.138	9.04784	25	1000000090
5.41026	49.0683	36.1485	25	1000000085
194.241	37.7095	32.3214	25	1000000075
173.357	98.6589	32.4592	25	1000000058
148.372	32.6368	38.911	25	1000000013
238.397	56.6214	32.4369	25	1000000038
159.194	131.142	32.7679	25	1000000056
140.217	183.556	38.9456	25	1000000062
110.052	187.301	41.9502	25	1000000054
181.479	233.183	38.2719	25	1000000077
125.521	238.592	38.9223	25	1000000065
111.537	250.332	38.7718	25	1000000074
122.431	211.679	45	25	1000000088
233.81	221.71	37.1559	25	1000000072
245.561	258.138	38.5789	25	1000000086
14.3021	57.3679	1	26	1000000079
89.0355	87.3107	2.76408	26	1000000004
63.2501	68.4141	6.13326	26	1000000003
98.9637	97.0357	7.09765	26	1000000018
54.6891	100.947	7.7194	26	1000000020
98.1516	45.2774	9.6913	26	1000000001
80.9314	99.4859	9.03408	26	1000000066
76.2435	45.5147	13.5042	26	1000000002
66.1888	89.2682	13.1827	26	1000000019
180.052	101.339	2.90279	26	1000000022
167.38	38.1648	5.33189	26	1000000010
194.017	63.8637	4.16406	26	1000000030
194.755	16.7108	7.06706	26	1000000005
120.548	68.5775	9.20624	26	1000000008
192.592	86.1269	8.63711	26	1000000064
175.98	67.3978	10.4994	26	1000000009
186.736	39.8611	13.1615	26	1000000006
161.813	63.0971	13.1564	26	1000000053
169.255	19.8452	16.5639	26	1000000012
105.541	34.5964	16.044	26	1000000000
124.635	48.5747	18.8763	26	1000000014
195.233	51.3215	25.3665	26	1000000007
196.003	36.6753	31.7278	26	1000000075
228.193	85.8832	2.75671	26	1000000070
207.341	100.147	3.60298	26	1000000025
242.276	5.82922	17.3625	26	1000000069
207.878	47.1319	19.3068	26	1000000011
223.246	88.6767	28.6932	26	1000000035
33.317	122.907	1	26	1000000015
82.5644	194.813	1	26	1000000043
93.0352	159.06	3.87563	26	1000000016
97.769	197.121	2.42453	26	1000000044
92.9301	117.909	16.2954	26	1000000080
182.444	124.862	1	26	1000000026
120.6	137.702	1	26	1000000027
133.168	165.227	1	26	1000000023
192.985	178.593	2.27652	26	1000000049
192.143	202.943	3.44276	26	1000000063
130.618	130.197	5.05399	26	1000000024
107.81	155.174	4.77251	26	1000000087
173.377	172.301	6.57908	26	1000000048
107.212	169.371	8.5129	26	1000000017
184.597	126.407	10.9602	26	1000000059
149.036	163.865	10.8185	26	1000000067
124.601	199.38	11.5073	26	1000000047
177.639	108.386	13.0321	26	1000000055
152.012	139.69	12.972	26	1000000033
126.17	184.977	12.0778	26	1000000046
159.918	150.283	16.2707	26	1000000028
170.178	102.403	18.6499	26	1000000031
178.429	134.267	19.0673	26	1000000073
137.263	178.034	19.0724	26	1000000029
184.703	105.757	26.4145	26	1000000034
158.225	128.982	29.413	26	1000000056
164.63	140.9	28.729	26	1000000060
113.909	140.956	30.3965	26	1000000021
176.088	144.505	30.3881	26	1000000057
218.083	136.437	5.75088	26	1000000036
236.297	120.457	7.16466	26	1000000039
251.847	115.087	9.38309	26	1000000037
[truncated: 6,750 more rows]

## Sheet: NCadM-1-NcadMSide
Position
Position X	Position Y	Position Z	Time	TrackID
57.1274	26.87	7.16424	1	1000000000
30.8411	18.1891	13.6246	1	1000000001
35.7919	62.2987	16.9432	1	1000000002
24.0237	84.7382	17.4621	1	1000000003
55.4022	84.1567	19.8265	1	1000000004
76.6694	97.4781	19.8601	1	1000000005
48.3654	20.1908	22.242	1	1000000006
77.5842	92.0757	28.4782	1	1000000007
102.289	24.3061	8.33089	1	1000000008
163.769	84.453	13.33	1	1000000009
114.637	28.2301	16.0251	1	1000000010
103.951	41.4352	15.6586	1	1000000011
125.295	93.4706	15.8962	1	1000000012
194.629	67.981	21.7958	1	1000000013
172.507	92.9494	21.7643	1	1000000014
154.878	35.7288	23.0734	1	1000000015
152.169	67.0436	25.5874	1	1000000016
131.293	82.1609	26.3785	1	1000000017
159.149	54.8916	31.1666	1	1000000018
233.63	30.5308	3.66492	1	1000000019
207.501	22.2641	11.0779	1	1000000020
217.589	60.8771	10.7999	1	1000000021
252.465	65.5459	12.5598	1	1000000022
230.719	66.1319	13.3895	1	1000000023
225.128	80.4585	12.9726	1	1000000024
255.152	90.4089	14.427	1	1000000025
69.1309	130.16	13.6183	1	1000000026
19.5399	125.759	19.9217	1	1000000027
46.0438	104.301	20.2627	1	1000000028
65.1117	169.599	23.4687	1	1000000029
86.5949	134.757	27.2789	1	1000000030
126.449	125.617	19.8247	1	1000000031
144.768	186.301	21.2695	1	1000000032
173.965	169.029	22.8591	1	1000000033
139.448	148.144	25.8456	1	1000000034
196.041	194.098	30.1551	1	1000000035
213.377	112.394	10.9579	1	1000000036
224.005	167.546	11.0881	1	1000000037
258.138	147.151	13.3826	1	1000000038
258.138	157.065	12.5219	1	1000000039
252.539	196.173	14.0394	1	1000000040
218.82	127.102	18.8918	1	1000000041
239.701	171.806	25.4693	1	1000000042
49.1963	249.563	11.5116	1	1000000043
70.2003	205.496	17.6249	1	1000000044
46.1373	258.138	18.9197	1	1000000045
61.4931	243.702	21.4605	1	1000000046
93.7632	219.239	30.6047	1	1000000047
190.371	226.08	18.5837	1	1000000048
113.766	231.335	18.5699	1	1000000049
160.235	207.502	22.3946	1	1000000050
130.984	258.138	26.7658	1	1000000051
180.484	251.4	28.9431	1	1000000052
258.138	246.284	11.368	1	1000000053
221.572	223.398	14.5964	1	1000000054
156.915	89.9139	45	1	1000000055
245.372	151.688	38.9266	1	1000000056
108.212	234.922	45	1	1000000057
146.144	220.666	23	1	1000000095
57.3304	25.3656	6.97855	2	1000000000
30.8745	18.1493	11.5537	2	1000000001
24.4939	83.7423	17.3215	2	1000000003
36.3885	61.2382	18.1327	2	1000000002
55.9645	82.6507	19.9269	2	1000000004
77.8332	95.7603	19.0268	2	1000000005
48.2407	18.6546	21.7365	2	1000000006
76.6698	90.6244	27.7069	2	1000000007
102.791	24.2485	8.41024	2	1000000008
162.619	82.567	13.8106	2	1000000009
116.056	27.6736	15.251	2	1000000010
103.927	41.0018	14.969	2	1000000011
123.84	93.8845	15.9417	2	1000000012
172.3	91.1089	20.9723	2	1000000014
193.427	66.0741	22.1819	2	1000000013
154.46	32.5937	25.4921	2	1000000015
147.611	64.7284	26.647	2	1000000016
129.732	82.1082	26.2041	2	1000000017
232.708	30.3264	5.05634	2	1000000019
205.932	22.3558	11.1871	2	1000000020
217.589	59.878	11.1052	2	1000000021
223.258	80.8824	11.6698	2	1000000024
251.479	64.9855	13.5027	2	1000000022
229.808	67.8694	12.1977	2	1000000023
253.653	90.9366	14.382	2	1000000025
68.2006	130.128	13.3901	2	1000000026
47.3629	104.18	19.5497	2	1000000028
18.9064	124.649	18.4825	2	1000000027
67.8433	170.229	22.92	2	1000000029
86.2541	137.393	27.06	2	1000000030
125.735	124.553	19.5808	2	1000000031
144.29	186.1	19.544	2	1000000032
172.353	167.193	23.81	2	1000000033
139.446	149.088	25.9133	2	1000000034
194.083	194.399	30.546	2	1000000035
209.745	112.119	10.2311	2	1000000036
223.433	167.65	10.3712	2	1000000037
251.376	195.956	14.2503	2	1000000040
258.138	150.216	17.3535	2	1000000038
221.373	127.329	18.1014	2	1000000041
236.682	172.128	26.4445	2	1000000042
46.4418	247.225	11.5864	2	1000000043
70.2531	205.489	17.617	2	1000000044
46.7394	258.138	18.9724	2	1000000045
60.216	242.25	23.0103	2	1000000046
92.1408	215.345	31.1688	2	1000000047
190.502	225.571	18.4476	2	1000000048
115.311	227.011	20.8098	2	1000000049
158.754	207.812	23.2775	2	1000000050
132.167	258.138	27.999	2	1000000051
180.172	249.454	30.2308	2	1000000052
258.138	245.703	10.9223	2	1000000053
221.209	223.32	15.3221	2	1000000054
158.199	54.6645	32.4328	2	1000000018
156.195	89.1145	45	2	1000000055
245.26	149.317	38.5999	2	1000000056
104.345	232.968	45	2	1000000057
145.877	220.665	23	2	1000000095
57.0657	26.59	7.30768	3	1000000000
29.7284	19.0021	12.3777	3	1000000001
26.2538	84.143	16.6551	3	1000000003
38.6504	60.3569	18.7719	3	1000000002
59.3757	84.3366	19.2689	3	1000000004
79.2777	94.9233	18.5501	3	1000000005
47.7788	18.6661	22.1379	3	1000000006
77.3394	89.988	28.8297	3	1000000007
103.553	23.4156	8.96913	3	1000000008
106.065	40.944	14.2598	3	1000000011
164.189	81.3961	14.3602	3	1000000009
116.674	25.4153	16.5504	3	1000000010
124.243	93.3332	16.4115	3	1000000012
172.756	90.7988	21.6578	3	1000000014
192.678	66.6933	23.3955	3	1000000013
153.467	31.3746	25.6456	3	1000000015
144.829	64.4762	26.1905	3	1000000016
126.821	81.1292	26.4079	3	1000000017
157.771	53.8101	30.9926	3	1000000018
233.1	30.3227	4.12297	3	1000000019
206.473	22.1267	10.7147	3	1000000020
217.135	59.2453	13.6618	3	1000000021
250.292	64.3211	13.4138	3	1000000022
228.296	67.3237	12.8486	3	1000000023
221.628	80.5017	12.1999	3	1000000024
252.132	92.6504	14.8141	3	1000000025
68.4036	128.826	14.2084	3	1000000026
18.1572	124.631	17.9909	3	1000000027
49.3184	104.484	18.6354	3	1000000028
67.448	169.675	22.1928	3	1000000029
87.2623	136.165	25.5503	3	1000000030
125.165	123.943	19.3826	3	1000000031
142.941	185.41	19.7336	3	1000000032
141.2	149.158	23.4904	3	1000000034
170.304	165.841	23.7511	3	1000000033
192.441	192.186	29.0203	3	1000000035
209.577	112.408	11.1046	3	1000000036
258.138	156.852	11.2077	3	1000000039
223.071	167.557	11.1035	3	1000000037
250.538	195.473	14.491	3	1000000040
221.62	127.39	18.4895	3	1000000041
257.732	150.546	18.4751	3	1000000038
236.142	170.511	25.1838	3	1000000042
42.8896	244.274	13.5775	3	1000000043
70.7991	206.254	17.3455	3	1000000044
47.9773	255.383	19.8304	3	1000000045
56.7557	241.587	24.654	3	1000000046
191.078	224.751	18.6663	3	1000000048
114.133	224.028	21.3078	3	1000000049
160.238	208.248	23.0587	3	1000000050
132.812	258.138	29.1186	3	1000000051
258.138	243.618	10.5	3	1000000053
220.808	222.805	15.794	3	1000000054
156.643	87.8589	45	3	1000000055
246.162	146.807	38.6038	3	1000000056
88.4494	214.987	32.0378	3	1000000047
179.06	247.532	33.5825	3	1000000052
103.21	232.446	45	3	1000000057
145.531	220.198	25	3	1000000095
56.2075	27.1823	7.80289	4	1000000000
28.8894	19.112	11.6012	4	1000000001
27.1415	83.8148	15.8843	4	1000000003
41.7253	58.7238	19.6064	4	1000000002
58.7987	86.2604	18.7017	4	1000000004
79.4169	94.2073	18.924	4	1000000005
45.9487	18.1284	22.2454	4	1000000006
71.4267	89.3911	28.5906	4	1000000007
103.88	22.9797	9.32817	4	1000000008
106.588	44.2596	12.8137	4	1000000011
164.028	80.1521	13.3333	4	1000000009
117.496	26.1831	16.5309	4	1000000010
124.117	93.124	17.1251	4	1000000012
174.195	89.5234	21.4294	4	1000000014
153.03	31.2156	23.0823	4	1000000015
192.501	65.4254	23.4832	4	1000000013
126.086	78.5554	25.7311	4	1000000017
141.947	66.3592	26.3325	4	1000000016
157.076	55.0833	31.5785	4	1000000018
233.001	29.8428	5.3517	4	1000000019
208.218	23.6494	11.4593	4	1000000020
217.751	58.7271	13.412	4	1000000021
250.523	63.2167	13.1332	4	1000000022
228.58	67.0541	13.2	4	1000000023
221.939	79.848	13.2773	4	1000000024
250.555	91.9835	15.2814	4	1000000025
68.1797	128.653	13.8688	4	1000000026
18.0276	123.179	17.2435	4	1000000027
47.8507	103.274	19.0255	4	1000000028
87.1559	135.213	23.8059	4	1000000030
67.3784	168.695	22.7725	4	1000000029
123.928	123.57	18.6432	4	1000000031
145.572	184.413	19.145	4	1000000032
141.234	147.655	23.8792	4	1000000034
168.728	164.279	25.0985	4	1000000033
192.049	191.643	28.3513	4	1000000035
207.905	115.186	11.0701	4	1000000036
258.138	155.214	11.2727	4	1000000039
221.36	167.417	11.3865	4	1000000037
250.856	192.479	14.4505	4	1000000040
255.487	150.83	17.7077	4	1000000038
221.268	126.312	19.8444	4	1000000041
236.562	168.667	24.102	4	1000000042
42.7207	242.452	13.9572	4	1000000043
70.4873	206.391	17.3088	4	1000000044
72.9098	258.138	16.6884	4	1000000058
48.4532	254.578	20.7494	4	1000000045
56.2872	238.55	24.2357	4	1000000046
90.3543	217.166	31.4864	4	1000000047
191.739	224.512	18.5342	4	1000000048
159.58	208.456	22.6527	4	1000000050
112.583	226.133	25.3471	4	1000000049
136.17	256.486	28.8972	4	1000000051
256.675	241.294	12.2114	4	1000000053
220.08	222.927	15.6906	4	1000000054
247.515	145.189	38.0959	4	1000000056
101.27	231.639	45	4	1000000057
178.691	245.954	33.603	4	1000000052
142.593	221.772	25	4	1000000095
56.9386	25.9467	6.72987	5	1000000000
28.3187	19.3046	11.0716	5	1000000001
26.6899	84.062	15.2034	5	1000000003
58.2135	87.1723	18.2502	5	1000000004
43.35	18.0568	21.8248	5	1000000006
45.9171	58.6731	20.6421	5	1000000002
82.4675	90.7633	20.7357	5	1000000005
70.9121	89.3066	27.6445	5	1000000007
104.611	22.0904	10.0452	5	1000000008
163.509	78.3077	11.6772	5	1000000009
108.049	46.6709	13.1106	5	1000000011
126.721	92.7351	16.9032	5	1000000012
118.324	26.7207	18.3721	5	1000000010
150.682	30.8985	21.1058	5	1000000015
192.856	64.486	21.6909	5	1000000013
173.712	89.114	21.0685	5	1000000014
139.94	69.5794	25.963	5	1000000016
125.411	77.6787	24.3661	5	1000000017
156.387	54.7261	30.473	5	1000000018
233.753	28.1363	5.70664	5	1000000019
210.222	23.5761	9.40191	5	1000000020
217.162	57.1485	13.3796	5	1000000021
249.539	61.2816	12.1725	5	1000000022
226.329	65.7987	12.8563	5	1000000023
220.484	78.7004	12.4069	5	1000000024
250.78	90.3969	14.9816	5	1000000025
68.3093	128.392	12.5232	5	1000000026
47.8328	103.926	18.4499	5	1000000028
18.7353	122.397	19.1554	5	1000000027
85.5945	135.439	23.3072	5	1000000030
66.3533	169.071	22.8759	5	1000000029
124.113	121.922	18.7483	5	1000000031
147.683	183.993	20.1575	5	1000000032
141.226	147.888	22.5465	5	1000000034
169.736	163.188	25.2235	5	1000000033
189.477	190.701	27.1603	5	1000000035
258.138	153.932	9.75461	5	1000000039
207.694	115.732	11.4103	5	1000000036
221.449	167.267	11.322	5	1000000037
250.497	190.492	14.218	5	1000000040
253.608	149.267	19.2442	5	1000000038
220.685	124.809	21.074	5	1000000041
237.738	165.933	23.5769	5	1000000042
42.7593	240.277	12.8339	5	1000000043
72.0618	258.138	15.1837	5	1000000058
69.4422	206.608	17.7979	5	1000000044
44.6248	252.869	17.1141	5	1000000045
57.8612	238.306	21.2608	5	1000000046
193.159	226.001	18.72	5	1000000048
158.17	209.055	23.6525	5	1000000050
111.928	226.886	27.2482	5	1000000049
138.128	257.541	26.1316	5	1000000051
219.254	222.606	15.1577	5	1000000054
254.073	242.924	14.4205	5	1000000053
153.326	87.3339	45	5	1000000055
248.187	142.454	38.5595	5	1000000056
89.2081	217.106	33.4428	5	1000000047
98.0668	233.417	45	5	1000000057
178.4	246.2	33.6079	5	1000000052
142.354	218.86	25	5	1000000095
56.9475	24.5213	6.11029	6	1000000000
26.8679	19.3175	11.9948	6	1000000001
26.4889	83.8619	14.3515	6	1000000003
56.3545	87.3832	18.71	6	1000000004
41.0807	15.0902	21.6297	6	1000000006
47.863	57.7217	20.1342	6	1000000002
81.9377	87.9061	21.5219	6	1000000005
70.5302	89.2438	29.6145	6	1000000007
104.564	22.4148	10.014	6	1000000008
109.096	48.1926	11.6178	6	1000000011
163.64	76.5546	11.4057	6	1000000009
125.994	90.3593	15.5628	6	1000000012
116.469	26.6599	18.7416	6	1000000010
148.243	30.2766	19.9133	6	1000000015
173.517	88.2357	21.9281	6	1000000014
191.391	62.3775	23.3925	6	1000000013
122.015	77.2358	23.211	6	1000000017
135.607	72.3321	27.0366	6	1000000016
156.376	52.5535	31.6639	6	1000000018
232.613	25.6364	6.38611	6	1000000019
209.548	24.3401	10.0017	6	1000000020
251.076	58.6132	11.5456	6	1000000022
224.979	65.3828	11.7319	6	1000000023
216.592	54.9741	12.7642	6	1000000021
220.011	78.7752	12.0331	6	1000000024
248.455	90.6208	14.7275	6	1000000025
69.5911	128.22	12.2623	6	1000000026
47.1024	105.78	17.2574	6	1000000028
17.3211	120.586	17.6708	6	1000000027
66.3556	167.199	20.617	6	1000000029
85.1287	132.923	22.1604	6	1000000030
123.967	121.353	19.2601	6	1000000031
149.841	183.988	21.3438	6	1000000032
140.179	147.08	22.3646	6	1000000034
170.152	161.816	26.7397	6	1000000033
188.877	189.562	27.2362	6	1000000035
131.86	140.197	29.9351	6	1000000059
207.949	115.614	11.4076	6	1000000036
258.138	151.65	11.0129	6	1000000039
221.33	166.165	11.3823	6	1000000037
251.88	189.98	13.6097	6	1000000040
219.607	124.381	21.5713	6	1000000041
253.143	147.107	20.4051	6	1000000038
237.363	161.02	23.2064	6	1000000042
40.3505	238.384	13.6029	6	1000000043
73.9918	258.138	13.0529	6	1000000058
44.7792	251.565	15.9586	6	1000000045
68.0079	204.745	19.493	6	1000000044
59.7802	239.253	20.3474	6	1000000046
194.183	226.249	19.1259	6	1000000048
158.45	207.881	24.4138	6	1000000050
138.811	258.138	25.1218	6	1000000051
109.375	223.523	28.1465	6	1000000049
219.267	222.828	14.8823	6	1000000054
252.593	241.966	14.2815	6	1000000053
152.18	85.6799	45	6	1000000055
249.101	139.154	39.2195	6	1000000056
88.9147	214.501	33.9917	6	1000000047
97.9263	236.209	45	6	1000000057
176.967	245.98	33.4159	6	1000000052
142.103	217.27	25	6	1000000095
57.2377	24.9216	6.79606	7	1000000000
26.4426	19.7867	12.6745	7	1000000001
27.6889	84.4786	15.2658	7	1000000003
48.8288	56.8832	18.5634	7	1000000002
95.6568	63.8841	19.8662	7	1000000060
57.1396	88.1577	18.8046	7	1000000004
38.0447	13.2332	21.975	7	1000000006
82.6462	86.8306	20.1428	7	1000000005
68.4408	89.0432	28.9334	7	1000000007
103.937	22.8586	9.23324	7	1000000008
110.368	50.4814	10.8793	7	1000000011
163.845	76.6758	10.5467	7	1000000009
126.805	89.6517	15.6188	7	1000000012
114.702	27.5536	19.0311	7	1000000010
146.517	31.4049	18.1338	7	1000000015
190.348	62.2828	23.4213	7	1000000013
121.61	76.8781	22.866	7	1000000017
173.281	86.2013	22.1805	7	1000000014
135.115	75.0166	29.3764	7	1000000016
231.056	21.8786	8.24965	7	1000000019
210.81	25.1676	9.77741	7	1000000020
249.923	54.8785	11.274	7	1000000022
215.826	54.3285	12.7052	7	1000000021
222.638	65.406	12.1992	7	1000000023
219.733	79.2192	12.3245	7	1000000024
247.751	88.0135	14.0912	7	1000000025
69.7717	127.939	12.3785	7	1000000026
46.0912	105.161	17.3327	7	1000000028
18.2714	116.351	18.7561	7	1000000027
83.3347	133.382	21.7883	7	1000000030
66.3984	168.561	21.4074	7	1000000029
123.975	121.548	19.206	7	1000000031
141.75	146.02	23.0144	7	1000000034
151.527	182.746	22.5157	7	1000000032
169.236	162.361	27.3668	7	1000000033
188.167	187.098	27.2462	7	1000000035
131.474	139.503	30.1704	7	1000000059
258.138	150.686	11.5062	7	1000000039
205.088	116.491	12.2744	7	1000000036
221.009	165.953	12.3073	7	1000000037
251.571	188.612	13.056	7	1000000040
251.023	145.529	21.798	7	1000000038
220.265	123.964	22.4041	7	1000000041
236.26	158.129	24.3438	7	1000000042
73.1105	258.138	11.1887	7	1000000058
36.2614	235.211	13.6305	7	1000000043
44.3883	250.664	12.5266	7	1000000045
66.8495	204.984	19.3221	7	1000000044
60.8049	239.354	19.1668	7	1000000046
85.9074	211.583	31.1544	7	1000000047
195.539	227.142	19.1573	7	1000000048
158.786	205.139	25.3412	7	1000000050
136.861	258.138	26.3929	7	1000000051
109.85	220.646	28.8205	7	1000000049
219.375	222.675	14.6702	7	1000000054
250.463	240.15	14.6428	7	1000000053
156.312	50.7627	33.5357	7	1000000018
152.749	83.8785	45	7	1000000055
249.587	136.305	41.1129	7	1000000056
96.2183	237.348	43.9029	7	1000000057
175.123	245.414	32.8018	7	1000000052
139.454	216.199	25	7	1000000095
56.3834	25.7251	6.52952	8	1000000000
25.322	20.6852	13.3359	8	1000000001
27.5315	83.8044	15.4749	8	1000000003
51.3072	57.4067	18.6706	8	1000000002
94.3127	64.122	19.5585	8	1000000060
55.7604	88.8561	19.1921	8	1000000004
80.191	88.4106	19.0505	8	1000000005
36.3596	11.894	21.3357	8	1000000006
66.9965	89.2916	29.6423	8	1000000007
102.913	22.2631	8.9354	8	1000000008
109.971	51.6151	10.3526	8	1000000011
162.679	76.7856	10.5142	8	1000000009
127.404	89.2264	14.9012	8	1000000012
144.636	28.8675	16.3169	8	1000000015
114.984	28.7679	18.5548	8	1000000010
191.095	60.9814	22.923	8	1000000013
120.017	75.8428	22.176	8	1000000017
172.851	84.1801	22.5193	8	1000000014
136.222	74.268	30.436	8	1000000016
230.512	21.0352	8.92305	8	1000000019
209.701	25.9125	9.91098	8	1000000020
249.364	56.1312	10.9014	8	1000000022
214.454	52.6883	13.5481	8	1000000021
220.918	64.8924	12.456	8	1000000023
220.5	78.2473	12.2002	8	1000000024
246.73	86.3938	13.5077	8	1000000025
68.9034	127.617	11.2075	8	1000000026
45.5671	104.284	17.1244	8	1000000028
20.9258	112.132	18.8765	8	1000000027
64.985	167.186	19.2903	8	1000000029
83.8767	132.938	20.9492	8	1000000030
65.7463	201.758	20.4599	8	1000000044
202.885	116.456	12.6939	8	1000000036
124.592	119.459	19.1186	8	1000000031
141.519	144.88	22.4341	8	1000000034
151.482	183.11	23.5681	8	1000000032
155.563	202.441	24.2545	8	1000000050
167.496	162.084	27.812	8	1000000033
188.034	186.162	26.2383	8	1000000035
130.505	139.056	30.5386	8	1000000059
220.732	165.389	11.8778	8	1000000037
258.138	148.292	12.121	8	1000000039
252.741	188.72	12.4993	8	1000000040
250.588	142.819	21.6353	8	1000000038
221.784	120.848	23.2998	8	1000000041
235.422	157.21	23.5965	8	1000000042
72.5911	258.138	10.3855	8	1000000058
45.3928	249.446	12.9856	8	1000000045
35.4418	232.668	14.9484	8	1000000043
58.9095	236.102	19.2286	8	1000000046
83.2783	207.551	25.6182	8	1000000047
197.713	227.05	20.7842	8	1000000048
137.896	258.138	25.9062	8	1000000051
111.325	219.91	27.0075	8	1000000049
173.964	246.332	31.7563	8	1000000052
249.823	239.252	13.4176	8	1000000053
217.632	223.048	14.8959	8	1000000054
156.888	50.8278	35.0922	8	1000000018
151.481	83.6358	45	8	1000000055
248.229	134.659	40.7421	8	1000000056
94.1854	236.493	41.3845	8	1000000057
139.449	216.728	25	8	1000000095
55.0419	24.4213	7.22879	9	1000000000
25.5719	20.4201	13.3699	9	1000000001
28.4749	82.7932	16.3725	9	1000000003
35.9778	8.80501	19.6262	9	1000000006
52.5327	57.6105	19.4041	9	1000000002
80.959	90.3554	19.5396	9	1000000005
94.5884	62.6468	20.4756	9	1000000060
56.1496	87.6741	20.2285	9	1000000004
68.1815	87.1276	30.8917	9	1000000007
103.254	21.2803	8.98557	9	1000000008
161.378	76.7561	9.44181	9	1000000009
108.519	51.1054	10.3276	9	1000000011
145.427	29.2138	15.8962	9	1000000015
128.48	88.0906	14.472	9	1000000012
115.234	27.6894	19.0018	9	1000000010
119.814	72.1062	22.1473	9	1000000017
174.554	81.3965	22.7078	9	1000000014
190.024	60.1591	24.1409	9	1000000013
136.169	72.1351	30.7344	9	1000000016
230.947	19.6535	9.43732	9	1000000019
208.3	26.7306	10.8194	9	1000000020
250.429	55.2932	10.5005	9	1000000022
220.405	77.5289	11.6407	9	1000000024
214.004	48.9653	13.5137	9	1000000021
218.998	64.0313	13.7896	9	1000000023
246.684	83.7962	12.5518	9	1000000025
68.1909	126.675	10.3811	9	1000000026
47.783	102.39	15.6819	9	1000000028
22.1727	109.605	17.6205	9	1000000027
83.018	134.974	21.1765	9	1000000030
63.0401	167.684	21.0869	9	1000000029
65.5132	199.141	21.3274	9	1000000044
201.287	114.954	13.344	9	1000000036
123.732	118.898	19.0911	9	1000000031
139.459	144.646	21.9233	9	1000000034
152.087	182.495	24.479	9	1000000032
152.73	197.686	24.7912	9	1000000050
189.245	185.5	27.3881	9	1000000035
127.515	139.196	29.0284	9	1000000059
166.74	160.402	28.1869	9	1000000033
258.138	147.963	11.5407	9	1000000039
219.645	164.842	11.1116	9	1000000037
253.271	188.603	12.8091	9	1000000040
250.853	140.706	21.4216	9	1000000038
220.732	121.525	23.013	9	1000000041
235.436	154.223	23.0059	9	1000000042
68.8445	255.913	10.6646	9	1000000058
34.7519	230.848	14.7469	9	1000000043
43.3805	247.425	14.2813	9	1000000045
55.1243	236.05	20.8515	9	1000000046
82.9687	204.832	23.6245	9	1000000047
197.198	227.739	20.6835	9	1000000048
111.991	219.842	27.2469	9	1000000049
138.047	258.138	26.9545	9	1000000051
171.583	244.287	30.8331	9	1000000052
249.888	237.11	13.2949	9	1000000053
216.814	223.371	15.3042	9	1000000054
155.459	50.54	36.8631	9	1000000018
150.913	83.3791	45	9	1000000055
248.762	135.299	41.547	9	1000000056
92.0293	236.723	41.9501	9	1000000057
137.374	215.569	23	9	1000000095
55.4169	23.1905	7.80148	10	1000000000
25.8512	21.0934	13.8577	10	1000000001
29.2212	82.1743	16.6979	10	1000000003
48.9545	101.409	16.3054	10	1000000028
36.1559	6.85098	18.9934	10	1000000006
55.8778	57.7164	19.6991	10	1000000002
94.7263	62.4655	19.7344	10	1000000060
56.4794	87.2521	18.599	10	1000000004
79.8766	90.9006	19.0934	10	1000000005
103.709	20.441	8.70169	10	1000000008
160.28	77.6698	9.1003	10	1000000009
108.193	52.1446	10.2598	10	1000000011
130.007	89.5377	13.6588	10	1000000012
146.949	28.7387	16.0349	10	1000000015
114.863	26.1327	18.2122	10	1000000010
114.206	70.6022	19.1652	10	1000000017
176.744	77.2922	21.8284	10	1000000014
190.699	58.1252	24.8629	10	1000000013
133.676	72.4248	30.9576	10	1000000016
229.216	17.8171	11.1004	10	1000000019
250.212	56.4065	10.4198	10	1000000022
221.682	77.6236	10.6405	10	1000000024
206.727	25.9096	12.5784	10	1000000020
211.874	49.3641	12.4443	10	1000000021
216.844	62.3773	12.7903	10	1000000023
245.783	83.1609	13.1277	10	1000000025
67.0729	126.114	9.48117	10	1000000026
23.9205	107.951	17.2481	10	1000000027
81.8816	136.466	21.0593	10	1000000030
83.2289	201.096	21.7426	10	1000000047
65.4688	197.705	22.1015	10	1000000044
199.47	113.835	13.5378	10	1000000036
124.171	116.673	20.5658	10	1000000031
138.222	144.737	22.543	10	1000000034
151.883	181.302	25.5211	10	1000000032
152.302	195.413	24.7847	10	1000000050
124.145	138.545	28.7081	10	1000000059
166.159	160.575	28.6774	10	1000000033
188.305	185.783	28.2081	10	1000000035
258.138	147.471	11.224	10	1000000039
219.6	164.394	10.2838	10	1000000037
254.294	189.281	11.4005	10	1000000040
218.27	121.078	21.7364	10	1000000041
249.343	138.577	20.3723	10	1000000038
236.649	153.935	23.4491	10	1000000042
67.023	255.277	9.24257	10	1000000058
41.6564	246.61	13.2541	10	1000000045
33.8076	231.65	15.5151	10	1000000043
54.0116	234.279	21.5565	10	1000000046
197.7	229.506	20.3676	10	1000000048
113.247	219.057	29.0651	10	1000000049
138.416	258.138	28.6178	10	1000000051
169.831	242.986	30.0587	10	1000000052
249.363	235.879	12.9144	10	1000000053
217.086	222.617	15.5187	10	1000000054
69.6382	86.3545	32.1775	10	1000000007
153.455	49.9623	37.8781	10	1000000018
148.401	83.242	43.4847	10	1000000055
227.691	127.996	36.4882	10	1000000061
247.907	133.976	41.4527	10	1000000056
89.7002	235.207	40.9205	10	1000000057
67.8972	169.412	18.6154	10	1000000029
133.901	215.287	23	10	1000000095
54.9929	24.1782	8.1582	11	1000000000
25.6704	22.1148	13.8614	11	1000000001
28.1158	80.3626	16.0206	11	1000000003
58.1422	89.6387	17.7161	11	1000000004
50.9562	101.512	17.3362	11	1000000028
36.301	4.3525	18.334	11	1000000006
91.2072	59.7157	19.6982	11	1000000060
79.1958	90.4683	18.8128	11	1000000005
58.2612	58.7884	21.1928	11	1000000002
69.5024	86.1819	31.6457	11	1000000007
102.816	20.0323	8.45864	11	1000000008
158.651	76.9797	9.68674	11	1000000009
106.971	52.6758	10.6134	11	1000000011
145.988	30.3971	15.5779	11	1000000015
130.007	91.714	14.071	11	1000000012
114.613	23.8723	16.8324	11	1000000010
111.717	68.9755	17.3762	11	1000000017
175.248	74.7933	21.281	11	1000000014
189.28	56.356	25.7107	11	1000000013
129.186	70.5306	31.6575	11	1000000016
249.771	55.2063	9.12689	11	1000000022
223.694	75.7883	9.8725	11	1000000024
229.158	16.6295	11.0123	11	1000000019
211.272	47.9919	10.7305	11	1000000021
205.871	24.6911	12.1961	11	1000000020
242.776	83.1475	13.4832	11	1000000025
214.239	60.5279	14.1041	11	1000000023
67.0823	124.895	9.666	11	1000000026
31.4334	107.181	14.6301	11	1000000062
63.472	164.63	19.1749	11	1000000029
81.3777	134.906	20.8328	11	1000000030
83.7065	197.794	21.1271	11	1000000047
23.9114	107.835	22.2958	11	1000000027
63.6457	196.282	22.3099	11	1000000044
196.167	110.872	13.5719	11	1000000036
122.501	117.61	19.5834	11	1000000031
138.688	143.175	23.8299	11	1000000034
151.832	182.466	24.9632	11	1000000032
150.616	195.98	25.4691	11	1000000050
120.737	136.605	29.4094	11	1000000059
166.901	161.018	29.7122	11	1000000033
186.948	187.359	29.1423	11	1000000035
258.138	146.656	10.7521	11	1000000039
219.337	164.836	10.1681	11	1000000037
253.984	189.39	12.385	11	1000000040
248.498	136.532	19.5215	11	1000000038
215.21	118.062	21.8085	11	1000000041
238.454	152.376	23.7425	11	1000000042
67.642	257.462	9.53154	11	1000000058
40.8993	247.156	11.5353	11	1000000045
32.2855	232.174	15.2355	11	1000000043
52.8799	232.557	22.7877	11	1000000046
198.405	230.387	20.1048	11	1000000048
111.952	221.027	29.1897	11	1000000049
138.397	258.138	29.0909	11	1000000051
167.788	240.32	31.0441	11	1000000052
248.076	233.565	13.2362	11	1000000053
216.287	224.36	15.2263	11	1000000054
151.734	49.1802	38.6125	11	1000000018
145.528	82.2308	43.3897	11	1000000055
226.466	127.674	38.2515	11	1000000061
246.955	132.321	40.6779	11	1000000056
88.7496	233.297	40.7181	11	1000000057
132.299	213.251	25	11	1000000095
101.541	18.7803	7.27401	12	1000000008
56.392	23.8123	8.75444	12	1000000000
25.8213	21.461	14.206	12	1000000001
26.1205	76.634	15.7834	12	1000000003
57.0759	90.5303	17.5212	12	1000000004
80.0512	90.3899	17.5762	12	1000000005
36.8668	3.47335	18.587	12	1000000006
92.7709	58.3727	19.0317	12	1000000060
55.4575	99.9921	18.7357	12	1000000028
59.181	58.4872	21.7501	12	1000000002
105.491	52.317	11.7855	12	1000000011
155.734	77.3826	10.6603	12	1000000009
112.63	22.1321	15.5826	12	1000000010
144.93	29.8502	15.0945	12	1000000015
130.141	92.6809	14.9437	12	1000000012
111.252	67.3587	16.9202	12	1000000017
176.282	73.0457	20.7897	12	1000000014
188.291	54.8116	24.7365	12	1000000013
127.646	67.053	29.5533	12	1000000016
251.161	56.9453	7.44963	12	1000000022
205.964	24.2737	9.23242	12	1000000020
230.307	15.655	10.4511	12	1000000019
209.323	46.1042	11.3716	12	1000000021
224.99	76.9761	10.1676	12	1000000024
239.218	82.9007	13.4658	12	1000000025
212.071	56.8119	16.6744	12	1000000023
68.112	123.339	9.46419	12	1000000026
36.1041	106.896	16.1111	12	1000000062
80.6957	134.034	19.87	12	1000000030
64.965	162.877	19.2893	12	1000000029
25.4143	106.389	22.3177	12	1000000027
63.6	193.658	22.4617	12	1000000044
82.6792	194.362	22.2199	12	1000000047
194.42	109.488	14.5475	12	1000000036
122.613	116.682	19.0689	12	1000000031
140.404	142.409	24.4863	12	1000000034
150.903	181.99	25.1795	12	1000000032
149.633	195.476	26.4237	12	1000000050
120.565	134.53	29.2901	12	1000000059
186.299	190.094	28.3832	12	1000000035
166.36	160.074	30.1346	12	1000000033
258.138	121.516	9.38355	12	1000000063
254.666	145.352	10.642	12	1000000039
220.327	165.371	10.1715	12	1000000037
253.924	187.189	12.6996	12	1000000040
247.48	135.279	18.7676	12	1000000038
212.952	115.455	20.3114	12	1000000041
238.768	151.714	23.2481	12	1000000042
258.138	107.514	28.5859	12	1000000064
68.5449	257.372	8.79216	12	1000000058
40.3101	246.704	10.658	12	1000000045
31.7923	231.24	14.1047	12	1000000043
50.3185	233.13	23.4389	12	1000000046
197.821	231.453	19.0148	12	1000000048
112.063	221.724	29.3024	12	1000000049
138.208	258.138	28.4984	12	1000000051
166.386	238.452	30.83	12	1000000052
215.822	225.483	14.7314	12	1000000054
249.209	232.516	14.1751	12	1000000053
69.4371	83.5467	32.3664	12	1000000007
150.217	50.3907	39.1796	12	1000000018
143.498	81.0474	45	12	1000000055
225.988	126.801	38.0723	12	1000000061
243.935	130.206	38.513	12	1000000056
87.6549	233.721	39.8026	12	1000000057
128.846	212.805	27	12	1000000095
101.232	18.4667	8.09398	13	1000000008
55.8991	24.5442	9.01795	13	1000000000
25.0278	24.1035	14.1167	13	1000000001
24.4236	74.3841	14.6882	13	1000000003
39.2607	3.69272	16.4259	13	1000000006
90.273	57.302	17.3197	13	1000000060
55.3939	91.3116	17.5504	13	1000000004
79.0263	86.9621	18.1917	13	1000000005
57.724	99.3951	19.6621	13	1000000028
59.8305	57.8223	20.0108	13	1000000002
97.2606	96.4835	26.1976	13	1000000065
68.0583	78.6666	30.8811	13	1000000007
155.17	77.9909	11.4852	13	1000000009
144.702	30.3889	12.7964	13	1000000015
104.605	52.5187	12.5438	13	1000000011
111.912	21.0479	15.2967	13	1000000010
130.242	93.6375	15.2358	13	1000000012
111.587	67.0966	16.6609	13	1000000017
176.174	72.6091	21.2968	13	1000000014
186.972	54.6039	24.911	13	1000000013
126.844	65.9032	29.1593	13	1000000016
250.989	54.8408	6.35897	13	1000000022
229.078	14.7407	9.58233	13	1000000019
206.067	25.0892	9.00833	13	1000000020
226.111	74.3718	9.58697	13	1000000024
210.632	45.2484	11.4909	13	1000000021
236.431	84.0029	12.2925	13	1000000025
209.276	55.008	17.0793	13	1000000023
67.5893	122.796	8.28512	13	1000000026
39.1766	106.556	17.5124	13	1000000062
78.7024	134.232	18.9003	13	1000000030
63.3374	162.691	19.0952	13	1000000029
26.7016	105.595	21.8216	13	1000000027
60.9913	193.735	22.4702	13	1000000044
81.7574	193.468	23.1856	13	1000000047
193.759	108.706	15.1173	13	1000000036
122.151	116.54	19.3076	13	1000000031
142.84	141.121	23.5031	13	1000000034
151.947	183.505	24.6629	13	1000000032
148.136	194.383	25.2147	13	1000000050
185.337	190.218	27.3209	13	1000000035
120.916	133.976	28.6032	13	1000000059
165.409	158.922	29.8753	13	1000000033
258.138	120.861	7.66726	13	1000000063
220.999	166.214	9.4594	13	1000000037
254.575	145.136	11.2455	13	1000000039
254.133	185.228	11.5891	13	1000000040
210.844	115.085	19.445	13	1000000041
244.455	134.109	18.4307	13	1000000038
238.525	152.22	21.1777	13	1000000042
258.138	107.522	28.3623	13	1000000064
68.6397	251.704	8.57218	13	1000000058
39.6485	245.684	10.2285	13	1000000045
33.3911	230.179	14.2672	13	1000000043
50.7272	236.243	22.1495	13	1000000046
197.863	233.162	18.4239	13	1000000048
142.249	258.138	27.0246	13	1000000051
109.599	221.766	28.7331	13	1000000049
165.798	238.353	31.0007	13	1000000052
216.904	225.239	14.73	13	1000000054
249.142	232.643	14.3068	13	1000000053
209.456	258.138	22.8843	13	1000000066
148.352	52.8417	40.7371	13	1000000018
142.035	80.7918	45	13	1000000055
223.194	124.494	38.5222	13	1000000061
243.43	126.518	39.0363	13	1000000056
84.8231	235.361	40.8577	13	1000000057
126.471	211.738	27	13	1000000095
99.5812	18.6784	8.36325	14	1000000008
56.5848	23.0372	8.63293	14	1000000000
101.628	52.0981	13.3589	14	1000000011
43.3538	4.66563	14.0061	14	1000000006
23.3511	26.0683	14.57	14	1000000001
89.2736	58.5373	15.6162	14	1000000060
24.0225	74.1755	14.5833	14	1000000003
76.9448	84.7919	17.0101	14	1000000005
54.3629	89.9439	18.2788	14	1000000004
60.3334	99.1762	18.2957	14	1000000028
57.6857	56.3132	20.3881	14	1000000002
97.8466	95.65	22.7666	14	1000000065
68.8731	75.8016	30.6988	14	1000000007
153.084	77.4749	11.2954	14	1000000009
143.702	30.053	12.1818	14	1000000015
111.871	22.6613	14.9341	14	1000000010
111.96	66.1572	14.5908	14	1000000017
130.977	92.7295	15.2496	14	1000000012
177.758	69.5336	19.5528	14	1000000014
125.326	65.0278	24.4046	14	1000000016
188.388	53.1253	26.276	14	1000000013
252.388	54.4845	4.81929	14	1000000022
228.59	15.7077	9.13485	14	1000000019
207.252	24.9321	8.97673	14	1000000020
227.875	72.8216	9.56513	14	1000000024
211.422	45.875	10.2707	14	1000000021
235.127	82.4902	10.0084	14	1000000025
206.468	54.1869	16.7783	14	1000000023
65.7932	123.953	9.27256	14	1000000026
39.833	106.666	17.4092	14	1000000062
62.3386	161.924	17.4302	14	1000000029
23.7641	103.815	19.9834	14	1000000027
77.2945	133.745	18.8783	14	1000000030
81.1753	192.177	22.4466	14	1000000047
59.4283	193.87	23.6382	14	1000000044
192.422	108.818	14.986	14	1000000036
122.568	115.929	18.9317	14	1000000031
143.165	140.877	24.1241	14	1000000034
153.931	184.644	24.2219	14	1000000032
149.046	194.979	25.5033	14	1000000050
120.722	133.661	27.3176	14	1000000059
184.272	188.46	27.0335	14	1000000035
163.838	158.461	31.1123	14	1000000033
221.717	167.656	9.91993	14	1000000037
254.097	145.284	10.741	14	1000000039
254.337	185.928	11.106	14	1000000040
210.873	116.396	16.8535	14	1000000041
241.412	132.872	16.6702	14	1000000038
258.138	106.788	30.4949	14	1000000064
36.3297	247.119	9.77274	14	1000000045
67.2218	246.983	8.4107	14	1000000058
32.4275	229.922	13.0704	14	1000000043
46.1924	236.329	23.5643	14	1000000046
199.113	233.77	18.9807	14	1000000048
110.282	223.01	27.7125	14	1000000049
146.945	258.138	27.4561	14	1000000051
166.449	238.178	30.5855	14	1000000052
217.69	225.043	15.1701	14	1000000054
249.498	232.538	14.1362	14	1000000053
209.089	258.138	23.1456	14	1000000066
146.243	56.6443	41.5291	14	1000000018
140.079	80.7187	43.3813	14	1000000055
220.706	122.262	38.6861	14	1000000061
244.27	123.595	38.15	14	1000000056
83.003	233.502	40.3209	14	1000000057
126.997	212.268	27	14	1000000095
100.245	19.3441	7.65033	15	1000000008
53.7906	22.8284	8.45068	15	1000000000
45.1699	3.21029	12.8045	15	1000000006
101.417	52.7846	13.8969	15	1000000011
22.0774	27.5806	14.6811	15	1000000001
88.1379	58.1642	14.5836	15	1000000060
24.5789	72.636	14.3956	15	1000000003
55.9699	54.5755	19.5991	15	1000000002
77.9289	83.3019	18.6043	15	1000000005
52.6118	89.9226	19.2811	15	1000000004
64.1364	99.9417	18.9182	15	1000000028
95.8431	96.3476	22.7326	15	1000000065
68.5932	75.3287	29.1879	15	1000000007
144.666	30.8551	11.6732	15	1000000015
150.976	77.1177	10.7601	15	1000000009
130.98	92.8785	12.0253	15	1000000012
113.309	24.6288	14.7895	15	1000000010
110.188	64.871	16.7251	15	1000000017
177.196	67.5257	18.2496	15	1000000014
123.264	64.4244	21.1443	15	1000000016
186.349	51.4722	25.4443	15	1000000013
251.739	54.7429	4.74579	15	1000000022
229.294	16.0636	9.44797	15	1000000019
208.083	24.8834	8.7262	15	1000000020
212.921	46.1111	8.51051	15	1000000021
234.014	79.9019	9.58421	15	1000000025
228.095	71.9595	11.1104	15	1000000024
205.954	50.7235	16.1415	15	1000000023
66.2378	123.442	9.21466	15	1000000026
61.4695	161.371	17.3413	15	1000000029
23.2437	102.716	19.6246	15	1000000027
38.2926	105.179	19.3722	15	1000000062
77.0042	134.063	18.6316	15	1000000030
79.9071	189.834	20.3615	15	1000000047
58.4384	194.592	23.4915	15	1000000044
192.054	107.292	15.0933	15	1000000036
121.469	114.852	18.6628	15	1000000031
144.651	139.356	22.5564	15	1000000034
155.323	186.413	22.8482	15	1000000032
119.449	131.269	25.9691	15	1000000059
149.023	196.24	25.6903	15	1000000050
183.261	186.042	27.2396	15	1000000035
253.046	145.702	11.2776	15	1000000039
222.051	169.07	10.4395	15	1000000037
253.921	187.093	11.5694	15	1000000040
210.263	116.95	16.179	15	1000000041
238.223	132.832	16.7958	15	1000000038
232.25	148.056	16.9817	15	1000000067
63.8927	243.308	7.5357	15	1000000058
32.7062	247.235	8.77715	15	1000000045
31.4978	226.965	11.6321	15	1000000043
44.5732	236.626	21.9273	15	1000000046
199.866	234.625	18.505	15	1000000048
107.876	224.798	27.2854	15	1000000049
145.43	258.138	27.0498	15	1000000051
165.676	235.135	29.2123	15	1000000052
216.572	225.415	15.3213	15	1000000054
249.405	231.558	14.335	15	1000000053
207.297	258.138	26.7657	15	1000000066
144.951	58.6454	41.2335	15	1000000018
137.994	81.8161	42.7715	15	1000000055
163.354	156.861	33.6385	15	1000000033
218.41	120.653	37.8121	15	1000000061
243.615	123.337	37.3717	15	1000000056
78.7401	232.714	38.1245	15	1000000057
86.4769	245.607	45	15	1000000068
239.662	258.138	36.63	15	1000000069
123.834	210.407	27	15	1000000095
100.206	19.7571	7.794	16	1000000008
54.0208	23.0735	9.35807	16	1000000000
101.443	53.6477	13.0083	16	1000000011
25.4838	74.1344	13.7845	16	1000000003
46.2989	3.47909	15.075	16	1000000006
87.8245	60.8892	14.2867	16	1000000060
20.2733	30.7012	17.0837	16	1000000001
56.4871	54.5235	17.959	16	1000000002
77.295	81.3208	18.4846	16	1000000005
49.263	90.2684	19.6667	16	1000000004
64.2575	98.7312	18.3821	16	1000000028
21.271	100.141	21.0321	16	1000000027
96.8955	96.771	22.8043	16	1000000065
68.0879	73.7368	29.5109	16	1000000007
149.028	76.628	10.737	16	1000000009
129.826	92.3741	11.7169	16	1000000012
143.382	30.1622	12.2726	16	1000000015
113.263	25.0633	14.5199	16	1000000010
107.905	64.5708	16.3816	16	1000000017
177.297	65.8745	17.3016	16	1000000014
123.257	62.1136	18.234	16	1000000016
184.974	51.5159	25.1668	16	1000000013
252.929	55.352	5.50616	16	1000000022
214.232	46.662	7.4427	16	1000000021
211.58	26.4202	8.40088	16	1000000020
232.224	79.0934	9.80867	16	1000000025
229.461	15.4259	10.3478	16	1000000019
227.347	69.7779	12.3773	16	1000000024
204.941	49.9924	15.2583	16	1000000023
258.138	100.85	29.9552	16	1000000064
65.7411	123.957	9.5924	16	1000000026
78.0747	133.82	17.7883	16	1000000030
60.1683	162.84	17.3413	16	1000000029
79.9797	190.169	17.5395	16	1000000047
37.0374	104.91	18.8549	16	1000000062
56.4045	191.991	21.8045	16	1000000044
188.969	107.865	15.3758	16	1000000036
121.923	112.835	18.7731	16	1000000031
145.996	134.92	21.5243	16	1000000034
118.035	129.615	25.7396	16	1000000059
147.624	143.894	25.7523	16	1000000070
155.25	186.087	24.9955	16	1000000032
148.373	195.808	25.6626	16	1000000050
184.659	184.869	27.099	16	1000000035
258.138	121.207	8.0404	16	1000000063
222.534	169.009	10.5759	16	1000000037
252.191	187.899	11.5341	16	1000000040
251.487	144.456	12.6012	16	1000000039
211.567	117.496	15.3836	16	1000000041
232.479	145.161	15.2637	16	1000000067
237.591	130.935	17.5449	16	1000000038
64.4193	239.883	7.78089	16	1000000058
31.0382	224.843	9.41588	16	1000000043
32.5718	244.692	9.05566	16	1000000045
44.5147	235.486	20.9872	16	1000000046
199.989	233.691	18.4443	16	1000000048
108.626	223.795	26.3319	16	1000000049
142.744	256.51	26.2374	16	1000000051
166.202	234.81	30.4383	16	1000000052
248.716	231.389	13.7578	16	1000000053
216.609	225.292	15.4289	16	1000000054
205.793	258.138	29.9156	16	1000000066
145.63	63.1349	37.0116	16	1000000018
136.243	83.3762	40.7056	16	1000000055
162.159	155.348	34.9659	16	1000000033
217.381	119.532	35.8013	16	1000000061
244.604	122.783	36.7998	16	1000000056
75.3066	232.169	38.6271	16	1000000057
87.0496	244.659	45	16	1000000068
240.085	258.138	35.4017	16	1000000069
124.897	209.885	27	16	1000000095
100.576	19.3608	8.47292	17	1000000008
56.6623	22.0245	9.48692	17	1000000000
24.6217	73.0041	12.8263	17	1000000003
44.2543	1.34618	14.9849	17	1000000006
87.2452	60.7491	14.2991	17	1000000060
18.8694	31.9936	16.2617	17	1000000001
54.544	56.6084	16.931	17	1000000002
77.6567	79.3094	16.9298	17	1000000005
43.187	90.9624	18.9431	17	1000000004
63.5763	98.1597	19.5443	17	1000000028
96.6013	94.5228	21.3219	17	1000000065
21.1845	99.2203	20.4964	17	1000000027
66.2128	71.2223	30.5218	17	1000000007
102.973	53.3973	11.4045	17	1000000011
146.833	77.6291	10.4133	17	1000000009
130.024	92.7473	11.6483	17	1000000012
142.386	29.471	12.3153	17	1000000015
113.165	25.9238	14.6686	17	1000000010
107.737	63.49	14.3533	17	1000000017
119.87	60.3033	17.6823	17	1000000016
180.817	67.5143	19.2824	17	1000000014
184.641	50.8327	24.6347	17	1000000013
215.623	46.5573	6.98711	17	1000000021
253.497	56.117	7.0296	17	1000000022
214.199	27.4461	8.4657	17	1000000020
231.686	15.8399	11.7217	17	1000000019
230.906	79.6087	10.6579	17	1000000025
227.937	69.5353	13.7468	17	1000000024
203.969	47.1801	16.059	17	1000000023
258.138	97.0118	29.5658	17	1000000064
66.2644	123.502	9.50232	17	1000000026
79.4226	191.475	15.0577	17	1000000047
57.5178	162.419	16.5389	17	1000000029
37.788	103.323	19.0996	17	1000000062
80.7835	135.385	18.4059	17	1000000030
55.6522	191.93	21.9061	17	1000000044
186.424	107.818	17.8354	17	1000000036
119.875	112.02	18.8244	17	1000000031
147.836	134.246	18.9462	17	1000000034
151.65	146.681	22.7932	17	1000000070
154.865	186.67	23.3074	17	1000000032
117.366	130.247	24.9652	17	1000000059
183.978	183.64	25.9598	17	1000000035
149.312	194.539	25.4111	17	1000000050
258.138	120.671	7.96864	17	1000000063
222.571	168.999	10.492	17	1000000037
251.622	188.044	10.7402	17	1000000040
247.917	143.271	13.287	17	1000000039
213.138	117.583	15.4403	17	1000000041
232.83	144.365	15.5103	17	1000000067
237.339	130.139	17.0542	17	1000000038
213.764	200.382	26.9429	17	1000000071
30.6792	223.049	8.43204	17	1000000043
62.0978	236.572	8.71871	17	1000000058
32.6453	241.99	8.09071	17	1000000045
89.2219	246.152	16.713	17	1000000072
44.06	235.926	19.7851	17	1000000046
198.95	231.619	19.0697	17	1000000048
106.27	224.325	25.6535	17	1000000049
140.942	254.24	26.1581	17	1000000051
166.67	232.853	31.1601	17	1000000052
248.498	231.682	13.8595	17	1000000053
217.421	225.128	15.0158	17	1000000054
204.55	258.138	29.7235	17	1000000066
145.769	64.0733	35.5162	17	1000000018
133.858	81.5651	39.3088	17	1000000055
161.291	153.865	34.6049	17	1000000033
244.511	120.947	35.8721	17	1000000056
215.433	118.368	36.8829	17	1000000061
73.77	229.992	38.6596	17	1000000057
89.1828	244.378	45	17	1000000068
241.549	258.138	32.4998	17	1000000069
123.278	209.762	25	17	1000000095
100.567	19.6225	6.75022	18	1000000008
55.0907	21.6998	8.84466	18	1000000000
88.2488	60.7308	11.7817	18	1000000060
23.9647	71.777	13.0981	18	1000000003
43.7591	0.397748	14.8027	18	1000000006
18.2058	30.7122	17.6686	18	1000000001
51.7628	59.8514	16.8305	18	1000000002
77.3517	77.2067	16.824	18	1000000005
40.2785	91.0324	17.5774	18	1000000004
61.097	95.6295	20.9699	18	1000000028
20.9481	97.4706	21.0829	18	1000000027
93.8877	94.0067	22.4729	18	1000000065
66.6666	70.6627	28.6213	18	1000000007
146.302	77.375	9.04048	18	1000000009
112.1	27.0965	11.2774	18	1000000010
105.387	54.6454	10.2207	18	1000000011
143.155	29.5868	12.9523	18	1000000015
110.921	64.4655	13.2542	18	1000000017
131.557	93.3272	12.0042	18	1000000012
120.46	61.8882	16.7578	18	1000000016
182.174	69.1888	19.2879	18	1000000014
182.238	49.7812	24.1948	18	1000000013
252.705	56.0116	5.23874	18	1000000022
217.981	46.0162	6.55366	18	1000000021
214.609	27.2711	8.54165	18	1000000020
228.779	78.0758	9.57725	18	1000000025
231.579	14.9005	10.2118	18	1000000019
206.323	44.083	15.4696	18	1000000023
227.498	66.8455	14.6573	18	1000000024
255.081	94.5323	30.861	18	1000000064
66.3258	122.547	9.31569	18	1000000026
77.8952	192.035	14.0613	18	1000000047
36.7129	102.38	17.5957	18	1000000062
83.533	133.378	16.9337	18	1000000030
55.4833	162.748	17.6043	18	1000000029
54.6719	192.152	22.7823	18	1000000044
182.937	102.35	18.9073	18	1000000036
119.108	110.456	18.7796	18	1000000031
147.839	134.255	18.0617	18	1000000034
150.981	146.471	22.9078	18	1000000070
116.828	129.674	24.9527	18	1000000059
182.944	180.19	25.0086	18	1000000035
155.184	186.062	24.74	18	1000000032
149.503	194.525	25.074	18	1000000050
258.138	121.126	8.43404	18	1000000063
223.804	169.063	10.5207	18	1000000037
251.908	187.281	10.8749	18	1000000040
213.728	117.721	15.399	18	1000000041
247.635	142.116	15.067	18	1000000039
237.462	127.617	16.8283	18	1000000038
232.166	143.595	16.6277	18	1000000067
210.958	198.748	26.8405	18	1000000071
31.8065	244.309	6.70816	18	1000000045
30.5805	223.605	8.04743	18	1000000043
60.3312	235.188	12.7137	18	1000000058
43.4968	238.542	17.4138	18	1000000046
91.9519	240.898	19.2436	18	1000000072
197.194	230.488	18.0284	18	1000000048
105.635	223.265	24.7146	18	1000000049
139.949	252.706	25.3781	18	1000000051
165.074	233.006	29.8233	18	1000000052
247.165	230.55	13.5228	18	1000000053
218.309	224.789	15.4028	18	1000000054
203.93	258.138	28.7556	18	1000000066
145.502	64.0669	34.6204	18	1000000018
132.59	78.8451	36.5661	18	1000000055
160.892	153.887	33.1535	18	1000000033
212.555	116.622	36.8385	18	1000000061
241.837	120.029	36.2735	18	1000000056
71.0496	227.393	38.9424	18	1000000057
90.4987	242.765	45	18	1000000068
241.374	258.138	32.0099	18	1000000069
124.588	209.381	23	18	1000000095
55.3831	20.9505	7.84147	19	1000000000
88.2399	59.4466	12.6139	19	1000000060
22.0864	70.7645	13.1438	19	1000000003
44.7914	2.81836	15.6279	19	1000000006
34.811	90.5322	15.7947	19	1000000004
50.5993	60.5621	16.7477	19	1000000002
76.5865	75.0662	16.4569	19	1000000005
37.6936	99.3214	16.8246	19	1000000062
16.1987	29.7134	18.5968	19	1000000001
61.4159	95.1535	19.7995	19	1000000028
18.4328	96.0439	19.8089	19	1000000027
91.6985	93.2803	21.7947	19	1000000065
63.4656	69.3696	29.2554	19	1000000007
102.091	19.0312	6.75596	19	1000000008
106.834	54.5019	8.77227	19	1000000011
145.626	77.9989	8.32651	19	1000000009
114.824	26.2058	12.3634	19	1000000010
145.866	29.9488	12.5804	19	1000000015
110.223	62.9738	13.2705	19	1000000017
131.813	93.8298	12.8742	19	1000000012
119.69	61.6958	14.6262	19	1000000016
182.537	69.3191	17.6547	19	1000000014
181.141	49.4492	22.9366	19	1000000013
145.359	65.6803	31.3665	19	1000000018
220.081	45.0962	4.42418	19	1000000021
252.683	56.3375	4.34964	19	1000000022
214.055	27.2336	6.88089	19	1000000020
232.357	14.7385	8.95471	19	1000000019
228.12	75.7894	8.5973	19	1000000025
210.36	40.5669	14.1166	19	1000000023
228.758	62.6448	14.071	19	1000000024
253.443	93.035	28.7725	19	1000000064
65.4315	122.082	8.61173	19	1000000026
78.7106	194.982	13.4054	19	1000000047
83.4487	132.179	15.0384	19	1000000030
55.4352	162.201	16.1784	19	1000000029
10.348	180.982	20.4636	19	1000000073
54.6525	192.068	21.8123	19	1000000044
179.988	103.058	18.2303	19	1000000036
118.645	109.516	18.3661	19	1000000031
149.904	133.861	18.9556	19	1000000034
149.81	145.376	22.2416	19	1000000070
117.496	128.876	25.3909	19	1000000059
182.977	179.578	25.4504	19	1000000035
155.292	186.662	25.2957	19	1000000032
150.904	194.715	25.4368	19	1000000050
258.138	120.7	8.82986	19	1000000063
225.26	168.74	9.79716	19	1000000037
250.32	185.05	10.2268	19	1000000040
216.523	115.748	15.1336	19	1000000041
246.976	140.539	15.3865	19	1000000039
235.96	124.905	17.5973	19	1000000038
231.745	141.9	18.2937	19	1000000067
209.109	198.413	26.0615	19	1000000071
30.8113	244.01	7.11306	19	1000000045
30.4719	223.676	8.29117	19	1000000043
59.0035	234.747	14.1094	19	1000000058
43.6144	239.446	16.1389	19	1000000046
95.1832	237.179	18.6847	19	1000000072
197.584	230.695	18.3097	19	1000000048
138.493	252.019	25.4334	19	1000000051
106.271	223.934	26.3112	19	1000000049
163.681	233.263	29.1905	19	1000000052
203.23	258.138	28.0256	19	1000000066
244.81	231.098	13.9971	19	1000000053
218.59	223.427	14.7573	19	1000000054
130.302	75.818	34.6306	19	1000000055
159.898	153.927	33.4337	19	1000000033
211.443	115.027	37.064	19	1000000061
239.868	118.438	37.045	19	1000000056
70.5418	226.19	37.9501	19	1000000057
90.548	241.435	45	19	1000000068
241.686	256.192	32.1391	19	1000000069
129.151	207.805	23	19	1000000095
55.0343	21.1827	7.48753	20	1000000000
87.9463	59.6273	11.6381	20	1000000060
21.2065	70.7406	12.8523	20	1000000003
45.1248	3.82724	15.7684	20	1000000006
51.5285	60.7398	15.5641	20	1000000002
31.3135	91.1334	14.3848	20	1000000004
40.9984	99.3435	15.9293	20	1000000062
76.2419	71.2007	17.0016	20	1000000005
16.487	29.2052	18.5273	20	1000000001
61.0134	94.3389	19.344	20	1000000028
16.1458	94.8424	18.5576	20	1000000027
91.0832	89.4853	21.1154	20	1000000065
60.8215	67.9364	31.0805	20	1000000007
102.245	19.1652	7.75995	20	1000000008
106.241	54.1224	8.73189	20	1000000011
145.693	77.8366	8.35478	20	1000000009
113.588	27.3994	13.2752	20	1000000010
146.046	31.0978	12.7946	20	1000000015
119.514	61.1788	13.7013	20	1000000016
132.986	94.7971	13.7488	20	1000000012
107.771	60.758	14.3625	20	1000000017
182.654	66.5168	18.8164	20	1000000014
179.715	48.917	22.2653	20	1000000013
145.704	66.8434	30.62	20	1000000018
254.321	57.9506	3.4278	20	1000000022
220.895	46.4793	4.76671	20	1000000021
213.029	26.5867	7.11517	20	1000000020
230.7	14.9178	8.32041	20	1000000019
227.431	74.4709	8.29926	20	1000000025
211.684	39.4498	13.283	20	1000000023
227.711	61.6037	13.8936	20	1000000024
64.8781	122.831	8.86202	20	1000000026
83.1155	131.447	15.2145	20	1000000030
54.4979	165.256	15.448	20	1000000029
80.0501	195.516	14.4568	20	1000000047
94.2665	192.239	17.0638	20	1000000074
9.96146	177.909	20.3016	20	1000000073
53.0991	192.287	21.6844	20	1000000044
118.635	109.142	17.1901	20	1000000031
149.502	134.253	19.8096	20	1000000034
179.551	104.561	20.264	20	1000000036
149.237	144.598	21.9156	20	1000000070
118.132	128.971	23.623	20	1000000059
181.234	177.702	25.2066	20	1000000035
156.457	187.833	25.7408	20	1000000032
151.85	195.043	25.2032	20	1000000050
258.138	120.919	8.71573	20	1000000063
225.033	168.387	8.81257	20	1000000037
251.112	184.378	10.7663	20	1000000040
217.383	112.84	14.3266	20	1000000041
246.613	140.905	15.9122	20	1000000039
235.563	123.808	17.2916	20	1000000038
231.33	139.724	18.8908	20	1000000067
210.393	198.45	26.2228	20	1000000071
30.1023	243.531	7.54682	20	1000000045
28.8294	224.576	8.12809	20	1000000043
97.3367	236.181	14.7398	20	1000000072
43.6865	240.268	15.3736	20	1000000046
72.8008	258.138	15.9587	20	1000000075
56.8462	232.91	16.9839	20	1000000058
66.8926	248.536	22.4381	20	1000000076
198.418	230.143	17.407	20	1000000048
139.691	250.458	24.5204	20	1000000051
104.6	224.998	27.8783	20	1000000049
202.315	258.138	27.7073	20	1000000066
163.517	231.233	30.3857	20	1000000052
218.506	223.562	15.5134	20	1000000054
244.252	229.895	14.0811	20	1000000053
243.153	253.435	31.3309	20	1000000069
128.783	74.3087	33.3277	20	1000000055
159.724	152.829	33.3663	20	1000000033
210.512	112.825	35.5314	20	1000000061
239.767	117.418	36.5213	20	1000000056
67.6566	224.494	37.1266	20	1000000057
89.386	240.405	45	20	1000000068
135.04	207.302	23	20	1000000095
55.2931	20.8119	6.73575	21	1000000000
87.0278	58.3643	12.5265	21	1000000060
20.9084	68.5344	12.215	21	1000000003
31.7271	91.6366	13.7932	21	1000000004
44.2786	4.73137	15.7519	21	1000000006
42.5426	98.2882	15.9051	21	1000000062
14.8834	28.8439	17.8698	21	1000000001
50.6239	60.9263	16.6992	21	1000000002
74.515	70.4416	18.5746	21	1000000005
18.0714	92.122	18.4332	21	1000000027
90.037	87.899	21.0004	21	1000000065
60.9509	92.9742	20.951	21	1000000028
102.572	19.4154	7.45182	21	1000000008
105.359	53.6667	8.76982	21	1000000011
146.572	76.9109	8.36223	21	1000000009
114.574	29.6764	13.5345	21	1000000010
145.868	31.4583	12.2819	21	1000000015
117.398	58.3117	12.8506	21	1000000016
105.908	59.7768	15.3286	21	1000000017
137.903	94.6769	15.1683	21	1000000012
182.112	64.6536	19.2067	21	1000000014
178.628	48.1895	21.2327	21	1000000013
145.694	65.5897	27.6684	21	1000000018
130.017	70.3849	31.8258	21	1000000055
254.476	55.8245	3.49475	21	1000000022
221.202	45.266	5.77512	21	1000000021
214.05	25.9277	7.77951	21	1000000020
227.009	71.7943	7.93436	21	1000000025
231.406	12.4871	8.42614	21	1000000019
213.454	39.082	13.1631	21	1000000023
226.365	59.3391	13.493	21	1000000024
252.698	87.6016	26.8911	21	1000000064
63.7282	121.737	8.84871	21	1000000026
79.3845	130.757	15.8199	21	1000000030
53.631	165.917	15.471	21	1000000029
80.1618	194.558	14.8809	21	1000000047
12.8482	179.529	17.6902	21	1000000073
96.0131	190.511	17.793	21	1000000074
51.388	191.921	23.0218	21	1000000044
149.792	145.165	17.5884	21	1000000070
116.381	107.934	18.6286	21	1000000031
178.621	102.766	20.8986	21	1000000036
149.481	133.284	20.1004	21	1000000034
117.41	128.567	23.1106	21	1000000059
179.135	175.61	24.5215	21	1000000035
157.262	186.431	25.0235	21	1000000032
149.805	190.839	24.8372	21	1000000050
258.138	118.999	9.18354	21	1000000063
226.258	167.837	8.99783	21	1000000037
250.201	184.03	10.5701	21	1000000040
218.878	111.265	13.5162	21	1000000041
236.177	121.406	17.3517	21	1000000038
246.465	140.034	16.4316	21	1000000039
230.363	138.355	18.4861	21	1000000067
211.904	197.564	25.9555	21	1000000071
24.0619	225.18	8.15323	21	1000000043
27.7879	244.704	8.55951	21	1000000045
98.9973	236.793	12.2629	21	1000000072
43.8698	241.451	12.1911	21	1000000046
67.9267	245.992	15.5726	21	1000000076
73.2751	258.138	16.8813	21	1000000075
54.1189	234.707	20.2369	21	1000000058
62.6527	226.797	24.8153	21	1000000077
197.92	229.604	17.5781	21	1000000048
143.955	244.455	24.6269	21	1000000051
101.99	222.651	28.5631	21	1000000049
160.543	229.334	29.7562	21	1000000052
200.023	256.662	28.477	21	1000000066
243.348	229.394	13.1393	21	1000000053
218.455	223.256	15.3258	21	1000000054
243.813	251.476	29.7098	21	1000000069
57.7392	63.7498	32.3119	21	1000000007
158.607	151.224	33.6928	21	1000000033
211.185	110.926	35.0231	21	1000000061
239.231	116.206	36.5879	21	1000000056
65.7638	223.719	38.46	21	1000000057
91.6231	240.052	43.8224	21	1000000068
137.451	206.781	23	21	1000000095
54.932	21.567	6.28823	22	1000000000
19.8723	66.1993	11.7004	22	1000000003
86.0795	58.1603	12.3602	22	1000000060
42.6624	5.00383	14.1227	22	1000000006
30.6713	91.472	14.6069	22	1000000004
15.707	28.7989	17.572	22	1000000001
51.3239	59.5827	16.3412	22	1000000002
47.9574	93.7157	16.627	22	1000000062
73.9961	68.0753	19.8924	22	1000000005
92.6659	86.8672	19.9831	22	1000000065
18.535	90.5757	18.935	22	1000000027
60.4362	92.621	21.0583	22	1000000028
57.644	60.8677	31.0306	22	1000000007
102.249	20.1269	7.86369	22	1000000008
147.737	76.5859	8.18081	22	1000000009
147.578	29.3811	12.5721	22	1000000015
117.797	57.3449	13.1284	22	1000000016
115.426	29.7699	14.6658	22	1000000010
105.505	57.3256	17.4848	22	1000000017
140.273	94.0406	16.0301	22	1000000012
177.606	47.5453	20.3737	22	1000000013
181.706	64.0898	20.097	22	1000000014
146.948	63.7344	25.6389	22	1000000018
129.981	66.1378	30.131	22	1000000055
231.061	12.31	5.75817	22	1000000019
221.794	43.5138	5.43068	22	1000000021
254.802	55.0872	5.29747	22	1000000022
213.891	24.9323	7.01966	22	1000000020
226.956	68.5005	7.55952	22	1000000025
212.394	38.4324	12.9537	22	1000000023
224.705	56.7972	12.7109	22	1000000024
252.46	84.7972	26.326	22	1000000064
62.9801	120.867	10.4461	22	1000000026
80.7704	192.766	13.9552	22	1000000047
54.487	165.149	15.3131	22	1000000029
64.3984	134.447	17.5415	22	1000000078
12.1207	179.277	17.6275	22	1000000073
99.7956	189.887	16.3718	22	1000000074
74.9219	129.068	18.5136	22	1000000030
51.1102	192.85	22.1853	22	1000000044
114.616	107.227	18.7803	22	1000000031
147.858	133.069	19.7037	22	1000000034
149.131	144.706	18.395	22	1000000070
176.773	105.796	21.2221	22	1000000036
115.672	127.456	22.302	22	1000000059
175.209	174.763	24.9338	22	1000000035
158.066	184.981	25.4827	22	1000000032
150.523	190.071	26.3236	22	1000000050
258.138	117.844	8.93414	22	1000000063
226.278	168.382	9.30896	22	1000000037
250.858	183.566	11.4136	22	1000000040
219.097	109.571	13.4694	22	1000000041
237.143	120.075	16.9765	22	1000000038
245.847	140.467	16.877	22	1000000039
230.578	136.01	18.6962	22	1000000067
212.909	197.685	27.0811	22	1000000071
28.7947	244.49	7.85052	22	1000000045
20.4413	227.182	8.01326	22	1000000043
99.4412	235.943	9.60753	22	1000000072
44.0484	242.188	11.6038	22	1000000046
71.6157	242.88	12.6125	22	1000000076
75.2112	258.138	15.8164	22	1000000075
53.3367	238.698	20.0056	22	1000000058
63.4221	228.776	22.4742	22	1000000077
99.2728	221.39	28.5042	22	1000000049
197.966	229.466	18.3017	22	1000000048
143.591	241.905	24.5738	22	1000000051
199.707	255.689	29.5441	22	1000000066
159.285	229.085	30.7691	22	1000000052
241.268	229.185	13.867	22	1000000053
217.043	223.788	14.8057	22	1000000054
241.908	249.952	27.7168	22	1000000069
156.168	149.314	33.7144	22	1000000033
209.709	109.067	35.642	22	1000000061
238.734	114.944	37.581	22	1000000056
64.5093	223.255	39.7307	22	1000000057
91.3218	239.549	40.1677	22	1000000068
105.494	57.3291	17.4802	22	1000000011
133.89	208.27	23	22	1000000095
55.4373	22.2359	6.09503	23	1000000000
20.3818	66.0317	9.64901	23	1000000003
86.1964	57.3905	12.7744	23	1000000060
41.8379	5.28058	14.2549	23	1000000006
28.9863	93.1527	14.8489	23	1000000004
17.4579	28.7552	17.921	23	1000000001
51.92	58.2734	16.3952	23	1000000002
50.9664	91.1781	17.1912	23	1000000062
91.7929	85.5395	19.0314	23	1000000065
73.8231	70.5158	20.0985	23	1000000005
16.3816	89.9651	20.0668	23	1000000027
61.2963	91.9021	21.0298	23	1000000028
54.8402	56.8203	31.6402	23	1000000007
149.406	76.3842	7.52911	23	1000000009
102.616	20.1055	8.77142	23	1000000008
147.615	27.503	12.7408	23	1000000015
117.801	58.2205	13.1712	23	1000000016
114.836	30.5606	14.9383	23	1000000010
181.363	61.7036	16.3373	23	1000000014
140.713	95.7076	16.3483	23	1000000012
104.553	55.3959	18.2223	23	1000000017
175.973	45.5639	20.4	23	1000000013
145.473	62.736	22.535	23	1000000018
131.515	66.2403	29.4919	23	1000000055
230.183	11.08	5.22307	23	1000000019
213.433	24.0253	5.25821	23	1000000020
222.117	41.2357	5.42934	23	1000000021
252.854	52.9424	6.08347	23	1000000022
226.772	66.3646	7.17769	23	1000000025
224.692	54.1234	11.3565	23	1000000024
212.836	36.6703	13.095	23	1000000023
250.893	81.6564	24.2948	23	1000000064
63.036	120.915	10.7454	23	1000000026
80.8597	189.432	13.272	23	1000000047
54.4303	165.001	15.0683	23	1000000029
67.1028	137.871	17.4076	23	1000000078
12.245	177.277	19.5606	23	1000000073
75.1856	127.822	20.4003	23	1000000030
51.9932	189.682	22.0793	23	1000000044
114.184	107.797	17.1948	23	1000000031
102.83	186.636	17.3726	23	1000000074
177.78	107.795	19.6157	23	1000000036
146.207	133.309	19.2055	23	1000000034
117.215	128.018	21.0595	23	1000000059
150.583	145.001	20.6561	23	1000000070
173.807	173.364	25.0524	23	1000000035
158.248	184.553	25.6268	23	1000000032
149.964	188.994	26.3641	23	1000000050
258.138	116.495	8.61542	23	1000000063
226.137	167.758	9.38157	23	1000000037
250.076	183.093	11.8385	23	1000000040
218.627	108.498	13.3453	23	1000000041
237.476	119.031	15.7063	23	1000000038
246.302	140.258	16.9347	23	1000000039
228.619	134.761	18.8529	23	1000000067
212.834	194.796	27.8974	23	1000000071
28.6893	243.918	7.54019	23	1000000045
18.2542	228.298	8.56083	23	1000000043
100.363	236.533	8.6163	23	1000000072
43.854	243.418	10.8449	23	1000000046
70.4137	239.898	12.2897	23	1000000076
75.6062	258.138	15.3875	23	1000000075
53.6328	240.309	18.7307	23	1000000058
63.3286	229.038	21.7756	23	1000000077
97.4533	220.898	27.8187	23	1000000049
200.475	231.383	18.8909	23	1000000048
143.51	240.763	25.1753	23	1000000051
159.686	228.08	30.4664	23	1000000052
200.738	252.757	30.6091	23	1000000066
214.849	224.681	14.5606	23	1000000054
238.909	229.093	14.0781	23	1000000053
240.846	249.881	26.9427	23	1000000069
154.048	148.971	35.2375	23	1000000033
226.204	112.35	32.4989	23	1000000079
209.829	107.422	34.6494	23	1000000061
237.884	115.472	36.9862	23	1000000056
64.6726	219.881	39.1474	23	1000000057
91.7153	237.57	39.3011	23	1000000068
104.544	55.3936	18.212	23	1000000011
129.603	209.047	23	23	1000000095
36.4131	258.138	14.5871	23	1000000099
55.185	22.0003	5.47524	24	1000000000
20.9534	64.0453	9.63744	24	1000000003
85.4423	57.8173	10.8547	24	1000000060
40.6873	3.62579	12.4394	24	1000000006
28.9545	93.5053	15.017	24	1000000004
51.7792	56.9737	16.7369	24	1000000002
53.697	90.1923	16.7504	24	1000000062
17.5905	27.2084	18.5371	24	1000000001
74.1315	70.1951	18.3633	24	1000000005
92.5207	84.9899	18.6404	24	1000000065
15.5387	89.0999	21.3423	24	1000000027
64.239	91.6818	20.4264	24	1000000028
150.217	75.9676	7.71195	24	1000000009
102.412	20.1625	9.3178	24	1000000008
107.724	51.3994	9.31266	24	1000000011
149.183	27.2162	11.545	24	1000000015
118.157	61.6763	11.7488	24	1000000016
180.761	61.579	13.0128	24	1000000014
116.546	30.9703	14.4077	24	1000000010
104.525	54.8863	16.7811	24	1000000017
141.596	96.7394	17.2528	24	1000000012
174.26	44.8067	21.0006	24	1000000013
145.075	61.1561	21.3623	24	1000000018
130.258	63.7251	31.4604	24	1000000055
228.687	10.3016	4.75693	24	1000000019
213.723	23.2466	4.9976	24	1000000020
222.303	39.507	5.33624	24	1000000021
250.915	51.3485	4.72694	24	1000000022
228.543	65.657	7.5089	24	1000000025
224.193	53.4095	11.3896	24	1000000024
212.491	34.8188	14.252	24	1000000023
250.969	82.2122	24.8401	24	1000000064
64.9344	122.686	10.3302	24	1000000026
81.6048	187.223	13.0598	24	1000000047
54.1817	164.13	14.586	24	1000000029
68.1999	140.498	16.9045	24	1000000078
14.8914	178.541	19.8064	24	1000000073
75.3382	127.25	20.3423	24	1000000030
51.428	186.575	22.7601	24	1000000044
113.573	107.618	18.7289	24	1000000031
179.309	110.333	20.0186	24	1000000036
118.605	129.109	20.8846	24	1000000059
148.348	133.25	20.9527	24	1000000034
150.104	147.515	21.6109	24	1000000070
105.85	184.833	20.5864	24	1000000074
171.926	173.21	25.5221	24	1000000035
160.174	184.044	26.445	24	1000000032
152.068	187.631	28.7901	24	1000000050
257.707	114.99	8.46289	24	1000000063
227.414	168.481	9.83516	24	1000000037
249.99	183.075	12.6943	24	1000000040
217.985	109.271	14.2904	24	1000000041
236.482	115.713	16.6196	24	1000000038
246.299	137.572	17.0274	24	1000000039
229.182	133.273	18.685	24	1000000067
228.924	110.059	31.4176	24	1000000079
212.508	193.07	30.1909	24	1000000071
100.841	236.961	7.98844	24	1000000072
27.3228	246.306	7.5419	24	1000000045
19.3582	228.52	8.50803	24	1000000043
44.5115	244.701	9.95781	24	1000000046
67.8374	236.59	11.8539	24	1000000076
76.7373	258.138	13.5999	24	1000000075
53.5656	242.351	16.6644	24	1000000058
60.7424	229.459	22.4193	24	1000000077
96.1844	218.806	27.0782	24	1000000049
202.427	232.65	20.8779	24	1000000048
162.152	258.138	23.0183	24	1000000080
156.662	226.18	29.8646	24	1000000052
142.439	238.873	28.7579	24	1000000051
201.46	251.538	30.1512	24	1000000066
237.416	229.058	13.7862	24	1000000053
215.317	226.032	15.3423	24	1000000054
240.634	248.468	27.1705	24	1000000069
50.0645	52.6606	34.6812	24	1000000007
152.352	147.811	35.4436	24	1000000033
209.974	105.254	33.3891	24	1000000061
237.601	115.328	36.6461	24	1000000056
61.1712	217.024	39.0535	24	1000000057
90.4743	233.272	38.074	24	1000000068
130.677	208.519	23	24	1000000095
37.7445	255.064	14.92	24	1000000099
54.4674	21.2211	4.71542	25	1000000000
85.1556	58.69	9.29374	25	1000000060
22.2133	62.7277	9.31415	25	1000000003
40.1419	2.75093	11.2829	25	1000000006
52.1095	57.9321	16.9956	25	1000000002
73.701	68.8376	17.8168	25	1000000005
19.6189	26.682	18.9452	25	1000000001
54.8402	87.0199	19.0828	25	1000000062
65.4962	90.0448	19.1968	25	1000000028
28.6176	94.2789	19.3446	25	1000000004
91.6893	84.1561	20.1865	25	1000000065
16.5228	87.8076	21.8235	25	1000000027
109.246	50.5501	8.75159	25	1000000011
148.313	74.65	9.69518	25	1000000009
102.045	19.6197	10.4983	25	1000000008
147.778	25.8245	11.6538	25	1000000015
118.503	60.6143	10.9378	25	1000000016
116.407	32.1381	13.2901	25	1000000010
180.4	60.4854	12.2355	25	1000000014
103.532	51.7516	16.1144	25	1000000017
141.96	97.078	17.0813	25	1000000012
174.03	43.3294	19.3092	25	1000000013
144.12	59.7393	19.5196	25	1000000018
129.548	63.5494	31.8166	25	1000000055
225.028	9.9652	4.79642	25	1000000019
214.55	23.9412	5.24027	25	1000000020
249.521	49.886	4.98478	25	1000000022
222.201	38.3958	6.21508	25	1000000021
229.08	63.2438	6.61353	25	1000000025
224.188	52.86	11.8329	25	1000000024
212.139	34.2632	16.0296	25	1000000023
252.53	85.4497	30.122	25	1000000064
67.3945	123.592	9.96571	25	1000000026
79.9725	185.587	11.3577	25	1000000047
52.8019	164.142	13.6945	25	1000000029
69.5598	139.791	17.5273	25	1000000078
13.4319	178.916	20.9082	25	1000000073
49.0402	184.954	21.8765	25	1000000044
75.3822	125.443	22.3666	25	1000000030
114.194	107.29	19.8749	25	1000000031
179.231	109.637	21.2607	25	1000000036
119.476	126.377	20.8163	25	1000000059
150.52	132.682	21.9525	25	1000000034
150.503	146.609	21.0462	25	1000000070
107.853	184.135	21.6887	25	1000000074
169.993	172.635	25.5376	25	1000000035
160.223	183.694	25.6736	25	1000000032
151.72	187.057	29.3691	25	1000000050
256.852	113.178	8.71487	25	1000000063
228.894	168.643	9.86919	25	1000000037
249.611	183.087	12.9016	25	1000000040
214.594	106.387	15.6953	25	1000000041
234.06	114.838	15.5156	25	1000000038
246.713	134.884	16.0445	25	1000000039
228.907	130.813	18.9943	25	1000000067
226.81	110.261	29.9727	25	1000000079
211.459	191.035	29.8513	25	1000000071
208.349	102.178	30.5943	25	1000000061
101.686	236.479	7.11286	25	1000000072
21.1935	229.215	8.57008	25	1000000043
22.5799	246.398	8.57436	25	1000000045
67.822	233.51	11.287	25	1000000076
43.1822	243.868	10.9014	25	1000000046
79.0029	253.91	13.3234	25	1000000075
53.9201	241.907	14.6537	25	1000000058
59.8661	229.107	23.1561	25	1000000077
96.5646	219.434	28.5667	25	1000000049
202.904	233.775	22.9958	25	1000000048
164.483	258.138	23.1271	25	1000000080
155.634	224.043	30.5499	25	1000000052
142.983	237.674	31.4211	25	1000000051
200.802	249.623	30.5776	25	1000000066
216.101	225.224	15.8503	25	1000000054
231.744	231.194	17.3707	25	1000000053
239.66	247.68	29.0347	25	1000000069
49.1351	50.4882	35.383	25	1000000007
149.216	147.967	36.5822	25	1000000033
236.183	114.041	37.219	25	1000000056
57.901	215.379	39.7877	25	1000000057
88.3849	232.949	38.6133	25	1000000068
130.153	207.184	23	25	1000000095
36.8063	252.904	16.1924	25	1000000099
55.3282	21.6631	4.55035	26	1000000000
21.7443	60.9163	9.22871	26	1000000003
39.869	0.397748	11.0557	26	1000000006
100.477	19.6095	11.7497	26	1000000008
85.5243	58.4485	10.4603	26	1000000060
51.8861	58.3048	17.5245	26	1000000002
73.2826	67.3524	19.8333	26	1000000005
66.0753	86.2805	18.8842	26	1000000028
20.3742	25.4733	20.4444	26	1000000001
89.3331	78.207	20.5596	26	1000000065
53.5129	85.0162	20.6016	26	1000000062
29.0063	92.1722	20.2125	26	1000000004
17.109	85.4895	23.1394	26	1000000027
148.098	73.2497	9.1466	26	1000000009
111.727	50.7314	10.4911	26	1000000011
147.33	24.6399	12.5675	26	1000000015
115.158	32.3202	12.6589	26	1000000010
116.359	61.1529	12.6927	26	1000000016
180.906	61.2736	13.0651	26	1000000014
103.368	49.8715	17.9904	26	1000000017
141	98.5465	16.4689	26	1000000012
173.326	43.853	19.4846	26	1000000013
142.397	56.2862	19.1659	26	1000000018
129.099	60.5074	30.7918	26	1000000055
221.714	8.732	4.47572	26	1000000019
247.504	48.2164	4.54126	26	1000000022
217.017	23.7505	7.17281	26	1000000020
220.443	38.8197	6.77073	26	1000000021
227.376	62.4812	6.53914	26	1000000025
223.328	52.875	13.7487	26	1000000024
210.146	33.3019	16.3054	26	1000000023
206.742	99.8618	28.363	26	1000000061
69.1834	122.601	10.457	26	1000000026
78.2692	184.826	11.2397	26	1000000047
51.2433	161.486	14.5727	26	1000000029
68.034	137.874	19.3817	26	1000000078
13.0665	175.866	18.4043	26	1000000073
45.4705	184.967	20.1642	26	1000000044
74.5446	122.871	23.7862	26	1000000030
180.848	109.745	19.9439	26	1000000036
149.649	146.625	19.6276	26	1000000070
115.53	106.009	20.3418	26	1000000031
120.574	124.382	20.7871	26	1000000059
150.612	130.818	21.3314	26	1000000034
109.872	183.218	23.5072	26	1000000074
168.681	170.811	24.7798	26	1000000035
160.033	186.15	25.8249	26	1000000032
152.676	186.41	28.6656	26	1000000050
258.138	112.188	8.85528	26	1000000063
230.07	168.596	9.43675	26	1000000037
249.056	183.662	13.039	26	1000000040
213.221	102.467	15.057	26	1000000041
232.503	113.068	16.1136	26	1000000038
247.75	133.017	18.5153	26	1000000039
229.073	127.961	21.1703	26	1000000067
223.592	107.366	29.0569	26	1000000079
212.047	189.912	30.6514	26	1000000071
20.3297	245.77	8.79317	26	1000000045
23.4217	228.586	10.1206	26	1000000043
67.1657	232.172	10.8849	26	1000000076
42.2844	242.155	10.8017	26	1000000046
54.5949	242.437	10.4294	26	1000000058
80.5785	251.478	11.6974	26	1000000075
58.5797	227.982	23.2401	26	1000000077
95.0653	217.731	26.4496	26	1000000049
102.858	236.999	7.14521	26	1000000072
203.296	233.635	22.4449	26	1000000048
169.387	258.138	23.7054	26	1000000080
155.283	222.255	29.4314	26	1000000052
200.773	247.923	29.4712	26	1000000066
216.217	226.234	16.9771	26	1000000054
229.031	228.683	18.3775	26	1000000053
237.867	246.879	28.7146	26	1000000069
48.3653	47.1859	35.3537	26	1000000007
255.141	87.1417	32.0402	26	1000000064
146.617	146.277	36.8689	26	1000000033
234.643	112.255	37.1327	26	1000000056
86.1769	230.468	39.4766	26	1000000068
55.7912	258.138	39.8611	26	1000000081
56.913	214.15	41.1119	26	1000000057
142.799	236.745	32.462	26	1000000051
127.476	207.169	23	26	1000000095
34.4119	251.745	15.8123	26	1000000099
55.214	21.2913	4.98269	27	1000000000
22.8538	59.6628	9.13661	27	1000000003
40.9141	2.66722	10.2755	27	1000000006
100.001	18.6549	11.5279	27	1000000008
86.1128	59.0469	10.2757	27	1000000060
67.0553	84.8554	17.9446	27	1000000028
52.7218	62.9715	18.8912	27	1000000002
52.9115	83.5279	19.274	27	1000000062
72.9101	66.9075	19.6768	27	1000000005
87.448	76.9477	21.0716	27	1000000065
31.7627	90.2581	21.5103	27	1000000004
20.9954	24.4868	22.4447	27	1000000001
16.9996	83.9801	23.935	27	1000000027
113.732	50.8029	9.64035	27	1000000011
146.795	72.1901	8.93317	27	1000000009
148.666	24.0992	11.1666	27	1000000015
117.498	32.1665	13.368	27	1000000010
179.639	60.9862	13.5934	27	1000000014
114.648	61.6959	12.2003	27	1000000016
102.318	46.5044	15.2687	27	1000000017
142.583	52.868	17.75	27	1000000018
139.487	99.2949	19.2807	27	1000000012
172.519	42.3536	20.9014	27	1000000013
128.002	60.1264	31.2966	27	1000000055
219.465	9.29154	1	27	1000000019
245.289	46.6716	4.33364	27	1000000022
226.168	62.0614	5.98978	27	1000000025
219.122	25.3186	7.27866	27	1000000020
219.193	39.5317	6.81001	27	1000000021
208.657	33.8748	14.7056	27	1000000023
221.523	51.2653	14.5692	27	1000000024
207.66	95.924	26.7736	27	1000000061
69.9235	121.306	11.3614	27	1000000026
77.2574	184.096	11.9667	27	1000000047
51.4712	160.848	13.682	27	1000000029
90.8043	110.45	19.3045	27	1000000082
68.5389	136.274	19.1935	27	1000000078
12.2373	172.933	18.7908	27	1000000073
43.2658	184.917	18.4552	27	1000000044
77.7037	118.575	25.7404	27	1000000030
180.234	106.638	18.044	27	1000000036
147.782	149.474	19.0099	27	1000000070
117.241	106.356	21.3272	27	1000000031
121.606	122.644	21.3398	27	1000000059
151.623	131.85	22.4331	27	1000000034
111.797	182.297	22.9163	27	1000000074
166.445	167.967	24.7375	27	1000000035
152.408	185.615	27.5256	27	1000000050
158.719	191.828	27.2871	27	1000000032
258.138	111.191	8.517	27	1000000063
230.6	167.91	9.08465	27	1000000037
230.748	112.442	13.5994	27	1000000038
248.5	182.651	13.0399	27	1000000040
212.871	101.975	14.9591	27	1000000041
248.98	132.334	18.4121	27	1000000039
227.539	125.837	21.5259	27	1000000067
222.725	104.828	27.7335	27	1000000079
212.92	188.894	30.0781	27	1000000071
67.5607	230.202	9.18536	27	1000000076
57.8028	244.615	9.13807	27	1000000058
21.8997	229.528	10.76	27	1000000043
41.2239	242.176	11.1428	27	1000000046
19.0669	246.094	10.2678	27	1000000045
80.0048	249.311	13.0036	27	1000000075
57.9142	226.497	21.0397	27	1000000077
96.0368	217.186	22.1711	27	1000000049
103.591	238.313	6.51908	27	1000000072
203.456	232.636	22.2403	27	1000000048
169.203	256.6	23.0611	27	1000000080
154.729	219.822	29.3526	27	1000000052
200.411	244.161	29.8761	27	1000000066
216.224	225.301	16.8331	27	1000000054
228.862	228.399	17.872	27	1000000053
236.839	245.393	28.4591	27	1000000069
45.9798	46.4608	32.7958	27	1000000007
253.07	85.9771	32.7912	27	1000000064
143.527	145.974	36.1177	27	1000000033
233.492	111.276	35.5008	27	1000000056
57.5744	212.874	39.5629	27	1000000057
84.1262	226.454	38.7052	27	1000000068
55.5389	258.138	38.6446	27	1000000081
144.09	235.585	35.5256	27	1000000051
127.478	206.903	23	27	1000000095
32.5741	251.613	16.4766	27	1000000099
56.1927	21.2148	4.55653	28	1000000000
22.037	56.3865	7.42879	28	1000000003
41.9303	2.88857	9.69153	28	1000000006
86.403	60.9489	10.0299	28	1000000060
99.8454	17.3456	10.9148	28	1000000008
52.0667	67.0094	17.2104	28	1000000002
66.3351	85.0082	16.6139	28	1000000028
51.6819	84.8422	19.6932	28	1000000062
73.5904	65.2902	20.0877	28	1000000005
85.0606	76.2419	20.259	28	1000000065
21.9098	22.7289	23.2585	28	1000000001
32.0561	91.1503	23.228	28	1000000004
15.6726	83.0958	24.9376	28	1000000027
44.1949	46.1391	28.8504	28	1000000007
146.167	71.7588	9.58575	28	1000000009
151.79	23.5649	10.3188	28	1000000015
116.771	49.0728	11.1786	28	1000000011
111.231	60.2422	11.4766	28	1000000016
119.387	31.3	13.8904	28	1000000010
181.454	60.8873	12.759	28	1000000014
104.412	43.5432	14.7557	28	1000000017
143.011	53.1311	16.7908	28	1000000018
141.105	100.391	18.8589	28	1000000012
170.871	41.6112	20.6752	28	1000000013
219.497	9.64719	1	28	1000000019
221.012	26.0365	4.77186	28	1000000020
219.393	38.3026	5.51106	28	1000000021
243.545	43.34	4.68796	28	1000000022
225.676	61.0227	6.55322	28	1000000025
208.203	33.065	14.0251	28	1000000023
220.833	49.9905	15.4119	28	1000000024
213.091	101.698	16.2967	28	1000000041
206.132	95.3546	26.2065	28	1000000061
72.3712	180.278	11.4175	28	1000000047
70.5701	120.877	12.546	28	1000000026
50.2515	160.696	13.7706	28	1000000029
41.35	185.058	16.7399	28	1000000044
91.8796	110.916	19.5499	28	1000000082
82.0605	153.15	18.9713	28	1000000083
14.8639	173.707	19.1028	28	1000000073
67.4093	134.984	20.1483	28	1000000078
78.9505	115.657	24.5595	28	1000000030
72.2675	155.934	32.1325	28	1000000084
182.202	106.737	17.5777	28	1000000036
116.103	107.274	19.9817	28	1000000031
145.766	147.422	18.8047	28	1000000070
121.645	121.898	21.7262	28	1000000059
112.918	183.555	22.1195	28	1000000074
153.699	184.448	23.8066	28	1000000050
153.34	132.068	24.0345	28	1000000034
166.736	165.866	25.1538	28	1000000035
154.752	195.092	26.2786	28	1000000032
258.138	111.216	9.0254	28	1000000063
231.288	167.22	9.00735	28	1000000037
229.464	110.561	12.7584	28	1000000038
248.564	181.888	12.9885	28	1000000040
248.275	130.403	19.0242	28	1000000039
226.138	122.606	22.0292	28	1000000067
223.587	103.722	27.1274	28	1000000079
213.889	188.274	29.1059	28	1000000071
61.1707	245.838	7.04705	28	1000000058
68.7134	228.441	9.22871	28	1000000076
21.2451	230.625	10.4014	28	1000000043
40.4904	242.54	10.8532	28	1000000046
20.2422	245.203	12.2883	28	1000000045
81.5192	246.732	12.5548	28	1000000075
99.6956	218.188	18.6954	28	1000000049
57.0514	225	19.3003	28	1000000077
102.199	240.195	6.77244	28	1000000072
202.618	233.923	21.5955	28	1000000048
170.663	256.311	23.2512	28	1000000080
153.042	217.164	29.58	28	1000000052
201.719	238.872	31.017	28	1000000066
216.073	224.659	15.7442	28	1000000054
228.738	227.472	17.9821	28	1000000053
236.751	245.325	27.0256	28	1000000069
127.483	59.8575	33.5943	28	1000000055
252.151	85.624	32.5441	28	1000000064
141.227	146.132	37.1221	28	1000000033
233.389	107.087	35.937	28	1000000056
54.0938	212.122	39.5559	28	1000000057
82.2443	223.052	39.2398	28	1000000068
55.1159	258.138	38.6267	28	1000000081
145.739	235.783	36.8891	28	1000000051
127.299	210.138	27	28	1000000095
32.1742	251.14	17.0252	28	1000000099
58.5036	23.1143	4.3342	29	1000000000
22.434	54.3093	7.79105	29	1000000003
87.5221	59.1078	7.66153	29	1000000060
43.1842	3.9129	9.59284	29	1000000006
99.2307	17.5355	11.0338	29	1000000008
67.4365	85.4518	13.6905	29	1000000028
49.9881	68.7872	15.5795	29	1000000002
53.9367	83.1276	17.5409	29	1000000062
84.1166	77.3086	18.3184	29	1000000065
71.5645	65.5059	20.1649	29	1000000005
14.182	82.8757	23.3233	29	1000000027
33.5755	91.0045	22.5492	29	1000000004
21.9384	22.7975	25.1684	29	1000000001
42.5494	43.9294	28.8843	29	1000000007
145.876	71.7738	9.27578	29	1000000009
152.354	20.5223	10.4365	29	1000000015
117.762	48.7752	11.679	29	1000000011
109.248	60.1118	10.6849	29	1000000016
106.445	41.2037	13.5706	29	1000000017
180.981	60.6486	13.7636	29	1000000014
121.279	30.9938	14.5334	29	1000000010
144.446	53.5168	15.6605	29	1000000018
171.513	40.2536	20.3301	29	1000000013
216.946	9.30204	1	29	1000000019
222	24.786	1	29	1000000020
242.063	38.7421	3.26475	29	1000000022
219.328	37.4225	5.22511	29	1000000021
225.279	61.5344	7.10782	29	1000000025
208.005	33.4188	13.732	29	1000000023
220.959	48.888	15.866	29	1000000024
204.276	93.2292	24.3229	29	1000000061
252.541	82.8679	31.3704	29	1000000064
72.6079	176.725	10.5855	29	1000000047
70.1877	120.761	12.4872	29	1000000026
50.4318	159.743	14.3143	29	1000000029
41.6127	184.081	16.1165	29	1000000044
92.3143	108.971	19.2602	29	1000000082
82.4888	153.492	19.6699	29	1000000083
16.5001	174.054	18.5145	29	1000000073
[truncated: 6,475 more rows]

## Sheet: NCadM-2-ControlSide
Position
Position X	Position Y	Position Z	Time	TrackID
62.8982	80.5808	10.277	1	1000000000
51.9354	51.554	17.5366	1	1000000001
66.7674	79.1251	18.1311	1	1000000002
80.0114	60.7821	21.1252	1	1000000003
115.644	60.5593	10.4884	1	1000000004
115.882	45.9849	14.4276	1	1000000005
182.005	21.5673	13.6552	1	1000000006
44.9615	87.0396	16.3953	1	1000000007
61.2439	93.3647	23.3837	1	1000000008
151.752	105.575	11.7274	1	1000000009
110.483	121.18	10.4151	1	1000000010
91.5889	118.247	12.9442	1	1000000011
103.025	156.825	13.4601	1	1000000012
119.173	97.8547	14.3859	1	1000000013
144.595	94.1272	17.8991	1	1000000014
128.561	144.429	19.8173	1	1000000015
55.9531	186.411	13.0293	1	1000000016
27.7663	185.733	17.3427	1	1000000017
153.711	191.874	11.4872	1	1000000018
120.194	169.754	18.7235	1	1000000019
105.061	165.933	30.5442	1	1000000020
42.5317	101.785	16.2369	1	1000000023
90.5978	171.64	18.7637	1	1000000027
33.0237	145.254	19.5447	1	1000000028
88.2032	94.6821	18.7808	1	1000000022
85.9704	123.438	25.2919	1	1000000032
152.604	76.3841	29	1	1000000024
4.80716	157.94	22.3283	1	1000000039
43.1411	61.5394	15.9717	1	1000000040
62.1126	77.8822	10.4605	2	1000000000
67.4337	78.161	17.3881	2	1000000002
53.2314	49.8945	18.1355	2	1000000001
80.3605	60.543	22.7416	2	1000000003
117.011	58.5724	10.6674	2	1000000004
118.567	44.6261	14.2501	2	1000000005
183.147	20.4072	13.8204	2	1000000006
46.3726	85.5102	18.3572	2	1000000007
62.0515	91.6005	23.234	2	1000000008
153.292	104.657	11.7818	2	1000000009
111.532	120.214	10.5431	2	1000000010
123.037	96.7114	13.6541	2	1000000013
93.541	116.495	13.3916	2	1000000011
105.283	156.401	13.3088	2	1000000012
147.786	93.8217	18.2855	2	1000000014
130.726	143.854	20.0869	2	1000000015
57.2171	186.831	13.1469	2	1000000016
28.9526	185.462	18.233	2	1000000017
156.196	191.874	10.7014	2	1000000018
122.21	169.131	19.2014	2	1000000019
107.911	164.679	31.9424	2	1000000020
44.5191	99.0477	17.484	2	1000000023
93.0777	171.597	18.7482	2	1000000027
35.0899	144.158	19.7605	2	1000000028
90.7598	93.1859	19.276	2	1000000022
88.372	122.883	25.3204	2	1000000032
155.323	76.8906	29	2	1000000024
6.13724	157.876	23.5719	2	1000000039
44.4582	60.1951	17.3788	2	1000000040
62.8631	77.071	10.754	3	1000000000
58.378	47.5444	19.6734	3	1000000001
69.5656	77.8046	18.4667	3	1000000002
118.533	57.096	11.629	3	1000000004
121.598	43.9492	14.9781	3	1000000005
83.2952	59.0302	23.5052	3	1000000003
183	18.7122	14.0469	3	1000000006
49.1374	85.1151	19.9719	3	1000000007
64.0987	89.9727	23.0567	3	1000000008
153.935	103.515	11.754	3	1000000009
113.037	119.14	10.9027	3	1000000010
95.4145	114.957	13.1996	3	1000000011
124.209	96.0015	14.161	3	1000000013
107.409	156.541	14.2515	3	1000000012
149.104	93.9059	18.3947	3	1000000014
132.471	142.579	20.8009	3	1000000015
58.986	186.405	12.8071	3	1000000016
30.225	184.902	18.5691	3	1000000017
157.35	190.189	10.5528	3	1000000018
125.841	169.145	19.0201	3	1000000019
110.103	164.57	31.8956	3	1000000020
45.5493	98.1789	19.2463	3	1000000023
96.3412	170.279	19.3408	3	1000000027
36.303	143.59	20.1752	3	1000000028
96.0258	92.0527	20.9723	3	1000000022
90.2402	122.327	25.7134	3	1000000032
156.972	78.915	31	3	1000000024
8.23497	157.392	25.7375	3	1000000039
46.3015	59.0183	18.2236	3	1000000040
63.0525	76.6869	11.8664	4	1000000000
60.8642	47.4819	19.9578	4	1000000001
70.7783	76.7541	19.7101	4	1000000002
121.468	57.1929	11.8375	4	1000000004
124.08	44.4261	15.2875	4	1000000005
86.1172	58.59	24.2109	4	1000000003
183.632	19.1706	13.3855	4	1000000006
50.1856	84.1212	20.6035	4	1000000007
67.6636	87.8455	22.7241	4	1000000008
113.812	119.502	11.6731	4	1000000010
153.505	100.492	12.2496	4	1000000009
126.327	96.3174	14.9044	4	1000000013
96.3557	115.331	14.3204	4	1000000011
109.074	157.612	14.6092	4	1000000012
150.557	94.0184	18.574	4	1000000014
133.116	141.877	21.9543	4	1000000015
59.9059	186.74	12.6034	4	1000000016
31.4698	185.292	19.1266	4	1000000017
158.182	190.579	10.0193	4	1000000018
127.415	168.03	19.3566	4	1000000019
112.467	164.627	33.1558	4	1000000020
47.5899	98.5283	19.4479	4	1000000023
98.3276	170.567	19.7772	4	1000000027
38.7901	143.664	20.4324	4	1000000028
98.9268	90.6749	24.1194	4	1000000022
91.2497	122.168	27.924	4	1000000032
159.467	77.6143	31	4	1000000024
9.95942	156.866	26.2558	4	1000000039
47.8075	59.7593	19.5894	4	1000000040
63.3296	75.9303	13.3784	5	1000000000
63.9741	46.8644	20.2788	5	1000000001
72.5111	76.5658	20.3956	5	1000000002
123.634	56.2439	12.262	5	1000000004
125.296	44.5981	15.969	5	1000000005
110.915	28.1084	24.3918	5	1000000021
88.6311	58.0158	24.4468	5	1000000003
185.152	17.6769	13.0871	5	1000000006
51.5423	83.2516	20.4987	5	1000000007
70.3054	86.9689	22.163	5	1000000008
114.233	118.963	11.6621	5	1000000010
97.3494	114.446	13.9095	5	1000000011
128.337	95.3762	15.0222	5	1000000013
109.988	157.758	15.1163	5	1000000012
151.972	94.3072	19.0107	5	1000000014
135.52	140.572	21.3849	5	1000000015
60.0478	185.347	13.0508	5	1000000016
32.5004	184.934	19.2998	5	1000000017
159.509	190.84	9.24136	5	1000000018
128.346	167.086	19.3193	5	1000000019
113.073	163.748	32.1511	5	1000000020
48.2452	97.1608	20.7748	5	1000000023
99.7887	169.898	20.4485	5	1000000027
40.3005	142.63	21.2613	5	1000000028
99.815	88.8319	24.3828	5	1000000022
91.6726	119.839	28.8284	5	1000000032
161.22	77.2889	33	5	1000000024
151.959	94.3206	18.9845	5	1000000009
10.9667	157.864	26.4861	5	1000000039
50.0014	59.5324	20.0465	5	1000000040
64.4932	75.1416	13.0317	6	1000000000
66.0084	47.7378	20.1099	6	1000000001
73.1323	78.7189	20.4888	6	1000000002
126.008	56.1724	12.798	6	1000000004
127.067	44.6184	15.6068	6	1000000005
109.679	23.4665	24.8218	6	1000000021
90.9367	58.2513	24.6052	6	1000000003
186.899	16.7915	13.0675	6	1000000006
52.3166	82.6803	21.2654	6	1000000007
72.3853	88.042	22.4121	6	1000000008
152.859	94.9588	13.8484	6	1000000009
113.971	118.327	12.147	6	1000000010
98.9347	114.569	14.9726	6	1000000011
111.261	157.731	15.8315	6	1000000012
128.848	94.3123	16.4783	6	1000000013
152.254	95.0254	20.7179	6	1000000014
137.273	140.661	20.8777	6	1000000015
60.9027	184.058	13.3453	6	1000000016
32.9088	185.262	19.7632	6	1000000017
160.887	191.408	9.6848	6	1000000018
130.073	166.166	19.0309	6	1000000019
113.568	163.148	30.8822	6	1000000020
48.8046	96.7651	21.1752	6	1000000023
101.034	169.442	20.476	6	1000000027
41.4286	142.776	22.1452	6	1000000028
102.413	87.6946	26.1175	6	1000000022
92.0859	114.794	28.7635	6	1000000032
162.809	76.1894	33	6	1000000024
12.7606	156.497	27.2982	6	1000000039
51.3098	59.7405	20.0156	6	1000000040
65.6168	74.7086	13.3654	7	1000000000
66.1147	47.7518	20.3222	7	1000000001
73.5282	77.9737	20.6247	7	1000000002
126.891	55.9019	13.5412	7	1000000004
128.418	43.7938	16.1772	7	1000000005
110.611	22.3851	24.9037	7	1000000021
92.5251	58.0223	25.4525	7	1000000003
187.902	15.2926	12.964	7	1000000006
53.6638	82.5699	20.6027	7	1000000007
74.2518	87.6435	23.548	7	1000000008
153.225	92.0096	13.8024	7	1000000009
114.75	117.837	12.7516	7	1000000010
99.9977	114.097	15.8017	7	1000000011
112.615	157.819	15.9363	7	1000000012
131.456	92.7222	17.0097	7	1000000013
153.883	94.2853	21.7933	7	1000000014
137.478	139.702	22.2839	7	1000000015
113.568	162.86	30.743	7	1000000020
61.6471	183.648	13.9598	7	1000000016
34.0434	184.622	20.0665	7	1000000017
161.794	189.709	9.41622	7	1000000018
130.435	166.44	19.1806	7	1000000019
51.1493	95.1175	22.1033	7	1000000023
102.999	169.637	21.2045	7	1000000027
42.185	142.563	22.4521	7	1000000028
104.101	86.7369	26.4506	7	1000000022
92.3572	111.802	28.8716	7	1000000032
163.873	75.8152	33	7	1000000024
12.8835	156.483	29.1977	7	1000000039
52.6395	59.5879	19.8658	7	1000000040
66.1421	74.3577	14.1954	8	1000000000
68.1543	47.6273	19.6362	8	1000000001
73.6618	77.8412	20.7581	8	1000000002
128.252	54.775	14.1951	8	1000000004
129.655	42.7766	16.7472	8	1000000005
112.73	22.7613	23.6597	8	1000000021
93.8803	57.6774	25.3023	8	1000000003
188.008	13.8773	12.8103	8	1000000006
54.697	82.6362	20.5621	8	1000000007
76.1656	86.7649	24.0924	8	1000000008
154.358	89.5124	13.615	8	1000000009
115.621	117.194	12.5351	8	1000000010
101.697	113.784	15.5385	8	1000000011
130.531	92.2997	16.658	8	1000000013
113.182	158.06	16.0473	8	1000000012
138.03	139.55	21.8347	8	1000000015
154.971	97.0717	23.3167	8	1000000014
112.812	161.482	29.4223	8	1000000020
108.906	85.5626	30.3975	8	1000000022
61.5457	182.188	14.2645	8	1000000016
35.2393	184.498	20.6665	8	1000000017
161.732	188.743	9.3215	8	1000000018
132.146	165.074	19.587	8	1000000019
52.4634	93.5666	22.6749	8	1000000023
104.908	169.252	21.5756	8	1000000027
43.0239	143.022	21.9565	8	1000000028
93.4218	111.943	29.2124	8	1000000032
166.274	77.1541	31	8	1000000024
13.4182	155.843	30.144	8	1000000039
54.3618	59.1733	19.9416	8	1000000040
65.8069	73.6998	14.424	9	1000000000
70.8686	47.0313	18.9253	9	1000000001
74.6742	78.0546	20.1906	9	1000000002
129.084	54.6687	15.1114	9	1000000004
133.166	42.3165	17.5377	9	1000000005
113.412	22.0489	21.6054	9	1000000021
95.1945	57.499	24.9453	9	1000000003
190.072	12.0511	12.9279	9	1000000006
55.0749	82.7992	21.0803	9	1000000007
77.4972	86.1582	23.9762	9	1000000008
155.543	88.0589	13.1898	9	1000000009
116.716	116.007	13.0602	9	1000000010
113.661	158.512	15.8255	9	1000000012
131.495	90.8425	16.9781	9	1000000013
104.025	112.691	17.1324	9	1000000011
138.31	139.109	21.5192	9	1000000015
156.847	98.4758	24.2742	9	1000000014
113.69	161.155	28.3122	9	1000000020
110.719	84.5373	30.4109	9	1000000022
61.9567	182.348	14.2113	9	1000000016
35.9793	184.983	20.3538	9	1000000017
161.697	188.236	9.18071	9	1000000018
133.633	165.232	19.143	9	1000000019
54.3295	93.0119	22.8151	9	1000000023
107.263	170.606	22.4723	9	1000000027
43.496	142.105	22.1727	9	1000000028
92.9251	111.213	28.4829	9	1000000032
169.14	77.1124	31	9	1000000024
14.9184	154.565	30.9558	9	1000000039
55.7437	58.0046	19.7328	9	1000000040
66.2764	73.6515	15.5183	10	1000000000
72.6157	46.7449	18.3775	10	1000000001
76.7419	77.417	20.6446	10	1000000002
130.705	54.357	15.2696	10	1000000004
135.423	42.0458	18.3502	10	1000000005
114.421	20.6765	21.3304	10	1000000021
96.2478	57.0773	25.9575	10	1000000003
191.504	11.6224	12.8576	10	1000000006
55.7154	83.3742	21.8002	10	1000000007
79.7137	85.5816	25.25	10	1000000008
156.603	86.0555	13.3867	10	1000000009
117.495	114.454	13.8323	10	1000000010
114.207	159.202	15.9473	10	1000000012
131.776	90.1316	17.1487	10	1000000013
104.656	112.282	18.8829	10	1000000011
156.744	99.455	23.8626	10	1000000014
139.012	137.243	22.2243	10	1000000015
115.056	161.089	27.9993	10	1000000020
111.681	83.5446	29.8741	10	1000000022
61.9891	181.637	14.4696	10	1000000016
36.5985	184.709	20.4565	10	1000000017
161.152	188.631	9.41036	10	1000000018
132.759	162.932	20.0676	10	1000000019
54.7858	92.7289	23.191	10	1000000023
107.854	170.739	22.4176	10	1000000027
44.6059	140.541	22.6222	10	1000000028
91.0793	111.121	27.5954	10	1000000032
172.265	78.2038	33	10	1000000024
15.7569	152.286	33.1356	10	1000000039
55.9404	57.7773	19.139	10	1000000040
67.1796	73.9225	15.4447	11	1000000000
74.2137	46.2371	18.1354	11	1000000001
78.8226	77.4826	20.7321	11	1000000002
132.047	53.0837	15.0314	11	1000000004
136.835	41.4362	17.56	11	1000000005
115.171	20.7372	20.9599	11	1000000021
95.4987	56.7194	27.5942	11	1000000003
113.292	81.1858	29.2925	11	1000000022
191.874	10.5312	12.4221	11	1000000006
56.355	83.5462	21.5519	11	1000000007
56.286	92.205	23.0627	11	1000000023
157.548	84.7511	13.3153	11	1000000009
117.942	113.845	13.0713	11	1000000010
131.839	89.4698	17.3779	11	1000000013
114.595	160.407	16.2156	11	1000000012
106.763	113.259	19.0954	11	1000000011
138.74	136.329	22.6319	11	1000000015
157.646	99.3632	25.1752	11	1000000014
81.654	84.7766	26.2546	11	1000000008
114.925	161.35	26.8487	11	1000000020
62.7858	181.276	14.9654	11	1000000016
37.7093	184.434	20.9342	11	1000000017
160.23	188.204	9.89799	11	1000000018
133.982	163.23	20.7437	11	1000000019
108.126	170.817	22.3521	11	1000000027
45.4819	139.546	22.7911	11	1000000028
90.0154	111.412	27.0386	11	1000000032
171.633	75.9935	31	11	1000000024
15.978	150.384	34.2664	11	1000000039
56.1094	56.9335	19.3465	11	1000000040
67.9353	72.9888	16.4419	12	1000000000
74.1025	44.114	18.1392	12	1000000001
79.7711	77.2239	21.3378	12	1000000002
134.231	51.3031	14.7998	12	1000000004
139.862	41.5822	16.927	12	1000000005
115.229	20.2345	21.4442	12	1000000021
94.805	56.4716	27.3516	12	1000000003
113.438	80.4817	30.2011	12	1000000022
191.874	10.5697	12.2202	12	1000000006
58.0275	83.7188	21.8096	12	1000000007
56.5234	91.6107	22.8805	12	1000000023
158.518	83.4507	13.0557	12	1000000009
118.15	111.742	12.9056	12	1000000010
130.12	88.3756	17.2528	12	1000000013
115.273	161.723	16.3625	12	1000000012
107.862	113.871	18.5693	12	1000000011
138.896	134.769	23.7216	12	1000000015
84.1458	86.248	27.4533	12	1000000008
159.17	99.6696	26.2675	12	1000000014
115.379	160.17	26.2947	12	1000000020
62.2403	180.384	15.6214	12	1000000016
36.7683	184.397	20.3717	12	1000000017
160.693	187.135	10.0299	12	1000000018
135.09	163.844	20.5932	12	1000000019
108.348	171.578	22.6491	12	1000000027
46.2663	138.699	22.071	12	1000000028
88.6071	111.216	26.5882	12	1000000032
171.694	72.4731	29	12	1000000024
17.1154	149.251	33.903	12	1000000039
56.9386	55.6744	19.4828	12	1000000040
75.7353	44.4294	17.2635	13	1000000001
69.1423	72.9015	17.9654	13	1000000000
135.586	50.459	15.0472	13	1000000004
141.105	42.0422	17.2475	13	1000000005
82.5353	77.4003	21.5783	13	1000000002
114.726	20.6479	22.1197	13	1000000021
94.2055	56.7083	25.045	13	1000000003
114.869	79.1542	31.0608	13	1000000022
191.874	10.224	12.2873	13	1000000006
61.0758	83.9563	20.9827	13	1000000007
58.9154	91.5116	21.8931	13	1000000023
159.302	81.5149	13.2063	13	1000000009
118.194	110.271	13.1124	13	1000000010
132.129	88.0921	16.9153	13	1000000013
109.547	113.503	17.5852	13	1000000011
140.847	132.586	22.3886	13	1000000015
116.542	159.898	24.932	13	1000000020
160.172	97.2897	26.0367	13	1000000014
86.2308	85.0828	28.2878	13	1000000008
62.9061	179.748	14.9955	13	1000000016
37.665	183.647	20.6934	13	1000000017
160.841	186.416	10.3005	13	1000000018
114.89	164.236	16.8434	13	1000000012
134.175	163.423	20.3198	13	1000000019
108.41	171.53	23.6332	13	1000000027
47.4261	137.621	21.845	13	1000000028
88.0131	109.534	25.5315	13	1000000032
171.84	69.561	29	13	1000000024
17.1485	147.654	32.3879	13	1000000039
57.1813	56.0068	20.2315	13	1000000040
77.3445	44.4917	17.5112	14	1000000001
69.8641	73.07	19.5665	14	1000000000
159.357	80.3094	12.8348	14	1000000009
136.857	50.1893	14.4696	14	1000000004
142.105	42.553	16.9302	14	1000000005
115.937	20.8887	21.2928	14	1000000021
86.7066	77.3556	22.1316	14	1000000002
91.941	56.7048	25.9873	14	1000000003
118.534	77.5787	31.8293	14	1000000022
191.874	10.087	12.6438	14	1000000006
173.465	69.5738	27.9723	14	1000000024
60.2317	91.3531	19.9924	14	1000000023
63.6019	83.8307	20.2172	14	1000000007
118.509	109.054	12.9038	14	1000000010
133.737	87.2292	17.0268	14	1000000013
111.479	112.38	17.2537	14	1000000011
140.579	131.205	21.4256	14	1000000015
159.898	96.3498	25.6099	14	1000000014
116.83	160.219	24.9989	14	1000000020
88.3331	84.1529	29.2379	14	1000000008
63.2556	179.537	15.1718	14	1000000016
37.236	183.534	21.3591	14	1000000017
160.899	185.243	10.0841	14	1000000018
114.696	165.169	16.765	14	1000000012
134.47	163.214	20.9332	14	1000000019
108.992	170.958	23.4438	14	1000000027
48.4128	136.908	21.5609	14	1000000028
88.5897	108.142	25.6547	14	1000000032
17.855	145.278	31.7552	14	1000000039
58.0188	55.2958	20.0933	14	1000000040
78.4672	44.623	18.2861	15	1000000001
70.1408	73.2927	19.7977	15	1000000000
160.884	79.1046	13.194	15	1000000009
138.932	49.7945	14.6225	15	1000000004
143.449	42.6323	17.7594	15	1000000005
116.603	21.667	20.6695	15	1000000021
87.7477	77.0773	21.2065	15	1000000002
90.0258	56.6386	26.4344	15	1000000003
191.874	10.6003	12.6251	15	1000000006
175.422	69.7396	27.6597	15	1000000024
64.706	82.9741	18.7139	15	1000000007
61.698	90.5364	18.7706	15	1000000023
118.774	108.313	13.499	15	1000000010
135.463	86.6654	17.0745	15	1000000013
118.769	108.315	13.5045	15	1000000011
135.292	162.298	20.9909	15	1000000019
140.856	129.698	22.1125	15	1000000015
160.224	95.4834	25.0198	15	1000000014
117.482	160.169	25.3676	15	1000000020
89.5989	84.2807	29.703	15	1000000008
62.1779	179.632	14.5287	15	1000000016
38.8582	183.157	22.1767	15	1000000017
161.768	184.196	10.5371	15	1000000018
114.899	170.004	17.3979	15	1000000012
121.246	77.6292	32.5768	15	1000000022
107.677	167.012	27.1188	15	1000000027
49.7047	135.604	21.8716	15	1000000028
87.9074	106.687	27.2157	15	1000000032
18.6262	144.076	31.0438	15	1000000039
59.6916	54.8664	19.4164	15	1000000040
78.6644	44.467	18.1668	16	1000000001
71.1839	74.3431	20.2174	16	1000000000
161.652	77.9043	12.7198	16	1000000009
140.183	50.1962	14.4855	16	1000000004
144.138	43.7226	17.5764	16	1000000005
117.155	22.9373	20.9734	16	1000000021
90.1007	75.4394	20.4576	16	1000000002
90.2359	56.6635	27.3385	16	1000000003
191.874	11.1054	12.9621	16	1000000006
176.71	70.5508	26.8711	16	1000000024
63.5801	90.5709	17.8396	16	1000000023
65.6854	81.5736	18.4592	16	1000000007
116.476	104.007	13.2717	16	1000000010
136.103	86.994	17.0257	16	1000000013
113.437	113.439	18.0245	16	1000000011
141.781	127.805	21.581	16	1000000015
135.779	161.498	20.3609	16	1000000019
162.13	95.2188	25.1115	16	1000000014
116.561	159.666	24.9667	16	1000000020
92.4982	85.5967	28.9296	16	1000000008
62.4637	179.01	16.2341	16	1000000016
38.8992	183.513	22.6734	16	1000000017
161.802	184.04	9.91733	16	1000000018
114.136	170.772	18.3631	16	1000000012
123.01	77.8099	34.0588	16	1000000022
106.006	166.582	27.2064	16	1000000027
51.1251	135.048	21.7175	16	1000000028
86.6231	105.392	28.5677	16	1000000032
19.384	142.169	29.8374	16	1000000039
59.6437	55.1452	19.4293	16	1000000040
80.2133	44.352	19.0778	17	1000000001
68.3672	81.3352	18.4239	17	1000000007
72.091	73.2875	21.9375	17	1000000000
142.404	50.0485	13.9497	17	1000000004
162.275	75.8463	12.354	17	1000000009
146.331	41.6253	17.5731	17	1000000005
116.799	20.3957	20.3199	17	1000000021
92.9001	73.6935	21.1939	17	1000000002
90.7412	55.9339	26.8446	17	1000000003
191.874	10.4397	12.9195	17	1000000006
178.058	69.382	28.1299	17	1000000024
66.3487	88.4867	18.4049	17	1000000023
116.264	101.417	12.9031	17	1000000010
136.49	85.587	16.5436	17	1000000013
115.489	112.313	17.4139	17	1000000011
143.761	125.192	21.7081	17	1000000015
136.157	158.97	20.4823	17	1000000019
162.592	92.7189	24.9993	17	1000000014
116.165	158.619	25.3562	17	1000000020
95.7412	84.4864	28.1927	17	1000000008
62.0103	177.944	16.2994	17	1000000016
10.5101	188.674	21.3204	17	1000000025
40.1344	182.674	23.1769	17	1000000017
22.9858	186.258	24.5099	17	1000000026
161.49	183.155	9.34407	17	1000000018
113.946	171.162	19.0226	17	1000000012
124.448	77.5189	35.426	17	1000000022
106.697	165.039	27.5394	17	1000000027
53.6134	132.158	21.0973	17	1000000028
82.682	102.174	30.3759	17	1000000032
166.272	173.217	31.3739	17	1000000035
18.4805	140.33	29.2937	17	1000000039
59.129	54.8668	19.2055	17	1000000040
80.7101	43.5518	19.277	18	1000000001
68.938	81.1353	18.597	18	1000000007
72.0597	72.5388	22.9462	18	1000000000
145.472	52.386	13.8253	18	1000000004
161.806	73.6372	12.4447	18	1000000009
147.437	41.9821	17.0309	18	1000000005
118.742	20.5814	19.6016	18	1000000021
93.8439	72.1385	22.0788	18	1000000002
89.9901	56.101	26.2849	18	1000000003
191.874	9.94869	12.9705	18	1000000006
178.989	69.6054	29.1769	18	1000000024
69.2008	88.2541	18.598	18	1000000023
116.769	100.1	12.9456	18	1000000010
136.67	86.4767	16.5862	18	1000000013
117.617	111.481	17.6969	18	1000000011
144.642	122.816	20.895	18	1000000015
162.861	91.2056	24.8655	18	1000000014
116.823	158.403	26.0423	18	1000000020
97.9951	83.9587	28.8766	18	1000000008
61.0187	177.919	16.8855	18	1000000016
10.8931	187.821	21.7975	18	1000000025
41.0968	183.312	23.5833	18	1000000017
23.8477	185.327	25.3993	18	1000000026
161.67	182.462	9.4099	18	1000000018
112.949	171.327	20.5044	18	1000000012
126.326	75.7822	35.6127	18	1000000022
105.343	164.806	28.3348	18	1000000027
55.6822	129.39	30.9862	18	1000000028
81.9367	102.965	29.9707	18	1000000032
167.33	171.499	32.2088	18	1000000035
138.65	157.79	23	18	1000000019
18.272	139.055	28.5899	18	1000000039
59.0301	55.1142	19.3467	18	1000000040
81.1956	41.8257	18.6258	19	1000000001
69.2634	79.7539	18.6041	19	1000000007
71.3624	71.597	23.3549	19	1000000000
160.587	69.9919	11.4638	19	1000000009
148.554	52.5192	12.9384	19	1000000004
149.729	40.2638	16.5878	19	1000000005
118.71	19.3089	18.3729	19	1000000021
95.146	70.2043	21.8052	19	1000000002
88.7533	55.5521	24.3688	19	1000000003
191.874	8.57854	12.8444	19	1000000006
71.3631	87.1984	19.1817	19	1000000023
116.57	98.589	12.5126	19	1000000010
138.002	86.8015	17.6595	19	1000000013
120.093	110.587	17.468	19	1000000011
144.93	121.16	20.8744	19	1000000015
140.257	158.187	22.9375	19	1000000019
161.017	89.6869	24.155	19	1000000014
116.821	158.021	26.7589	19	1000000020
98.8372	82.4589	28.9424	19	1000000008
60.9475	176.77	16.8069	19	1000000016
11.1965	187.301	21.2099	19	1000000025
41.3572	182.607	23.359	19	1000000017
24.3831	185.114	24.468	19	1000000026
161.135	181.621	10.6275	19	1000000018
113.837	171.216	19.7006	19	1000000012
105.828	166.322	25.6308	19	1000000027
127.83	73.8003	35.6176	19	1000000022
56.0327	129.936	21.3092	19	1000000028
81.9237	102.642	29.9666	19	1000000032
180.27	68.0569	27	19	1000000024
167.516	170.53	31.7942	19	1000000035
18.2396	138.069	28.38	19	1000000039
59.4794	54.842	18.8868	19	1000000040
69.9854	79.7697	18.9881	20	1000000007
71.8225	71.833	22.7788	20	1000000000
160.739	68.9518	11.6766	20	1000000009
150.013	51.9436	12.6836	20	1000000004
153.242	39.385	16.1282	20	1000000005
82.0847	41.2252	17.7581	20	1000000001
88.9593	55.8001	23.8323	20	1000000003
95.5413	69.2173	22.4816	20	1000000002
100.271	81.3279	27.2564	20	1000000008
191.874	8.06653	12.5304	20	1000000006
181.311	66.7012	27.4584	20	1000000024
69.9805	79.7907	18.9773	20	1000000023
117.306	96.2715	12.7332	20	1000000010
139.279	86.6537	17.3064	20	1000000013
121.729	110.139	18.1049	20	1000000011
145.698	119.999	20.9762	20	1000000015
162.241	90.1559	23.8682	20	1000000014
117.426	156.483	25.9991	20	1000000020
61.0605	176.559	16.2025	20	1000000016
11.3105	186.811	21.6206	20	1000000025
40.9934	183.011	22.5495	20	1000000017
24.849	184.371	24.1819	20	1000000026
161.95	179.99	10.4934	20	1000000018
112.943	170.972	20.4312	20	1000000012
104.976	165.603	25.2229	20	1000000027
128.198	73.8334	35.4793	20	1000000022
56.4771	129.908	22.2245	20	1000000028
79.8116	101.237	29.5249	20	1000000032
119.866	18.2155	17.3735	20	1000000021
167.169	169.811	31.8181	20	1000000035
141.316	155.17	23	20	1000000019
19.1081	137.714	27.4165	20	1000000039
60.5918	53.6389	17.785	20	1000000040
69.9135	79.3298	17.5275	21	1000000007
72.3278	71.6723	21.3575	21	1000000000
151.331	51.0101	12.4376	21	1000000004
160.106	67.4035	12.1487	21	1000000009
120.607	20.4536	16.7705	21	1000000021
155.069	38.6199	16.5131	21	1000000005
83.0957	40.4293	16.5432	21	1000000001
89.0581	54.6181	22.3565	21	1000000003
96.0428	66.7767	23.3069	21	1000000002
100.896	80.6319	26.6035	21	1000000008
191.874	8.92545	12.675	21	1000000006
182.548	65.4326	27.1192	21	1000000024
69.9067	79.3514	17.5153	21	1000000023
116.899	94.8542	12.6407	21	1000000010
140.332	85.9017	16.922	21	1000000013
122.18	109.601	18.3559	21	1000000011
145.456	117.367	19.7715	21	1000000015
162.886	89.0895	25.0599	21	1000000014
116.98	156.792	26.5115	21	1000000020
61.2336	174.587	15.7803	21	1000000016
40.95	182.278	21.8134	21	1000000017
10.9966	186.297	21.0648	21	1000000025
26.6902	182.622	23.4176	21	1000000026
162.422	179.241	10.842	21	1000000018
112.263	171.325	20.3382	21	1000000012
103.103	164.892	24.9288	21	1000000027
129.269	72.5114	34.7565	21	1000000022
56.9622	128.157	20.8363	21	1000000028
77.8447	99.7471	29.6788	21	1000000032
167.881	168.451	31.689	21	1000000035
142.285	153.702	23	21	1000000019
20.0692	136.368	28.7019	21	1000000039
60.7435	53.8563	17.2024	21	1000000040
69.2905	79.1286	16.9306	22	1000000007
72.8242	70.7788	20.9393	22	1000000000
152.423	50.837	13.127	22	1000000004
159.66	67.4136	13.6418	22	1000000009
121.207	20.8706	15.315	22	1000000021
156.906	37.4586	15.6458	22	1000000005
85.0718	40.2241	15.5814	22	1000000001
88.1501	54.8393	22.4955	22	1000000003
96.6506	65.5484	23.7651	22	1000000002
101.786	80.6656	26.4829	22	1000000008
191.874	8.99169	13.2979	22	1000000006
182.009	63.6533	27.059	22	1000000024
69.285	79.1449	16.9214	22	1000000023
60.2111	127.533	27.6968	22	1000000028
116.822	93.8072	12.8873	22	1000000010
140.265	86.3058	17.2233	22	1000000013
123.01	108.391	18.7763	22	1000000011
146.018	115.15	19.7161	22	1000000015
143.638	155.057	22.7561	22	1000000019
116.638	157.67	25.6583	22	1000000020
163.513	87.3343	25.1548	22	1000000014
61.0986	173.981	16.8993	22	1000000016
10.4894	186.523	21.381	22	1000000025
42.5109	180.907	22.6724	22	1000000017
27.7511	181.412	23.192	22	1000000026
161.836	178.04	10.9657	22	1000000018
111.925	171.397	19.8816	22	1000000012
103.119	163.753	24.2538	22	1000000027
131.649	71.878	35.5004	22	1000000022
77.3646	99.1724	28.6425	22	1000000032
168.396	166.947	31.9365	22	1000000035
20.7623	133.835	30.9668	22	1000000039
60.6744	52.62	16.7335	22	1000000040
69.2563	78.5761	16.8341	23	1000000007
73.9621	69.9348	20.9651	23	1000000000
87.0053	42.9986	13.8186	23	1000000001
153.377	49.1345	12.5956	23	1000000004
159.667	65.7955	13.8179	23	1000000009
120.339	21.36	15.3307	23	1000000021
157.543	35.7042	15.5558	23	1000000005
82.8858	39.0564	16.7798	23	1000000029
87.5109	54.9106	22.5189	23	1000000003
96.3096	65.4138	24.1814	23	1000000002
191.874	9.11356	14.6685	23	1000000006
180.916	62.5076	25.9545	23	1000000024
69.2543	78.5878	16.8266	23	1000000023
62.9203	125.899	26.9414	23	1000000028
117.084	93.6759	12.6616	23	1000000010
139.93	85.3539	16.7906	23	1000000013
122.865	106.646	19.2959	23	1000000011
145.452	113.121	18.3882	23	1000000015
143.779	154.407	22.5351	23	1000000019
103.305	162.568	24.8896	23	1000000027
102.467	81.6464	26.2333	23	1000000008
117.96	156.606	26.3587	23	1000000020
164.718	87.6648	26.5906	23	1000000014
60.7922	173.274	17.0472	23	1000000016
10.488	187.047	22.0482	23	1000000025
28.5723	180.732	23.3048	23	1000000026
43.1463	180.902	23.1912	23	1000000017
161.483	178.952	11.3938	23	1000000018
111.671	171.669	20.4286	23	1000000012
133.588	70.9596	36.2724	23	1000000022
77.8152	100.023	28.7382	23	1000000032
170.068	165.498	31.4793	23	1000000035
20.6853	130.81	32.6464	23	1000000039
61.0003	51.8082	16.4502	23	1000000040
43.1091	73.4373	13.0521	24	1000000030
69.5005	78.2808	16.8337	24	1000000007
74.8185	68.7116	21.4024	24	1000000000
87.7082	42.1707	13.6366	24	1000000001
153.648	47.6321	12.3609	24	1000000004
159.368	64.2466	13.7415	24	1000000009
120.086	22.467	14.1994	24	1000000021
158.044	33.3999	15.5371	24	1000000005
84.9451	38.3027	17.2013	24	1000000029
88.4538	53.8003	22.6887	24	1000000003
96.1695	64.9594	23.6736	24	1000000002
191.874	8.10175	14.9753	24	1000000006
181.174	63.1291	25.0172	24	1000000024
69.5003	78.291	16.8292	24	1000000023
62.8329	125.642	26.737	24	1000000028
116.594	93.4657	12.5559	24	1000000010
138.3	84.6188	16.0949	24	1000000013
143.124	111.297	17.3746	24	1000000015
122.555	104.965	18.5792	24	1000000011
144.837	154.225	22.6999	24	1000000019
104.844	81.6476	26.242	24	1000000008
118.596	156.726	26.3125	24	1000000020
102.317	162.015	26.2611	24	1000000027
163.575	87.5325	27.0746	24	1000000014
60.8659	172.709	18.2593	24	1000000016
10.9736	186.747	22.6979	24	1000000025
28.5678	180.32	24.7951	24	1000000026
43.512	181.362	24.6202	24	1000000017
162.168	179.261	11.5622	24	1000000018
119.701	191.874	16.3614	24	1000000031
111.881	171.299	20.8344	24	1000000012
134.577	71.1271	36.8742	24	1000000022
77.4168	99.8433	29.0095	24	1000000032
169.714	163.789	32.4132	24	1000000035
21.2286	129.31	31.6236	24	1000000039
62.505	51.7111	15.7415	24	1000000040
44.4516	73.0852	12.6228	25	1000000030
69.2736	77.9282	17.5416	25	1000000007
76.0947	68.3206	21.3587	25	1000000000
120.008	22.4598	13.6718	25	1000000021
88.6099	41.4901	13.1935	25	1000000001
153.823	45.8768	12.0684	25	1000000004
159.475	62.5672	13.504	25	1000000009
159.001	32.8009	15.6058	25	1000000005
86.2202	37.9315	16.8043	25	1000000029
89.9948	53.5346	22.5236	25	1000000003
95.8652	65.9373	23.5719	25	1000000002
191.874	7.45638	15.8276	25	1000000006
180.553	63.4954	25.1704	25	1000000024
69.2787	77.9343	17.5375	25	1000000023
61.9057	124.717	26.2335	25	1000000028
116.813	92.981	12.4504	25	1000000010
139.384	85.6281	15.968	25	1000000013
142.963	110.207	16.9617	25	1000000015
123.161	104.767	18.2955	25	1000000011
119.881	155.771	25.3473	25	1000000020
108.948	81.9581	26.6371	25	1000000008
102.997	161.77	26.7882	25	1000000027
163.935	86.4542	27.1119	25	1000000014
60.7684	171.482	18.303	25	1000000016
29.1972	179.574	23.9239	25	1000000026
9.88218	187.384	22.6648	25	1000000025
43.7116	181.199	24.4629	25	1000000017
162.756	179.133	12.7606	25	1000000018
122.332	191.874	16.039	25	1000000031
113.703	170.459	21.1808	25	1000000012
135.465	70.9978	36.5593	25	1000000022
75.998	100.466	29.5751	25	1000000032
170.181	163.94	33.2422	25	1000000035
146.98	152.04	23	25	1000000019
21.2598	127.86	30.9615	25	1000000039
62.8265	51.1255	15.9421	25	1000000040
44.451	74.043	11.7457	26	1000000030
68.8713	77.2418	17.2318	26	1000000007
77.6573	67.2365	20.2859	26	1000000000
119.481	22.3911	13.4614	26	1000000021
88.9897	41.1383	13.1793	26	1000000001
153.252	44.4053	12.1555	26	1000000004
159.145	59.7225	13.9515	26	1000000009
159.266	30.4327	15.585	26	1000000005
88.0703	37.0154	17.2066	26	1000000029
90.2	53.1126	21.9998	26	1000000003
96.032	65.6075	22.7283	26	1000000002
191.874	6.18513	15.9191	26	1000000006
182.745	65.0374	25.1677	26	1000000024
68.9185	77.2446	17.2274	26	1000000023
62.5478	126.215	27.5911	26	1000000028
117.442	93.0395	11.9502	26	1000000010
138.568	85.6027	15.4459	26	1000000013
142.751	110.01	16.2784	26	1000000015
123.145	105.409	18.1838	26	1000000011
148.086	151.916	21.3673	26	1000000019
109.868	81.5785	25.5598	26	1000000008
120.452	155.692	25.3265	26	1000000020
102.927	161.207	26.9904	26	1000000027
165.18	86.0368	27.9698	26	1000000014
61.4291	170.236	18.8055	26	1000000016
10.2487	187.338	23.4274	26	1000000025
29.4009	179.244	24.8097	26	1000000026
44.8592	181.2	24.9344	26	1000000017
124.273	189.568	17.2282	26	1000000031
113.693	170.978	21.0614	26	1000000012
162.966	181.201	13.8323	26	1000000018
135.75	70.5573	36.7971	26	1000000022
71.4804	99.0829	30.946	26	1000000032
171.269	161.114	33.5505	26	1000000035
21.5815	125.563	30.4548	26	1000000039
63.214	50.1301	15.6348	26	1000000040
44.1867	73.8357	11.6582	27	1000000030
68.2888	76.6722	17.9275	27	1000000007
78.5141	67.0955	20.6734	27	1000000000
119.512	21.967	12.8271	27	1000000021
88.3752	41.0763	12.9155	27	1000000001
154.203	44.2052	12.5364	27	1000000004
159.614	30.4917	15.3378	27	1000000005
160.072	58.0175	15.1086	27	1000000009
91.5797	35.4297	18.381	27	1000000029
90.8625	52.3523	22.55	27	1000000003
96.4326	66.6868	23.3664	27	1000000002
110.742	81.3927	25.6753	27	1000000008
191.874	5.42048	15.233	27	1000000006
182.193	64.4815	25.5358	27	1000000024
75.2815	81.5927	19.989	27	1000000023
64.5796	124.73	27.6427	27	1000000028
116.909	92.5077	12.2024	27	1000000010
138.501	84.8315	15.4597	27	1000000013
141.456	109.991	16.5217	27	1000000015
124.212	104.922	18.7348	27	1000000011
149.082	150.669	20.601	27	1000000019
121.194	154.964	25.1596	27	1000000020
102.981	162.451	26.3437	27	1000000027
164.857	84.0743	30.1319	27	1000000014
62.1844	168.954	19.0782	27	1000000016
10.2796	187.162	23.8596	27	1000000025
30.0453	178.462	25.093	27	1000000026
46.0849	180.06	24.8352	27	1000000017
124.849	189.119	18.5045	27	1000000031
113.389	171.623	20.7066	27	1000000012
163.065	180.336	13.3822	27	1000000018
136.132	69.7092	35.7306	27	1000000022
66.5141	97.2318	32.4415	27	1000000032
171.052	159.679	33.633	27	1000000035
21.7437	123.496	30.5231	27	1000000039
62.8713	48.6977	16.7109	27	1000000040
44.1862	73.4022	12.1617	28	1000000030
67.932	76.4438	18.2193	28	1000000007
79.951	66.9487	20.1321	28	1000000000
120.104	21.789	12.6177	28	1000000021
88.7476	40.9101	13.1537	28	1000000001
153.753	43.9043	12.8967	28	1000000004
160.194	30.0428	15.9646	28	1000000005
160.074	57.3475	15.3224	28	1000000009
93.2258	33.7979	17.8064	28	1000000029
91.939	51.6915	21.5071	28	1000000003
97.4742	67.8514	23.8516	28	1000000002
111.75	81.2009	25.6019	28	1000000008
191.874	5.355	13.9766	28	1000000006
179.787	64.1402	24.7562	28	1000000024
76.1996	82.2455	20.5187	28	1000000023
66.3942	122.681	27.6912	28	1000000028
116.904	92.3863	12.3254	28	1000000010
137.747	85.2005	15.9957	28	1000000013
140.551	109.26	17.0937	28	1000000015
124.836	105.303	18.6512	28	1000000011
150.325	148.526	19.8403	28	1000000019
120.521	155.562	25.1922	28	1000000020
102.153	162.072	27.1232	28	1000000027
62.5297	167.734	19.282	28	1000000016
30.0453	178.299	25.5846	28	1000000026
45.7877	179.607	25.115	28	1000000017
7.99331	188.214	24.6724	28	1000000025
126.564	189.626	17.4451	28	1000000031
113.607	171.493	20.9964	28	1000000012
163.43	180.512	12.7947	28	1000000018
134.505	69.1173	34.5463	28	1000000022
65.8058	97.503	32.6793	28	1000000032
164.701	84.6806	32.6262	28	1000000014
170.369	158.315	33.7294	28	1000000035
22.5598	122.574	30.0293	28	1000000039
63.2106	49.1707	17.5464	28	1000000040
45.2284	72.6216	12.2254	29	1000000030
68.1047	76.0278	18.0962	29	1000000007
80.8452	66.606	20.0172	29	1000000000
119.909	21.1224	11.6877	29	1000000021
89.6472	40.1561	12.6531	29	1000000001
154.071	43.261	12.6343	29	1000000004
160.624	29.8342	15.2429	29	1000000005
160.84	55.8111	14.7851	29	1000000009
94.493	33.0563	16.6917	29	1000000029
92.3024	51.6911	21.2866	29	1000000003
97.4377	68.8995	23.3633	29	1000000002
113.587	79.7311	24.0715	29	1000000008
191.874	4.62437	14.4532	29	1000000006
180.375	63.9822	23.7261	29	1000000024
76.5244	82.0088	20.1006	29	1000000023
68.5687	120.212	27.7317	29	1000000028
117.677	93.2572	11.8363	29	1000000010
138.82	84.2603	15.0427	29	1000000013
138.912	109.175	16.2673	29	1000000015
126.058	103.835	18.7126	29	1000000011
150.291	147.461	19.4394	29	1000000019
120.432	155.341	25.7615	29	1000000020
101.351	161.105	28.4788	29	1000000027
165.386	86.5493	31.9682	29	1000000014
63.2214	167.182	18.9238	29	1000000016
30.6118	177.132	25.3919	29	1000000026
45.672	179.27	24.7087	29	1000000017
7.1356	189.233	24.9999	29	1000000025
128.936	189.473	17.3224	29	1000000031
113.432	171.315	21.0858	29	1000000012
163.782	180.046	12.884	29	1000000018
133.805	68.3919	35.0445	29	1000000022
66.3384	98.4688	32.1679	29	1000000032
170.433	157.303	34.3347	29	1000000035
23.0053	122.529	30.9703	29	1000000039
64.2231	49.7872	18.3386	29	1000000040
46.0904	72.3294	12.4599	30	1000000030
68.9174	75.9324	18.2665	30	1000000007
120.991	19.2534	11.3024	30	1000000021
90.7517	40.1793	12.9314	30	1000000001
154.246	42.0808	12.7886	30	1000000004
160.767	29.5397	14.7757	30	1000000005
161.883	54.9136	14.7289	30	1000000009
94.9071	32.9857	16.3299	30	1000000029
92.5308	51.587	20.8211	30	1000000003
81.7768	66.6008	20.2321	30	1000000000
97.7168	69.1906	22.9392	30	1000000002
116.187	77.8663	23.0466	30	1000000008
191.874	4.4085	15.341	30	1000000006
181.95	64.1275	23.5718	30	1000000024
77.2956	81.7946	20.366	30	1000000023
69.0972	121.282	26.4324	30	1000000028
68.3792	97.567	31.1862	30	1000000032
118.002	93.1369	12.4147	30	1000000010
140.097	84.1317	14.9305	30	1000000013
140.533	108.264	16.8649	30	1000000015
127.663	105.021	18.1738	30	1000000011
151.24	146.471	20.0961	30	1000000019
120.674	154.123	25.5287	30	1000000020
100.698	160.929	27.7701	30	1000000027
166.704	87.2911	31.6556	30	1000000014
62.1322	168.764	17.865	30	1000000016
31.0262	176.499	25.1276	30	1000000026
45.0856	179.676	24.4945	30	1000000017
7.25647	189.408	25.1599	30	1000000025
130.366	190.202	17.0687	30	1000000031
114.406	170.939	21.2891	30	1000000012
165.084	180.523	12.354	30	1000000018
134.671	68.6055	35.1379	30	1000000022
171.494	156.406	34.5087	30	1000000035
23.1884	122.593	31.2248	30	1000000039
65.5972	49.9273	18.7243	30	1000000040
47.1486	71.9219	13.1487	31	1000000030
69.3773	76.3015	18.573	31	1000000007
76.8737	80.9033	20.6226	31	1000000023
121.203	18.2585	10.6863	31	1000000021
92.2042	40.5233	13.1406	31	1000000001
154.532	40.9426	12.6733	31	1000000004
161.566	29.4175	14.4056	31	1000000005
96.854	32.557	15.7636	31	1000000029
162.423	53.564	14.1979	31	1000000009
94.4431	51.2439	20.6824	31	1000000003
82.1872	66.9517	20.8467	31	1000000000
97.8176	69.6726	23.5187	31	1000000002
117.029	76.609	22.4217	31	1000000008
191.874	3.97289	13.7666	31	1000000006
182.981	62.8573	23.2115	31	1000000024
70.6177	120.624	26.3877	31	1000000028
68.7245	98.6026	30.4277	31	1000000032
118.317	92.719	13.0953	31	1000000010
140.523	84.6027	15.8414	31	1000000013
141.162	108.414	17.2374	31	1000000015
128.252	106.328	18.462	31	1000000011
152.132	145.149	19.5939	31	1000000019
122.852	153.346	22.6036	31	1000000020
101.07	161.175	27.8071	31	1000000027
167.691	87.3069	31.9175	31	1000000014
61.6422	169.697	18.084	31	1000000016
31.5553	176.14	24.5975	31	1000000026
45.1983	179.105	24.3137	31	1000000017
6.33242	189.45	25.3009	31	1000000025
132.686	190.371	17.0986	31	1000000031
114.499	170.623	20.1673	31	1000000012
166.073	179.947	12.9231	31	1000000018
135.425	67.7986	35.2859	31	1000000022
172.082	155.047	33.6659	31	1000000035
24.4452	123.123	31.2242	31	1000000039
66.4615	48.9279	18.3341	31	1000000040
47.6783	71.7966	13.0469	32	1000000030
69.1212	75.9737	18.8371	32	1000000007
77.1876	80.1078	21.0643	32	1000000023
122.52	17.3993	10.1705	32	1000000021
93.0835	40.5749	13.3434	32	1000000001
154.132	40.9975	12.6979	32	1000000004
162.13	29.2525	14.5059	32	1000000005
97.9823	31.915	15.6475	32	1000000029
162.775	52.3538	14.4704	32	1000000009
95.6084	50.9936	20.4965	32	1000000003
82.2017	67.239	20.8579	32	1000000000
118.073	76.1999	21.6235	32	1000000008
96.2698	71.6982	23.7234	32	1000000002
191.874	2.88682	12.4964	32	1000000006
183.607	60.961	23.8979	32	1000000024
71.8428	120.615	26.9264	32	1000000028
68.9127	99.5416	30.5858	32	1000000032
118.922	92.2408	13.0764	32	1000000010
140.058	84.2236	15.1079	32	1000000013
128.843	106.211	17.2639	32	1000000011
141.613	106.517	17.0181	32	1000000015
154.424	143.477	19.4815	32	1000000019
123.707	153.618	21.8537	32	1000000020
103.07	161.967	25.7718	32	1000000027
169.73	86.5348	31.1117	32	1000000014
62.5898	169.043	17.2705	32	1000000016
32.1188	175.273	24.1605	32	1000000026
45.5517	179.779	24.5761	32	1000000017
6.35137	190.238	25.2658	32	1000000025
136.968	191.236	13.4513	32	1000000031
116.089	170.844	20.9109	32	1000000012
167.086	180.176	12.947	32	1000000018
136.009	68.8094	35.5612	32	1000000022
172.445	154.193	33.8844	32	1000000035
24.5255	124.701	30.7685	32	1000000039
66.6189	48.2976	18.3191	32	1000000040
48.1776	71.2042	13.5274	33	1000000030
34.2374	57.5013	15.9643	33	1000000033
69.005	75.4715	19.8906	33	1000000007
78.4094	80.384	21.9102	33	1000000023
122.521	16.8903	10.3451	33	1000000021
154.618	39.2525	12.9291	33	1000000004
93.8594	40.8824	13.1636	33	1000000001
98.8656	33.0028	15.5382	33	1000000029
162.851	51.3657	14.4667	33	1000000009
97.0966	50.742	20.6901	33	1000000003
83.7676	66.507	21.8022	33	1000000000
120.156	76.701	21.3721	33	1000000008
98.0997	71.6396	23.519	33	1000000002
191.874	1.93333	11.703	33	1000000006
163.062	28.7565	14.5561	33	1000000005
182.354	61.9082	22.716	33	1000000024
72.5507	120.181	25.5367	33	1000000028
70.0628	100.067	29.8702	33	1000000032
141.581	81.5507	13.2577	33	1000000013
120.207	91.8447	13.6594	33	1000000010
142.075	105.421	17.4802	33	1000000015
129.673	108.362	16.8304	33	1000000011
156.154	141.567	19.3002	33	1000000019
127.143	89.585	20.7456	33	1000000034
125.559	153.773	21.0765	33	1000000020
104.123	161.018	26.8969	33	1000000027
171.202	86.9994	31.6091	33	1000000014
62.9558	169.609	17.2765	33	1000000016
33.0663	175.604	24.1866	33	1000000026
45.6176	181.659	24.5573	33	1000000017
6.62589	189.908	24.9945	33	1000000025
138.859	191.874	12.3633	33	1000000031
116.557	171.16	21.1755	33	1000000012
167.508	180.441	12.5701	33	1000000018
136.39	69.824	35.4245	33	1000000022
173.257	153.737	32.5076	33	1000000035
26.8844	129.964	31.6327	33	1000000039
67.4476	48.2058	18.9955	33	1000000040
48.335	71.5123	13.5993	34	1000000030
32.9589	56.4894	15.8121	34	1000000033
69.8559	75.324	20.3776	34	1000000007
79.3718	81.1843	22.2436	34	1000000023
123.662	16.2979	10.3385	34	1000000021
154.421	38.0531	12.6912	34	1000000004
142.439	79.366	12.9478	34	1000000013
103.717	32.3816	14.2305	34	1000000029
94.5499	40.0185	14.1061	34	1000000001
97.6235	49.6271	21.6009	34	1000000003
121.926	77.1193	21.1179	34	1000000008
85.2264	66.4221	22.2495	34	1000000000
99.008	72.6676	23.6703	34	1000000002
191.874	0.840313	12.4222	34	1000000006
163.889	26.9899	14.3752	34	1000000005
162.977	50.0596	14.7632	34	1000000009
181.654	59.2595	21.172	34	1000000024
74.1007	119.379	25.3321	34	1000000028
69.8446	100.833	29.8386	34	1000000032
120.893	91.3963	13.908	34	1000000010
143.159	104.164	17.5902	34	1000000015
129.675	109.03	16.7082	34	1000000011
129.014	87.2753	19.7365	34	1000000034
157.692	140.932	19.2755	34	1000000019
126.471	155.288	20.3874	34	1000000020
104.929	161.356	27.8829	34	1000000027
172.141	86.2602	30.8253	34	1000000014
61.9878	171.333	18.204	34	1000000016
33.2087	175.564	24.5331	34	1000000026
46.3893	181.643	24.7346	34	1000000017
7.33766	189.194	24.9812	34	1000000025
139.918	191.874	12.3019	34	1000000031
118.294	172.11	22.9172	34	1000000012
167.614	180.131	11.9109	34	1000000018
137.029	71.21	35.7211	34	1000000022
56.3234	111.425	27.4656	34	1000000037
174.31	153.893	32.4702	34	1000000035
27.4934	133.998	32.1443	34	1000000039
68.8871	48.4819	18.8504	34	1000000040
48.0005	71.3606	13.4792	35	1000000030
33.2098	55.1119	16.3748	35	1000000033
69.8048	74.2716	20.8771	35	1000000007
126.455	14.971	10.9779	35	1000000021
141.894	78.8614	11.4335	35	1000000013
105.167	32.3269	13.5943	35	1000000029
154.902	36.4561	12.2675	35	1000000004
94.1339	39.3515	13.5976	35	1000000001
98.8036	48.4618	20.8803	35	1000000003
124.044	76.5038	20.5674	35	1000000008
86.6646	66.004	22.4677	35	1000000000
100.435	72.7401	23.1785	35	1000000002
191.874	0.318199	12.1869	35	1000000006
165.757	25.6658	13.774	35	1000000005
163.847	49.3959	15.8339	35	1000000009
182.226	57.1077	20.3629	35	1000000024
79.7264	81.6581	23.1402	35	1000000023
75.5778	118.528	24.6168	35	1000000028
71.7857	100.469	29.6868	35	1000000032
121.535	90.1499	13.929	35	1000000010
143.821	102.998	16.9179	35	1000000015
130.189	107.997	16.6577	35	1000000011
130.411	86.6573	19.1968	35	1000000034
160.9	140.362	18.6075	35	1000000019
126.49	156.574	18.2755	35	1000000020
105.091	160.747	28.2692	35	1000000027
172.058	86.0536	29.3533	35	1000000014
63.1065	171.256	18.393	35	1000000016
35.0819	176.386	23.2957	35	1000000026
47.3754	181.62	24.7483	35	1000000017
7.19157	188.717	24.753	35	1000000025
141.081	191.874	11.8925	35	1000000031
118.509	173.31	22.7332	35	1000000012
167.769	180.355	11.7947	35	1000000018
137.001	71.8443	35.2466	35	1000000022
176.027	151.949	32.607	35	1000000035
56.7707	110.98	26.8416	35	1000000037
29.6895	133.665	31.4386	35	1000000039
69.6133	48.5617	19.1953	35	1000000040
48.3152	71.9319	13.5638	36	1000000030
33.3881	53.9691	16.1879	36	1000000033
71.0995	74.7977	21.1136	36	1000000007
129.55	14.0846	11.5398	36	1000000021
142.393	78.169	10.7222	36	1000000013
105.148	32.6732	13.0983	36	1000000029
154.841	35.2318	12.5207	36	1000000004
94.0586	40.3108	13.8581	36	1000000001
100.355	48.5984	20.7079	36	1000000003
126.627	76.0682	20.4554	36	1000000008
88.7787	66.7406	22.9883	36	1000000000
101.458	73.6704	22.6857	36	1000000002
191.874	0.318199	12.3569	36	1000000006
166.693	23.7073	13.4338	36	1000000005
163.795	47.6854	16.6594	36	1000000009
182.239	56.2727	19.462	36	1000000024
80.7228	82.1059	23.1754	36	1000000023
76.5169	118.936	23.6779	36	1000000028
71.5095	102.073	28.9967	36	1000000032
121.805	90.1533	14.0719	36	1000000010
144.42	101.847	17.0851	36	1000000015
131.128	108.718	16.2596	36	1000000011
130.868	86.3442	19.3605	36	1000000034
160.464	139.513	18.6532	36	1000000019
126.947	157.943	18.0019	36	1000000020
104.902	160.114	28.6813	36	1000000027
172.487	86.9034	28.8006	36	1000000014
174.474	154.232	31.3678	36	1000000035
63.0595	171.501	18.2408	36	1000000016
35.8252	175.846	23.3138	36	1000000026
48.4761	181.723	24.8756	36	1000000017
7.96251	187.26	25.3839	36	1000000025
141.108	191.874	12.3792	36	1000000031
118.488	174.586	23.7043	36	1000000012
168.215	180.867	12.2864	36	1000000018
137.614	73.1519	34.2283	36	1000000022
57.812	111.002	26.5941	36	1000000037
30.4328	133.628	30.5477	36	1000000039
69.9616	47.916	19.5095	36	1000000040
47.5987	71.8001	13.5884	37	1000000030
33.2904	52.9248	16.6248	37	1000000033
71.5629	73.9577	20.7563	37	1000000007
134.19	13.9461	11.4151	37	1000000021
155.342	34.7281	11.5919	37	1000000004
142.99	76.2191	10.1781	37	1000000013
104.487	33.3499	12.8557	37	1000000029
94.7564	40.572	13.3195	37	1000000001
130.46	75.0196	19.398	37	1000000008
102.927	47.4006	20.0208	37	1000000003
89.6035	65.8814	22.3817	37	1000000000
103.274	71.4787	22.2195	37	1000000002
82.1171	81.4555	22.9874	37	1000000023
191.874	0.318199	11.4303	37	1000000006
167.743	22.4659	12.618	37	1000000005
164.593	46.4381	16.9154	37	1000000009
180.666	55.3608	17.945	37	1000000024
77.6384	118.729	22.843	37	1000000028
71.1691	101.774	29.0678	37	1000000032
123.037	89.5153	13.9278	37	1000000010
131.759	108.065	15.7651	37	1000000011
146.993	99.9622	16.8519	37	1000000015
126.71	158.255	17.861	37	1000000020
131.862	84.9938	19.164	37	1000000034
161.827	138.466	18.2895	37	1000000019
102.991	159.372	29.5431	37	1000000027
172.225	85.2718	27.5783	37	1000000014
175.09	152.99	29.5401	37	1000000035
63.9723	170.402	17.6971	37	1000000016
37.6046	176.038	21.4051	37	1000000026
50.7207	181.742	24.163	37	1000000017
7.34797	187.192	24.5653	37	1000000025
141.251	191.874	13.6877	37	1000000031
117.007	176.358	23.0156	37	1000000012
168.39	181.337	13.0479	37	1000000018
140.667	72.1879	34.3708	37	1000000022
58.0756	110.717	26.884	37	1000000037
30.8398	132.811	29.1507	37	1000000039
70.8225	46.9189	19.8716	37	1000000040
47.5114	72.3391	14.0447	38	1000000030
33.056	51.4897	16.9462	38	1000000033
71.9142	73.4497	20.9166	38	1000000007
143.917	77.024	9.06608	38	1000000013
135.799	14.0961	11.2738	38	1000000021
155.974	35.1577	11.3806	38	1000000004
104.308	33.9372	12.7263	38	1000000029
95.906	40.3162	13.295	38	1000000001
133.101	74.2678	18.2672	38	1000000008
105.635	46.4534	19.0852	38	1000000003
91.3947	64.3714	21.4207	38	1000000000
103.865	70.3579	21.4808	38	1000000002
83.9499	80.103	22.903	38	1000000023
191.874	0.318199	11.6217	38	1000000006
168.722	22.999	12.9162	38	1000000005
180.929	54.2101	17.539	38	1000000024
165.206	45.0062	18.3285	38	1000000009
79.5028	118.343	22.7757	38	1000000028
67.7381	101.822	29.4493	38	1000000032
123.971	89.674	13.6395	38	1000000010
130.876	108.571	15.2596	38	1000000011
147.389	99.1191	16.3782	38	1000000015
126.864	159.55	17.0084	38	1000000020
132.007	86.3483	19.5974	38	1000000034
161.385	137.85	18.1197	38	1000000019
100.886	157.639	30.0523	38	1000000027
171.16	86.4112	26.8326	38	1000000014
174.428	152.707	28.8647	38	1000000035
64.3525	170.795	17.329	38	1000000016
38.9994	176.498	21.2669	38	1000000026
52.522	181.032	23.3754	38	1000000017
7.98472	186.68	24.0444	38	1000000025
140.649	191.874	12.9629	38	1000000031
116.642	177.724	24.4432	38	1000000012
168.915	181.618	13.1549	38	1000000018
142.347	71.47	35.2089	38	1000000022
58.3262	110.39	27.1411	38	1000000037
31.8972	131.133	27.0705	38	1000000039
71.1769	45.5597	20.4288	38	1000000040
46.8902	73.2939	14.4599	39	1000000030
32.9718	50.7472	17.1524	39	1000000033
71.7651	72.8623	21.0971	39	1000000007
144.363	75.6762	9.67647	39	1000000013
136.591	13.2669	11.4414	39	1000000021
155.454	34.2145	11.6866	39	1000000004
102.849	33.9849	12.8381	39	1000000029
95.9785	40.0461	13.0532	39	1000000001
106.478	41.0756	15.0089	39	1000000003
136.946	72.5358	18.4037	39	1000000008
92.9223	64.3082	21.1508	39	1000000000
104.699	70.3506	22.1445	39	1000000002
86.7899	78.8024	23.6455	39	1000000023
109.187	54.1219	30.688	39	1000000036
191.874	0.318199	11.56	39	1000000006
168.264	21.9103	13.6586	39	1000000005
180.074	53.5454	17.6316	39	1000000024
165.394	44.0052	19.4357	39	1000000009
80.4652	117.564	22.3475	39	1000000028
66.6413	101.782	28.5246	39	1000000032
124.973	89.6824	13.593	39	1000000010
147.449	98.2672	15.2674	39	1000000015
131.585	108.241	14.9233	39	1000000011
126.545	160.61	16.5912	39	1000000020
132.638	87.7	18.9967	39	1000000034
98.2705	157.784	28.8267	39	1000000027
163.388	135.51	17.6055	39	1000000019
168.662	87.081	26.5278	39	1000000014
176.175	152.576	27.4046	39	1000000035
64.2129	171.423	17.4137	39	1000000016
38.5545	176.004	20.9478	39	1000000026
53.1441	180.547	23.2784	39	1000000017
8.63768	185.759	24.2856	39	1000000025
140.106	191.874	13.403	39	1000000031
116.751	177.77	23.9196	39	1000000012
169.505	182.063	13.1029	39	1000000018
145.079	71.2667	35.5216	39	1000000022
58.4367	109.61	25.7888	39	1000000037
33.0498	131.463	25.3689	39	1000000039
71.0034	44.5724	20.5086	39	1000000040
46.9351	73.2389	14.9286	40	1000000030
33.1465	50.5992	18.0446	40	1000000033
71.6978	71.7367	20.7795	40	1000000007
144.867	74.2781	9.84262	40	1000000013
137.084	10.3549	11.6453	40	1000000021
154.484	33.0034	11.5508	40	1000000004
102.347	33.6203	12.8557	40	1000000029
96.4732	39.789	12.9514	40	1000000001
107.066	41.0165	14.7765	40	1000000003
93.7598	62.4476	19.9922	40	1000000000
139.387	71.523	18.6286	40	1000000008
104.722	68.3546	21.5303	40	1000000002
90.3807	77.2959	24.4519	40	1000000023
109.013	55.2594	29.5041	40	1000000036
191.874	0.318199	11.362	40	1000000006
168.543	20.1893	13.6265	40	1000000005
181.194	50.7101	17.9128	40	1000000024
169.326	35.399	14.5687	40	1000000009
80.6309	117.759	23.2535	40	1000000028
66.0837	101.719	27.0888	40	1000000032
125.5	88.9623	13.7016	40	1000000010
147.431	97.1422	13.7214	40	1000000015
132.029	107.405	15.0254	40	1000000011
126.913	160.407	17.196	40	1000000020
133.734	89.1342	19.8942	40	1000000034
94.9546	157.593	27.0129	40	1000000027
164.626	133.204	17.0996	40	1000000019
167.68	87.0976	25.3458	40	1000000014
176.193	152.285	26.9975	40	1000000035
63.9298	170.911	16.5027	40	1000000016
38.7202	176.308	20.791	40	1000000026
53.6829	180.819	22.2681	40	1000000017
9.15313	185.049	23.9507	40	1000000025
139.919	191.874	13.7656	40	1000000031
116.25	177.609	23.8799	40	1000000012
169.202	180.865	13.1865	40	1000000018
146.167	70.6221	35.6689	40	1000000022
58.8046	108.702	24.8212	40	1000000037
35.2038	131.354	24.5241	40	1000000039
71.0797	44.1671	21.3886	40	1000000040
47.2072	73.3745	14.0468	41	1000000030
33.8541	49.1425	19.3221	41	1000000033
72.0185	70.1307	19.4536	41	1000000007
146.551	74.0644	9.78225	41	1000000013
137.675	9.51225	10.7768	41	1000000021
153.976	32.9283	11.5684	41	1000000004
99.745	34.2292	13.1462	41	1000000029
97.1587	39.4611	12.4495	41	1000000001
116.791	43.4832	17.7501	41	1000000003
94.3891	60.9418	19.2335	41	1000000000
140.503	70.8849	18.6747	41	1000000008
105.371	67.8097	20.8944	41	1000000002
93.7726	78.2661	24.7012	41	1000000023
109.283	55.0477	30.7595	41	1000000036
191.874	0.318199	11.3532	41	1000000006
168.727	19.3141	13.1062	41	1000000005
181.627	50.4961	17.6119	41	1000000024
166.832	39.995	21.0931	41	1000000009
65.6219	101.644	25.2299	41	1000000032
126.437	89.0565	13.5334	41	1000000010
149.085	97.6688	14.2431	41	1000000015
132.869	107.191	14.9592	41	1000000011
126.806	160.595	17.4438	41	1000000020
135.713	93.3443	20.3926	41	1000000034
82.1291	116.635	22.7807	41	1000000028
94.5407	156.522	24.8794	41	1000000027
166.527	130.455	16.5701	41	1000000019
177.026	151.222	25.7259	41	1000000035
166.032	84.9286	27.1603	41	1000000014
63.6234	170.862	16.1164	41	1000000016
41.8444	175.961	19.2596	41	1000000026
53.6909	180.904	21.2887	41	1000000017
9.59172	184.811	24.1792	41	1000000025
139.101	191.874	14.5327	41	1000000031
116.218	178.289	23.289	41	1000000012
168.765	181.297	13.9059	41	1000000018
147.627	68.9292	34.6511	41	1000000022
58.7899	108.33	24.4909	41	1000000037
36.4401	131.473	23.8022	41	1000000039
72.6192	41.6672	22.4469	41	1000000040
48.2897	73.8172	13.4207	42	1000000030
33.5845	48.8533	19.1619	42	1000000033
72.0731	67.5467	18.6143	42	1000000007
148.023	73.6521	9.67769	42	1000000013
139.166	9.41523	11.1421	42	1000000021
153.945	32.3127	11.2155	42	1000000004
97.6562	38.8629	11.9873	42	1000000001
98.4032	32.3021	13.6915	42	1000000029
120.599	41.7602	16.1764	42	1000000003
140.605	69.8648	17.9134	42	1000000008
95.5834	59.8875	19.165	42	1000000000
106.088	67.7162	20.9253	42	1000000002
96.1997	78.7693	25.6597	42	1000000023
109.478	54.1917	30.7946	42	1000000036
191.874	0.318199	12.0644	42	1000000006
168.39	17.518	13.1442	42	1000000005
182.747	50.1215	17.391	42	1000000024
166.988	39.0703	20.2975	42	1000000009
64.6034	99.7428	22.9353	42	1000000032
128.243	89.1995	12.6648	42	1000000010
149.46	96.8996	14.444	42	1000000015
134.177	107.798	14.5633	42	1000000011
126.646	160.658	17.6551	42	1000000020
136.215	96.7034	20.6617	42	1000000034
84.2039	115.551	21.3744	42	1000000028
94.1503	155.267	25.5382	42	1000000027
166.6	130.315	18.2413	42	1000000019
178.804	149.705	25.8579	42	1000000035
166.892	83.4603	27.6842	42	1000000014
65.1864	168.297	15.5974	42	1000000016
38.9176	173.968	23.7359	42	1000000026
54.044	179.641	21.1857	42	1000000017
9.71913	184.328	23.7151	42	1000000025
138.848	191.874	14.3009	42	1000000031
115.681	178.571	22.6767	42	1000000012
168.996	180.917	14.0263	42	1000000018
150.086	67.763	34.7465	42	1000000022
59.2485	107.059	23.1288	42	1000000037
37.1422	130.645	24.2172	42	1000000039
73.0437	40.2159	23.0263	42	1000000040
48.2131	73.5435	13.4754	43	1000000030
71.5694	65.9756	19.6587	43	1000000007
34.8094	47.0596	20.3606	43	1000000033
140.573	8.47822	10.9298	43	1000000021
153.155	33.1143	10.7176	43	1000000004
149.752	72.7027	10.4094	43	1000000013
97.288	31.8169	13.7829	43	1000000029
97.9346	38.9512	12.048	43	1000000001
125.492	40.0945	14.6989	43	1000000003
95.444	59.5238	19.7783	43	1000000000
141.329	68.7612	18.6421	43	1000000008
106.819	68.0781	22.0914	43	1000000002
97.4674	78.7252	27.2582	43	1000000023
107.828	54.6763	30.6233	43	1000000036
191.874	0.318199	10.8334	43	1000000006
169.427	16.5501	12.6652	43	1000000005
182.934	49.4783	17.939	43	1000000024
167.007	38.3438	19.2877	43	1000000009
64.1022	99.3156	23.1178	43	1000000032
129.406	88.634	13.0009	43	1000000010
150.641	96.6447	14.0858	43	1000000015
134.697	107.954	14.0734	43	1000000011
127.021	161.121	17.0505	43	1000000020
136.275	98.9389	21.6998	43	1000000034
84.2496	114.524	20.665	43	1000000028
94.3241	154.092	25.5382	43	1000000027
165.946	128.676	18.1211	43	1000000019
177.809	148.593	25.528	43	1000000035
166.906	82.8687	27.194	43	1000000014
66.5723	166.886	16.0549	43	1000000016
39.6183	174.372	22.5555	43	1000000026
54.5944	178.732	20.904	43	1000000017
10.0496	184.084	23.6058	43	1000000025
138.54	191.874	14.1084	43	1000000031
116.638	179.781	21.704	43	1000000012
168.959	180.718	13.632	43	1000000018
152.625	67.6366	35.6156	43	1000000022
58.4218	107.026	22.2849	43	1000000037
37.2769	131.13	23.435	43	1000000039
72.9541	38.9933	23.345	43	1000000040
49.1721	73.8977	13.7653	44	1000000030
35.6428	47.4296	19.2667	44	1000000033
72.5223	63.8821	20.9975	44	1000000007
142.569	7.61983	10.7248	44	1000000021
153.757	31.6327	10.4952	44	1000000004
97.3657	39.0087	11.8053	44	1000000001
149.997	71.0026	10.5389	44	1000000013
95.5486	31.126	13.2684	44	1000000029
126.572	38.5614	14.3954	44	1000000003
95.5379	58.652	19.8777	44	1000000000
141.408	69.6857	19.0044	44	1000000008
107.084	67.5248	22.7031	44	1000000002
99.7673	78.5721	27.8568	44	1000000023
105.066	55.5614	29.2726	44	1000000036
191.874	0.318199	10.4561	44	1000000006
169.457	15.647	12.9027	44	1000000005
168.393	37.2505	18.6965	44	1000000009
185.108	48.1379	18.6341	44	1000000024
64.1849	98.9675	23.2439	44	1000000032
130.41	87.5722	13.454	44	1000000010
149.727	95.8632	13.4683	44	1000000015
135.209	106.649	13.6169	44	1000000011
127.675	161.98	16.9756	44	1000000020
85.6985	114.943	19.6082	44	1000000028
136.364	100.164	21.8734	44	1000000034
94.1998	152.01	27.2528	44	1000000027
166.529	128.97	17.9809	44	1000000019
178.392	147.292	24.9877	44	1000000035
166.952	81.633	27.1082	44	1000000014
66.9535	166.781	16.7181	44	1000000016
48.8176	172.126	19.1932	44	1000000026
55.0734	179.049	21.0936	44	1000000017
10.5567	184.299	23.7145	44	1000000025
139.59	188.296	13.4661	44	1000000031
115.357	181.341	20.9814	44	1000000012
168.638	180.441	13.2641	44	1000000018
155.536	67.4242	36.7099	44	1000000022
58.8939	105.457	22.5569	44	1000000037
37.9805	131.08	24.3336	44	1000000039
73.4404	37.5709	24.6082	44	1000000040
49.3234	74.2731	14.0092	45	1000000030
36.2736	47.5306	18.6976	45	1000000033
72.5717	62.1642	21.4335	45	1000000007
145.401	7.60739	10.5236	45	1000000021
153.952	31.8806	10.7033	45	1000000004
96.4724	39.3051	11.2325	45	1000000001
150.455	69.4539	11.0119	45	1000000013
93.8449	30.0028	13.6143	45	1000000029
128.134	36.646	13.8885	45	1000000003
94.9814	58.4521	18.5592	45	1000000000
142.819	68.2046	19.1348	45	1000000008
106.465	67.107	21.6411	45	1000000002
100.854	79.0684	27.3015	45	1000000023
105.512	55.1993	28.3744	45	1000000036
191.874	0.318199	9.40436	45	1000000006
170.302	14.5949	12.8116	45	1000000005
170.159	30.5908	11.8768	45	1000000009
185.826	47.0688	18.3625	45	1000000024
166.802	80.5755	26.5509	45	1000000014
63.9248	98.2012	22.5515	45	1000000032
131.139	86.687	12.5988	45	1000000010
149.749	94.916	13.6519	45	1000000015
135.855	105.368	13.5342	45	1000000011
127.897	162.192	16.9557	45	1000000020
87.6411	114.772	19.5327	45	1000000028
136.056	101.06	22.0399	45	1000000034
94.6319	149.269	29.4037	45	1000000027
168.006	126.417	17.1677	45	1000000019
179.735	147.207	23.3963	45	1000000035
66.8595	166.479	16.4638	45	1000000016
54.8266	178.967	20.9886	45	1000000017
10.4318	184.333	23.203	45	1000000025
140.662	187.247	13.1404	45	1000000031
114.226	182.343	19.7734	45	1000000012
170.413	179.354	12.5216	45	1000000018
156.971	67.4961	37.9669	45	1000000022
41.3879	174.155	22.6633	45	1000000026
57.5165	105.424	16.8616	45	1000000037
39.2107	131.411	24.589	45	1000000039
74.1587	36.7528	25.4359	45	1000000040
49.1466	74.6308	13.4377	46	1000000030
38.0058	46.6908	18.5071	46	1000000033
72.3648	61.2599	21.6433	46	1000000007
146.144	8.16259	10.5247	46	1000000021
154.249	31.0244	11.2125	46	1000000004
96.683	38.8273	11.6308	46	1000000001
150.426	68.9527	11.3933	46	1000000013
92.3472	28.933	15.4229	46	1000000029
128.219	35.2768	14.1585	46	1000000003
93.4504	57.2706	18.0906	46	1000000000
143.331	65.8173	21.0431	46	1000000008
105.84	67.3358	21.7041	46	1000000002
105.199	54.5884	27.1932	46	1000000036
101.075	79.6486	26.6663	46	1000000023
191.874	0.318199	9.44108	46	1000000006
171.426	13.7181	12.794	46	1000000005
170.055	29.0552	13.2381	46	1000000009
186.899	45.5512	19.0757	46	1000000024
168.517	80.7331	27.0327	46	1000000014
64.3953	98.2023	22.9114	46	1000000032
131.987	86.1837	12.6679	46	1000000010
151.313	94.5307	13.7843	46	1000000015
137.17	104.339	13.6055	46	1000000011
128.8	160.473	17.4222	46	1000000020
89.9618	115.541	18.7183	46	1000000028
136.268	101.086	21.6966	46	1000000034
95.5969	148.596	28.4758	46	1000000027
168.895	124.848	16.7269	46	1000000019
181.151	145.552	23.9104	46	1000000035
66.9901	166.252	17.0212	46	1000000016
51.4567	168.577	19.4377	46	1000000026
55.0273	177.91	21.4743	46	1000000017
10.4501	184.116	22.9175	46	1000000025
140.885	186.798	13.7249	46	1000000031
113.609	182.638	19.0731	46	1000000012
169.868	179.405	12.448	46	1000000018
157.056	67.7974	37.8978	46	1000000022
57.7392	106.418	15.5694	46	1000000037
39.6828	130.316	24.6273	46	1000000039
73.7808	36.6056	26.2447	46	1000000040
49.0693	74.9944	12.9739	47	1000000030
39.3639	46.5101	18.1101	47	1000000033
73.096	58.9538	22.4493	47	1000000007
146.518	7.45284	10.8077	47	1000000021
154.632	30.0187	10.8395	47	1000000004
96.4827	37.8766	11.2175	47	1000000001
151.122	67.3657	12.3663	47	1000000013
90.9153	27.7645	15.8738	47	1000000029
127.186	33.0008	14.3508	47	1000000003
93.4113	55.2391	17.1864	47	1000000000
105.511	65.9973	21.6804	47	1000000002
143.371	63.7792	22.8116	47	1000000008
105.498	53.4325	26.5519	47	1000000036
101.588	78.5118	26.2989	47	1000000023
191.874	0.318199	9.02982	47	1000000006
172.232	12.6417	12.7151	47	1000000005
169.995	25.8813	14.3166	47	1000000009
188.82	43.7526	20.0068	47	1000000024
169.537	78.5821	26.0782	47	1000000014
63.3232	96.1179	22.8202	47	1000000032
133.11	84.7112	12.5729	47	1000000010
137.979	102.945	13.5493	47	1000000011
152.796	93.9123	14.1686	47	1000000015
129.475	158.413	17.9229	47	1000000020
92.0388	114.801	18.8223	47	1000000028
137.469	98.8104	21.747	47	1000000034
96.8467	148.312	27.1512	47	1000000027
169.886	123.717	17.1414	47	1000000019
180.565	145.216	23.6054	47	1000000035
68.3193	166.201	18.261	47	1000000016
53.7835	167.99	20.7239	47	1000000026
55.5644	178.688	21.723	47	1000000017
11.211	183.703	23.246	47	1000000025
142.181	186.76	14.4865	47	1000000031
114.1	182.204	18.96	47	1000000012
170.9	178.504	12.5882	47	1000000018
156.895	68.0399	36.8913	47	1000000022
63.3235	96.1195	22.8199	47	1000000037
40.232	129.792	24.6746	47	1000000039
72.4869	35.9585	26.9658	47	1000000040
48.7991	76.0853	13.3278	48	1000000030
39.3984	47.0222	17.3896	48	1000000033
74.0213	58.4031	21.4131	48	1000000007
148.684	5.94894	10.9443	48	1000000021
96.7757	36.7727	11.3009	48	1000000001
155.241	28.2186	12.2328	48	1000000004
153.067	66.6969	13.8864	48	1000000013
90.5552	26.6061	15.7872	48	1000000029
127.779	30.778	14.7302	48	1000000003
93.2995	53.9275	16.2695	48	1000000000
105.24	66.2174	22.0842	48	1000000002
144.349	61.3025	24.4903	48	1000000008
103.703	79.098	25.9305	48	1000000023
106.176	52.3251	26.3281	48	1000000036
173.99	10.6199	14.1851	48	1000000005
168.184	31.086	19.8282	48	1000000009
189.58	42.9673	20.6142	48	1000000024
171.176	78.2107	26.2513	48	1000000014
58.6964	93.4058	21.6388	48	1000000032
133.264	84.0931	12.5545	48	1000000010
139.909	101.76	12.871	48	1000000011
153.551	91.017	14.8802	48	1000000015
93.4229	113.974	19.1434	48	1000000028
129.944	157.288	18.1998	48	1000000020
138.445	97.4152	21.3132	48	1000000034
97.8562	147.2	27.744	48	1000000027
170.797	123.977	16.6261	48	1000000019
179.224	144.659	23.746	48	1000000035
68.3331	166.75	18.4607	48	1000000016
54.4642	167.192	21.1502	48	1000000026
55.9172	177.723	20.9762	48	1000000017
11.8099	183.448	22.9365	48	1000000025
142.357	187.407	15.1806	48	1000000031
113.555	182.153	18.5865	48	1000000012
171.087	178.369	12.2661	48	1000000018
158.161	67.338	37.3473	48	1000000022
59.4062	105.618	15.1887	48	1000000037
40.3965	128.465	25.4117	48	1000000039
73.4802	35.8725	26.7774	48	1000000040
49.5594	75.9993	13.0169	49	1000000030
40.4805	46.0914	18.1909	49	1000000033
74.2681	57.2706	21.1772	49	1000000007
149.761	4.31696	10.6822	49	1000000021
156.232	28.8015	11.7828	49	1000000004
98.306	37.0925	11.5796	49	1000000001
90.9307	25.5566	15.8193	49	1000000029
129.681	26.9397	14.1661	49	1000000003
93.6086	53.281	15.7891	49	1000000000
154.031	67.2558	14.5926	49	1000000013
106.43	64.9573	21.7423	49	1000000002
106.522	52.5663	25.9501	49	1000000036
144.828	61.3268	25.2664	49	1000000008
103.541	78.1907	24.7984	49	1000000023
174.527	11.4747	13.536	49	1000000005
166.689	32.1015	19.5709	49	1000000009
188.502	42.3268	19.5842	49	1000000024
171.519	77.5599	25.5355	49	1000000014
57.5993	91.8846	23.0762	49	1000000037
57.5914	91.8858	23.0809	49	1000000032
73.4727	157.252	26.8405	49	1000000038
135.001	82.9799	13.765	49	1000000010
141.251	100.831	13.484	49	1000000011
153.901	90.8615	14.5616	49	1000000015
130.236	155.591	17.5436	49	1000000020
95.4484	113.589	19.1358	49	1000000028
138.435	95.916	21.0165	49	1000000034
98.1534	147.756	26.3368	49	1000000027
172.07	123.827	18.1231	49	1000000019
178.83	142.519	24.6519	49	1000000035
70.2038	164.989	18.4712	49	1000000016
54.7587	165.527	20.7229	49	1000000026
56.9121	177.388	21.2128	49	1000000017
12.2936	183.352	22.995	49	1000000025
143.429	187.285	15.2178	49	1000000031
113.009	182.551	18.658	49	1000000012
170.542	176.752	12.4884	49	1000000018
157.93	64.4802	36.6899	49	1000000022
40.7117	126.241	25.092	49	1000000039
73.3813	36.1163	26.9213	49	1000000040
49.5834	76.3579	12.9314	50	1000000030
41.6542	45.3451	17.7266	50	1000000033
74.5142	55.6102	21.0374	50	1000000007
150.786	0.318199	10.8475	50	1000000021
156.411	28.3036	11.3735	50	1000000004
98.2485	36.231	11.7168	50	1000000001
156.16	67.3816	13.7055	50	1000000013
129.001	24.4345	14.4	50	1000000003
93.6478	52.7462	14.9316	50	1000000000
91.2568	23.9874	16.6197	50	1000000029
108.28	64.424	21.063	50	1000000002
106.823	52.125	25.8278	50	1000000036
145.667	62.0745	25.6871	50	1000000008
105.91	77.3047	24.8937	50	1000000023
175.04	11.3903	13.4482	50	1000000005
165.359	32.7249	19.4183	50	1000000009
188.673	40.78	20.331	50	1000000024
171.732	74.8717	25.1427	50	1000000014
64.7591	94.2536	19.3469	50	1000000037
57.7915	91.486	22.9657	50	1000000032
72.9471	158.523	25.0366	50	1000000038
135.982	83.0763	13.7828	50	1000000010
142.196	100.261	12.8821	50	1000000011
155.611	89.1982	14.7039	50	1000000015
131.804	154.185	17.7387	50	1000000020
97.5861	114.227	19.0002	50	1000000028
139.551	96.5261	20.2578	50	1000000034
100.807	147.682	25.5502	50	1000000027
173.659	124.226	19.0658	50	1000000019
179.429	141.009	23.532	50	1000000035
71.5875	163.727	17.8336	50	1000000016
55.2145	165.125	20.6296	50	1000000026
57.4534	176.88	20.7887	50	1000000017
12.3954	183.479	23.1621	50	1000000025
143.146	185.978	15.5646	50	1000000031
112.994	182.396	18.9899	50	1000000012
170.218	176.586	11.7424	50	1000000018
158.48	63.4443	35.7832	50	1000000022
41.0783	124.266	25.0536	50	1000000039
72.5783	36.4776	27.6767	50	1000000040
49.7964	76.0016	13.0511	51	1000000030
43.5337	43.4771	18.0675	51	1000000033
74.7434	54.2989	21.1584	51	1000000007
151.833	0.318199	10.9994	51	1000000021
155.637	27.3908	10.8691	51	1000000004
97.1668	34.8393	12.1587	51	1000000001
128.779	23.3801	14.2393	51	1000000003
94.2559	51.6855	14.278	51	1000000000
156.905	66.6285	14.037	51	1000000013
91.691	23.3134	18.4163	51	1000000029
110.104	63.7808	20.8283	51	1000000002
106.507	51.6624	25.3285	51	1000000036
146.026	61.8031	25.8779	51	1000000008
107.534	75.6689	26.2791	51	1000000023
175.952	10.4079	14.2539	51	1000000005
163.759	31.3574	19.558	51	1000000009
187.006	41.0352	19.937	51	1000000024
170.929	73.3527	22.7165	51	1000000014
66.0676	92.8433	19.1385	51	1000000037
57.2492	89.3412	22.7534	51	1000000032
73.2187	154.584	25.3116	51	1000000038
135.403	82.8454	13.0646	51	1000000010
156.233	87.4654	13.3922	51	1000000015
143.741	100.268	12.5566	51	1000000011
132.025	153.357	17.6043	51	1000000020
140.337	95.5674	19.9149	51	1000000034
98.9509	114.842	18.7117	51	1000000028
102.03	147.426	24.6132	51	1000000027
178.745	141.392	23.1086	51	1000000035
70.9539	163.878	17.3124	51	1000000016
54.5918	165.826	19.6772	51	1000000026
58.4865	175.569	20.9253	51	1000000017
12.255	183.959	22.9245	51	1000000025
111.684	183.622	18.2323	51	1000000012
142.753	185.36	18.0095	51	1000000031
171.095	175.866	11.4297	51	1000000018
160.485	60.7534	36.2389	51	1000000022
173.927	123.704	23	51	1000000019
42.1251	122.137	24.8034	51	1000000039
64.8357	40.2802	23.0934	51	1000000040
49.3792	75.3762	12.7506	52	1000000030
44.6001	41.1424	18.5575	52	1000000033
76.3083	52.1013	21.5345	52	1000000007
152.651	0.318199	11.7524	52	1000000021
155.927	27.3545	10.881	52	1000000004
97.992	34.6307	11.9888	52	1000000001
130.054	21.4257	13.8417	52	1000000003
96.5555	50.7699	13.614	52	1000000000
160.213	66.4783	13.98	52	1000000013
92.5692	21.7402	18.9013	52	1000000029
162.621	31.6547	19.6714	52	1000000009
113.372	62.7188	19.2513	52	1000000002
106.345	51.4057	24.9251	52	1000000036
108.074	75.4333	25.397	52	1000000023
146.677	61.2829	27.1768	52	1000000008
176.316	9.78574	14.1577	52	1000000005
185.477	40.8568	20.6972	52	1000000024
172.811	71.5234	21.395	52	1000000014
74.228	161.998	16.8988	52	1000000016
67.0631	92.371	18.6107	52	1000000037
58.9118	85.6036	21.8109	52	1000000032
72.9652	153.412	24.8498	52	1000000038
136.626	82.8051	12.7017	52	1000000010
157.144	87.3375	12.7948	52	1000000015
146.386	100.827	13.5036	52	1000000011
142.121	93.6099	19.7484	52	1000000034
100.673	114.534	18.5953	52	1000000028
131.202	152.017	18.9107	52	1000000020
104.573	147.391	24.5647	52	1000000027
177.897	140.807	23.3863	52	1000000035
54.6122	164.149	18.9938	52	1000000026
12.4829	183.604	22.2275	52	1000000025
142.857	183.842	18.4398	52	1000000031
110.994	184.672	18.6293	52	1000000012
171.422	174.883	11.4009	52	1000000018
162.047	59.6443	36.4668	52	1000000022
54.8796	176.685	19	52	1000000017
173.251	123.314	21	52	1000000019
42.2136	121.035	24.3881	52	1000000039
69.6022	36.4285	27.9021	52	1000000040
49.3919	75.3523	12.857	53	1000000030
45.5877	39.9619	17.9589	53	1000000033
78.4122	49.3742	22.4394	53	1000000007
153.178	0.318199	11.9268	53	1000000021
156.339	26.7153	10.7352	53	1000000004
130.075	19.8799	13.1464	53	1000000003
97.5641	34.137	12.1667	53	1000000001
97.5236	50.5643	12.8106	53	1000000000
161.054	65.2175	12.4991	53	1000000013
93.1225	21.058	19.0764	53	1000000029
162.51	30.1713	19.8494	53	1000000009
114.901	61.4188	18.1225	53	1000000002
110.278	69.1339	27.1324	53	1000000023
107.04	51.7604	26.7084	53	1000000036
147.766	60.6627	27.9095	53	1000000008
177.669	8.2331	14.1697	53	1000000005
174.308	69.3504	19.4363	53	1000000014
184.119	40.9552	20.581	53	1000000024
74.4512	162.352	16.8712	53	1000000016
67.3908	91.9457	18.6977	53	1000000037
60.667	82.6103	21.702	53	1000000032
73.1422	151.94	24.4104	53	1000000038
136.782	82.6781	11.8397	53	1000000010
158.251	86.0026	11.4527	53	1000000015
146.745	101.327	13.5237	53	1000000011
142.635	89.8972	18.2417	53	1000000034
101.489	113.465	18.8058	53	1000000028
131.817	152.33	21.2109	53	1000000020
106.169	146.709	24.2256	53	1000000027
177.834	138.768	24.509	53	1000000035
54.7701	162.935	18.1454	53	1000000026
13.9792	183.509	21.6962	53	1000000025
142.1	183.664	18.3568	53	1000000031
109.757	184.701	19.0268	53	1000000012
170.665	176.002	11.3961	53	1000000018
163.108	56.9454	37.0972	53	1000000022
57.6319	176.411	19	53	1000000017
171.935	121.196	23	53	1000000019
40.9115	117.56	26.4049	53	1000000039
68.9867	36.4653	28.4161	53	1000000040
49.4425	74.6141	12.517	54	1000000030
45.3869	37.0471	18.4382	54	1000000033
79.0092	48.9308	21.5461	54	1000000007
62.0098	81.0422	21.6241	54	1000000032
157.156	25.5765	10.9453	54	1000000004
162.292	64.5581	11.6153	54	1000000013
131.465	16.895	12.1067	54	1000000003
96.5527	32.633	12.281	54	1000000001
97.5827	50.5842	12.2966	54	1000000000
116.127	60.0205	16.579	54	1000000002
93.8745	20.1783	20.239	54	1000000029
113.764	69.9214	25.8913	54	1000000023
109.557	52.2416	28.4735	54	1000000036
150.715	60.2876	28.6925	54	1000000008
177.848	6.94099	14.398	54	1000000005
174.887	67.9037	19.3392	54	1000000014
164.902	27.0288	20.7154	54	1000000009
183.204	42.2406	21.114	54	1000000024
74.8414	162.779	16.9459	54	1000000016
68.2701	90.9679	18.1276	54	1000000037
55.6199	162.087	18.4753	54	1000000026
72.3129	151.278	23.7552	54	1000000038
137.419	82.1537	11.436	54	1000000010
159.949	85.0669	10.8953	54	1000000015
146.622	101.189	12.8554	54	1000000011
144.176	87.8936	19.2936	54	1000000034
102.114	111.98	18.2517	54	1000000028
132.513	151.898	22.1887	54	1000000020
106.534	147.892	25.0619	54	1000000027
176.139	137.363	24.5318	54	1000000035
14.559	183.064	22.1635	54	1000000025
143.154	182.447	16.3811	54	1000000031
108.903	184.106	18.8516	54	1000000012
169.865	175.81	10.6081	54	1000000018
164.655	54.055	35.8098	54	1000000022
57.4689	176.62	19	54	1000000017
173.585	120.124	25	54	1000000019
41.2283	115.334	25.1412	54	1000000039
68.8435	36.0408	28.8819	54	1000000040
48.6954	75.1217	12.2665	55	1000000030
45.9188	36.0808	19.2476	55	1000000033
79.3427	48.8599	20.6306	55	1000000007
157.252	26.0625	11.1555	55	1000000004
98.4632	51.1237	11.7438	55	1000000000
131.813	14.8251	12.3935	55	1000000003
96.268	31.5452	12.41	55	1000000001
116.75	59.4809	16.7419	55	1000000002
95.2421	19.0576	20.2601	55	1000000029
108.068	76.3848	24.3093	55	1000000023
110.775	51.5579	29.5743	55	1000000036
150.117	58.8989	30.7679	55	1000000008
165.448	64.3406	11.3467	55	1000000013
177.515	6.55343	15.2551	55	1000000005
176.313	66.0214	18.9145	55	1000000014
167.551	24.3949	21.3297	55	1000000009
182.482	42.5806	21.5411	55	1000000024
68.7003	90.6049	17.7969	55	1000000037
55.6336	161.32	18.1042	55	1000000026
61.5477	81.6265	22.2189	55	1000000032
72.7868	148.831	24.2929	55	1000000038
137.147	82.3435	10.9446	55	1000000010
159.217	84.7079	10.9838	55	1000000015
147.761	101.673	12.5756	55	1000000011
103.41	110.502	18.873	55	1000000028
146.509	87.0921	20.4743	55	1000000034
133.625	152.589	22.3836	55	1000000020
105.556	146.805	24.6854	55	1000000027
175.482	137.983	23.2837	55	1000000035
74.3735	163.395	16.9694	55	1000000016
15.6297	183.152	22.2593	55	1000000025
142.977	182.216	14.705	55	1000000031
108.257	181.335	18.9547	55	1000000012
168.9	175.952	10.6286	55	1000000018
163.071	52.4261	34.8996	55	1000000022
57.4689	176.62	19	55	1000000017
173.207	121.217	27	55	1000000019
41.879	114.426	25.6375	55	1000000039
68.4608	37.327	28.331	55	1000000040
48.5017	74.9261	11.715	56	1000000030
47.0048	34.9508	18.3252	56	1000000033
80.0143	48.6735	20.8538	56	1000000007
62.2481	78.401	22.2512	56	1000000032
133.348	14.1088	11.5373	56	1000000003
157.468	25.4983	11.5254	56	1000000004
99.1644	50.8546	11.8461	56	1000000000
97.1396	30.5858	12.6615	56	1000000001
117.563	58.7161	16.8839	56	1000000002
95.6136	17.8472	20.4477	56	1000000029
109.357	76.8054	23.7723	56	1000000023
111.547	50.8692	29.1209	56	1000000036
167.7	62.5357	10.3802	56	1000000013
177.538	6.81114	15.211	56	1000000005
176.572	64.991	19.013	56	1000000014
181.727	42.7123	20.7628	56	1000000024
69.6954	89.4837	17.6333	56	1000000037
56.152	159.363	17.239	56	1000000026
74.4868	162.108	16.3092	56	1000000016
72.9767	147.978	23.9853	56	1000000038
138.073	82.2299	10.425	56	1000000010
160.046	82.6441	10.6166	56	1000000015
148.046	102.243	12.7869	56	1000000011
105.167	108.95	19.2009	56	1000000028
147.692	85.6564	20.1679	56	1000000034
134.835	151.404	22.7851	56	1000000020
106.517	145.233	24.6196	56	1000000027
175.737	137.881	23.0477	56	1000000035
16.1292	183.81	21.9518	56	1000000025
144.661	181.851	13.2229	56	1000000031
108.71	178.809	18.5228	56	1000000012
168.748	175.304	10.6037	56	1000000018
148.817	56.5257	32.4342	56	1000000008
163.182	50.3963	34.7809	56	1000000022
167.685	20.8022	21	56	1000000009
57.8985	177.148	17	56	1000000017
42.8157	114.149	25.1022	56	1000000039
67.5638	36.8351	28.4955	56	1000000040
48.3968	74.4068	11.5212	57	1000000030
52.5113	32.9647	17.1817	57	1000000033
61.7451	77.136	22.6299	57	1000000032
160.506	81.0348	9.93234	57	1000000015
133.341	12.488	11.6921	57	1000000003
157.423	25.0141	11.4798	57	1000000004
99.552	49.9457	11.9526	57	1000000000
97.7458	29.6533	13.2865	57	1000000001
117.255	57.9287	17.197	57	1000000002
95.5987	17.4273	20.3119	57	1000000029
81.5665	46.9378	21.7741	57	1000000007
110.016	76.4866	23.4529	57	1000000023
110.859	49.2537	28.4873	57	1000000036
170.149	60.2038	9.64324	57	1000000013
177.846	5.49811	14.6942	57	1000000005
177.148	61.9116	18.94	57	1000000014
180.841	41.0313	20.3178	57	1000000024
75.8133	159.748	15.445	57	1000000016
[truncated: 1,374 more rows]

## Sheet: NCadM-2-NcadMSide
Position
Position X	Position Y	Position Z	Time	TrackID
77.2443	48.4047	19.3191	1	1000000000
153.592	40.8621	16.1471	1	1000000001
112.756	78.7638	17.4908	1	1000000002
147.298	48.4716	20.9464	1	1000000003
125.114	63.4522	21.6543	1	1000000004
99.1516	44.2159	22.9741	1	1000000005
144.017	69.3798	28.9364	1	1000000006
178.467	40.4477	17.9216	1	1000000007
181.694	76.0662	16.1375	1	1000000008
69.6509	141.451	9.71467	1	1000000009
52.5426	97.4409	16.284	1	1000000010
132.101	158.832	17.6752	1	1000000011
105.381	99.2212	26.4288	1	1000000012
78.0445	191.873	20.2407	1	1000000013
177.77	186.884	25.2564	1	1000000014
144.188	26.6457	37.3233	1	1000000015
177.627	43.4723	36.2295	1	1000000016
111.737	148.062	34.7703	1	1000000017
127.377	44.3011	20.6472	1	1000000018
183.384	108.419	32.4619	1	1000000019
76.7732	46.8064	18.5795	2	1000000000
153.693	41.5546	15.6457	2	1000000001
112.405	78.6917	18.0507	2	1000000002
145.88	47.9311	20.6911	2	1000000003
125.039	64.0912	21.8018	2	1000000004
100.207	44.3218	22.4963	2	1000000005
143.011	69.7851	29.3419	2	1000000006
181.574	76.0442	15.9922	2	1000000008
179.715	39.6074	17.1014	2	1000000007
69.5904	141.391	10.6651	2	1000000009
52.8648	95.5607	16.762	2	1000000010
131.105	158.209	17.4106	2	1000000011
106.131	98.3682	25.5597	2	1000000012
77.4891	191.873	20.088	2	1000000013
178.315	189.036	25.2054	2	1000000014
144.22	25.2634	36.8852	2	1000000015
178.557	42.8525	35.9135	2	1000000016
110.673	150.573	34.7184	2	1000000017
127.103	44.5258	20.9463	2	1000000018
185.659	110.493	32.0304	2	1000000019
77.3167	46.0113	16.6335	3	1000000000
154.918	42.3258	15.963	3	1000000001
111.596	78.7642	17.8712	3	1000000002
101.298	45.4982	21.7573	3	1000000005
144.753	48.3092	20.4132	3	1000000003
125.097	64.0162	21.6924	3	1000000004
142.612	69.7271	28.7524	3	1000000006
181.333	75.2347	15.4247	3	1000000008
180.74	38.8929	16.262	3	1000000007
69.9627	140.725	9.51665	3	1000000009
52.7024	94.6217	17.1772	3	1000000010
130.142	157.29	16.5738	3	1000000011
107.199	97.0221	24.9035	3	1000000012
78.776	191.873	20.9606	3	1000000013
178.539	190.634	24.6083	3	1000000014
143.838	25.2688	35.4691	3	1000000015
178.379	42.9278	36.5001	3	1000000016
109.662	151.97	33.9957	3	1000000017
127.688	45.8965	19.874	3	1000000018
186.869	111.142	31.6006	3	1000000019
173.906	115.515	12.9368	3	1000000020
76.4977	44.9491	16.3105	4	1000000000
156.038	43.0116	15.6852	4	1000000001
110.86	79.2574	18.6816	4	1000000002
101.571	46.8213	21.6453	4	1000000005
143.24	47.4425	20.8446	4	1000000003
124.344	64.5598	21.4512	4	1000000004
141.603	69.5216	28.9159	4	1000000006
180.989	38.1688	15.241	4	1000000007
181.004	75.5175	15.5868	4	1000000008
70.0877	139.986	9.90991	4	1000000009
53.9121	94.4506	16.888	4	1000000010
128.997	155.873	16.2669	4	1000000011
106.898	96.8564	25.3798	4	1000000012
79.451	189.628	20.5446	4	1000000013
178.237	190.201	23.8607	4	1000000014
143.907	23.3585	35.0963	4	1000000015
179.189	41.8238	35.9387	4	1000000016
109.909	152.745	33.2436	4	1000000017
127.413	46.9209	19.089	4	1000000018
186.631	111.941	31.1634	4	1000000019
174.363	115.458	13.3878	4	1000000020
74.7828	44.1376	16.5993	5	1000000000
157.222	43.4137	15.9979	5	1000000001
126.383	47.7087	17.4935	5	1000000018
110.563	79.1752	18.3916	5	1000000002
101.874	47.2332	20.3906	5	1000000005
141.838	47.3239	20.3735	5	1000000003
123.877	65.3073	20.279	5	1000000004
141.326	69.2581	29.4447	5	1000000006
181.249	37.8084	15.3433	5	1000000007
180.924	76.1436	15.4475	5	1000000008
69.954	139.973	9.08651	5	1000000009
54.5234	91.5828	17.0783	5	1000000010
128.322	155.535	15.8304	5	1000000011
107.917	96.7144	25.5176	5	1000000012
82.7754	187.342	19.9223	5	1000000013
178.898	191.873	24.8056	5	1000000014
144.311	22.78	34.9143	5	1000000015
179.054	40.2172	36.1601	5	1000000016
109.305	154.258	32.9461	5	1000000017
177.893	181.19	33.76	5	1000000021
186.426	112.097	32.8898	5	1000000019
174.505	115.623	13.6341	5	1000000020
75.1881	44.7509	15.5068	6	1000000000
157.724	43.7215	15.7388	6	1000000001
110.442	78.7085	18.6011	6	1000000002
102.314	48.1621	20.3238	6	1000000005
140.787	48.7767	20.1721	6	1000000003
123.89	65.7559	20.3083	6	1000000004
141.115	68.2978	30.4979	6	1000000006
180.281	76.3862	15.795	6	1000000008
182.814	37.817	16.3684	6	1000000007
69.451	139.502	9.17165	6	1000000009
54.0592	90.4424	16.6419	6	1000000010
128.068	155.431	15.986	6	1000000011
108.402	94.9354	25.6053	6	1000000012
83.8463	185.474	21.0852	6	1000000013
180.022	191.873	24.833	6	1000000014
141.854	23.9399	33.6462	6	1000000015
179.112	37.847	36.5301	6	1000000016
108.976	157.123	32.4264	6	1000000017
139.493	183.458	38.3094	6	1000000022
176.425	180.641	33.7538	6	1000000021
126.064	49.4864	16.5431	6	1000000018
185.515	113.348	33.0021	6	1000000019
174.48	117.185	14.5594	6	1000000020
74.3953	43.7269	16.8872	7	1000000000
157.862	43.8282	15.9856	7	1000000001
126.655	51.188	16.4083	7	1000000018
108.301	79.0343	17.8952	7	1000000002
140.22	48.216	18.8902	7	1000000003
102.771	48.8944	19.8031	7	1000000005
122.542	66.528	19.4335	7	1000000004
140.808	67.8719	30.7477	7	1000000006
179.529	76.5179	15.6791	7	1000000008
183.653	36.6914	16.1903	7	1000000007
68.9115	139.738	8.8869	7	1000000009
52.9121	90.2246	15.9597	7	1000000010
127.504	155.499	16.4832	7	1000000011
108.084	94.126	25.6381	7	1000000012
87.2546	183.137	22.9779	7	1000000013
178.327	191.873	25.2276	7	1000000014
142.828	23.8836	35.0159	7	1000000015
179.663	36.5051	36.4621	7	1000000016
108.244	157.454	33.0578	7	1000000017
139.313	183.563	37.4726	7	1000000022
173.686	179.855	33.6933	7	1000000021
184.275	112.667	31.3729	7	1000000019
174.549	116.148	13.3738	7	1000000020
74.3216	43.5831	16.5988	8	1000000000
157.514	43.7863	15.3983	8	1000000001
140.974	48.7986	17.4827	8	1000000003
126.902	52.1945	16.1426	8	1000000018
106.974	78.8439	17.7712	8	1000000002
103.008	49.3165	19.3041	8	1000000005
122.567	66.9071	18.4158	8	1000000004
182.184	36.6288	15.869	8	1000000007
178.453	76.857	15.7408	8	1000000008
68.6802	139.7	9.25254	8	1000000009
51.9662	90.2612	15.5949	8	1000000010
126.068	155.718	17.8304	8	1000000011
107.583	94.1348	25.9086	8	1000000012
90.6753	182.498	23.2804	8	1000000013
177.442	191.873	26.0373	8	1000000014
141.959	23.4566	33.9584	8	1000000015
140.46	68.2454	32.2264	8	1000000006
179.141	34.6541	36.8778	8	1000000016
108.189	157.116	33.5473	8	1000000017
139.233	182.218	34.9056	8	1000000022
171.964	179.423	33.4941	8	1000000021
183.418	115.132	31.0762	8	1000000019
173.78	116.491	13.2139	8	1000000020
74.636	43.2792	16.7975	9	1000000000
158.276	44.2731	14.9363	9	1000000001
141.075	48.8458	16.3426	9	1000000003
126.821	54.5234	16.421	9	1000000018
121.43	66.9723	17.8411	9	1000000004
105.218	79.001	17.5365	9	1000000002
103.178	49.1425	18.7477	9	1000000005
181.206	36.4686	15.8747	9	1000000007
178.506	78.518	16.0562	9	1000000008
68.01	139.591	9.04653	9	1000000009
51.3757	90.0706	14.7773	9	1000000010
126.338	155.325	18.2706	9	1000000011
107.134	93.4172	26.7751	9	1000000012
93.3959	182.46	23.3095	9	1000000013
175.595	191.873	25.5088	9	1000000014
142.388	22.8906	33.1322	9	1000000015
141.728	67.4073	32.6491	9	1000000006
191.873	68.2044	33.0947	9	1000000023
178.44	32.1668	36.3689	9	1000000016
107.205	157.061	35.191	9	1000000017
139.246	181.855	35.9374	9	1000000022
170.905	178.291	33.2368	9	1000000021
184.857	115.13	31.5263	9	1000000019
173.582	117.91	13.5142	9	1000000020
74.7655	41.8332	17.2763	10	1000000000
157.559	45.489	14.5362	10	1000000001
140.944	48.8614	15.8936	10	1000000003
126.339	56.3685	15.8548	10	1000000018
120.612	66.8129	17.5459	10	1000000004
104.881	77.924	17.7845	10	1000000002
103.585	50.0873	18.28	10	1000000005
181.195	35.4336	16.2479	10	1000000007
177.592	79.906	16.1567	10	1000000008
191.873	68.8078	29.4973	10	1000000023
67.197	139.917	9.6462	10	1000000009
49.9704	90.3755	15.1885	10	1000000010
125.875	155.783	20.4961	10	1000000011
106.419	91.6368	26.7218	10	1000000012
94.9416	182.857	23.347	10	1000000013
173.568	191.873	25.8463	10	1000000014
140.323	22.9001	32.5335	10	1000000015
141.415	66.2206	32.4177	10	1000000006
177.985	29.5708	36.3189	10	1000000016
106.46	157.501	36.0415	10	1000000017
139.198	182.057	35.3016	10	1000000022
170.789	178.402	33.7939	10	1000000021
184.439	116.94	30.9309	10	1000000019
173.771	118.062	14.7135	10	1000000020
74.96	42.1674	17.6289	11	1000000000
157.025	45.8928	13.8492	11	1000000001
139.845	48.8013	15.6424	11	1000000003
103.389	50.4932	17.9216	11	1000000005
125.735	57.7177	16.09	11	1000000018
119.993	67.0957	17.3747	11	1000000004
104.126	76.9583	18.4021	11	1000000002
138.099	23.1674	31.1595	11	1000000015
178.49	80.7774	15.305	11	1000000008
180.904	34.6005	16.227	11	1000000007
191.873	69.4525	29.6235	11	1000000023
67.048	139.88	9.26631	11	1000000009
49.3636	90.247	14.3402	11	1000000010
125.481	156.344	21.7629	11	1000000011
104.766	89.2713	26.4306	11	1000000012
96.2626	183.491	22.8234	11	1000000013
172.637	191.873	25.627	11	1000000014
142.216	65.2087	33.0262	11	1000000006
176.858	26.8887	35.5407	11	1000000016
105.333	158.191	36.3447	11	1000000017
140.72	182.948	37.1684	11	1000000022
170.015	178.11	33.3405	11	1000000021
182.777	118.523	31.8815	11	1000000019
173.448	118.622	15.203	11	1000000020
75.0695	41.8987	17.2069	12	1000000000
155.525	46.405	14.2219	12	1000000001
139.6	48.6183	15.3092	12	1000000003
124.895	59.5671	17.546	12	1000000018
104.351	50.2006	18.376	12	1000000005
119.38	68.4931	18.5941	12	1000000004
103.048	75.9629	18.9177	12	1000000002
136.436	21.0274	29.8986	12	1000000015
180.815	35.1895	15.6887	12	1000000007
179.005	80.6971	15.0611	12	1000000008
191.873	69.5427	29.4944	12	1000000023
67.1945	140.667	9.59297	12	1000000009
49.8617	90.5997	14.1399	12	1000000010
126.292	155.966	23.1939	12	1000000011
103.063	87.2358	26.8608	12	1000000012
97.8614	184.101	23.3945	12	1000000013
172.015	191.873	24.8093	12	1000000014
140.674	65.3254	33.6983	12	1000000006
176.81	26.1789	35.2301	12	1000000016
105.307	159.607	37.5655	12	1000000017
139.963	184.517	37.0999	12	1000000022
169.609	177.161	32.6601	12	1000000021
180.859	118.642	30.9873	12	1000000019
172.871	117.584	15.6568	12	1000000020
74.4523	42.0298	16.6587	13	1000000000
155.768	46.8782	14.6721	13	1000000001
139.967	48.7331	15.2534	13	1000000003
123.888	60.4217	16.7233	13	1000000018
104.191	49.8467	18.3132	13	1000000005
118.058	69.4425	19.1247	13	1000000004
102.352	74.6751	19.6586	13	1000000002
134.668	19.8032	28.2906	13	1000000015
179.172	79.8037	14.1748	13	1000000008
180.781	34.4982	16.1442	13	1000000007
191.873	68.1547	26.6226	13	1000000023
66.7195	141.15	9.41892	13	1000000009
49.4038	91.4662	14.2863	13	1000000010
125.675	154.545	24.6555	13	1000000011
101.492	86.3416	27.93	13	1000000012
98.2191	183.985	22.9422	13	1000000013
171.209	191.873	25.5682	13	1000000014
140.734	63.1133	34.2711	13	1000000006
175.982	24.3547	35.7393	13	1000000016
104.758	159.207	37.5711	13	1000000017
139.753	183.859	37.5968	13	1000000022
167.32	176.714	33.5432	13	1000000021
178.502	117.925	31.5418	13	1000000019
172.382	117.326	15.6516	13	1000000020
74.3645	42.1396	16.4183	14	1000000000
154.889	46.1968	14.4585	14	1000000001
139.755	48.5196	15.3193	14	1000000003
123.627	60.7455	15.6532	14	1000000018
104.839	48.3649	18.8321	14	1000000005
116.784	68.7766	18.3056	14	1000000004
101.488	73.4141	19.4474	14	1000000002
132.904	18.6349	26.7455	14	1000000015
178.002	79.7042	13.5906	14	1000000008
180.578	35.0508	17.3913	14	1000000007
191.873	68.1756	23.42	14	1000000023
67.1333	141.425	9.26806	14	1000000009
48.0466	92.4892	13.6464	14	1000000010
125.124	154.34	24.8406	14	1000000011
101.07	84.1027	27.6621	14	1000000012
99.0229	184.027	23.6328	14	1000000013
171.11	191.873	25.5668	14	1000000014
140.43	62.3018	33.1652	14	1000000006
175.932	22.8817	37.1379	14	1000000016
104.649	158.779	36.7479	14	1000000017
139.877	185.18	37.2864	14	1000000022
166.933	176.238	33.3383	14	1000000021
191.873	191.873	36.437	14	1000000024
177.954	119.37	31.7708	14	1000000019
172.047	117.332	15.6823	14	1000000020
74.9981	41.6836	16.6965	15	1000000000
154.63	46.2061	14.4736	15	1000000001
139.806	48.1806	14.9644	15	1000000003
122.717	61.1036	15.5288	15	1000000018
105.459	48.3158	18.9019	15	1000000005
116.746	68.7974	18.5393	15	1000000004
101.375	73.581	19.1576	15	1000000002
132.096	17.9673	25.4958	15	1000000015
99.4467	80.9322	28.2371	15	1000000012
177.474	78.9454	13.4153	15	1000000008
180.974	34.435	18.1298	15	1000000007
191.873	68.6213	21.5096	15	1000000023
66.6987	141.655	9.29623	15	1000000009
47.0172	93.65	13.2705	15	1000000010
124.739	153.781	25.6671	15	1000000011
100.9	184.581	23.766	15	1000000013
170.976	191.262	25.2183	15	1000000014
139.812	60.5213	33.1565	15	1000000006
176.385	22.2624	36.7187	15	1000000016
104.084	158.274	35.347	15	1000000017
140.096	185.457	37.9968	15	1000000022
166.074	174.607	33.5987	15	1000000021
188.935	191.873	34.9007	15	1000000024
176.955	119.122	32.9209	15	1000000019
171.852	115.817	15.412	15	1000000020
68.9845	95.1915	26.9431	15	1000000025
76.9246	42.07	17.3555	16	1000000000
154.45	44.6993	14.2155	16	1000000001
139.484	47.2481	15.0383	16	1000000003
122.553	60.5341	14.193	16	1000000018
117.002	68.2554	17.3787	16	1000000004
105.392	48.2459	19.3149	16	1000000005
99.8392	73.447	18.8808	16	1000000002
131.509	18.2393	25.6916	16	1000000015
97.4071	78.121	28.3693	16	1000000012
177.135	77.764	14.3093	16	1000000008
180.815	34.0584	18.3601	16	1000000007
191.873	68.2364	20.8851	16	1000000023
67.038	142.289	9.00303	16	1000000009
46.0328	93.8741	13.2049	16	1000000010
123.307	152.261	26.9454	16	1000000011
101.039	184.178	23.9134	16	1000000013
169.856	189.513	24.7469	16	1000000014
139.811	59.5784	32.2763	16	1000000006
176.939	21.8131	36.9024	16	1000000016
104.921	157.417	35.7053	16	1000000017
138.916	185.014	37.2389	16	1000000022
186.789	191.873	32.5763	16	1000000024
164.452	173.132	34.9432	16	1000000021
174.816	119.802	33.9035	16	1000000019
171.916	115.453	15.3104	16	1000000020
68.3224	92.9695	25.533	16	1000000025
76.2483	41.1101	17.6566	17	1000000000
122.465	60.381	13.145	17	1000000018
154.192	43.4829	14.5482	17	1000000001
139.162	46.3751	15.0532	17	1000000003
116.557	68.3129	17.0257	17	1000000004
105.468	47.557	19.1865	17	1000000005
99.2101	73.7899	19.0194	17	1000000002
130.832	18.1135	25.0094	17	1000000015
95.6834	74.6418	27.6863	17	1000000012
175.998	78.5161	14.8373	17	1000000008
179.872	33.8343	19.2219	17	1000000007
191.873	68.3218	21.8251	17	1000000023
66.3267	142.155	8.97307	17	1000000009
44.6942	94.3811	13.8469	17	1000000010
122.284	150.565	27.8859	17	1000000011
101.402	184.608	23.3456	17	1000000013
168.611	188.568	24.1352	17	1000000014
184.946	191.873	31.3605	17	1000000024
139.092	58.1414	32.1137	17	1000000006
175.991	22.2124	35.1453	17	1000000016
105.142	155.97	35.1531	17	1000000017
162.066	172.464	35.716	17	1000000021
136.905	184.256	37.0759	17	1000000022
172.887	120.75	33.4689	17	1000000019
170.114	110.854	16.3704	17	1000000020
67.1049	87.4475	23.226	17	1000000025
77.5494	39.9635	18.9307	18	1000000000
123.187	60.9333	13.3061	18	1000000018
153.702	41.3593	15.0812	18	1000000001
139.585	46.0612	15.0265	18	1000000003
117.143	69.271	17.2065	18	1000000004
106.364	47.2704	19.0376	18	1000000005
99.0185	73.7487	18.6594	18	1000000002
130.12	18.4503	23.4052	18	1000000015
93.6199	72.873	26.6855	18	1000000012
137.907	58.6139	31.3883	18	1000000006
175.327	78.3936	16.3246	18	1000000008
179.268	34.6361	19.7783	18	1000000007
191.873	68.4838	21.7785	18	1000000023
65.6987	142.45	8.78115	18	1000000009
43.6954	94.7089	13.5245	18	1000000010
119.939	149.35	28.8336	18	1000000011
100.052	185.336	22.6891	18	1000000013
167.828	186.186	25.0764	18	1000000014
184.332	191.873	27.891	18	1000000024
176.503	20.9396	34.5395	18	1000000016
104.337	155.968	34.1318	18	1000000017
160.816	171.699	35.797	18	1000000021
136.523	184.659	35.0056	18	1000000022
172.779	121.069	33.4302	18	1000000019
171.665	114.713	14.9344	18	1000000020
65.147	85.7966	21.3357	18	1000000025
80.6071	37.899	20.2107	19	1000000000
122.595	60.7193	13.6657	19	1000000018
153.201	40.1078	15.1673	19	1000000001
140.099	46.3207	14.9106	19	1000000003
116.049	69.6968	17.5801	19	1000000004
106.697	46.5892	19.097	19	1000000005
98.4617	74.2107	18.5938	19	1000000002
128.618	16.839	22.6608	19	1000000015
90.9736	71.535	25.6694	19	1000000012
136.387	57.0415	29.7764	19	1000000006
174.619	77.5206	16.4615	19	1000000008
179.152	33.5982	20.8956	19	1000000007
191.873	67.9757	21.7583	19	1000000023
66.0069	142.242	8.68249	19	1000000009
44.2828	95.7661	14.06	19	1000000010
119.037	149.266	29.5123	19	1000000011
101.298	186.17	22.8332	19	1000000013
167.852	183.355	24.4034	19	1000000014
183.641	191.873	27.3381	19	1000000024
177.094	20.7482	35.3977	19	1000000016
103.796	154.814	34.4937	19	1000000017
159.01	171.049	35.0707	19	1000000021
135.363	184.27	34.3701	19	1000000022
172.446	121.233	33.7596	19	1000000019
170.915	112.628	15.6189	19	1000000020
66.5506	85.6206	22.3159	19	1000000025
122.188	61.1731	13.2588	20	1000000018
152.825	39.6641	15.5387	20	1000000001
140.552	46.1878	14.9082	20	1000000003
115.777	68.8044	16.8757	20	1000000004
82.2828	36.0468	19.7189	20	1000000000
107.277	45.6893	19.0942	20	1000000005
99.1198	74.7501	18.7689	20	1000000002
127.451	16.2461	21.4386	20	1000000015
90.2915	71.1786	24.1445	20	1000000012
135.276	57.2165	28.8077	20	1000000006
175.476	77.0958	17.0046	20	1000000008
178.525	33.0462	20.9913	20	1000000007
191.873	65.8202	21.2372	20	1000000023
66.0492	141.6	8.85201	20	1000000009
45.2039	97.6769	14.0939	20	1000000010
119.314	149.074	29.2056	20	1000000011
102.439	186.689	23.2039	20	1000000013
167.696	181.207	23.247	20	1000000014
183.572	191.873	26.9197	20	1000000024
178.346	21.4979	36.5574	20	1000000016
103.254	153.53	34.4456	20	1000000017
135.309	183.719	32.4824	20	1000000022
157.587	170.388	34.3527	20	1000000021
170.344	122.951	34.2746	20	1000000019
170.848	113.769	14.9092	20	1000000020
64.9119	84.8762	21.2371	20	1000000025
121.58	60.1667	12.9552	21	1000000018
152.84	38.2548	15.6319	21	1000000001
141.654	44.8283	14.9618	21	1000000003
115.242	67.3005	16.5399	21	1000000004
82.2917	34.9405	19.1597	21	1000000000
108.109	44.4837	19.4633	21	1000000005
98.9587	74.2167	18.5756	21	1000000002
127.83	15.4291	21.3587	21	1000000015
88.8608	70.7108	22.794	21	1000000012
134.931	56.2486	28.9087	21	1000000006
175.271	76.7538	17.7538	21	1000000008
191.873	64.6398	19.9502	21	1000000023
178.384	32.9672	21.2199	21	1000000007
66.0075	143.108	9.3865	21	1000000009
46.1325	99.2361	13.5645	21	1000000010
118.218	148.376	30.4922	21	1000000011
102.377	187.118	23.1233	21	1000000013
134.759	183.531	31.0576	21	1000000022
168.579	179.825	22.392	21	1000000014
183.864	191.873	27.4771	21	1000000024
178.16	25.1918	37.3612	21	1000000016
101.707	153.74	34.1379	21	1000000017
169.942	121.957	32.7934	21	1000000019
155.655	169.978	35.3348	21	1000000021
171.361	113.352	14.2742	21	1000000020
68.5835	85.3807	19.7347	21	1000000025
115.195	67.0586	16.4027	22	1000000018
152.727	37.7541	15.3144	22	1000000001
141.569	43.5492	14.6291	22	1000000003
115.196	67.063	16.4	22	1000000004
98.0074	74.0312	17.9985	22	1000000002
83.9725	35.0617	18.9146	22	1000000000
108.909	42.8495	18.7615	22	1000000005
127.433	14.5896	20.777	22	1000000015
87.9438	70.617	21.3757	22	1000000012
134.002	56.5931	27.2561	22	1000000006
191.873	63.1055	19.7018	22	1000000023
174.06	76.8742	18.5218	22	1000000008
177.775	33.7415	20.8564	22	1000000007
66.5041	144.372	9.31992	22	1000000009
46.9897	100.218	13.0948	22	1000000010
116.163	148.096	31.7048	22	1000000011
102.442	187.206	24.3492	22	1000000013
134.461	182.153	29.3639	22	1000000022
168.887	178.986	22.5177	22	1000000014
183.166	191.873	27.5913	22	1000000024
179.127	25.5651	37.3208	22	1000000016
100.9	154.13	34.4496	22	1000000017
167.607	125.837	33.4967	22	1000000019
153.928	168.372	36.1264	22	1000000021
171.216	113.375	13.3095	22	1000000020
70.7446	87.6154	17.8156	22	1000000025
121.381	59.7489	12.8272	23	1000000018
153.068	37.6206	15.6085	23	1000000001
141.369	43.6909	14.7886	23	1000000003
114.608	67.2539	15.929	23	1000000004
97.3093	73.2551	17.5574	23	1000000002
84.6257	34.5499	18.9626	23	1000000000
109.295	41.8063	19.1689	23	1000000005
127.952	14.0209	21.0503	23	1000000015
87.3354	69.4289	21.1807	23	1000000012
133.19	56.1985	26.4909	23	1000000006
176.274	76.1849	17.951	23	1000000008
191.873	62.8496	19.6944	23	1000000023
175.781	34.0796	21.6116	23	1000000007
66.7322	145.187	9.13522	23	1000000009
47.7302	101.376	13.1268	23	1000000010
115.477	148.006	31.4074	23	1000000011
102.974	187.309	25.0568	23	1000000013
135.657	179.801	27.6775	23	1000000022
168.89	178.664	22.1379	23	1000000014
183.296	191.873	26.7739	23	1000000024
178.632	25.2915	37.3195	23	1000000016
100.163	153.52	33.6857	23	1000000017
166.37	127.197	33.284	23	1000000019
151.647	168.642	35.5558	23	1000000021
171.485	111.427	13.5725	23	1000000020
70.3248	85.9957	17.8499	23	1000000025
121.734	58.783	12.5289	24	1000000018
140.765	43.2578	14.8515	24	1000000003
114.773	66.8555	15.1589	24	1000000004
97.023	72.4468	17.7462	24	1000000002
84.9537	34.3431	18.7639	24	1000000000
109.82	41.7169	19.0807	24	1000000005
129.145	13.0125	20.929	24	1000000015
87.24	69.2236	20.6624	24	1000000012
132.87	56.4247	25.3088	24	1000000006
175.274	76.1831	17.7896	24	1000000008
191.873	63.588	20.155	24	1000000023
173.669	35.2138	22.6049	24	1000000007
66.5383	145.975	9.38314	24	1000000009
47.9932	102.187	13.0362	24	1000000010
114.524	148.455	30.8596	24	1000000011
101.096	187.496	24.844	24	1000000013
136.575	178.024	26.4317	24	1000000022
169.072	178.045	21.6555	24	1000000014
183.244	190.883	26.9006	24	1000000024
179.243	25.3071	36.5248	24	1000000016
99.7867	154.128	33.0097	24	1000000017
166.417	126.923	32.7061	24	1000000019
150.053	169.066	33.5161	24	1000000021
155.124	34.6836	20.72	24	1000000001
170.436	110.766	13.417	24	1000000020
62.7308	84.621	21.3666	24	1000000025
121.542	59.001	11.5136	25	1000000018
153.27	36.8819	15.4097	25	1000000001
139.797	42.745	14.1958	25	1000000003
112.955	67.4143	15.0584	25	1000000004
83.9952	34.6878	18.7349	25	1000000000
109.977	41.8536	19.2714	25	1000000005
96.3154	72.5778	18.2555	25	1000000002
128.718	12.2087	21.3186	25	1000000015
86.318	69.5599	21.0075	25	1000000012
131.89	56.64	24.7728	25	1000000006
191.873	62.8349	19.3795	25	1000000023
175.99	76.6069	18.1261	25	1000000008
172.77	34.8566	22.3723	25	1000000007
66.7349	147.195	9.69009	25	1000000009
47.7849	103.021	13.4884	25	1000000010
111.957	147.758	30.4183	25	1000000011
137.724	177.648	25.5315	25	1000000022
98.577	186.536	24.5368	25	1000000013
168.266	176.493	21.4135	25	1000000014
182.872	190.829	27.2516	25	1000000024
179.712	25.8097	36.7706	25	1000000016
97.8123	153.117	34.0749	25	1000000017
165.727	125.829	32.3824	25	1000000019
147.278	168.939	32.5838	25	1000000021
170.085	110.154	14.4377	25	1000000020
59.6263	83.5008	22.577	25	1000000025
121.804	59.0661	12.2866	26	1000000018
152.885	36.3834	14.8085	26	1000000001
139.106	41.8866	14.1098	26	1000000003
113.265	67.8316	15.5714	26	1000000004
83.3188	34.6242	19.7826	26	1000000000
110.181	42.0728	18.9225	26	1000000005
95.9137	71.6196	18.8037	26	1000000002
86.337	67.7614	21.3185	26	1000000012
128.659	12.5908	22.1777	26	1000000015
131.498	56.2818	24.0864	26	1000000006
176.443	76.9732	17.4203	26	1000000008
191.873	61.7613	20.3247	26	1000000023
172.059	36.1367	25.0684	26	1000000007
66.1039	147.329	9.89552	26	1000000009
48.2363	103.003	13.8741	26	1000000010
111.358	147.726	29.0832	26	1000000011
164.698	126.207	31.0286	26	1000000019
139.439	178.553	25.0031	26	1000000022
99.7066	187.073	24.7573	26	1000000013
144.12	170.729	31.729	26	1000000021
168.205	176.755	20.5977	26	1000000014
182.63	190.851	27.1194	26	1000000024
178.823	27.956	37.4044	26	1000000016
96.2588	153.561	33.846	26	1000000017
169.166	110.078	14.3684	26	1000000020
64.9402	81.8029	19.8485	26	1000000025
121.5	59.8389	11.1874	27	1000000018
152.297	36.034	14.7688	27	1000000001
138.811	41.5993	14.0928	27	1000000003
112.285	66.6886	14.2328	27	1000000004
110.726	43.2014	17.5611	27	1000000005
83.674	34.575	19.6324	27	1000000000
95.3616	70.1588	18.3248	27	1000000002
85.4822	67.0206	21.8378	27	1000000012
127.298	12.3543	22.5211	27	1000000015
131.162	56.4002	24.1398	27	1000000006
191.873	61.7699	19.7822	27	1000000023
176.708	76.3782	18.4783	27	1000000008
171.4	36.7596	25.8987	27	1000000007
65.9246	148.494	9.62862	27	1000000009
49.4524	103.387	13.4763	27	1000000010
111.082	148.205	27.3271	27	1000000011
164.815	125.982	31.3966	27	1000000019
139.982	172.398	28.8832	27	1000000022
100.918	186.243	23.9103	27	1000000013
139.984	172.4	28.9056	27	1000000021
167.702	176.178	20.3817	27	1000000014
182.783	188.475	26.8106	27	1000000024
177.825	27.6754	39.1706	27	1000000016
94.56	152.878	33.2413	27	1000000017
169.186	110.302	14.8639	27	1000000020
64.1957	81.0591	20.4308	27	1000000025
81.3021	34.7687	19.6802	28	1000000000
121.867	60.5013	10.7907	28	1000000018
113.101	66.1646	13.9567	28	1000000004
151.894	35.7261	15.1225	28	1000000001
138.949	41.5874	14.1763	28	1000000003
110.523	43.0195	17.3566	28	1000000005
94.788	68.9466	17.4514	28	1000000002
84.7848	66.1685	20.7218	28	1000000012
127.335	12.799	22.9422	28	1000000015
131.18	56.2476	23.7492	28	1000000006
176.655	76.714	17.3441	28	1000000008
191.873	61.4012	19.3352	28	1000000023
171.107	38.0717	27.1095	28	1000000007
65.154	147.635	9.10473	28	1000000009
50.5695	103.73	13.53	28	1000000010
113.066	147.165	26.3384	28	1000000011
163.41	125.734	31.2523	28	1000000019
136.614	171.195	26.574	28	1000000022
101.778	184.055	22.925	28	1000000013
136.613	171.195	26.5926	28	1000000021
166.405	176.357	19.1146	28	1000000014
181.803	187.465	26.5418	28	1000000024
177.865	27.5985	37.2399	28	1000000016
93.9051	151.775	33.8062	28	1000000017
169.067	108.982	14.2858	28	1000000020
58.2319	82.3041	23.5484	28	1000000025
78.8247	34.8733	20.4814	29	1000000000
121.406	61.0083	9.78278	29	1000000018
112.011	66.6184	13.2774	29	1000000004
151.805	35.4551	15.7346	29	1000000001
139.46	41.1048	14.3392	29	1000000003
110.405	43.3301	17.027	29	1000000005
94.3114	68.3245	17.2166	29	1000000002
84.1192	66.0346	20.5434	29	1000000012
130.814	56.1642	23.3891	29	1000000006
126.465	12.9931	24.1675	29	1000000015
191.873	61.0008	19.8365	29	1000000023
176.088	75.5648	18.5434	29	1000000008
172.057	39.0499	27.4527	29	1000000007
66.5715	149.342	9.25902	29	1000000009
53.4311	104.873	14.4392	29	1000000010
115.079	149.385	26.7841	29	1000000011
163.715	125.486	30.5384	29	1000000019
139.663	176.615	19.8491	29	1000000022
103.359	183.742	23.1612	29	1000000013
134.585	171.18	26.4853	29	1000000021
165.54	178.232	18.1368	29	1000000014
181.675	186.902	25.6839	29	1000000024
179.175	26.637	35.5911	29	1000000016
93.2496	151.917	32.6711	29	1000000017
170.059	110.109	14.3262	29	1000000020
58.4208	81.6475	23.137	29	1000000025
77.0058	35.8201	19.8994	30	1000000000
120.496	61.4317	9.99923	30	1000000018
150.676	34.2624	15.97	30	1000000001
139.997	40.4448	14.357	30	1000000003
111.316	67.9567	14.1797	30	1000000004
111.024	44.4093	16.4057	30	1000000005
93.4679	68.5313	17.0533	30	1000000002
83.0787	66.4801	21.4555	30	1000000012
130.087	55.9066	23.1968	30	1000000006
125.835	12.6128	24.3722	30	1000000015
176.568	76.1528	17.5257	30	1000000008
191.873	60.9675	18.6146	30	1000000023
172.55	39.435	27.1433	30	1000000007
67.5566	150.165	9.46014	30	1000000009
56.1121	106.155	16.2824	30	1000000010
116.581	151.453	25.6113	30	1000000011
163.557	124.406	29.6435	30	1000000019
140.957	176.682	19.4277	30	1000000022
102.699	185.31	24.0294	30	1000000013
133.471	172.379	26.6599	30	1000000021
165.133	179.597	18.6125	30	1000000014
181.125	186.472	25.159	30	1000000024
179.593	26.5664	33.7758	30	1000000016
90.4849	152.944	33.9391	30	1000000017
169.534	109.281	14.8611	30	1000000020
56.3693	81.2162	23.0079	30	1000000025
76.7245	36.4784	19.569	31	1000000000
120.642	61.7718	10.7677	31	1000000018
149.748	33.2133	15.7658	31	1000000001
139.964	39.7012	14.5082	31	1000000003
110.959	69.0768	15.3988	31	1000000004
112.111	45.0769	16.1426	31	1000000005
93.264	68.9424	17.2943	31	1000000002
83.1366	66.583	21.1407	31	1000000012
129.486	56.0749	23.2153	31	1000000006
124.871	11.9377	24.566	31	1000000015
174.826	75.4096	17.3661	31	1000000008
191.873	60.8437	18.1564	31	1000000023
170.821	40.2847	27.2196	31	1000000007
67.2736	150.048	9.0888	31	1000000009
56.1308	106.284	15.8268	31	1000000010
118.412	152.026	23.7927	31	1000000011
165.038	122.045	29.6627	31	1000000019
141.585	175.793	19.3273	31	1000000022
103.887	184.91	26.2368	31	1000000013
133.307	171.12	28.4572	31	1000000021
165.119	180.369	18.7002	31	1000000014
180.812	185.022	23.4841	31	1000000024
178.516	26.3607	33.2418	31	1000000016
89.1085	153.14	33.0725	31	1000000017
169.817	110.037	13.6531	31	1000000020
55.4643	83.4107	22.7963	31	1000000025
75.7706	36.6685	19.3104	32	1000000000
120.885	61.2684	10.4734	32	1000000018
141.25	38.7998	15.0528	32	1000000003
111.286	69.6643	15.4022	32	1000000004
149.581	31.9839	16.4028	32	1000000001
112.962	45.6563	16.2177	32	1000000005
92.8525	67.8508	16.6934	32	1000000002
83.0972	66.099	20.9858	32	1000000012
130.151	55.0592	22.3705	32	1000000006
123.51	12.5854	25.5409	32	1000000015
191.873	60.7788	16.9625	32	1000000023
173.636	73.8614	16.8334	32	1000000008
169.827	41.427	28.2942	32	1000000007
67.9104	150.495	8.68783	32	1000000009
54.9026	105.653	15.4374	32	1000000010
120.193	152.34	23.4896	32	1000000011
86.6471	152.107	30.5268	32	1000000017
164.42	121.154	29.8189	32	1000000019
143.341	175.339	19.0784	32	1000000022
131.707	170.427	26.9517	32	1000000021
104.061	185.476	26.4809	32	1000000013
165.148	180.593	18.8054	32	1000000014
180.266	184.756	21.7904	32	1000000024
177.713	25.5663	33.2814	32	1000000016
170.167	109.559	13.1493	32	1000000020
66.0643	83.7794	22.7609	32	1000000025
75.3204	36.7736	19.4997	33	1000000000
120.751	62.0217	11.1741	33	1000000018
143.214	37.7011	15.6793	33	1000000003
149.88	31.2154	16.7018	33	1000000001
114.094	46.2803	16.9304	33	1000000005
92.7751	67.3991	16.5678	33	1000000002
110.425	71.6921	16.7503	33	1000000004
129.441	54.1096	21.7443	33	1000000006
83.7826	65.2722	21.4376	33	1000000012
123.177	12.608	25.1725	33	1000000015
191.873	59.905	17.1374	33	1000000023
175.458	74.6641	16.5874	33	1000000008
167.659	40.5619	27.3812	33	1000000007
68.3948	151.707	8.22789	33	1000000009
55.8522	105.74	15.2399	33	1000000010
121.244	153.422	22.9849	33	1000000011
85.0826	150.967	29.2927	33	1000000017
165.561	119.276	29.8126	33	1000000019
148.678	172.331	19.278	33	1000000022
104.785	185.239	25.7208	33	1000000013
131.215	169.098	26.2553	33	1000000021
165.709	181.345	18.1572	33	1000000014
180.491	183.504	20.5574	33	1000000024
177.938	25.2709	33.0372	33	1000000016
170.115	108.309	12.9149	33	1000000020
53.3107	82.0565	23.5733	33	1000000025
75.3281	36.9012	19.9366	34	1000000000
120.136	63.4795	10.8174	34	1000000018
143.64	39.1007	15.5267	34	1000000003
149.157	31.0454	16.0015	34	1000000001
115.09	46.5552	16.6665	34	1000000005
93.1318	65.9386	16.6303	34	1000000002
110.33	72.0815	17.4734	34	1000000004
83.8408	64.2599	21.3496	34	1000000012
123.208	12.5156	23.796	34	1000000015
129.077	53.4958	22.7894	34	1000000006
191.873	60.2803	16.8043	34	1000000023
175.497	74.2622	16.9655	34	1000000008
163.929	38.605	27.8538	34	1000000007
177.079	25.7178	31.5808	34	1000000016
68.6258	151.54	8.29542	34	1000000009
56.3336	105.067	15.5284	34	1000000010
122.435	153.138	22.8538	34	1000000011
82.6006	149.719	29.0554	34	1000000017
166.384	118.127	30.1388	34	1000000019
150.101	170.332	19.1436	34	1000000022
130.801	169.528	26.8944	34	1000000021
103.897	183.887	26.1854	34	1000000013
165.141	181.524	17.964	34	1000000014
179.666	183.049	19.8806	34	1000000024
170.479	108.842	13.5936	34	1000000020
52.6737	82.045	23.5026	34	1000000025
75.7216	36.2955	19.6197	35	1000000000
119.383	64.4635	10.6908	35	1000000018
147.452	30.4537	15.3858	35	1000000001
143.912	39.7221	15.4489	35	1000000003
115.224	46.3897	16.2618	35	1000000005
92.4353	64.8754	16.257	35	1000000002
110.314	72.381	17.4153	35	1000000004
83.3973	63.6908	20.3113	35	1000000012
122.335	12.5247	23.6985	35	1000000015
129.197	53.0874	22.8107	35	1000000006
162.665	37.8964	27.0196	35	1000000007
191.873	60.3256	17.8077	35	1000000023
177.051	75.592	17.2656	35	1000000008
176.53	26.035	30.8354	35	1000000016
68.5594	152.316	8.20138	35	1000000009
54.9685	104.883	15.1388	35	1000000010
80.2831	150.929	29.4955	35	1000000017
123.208	155.735	21.9997	35	1000000011
165.774	117.667	29.9156	35	1000000019
151.112	170.683	19.3774	35	1000000022
104.449	183.244	24.9966	35	1000000013
129.694	170.829	28.54	35	1000000021
165.314	181.779	17.7089	35	1000000014
178.769	182.556	18.628	35	1000000024
170.103	108.607	13.6456	35	1000000020
55.4472	81.0772	21.7797	35	1000000025
76.491	35.1772	19.0295	36	1000000000
120.17	65.198	10.8592	36	1000000018
145.394	29.6425	15.2805	36	1000000001
144.226	40.459	14.8497	36	1000000003
116.092	46.9208	15.5904	36	1000000005
92.6389	64.3969	15.2565	36	1000000002
110.427	72.022	17.1245	36	1000000004
84.1262	63.2519	19.6006	36	1000000012
122.414	13.0396	21.7852	36	1000000015
129.081	52.4076	23.1699	36	1000000006
161.934	37.3732	26.5912	36	1000000007
178.08	75.6102	17.0559	36	1000000008
191.873	60.7693	18.0881	36	1000000023
175.731	25.2367	30.542	36	1000000016
68.7867	153.184	7.78143	36	1000000009
53.7287	104.163	14.4014	36	1000000010
79.4547	149.355	28.7372	36	1000000017
124.013	156.831	22.447	36	1000000011
164.932	116.776	29.289	36	1000000019
151.178	170.585	19.3813	36	1000000022
103.362	181.973	24.8432	36	1000000013
129.32	170.888	29.0268	36	1000000021
163.86	182.439	17.023	36	1000000014
177.669	182.372	17.9745	36	1000000024
170.088	108.034	15.2717	36	1000000020
53.8809	80.4069	22.69	36	1000000025
76.1954	34.1337	18.6302	37	1000000000
121.325	66.3179	12.058	37	1000000018
144.185	29.3661	15.4375	37	1000000001
145.576	40.2622	15.1618	37	1000000003
116.75	47.6976	15.6106	37	1000000005
93.3921	64.3785	14.6437	37	1000000002
111.032	72.8263	17.3495	37	1000000004
84.9839	62.6673	18.5803	37	1000000012
121.299	14.2141	21.6349	37	1000000015
129.32	52.0258	22.7663	37	1000000006
161.667	38.5016	25.368	37	1000000007
177.947	75.9008	16.2779	37	1000000008
191.873	61.1924	18.1749	37	1000000023
175.025	24.4713	28.7373	37	1000000016
68.5147	152.668	6.9979	37	1000000009
53.5103	103.765	13.7129	37	1000000010
79.2087	150.125	27.4197	37	1000000017
125.05	158.412	22.4827	37	1000000011
163.923	115.059	28.2988	37	1000000019
150.824	170.416	20.9047	37	1000000022
104.179	182.772	26.4421	37	1000000013
128.189	172.199	30.8489	37	1000000021
176.087	182.238	17.4491	37	1000000024
163.133	182.426	18.0677	37	1000000014
169.565	108.106	14.9228	37	1000000020
53.4475	81.9253	19.7129	37	1000000025
77.9873	35.0343	18.1658	38	1000000000
121.2	67.8889	11.9296	38	1000000018
142.069	28.5376	15.0795	38	1000000001
146.681	39.9596	15.3366	38	1000000003
117.251	48.1599	15.7649	38	1000000005
94.0049	64.8325	14.8028	38	1000000002
111.177	73.5019	17.5479	38	1000000004
85.8413	61.2652	18.8255	38	1000000012
120.93	15.0354	21.5764	38	1000000015
161.094	38.3753	23.7739	38	1000000007
129.285	51.8117	23.0312	38	1000000006
191.873	61.772	17.8869	38	1000000023
178.22	76.6834	16.4286	38	1000000008
172.808	23.8622	25.7096	38	1000000016
68.0725	153.596	7.45542	38	1000000009
53.9604	103.301	13.2015	38	1000000010
77.8494	153.238	27.1525	38	1000000017
125.152	159.141	22.2721	38	1000000011
162.932	115.042	28.3089	38	1000000019
161.652	183.095	18.5804	38	1000000014
150.959	170.255	21.6218	38	1000000022
103.731	181.166	27.7872	38	1000000013
125.956	171.315	31.7	38	1000000021
174.692	182.214	17.4183	38	1000000024
169.823	108.49	13.4792	38	1000000020
41.9406	79.1979	21.4173	38	1000000025
78.9727	34.7324	17.3293	39	1000000000
120.381	68.0619	11.6692	39	1000000018
140.295	27.4915	14.2136	39	1000000001
146.834	39.722	14.0339	39	1000000003
116.928	48.4405	15.5355	39	1000000005
94.6729	65.1739	14.936	39	1000000002
86.9699	61.0627	19.489	39	1000000012
110.583	74.8125	18.9508	39	1000000004
120.267	14.9933	20.3491	39	1000000015
161.523	38.6689	23.2885	39	1000000007
128.311	52.651	23.3278	39	1000000006
191.873	61.5075	17.5683	39	1000000023
177.565	76.5987	16.3017	39	1000000008
172.532	22.1946	24.8433	39	1000000016
68.5621	154.413	7.66143	39	1000000009
54.6734	101.858	12.6454	39	1000000010
77.0982	153.579	27.0784	39	1000000017
125.691	159.085	21.2394	39	1000000011
161.095	113.552	27.9036	39	1000000019
162.175	183.183	19.1959	39	1000000014
151.266	169.98	22.2612	39	1000000022
102.957	180.136	26.5335	39	1000000013
174.699	182.223	17.021	39	1000000024
126.318	170.321	32.5537	39	1000000021
169.924	107.451	14.5743	39	1000000020
44.2337	75.8568	16.859	39	1000000025
80.2445	34.0991	17.8465	40	1000000000
120.549	68.2176	11.1543	40	1000000018
140.068	28.1708	13.6599	40	1000000001
147.569	40.2676	14.5295	40	1000000003
116.478	48.5662	15.4335	40	1000000005
95.2433	64.8054	14.6124	40	1000000002
119.822	14.5733	19.9086	40	1000000015
87.3759	60.3365	19.481	40	1000000012
110.496	74.3141	18.8111	40	1000000004
160.456	38.4988	23.2681	40	1000000007
127.936	52.3534	23.8172	40	1000000006
176.759	76.7563	15.8595	40	1000000008
191.873	62.3863	17.2144	40	1000000023
170.497	22.0383	23.0165	40	1000000016
68.548	155.365	7.64239	40	1000000009
54.7172	100.976	12.5905	40	1000000010
77.0103	153.639	25.311	40	1000000017
125.079	159.887	19.7851	40	1000000011
159.898	113.63	27.3561	40	1000000019
161.257	184.214	19.5447	40	1000000014
151.432	170.913	21.5037	40	1000000022
102.79	181.179	27.1256	40	1000000013
173.686	181.983	16.4748	40	1000000024
126.244	171.019	32.417	40	1000000021
170.474	108.609	13.999	40	1000000020
40.1152	76.9142	21.0545	40	1000000025
78.7681	34.1421	16.7748	41	1000000000
119.536	68.8549	10.3337	41	1000000018
95.3536	64.8776	13.3972	41	1000000002
137.261	27.1952	14.5695	41	1000000001
147.692	40.5857	14.7707	41	1000000003
116.839	48.1062	15.1597	41	1000000005
86.9822	61.4102	18.7544	41	1000000012
109.855	75.783	18.341	41	1000000004
119.092	14.5059	20.7691	41	1000000015
158.313	38.3124	22.3479	41	1000000007
127.479	51.6389	24.0663	41	1000000006
176.709	77.501	15.8107	41	1000000008
191.873	63.7183	17.351	41	1000000023
169.286	21.6761	23.1965	41	1000000016
69.3344	156.004	7.2213	41	1000000009
55.7432	101.325	12.3226	41	1000000010
79.5587	151.184	26.3004	41	1000000017
124.759	159.565	20.0487	41	1000000011
159.172	113.665	26.5895	41	1000000019
152.815	171.301	21.3689	41	1000000022
161.497	185.766	20.3346	41	1000000014
104.416	181.575	26.7227	41	1000000013
125.594	171.928	31.5157	41	1000000021
173.35	181.645	17.032	41	1000000024
170.375	108.606	14.7138	41	1000000020
38.4729	75.9264	23.0153	41	1000000025
78.0432	34.4721	16.6635	42	1000000000
119.682	68.0823	10.6571	42	1000000018
95.7269	64.8446	12.8834	42	1000000002
137.197	28.5424	14.9059	42	1000000001
147.962	41.0562	15.1009	42	1000000003
117.145	47.428	15.9747	42	1000000005
110.215	74.3714	17.3642	42	1000000004
87.0518	62.0222	18.3545	42	1000000012
118.807	13.9694	20.9786	42	1000000015
157.847	36.8323	22.3587	42	1000000007
127.459	50.5168	24.745	42	1000000006
191.873	64.1242	16.9952	42	1000000023
176.682	77.4138	16.143	42	1000000008
168.096	20.6738	23.4617	42	1000000016
69.1155	155.678	6.79863	42	1000000009
57.3462	102.503	11.9025	42	1000000010
126.384	160.509	18.9872	42	1000000011
81.8887	150.057	25.0796	42	1000000017
157.236	112.941	26.3711	42	1000000019
161.734	186.911	20.3952	42	1000000014
151.708	171.368	22.5031	42	1000000022
104.397	181.772	26.8016	42	1000000013
172.826	180.853	17.7876	42	1000000024
126.228	172.466	32.5408	42	1000000021
170.357	108.028	14.5586	42	1000000020
47.1737	76.0838	20.6238	42	1000000025
77.0888	34.92	16.4254	43	1000000000
119.197	69.1329	10.5809	43	1000000018
94.859	64.2276	12.581	43	1000000002
135.293	28.2314	15.0205	43	1000000001
147.754	42.1077	14.8407	43	1000000003
116.905	48.3176	15.8437	43	1000000005
86.0173	62.5757	18.5896	43	1000000012
109.599	75.0668	18.6171	43	1000000004
117.363	12.5502	21.5353	43	1000000015
156.177	36.7525	21.3411	43	1000000007
127.383	50.0667	24.5212	43	1000000006
176.54	77.9936	14.9733	43	1000000008
191.873	65.1464	16.6142	43	1000000023
167.488	19.6676	21.7169	43	1000000016
69.8843	155.517	6.21539	43	1000000009
58.5199	102.755	11.8289	43	1000000010
126.486	160.422	18.8087	43	1000000011
157.671	111.584	25.8305	43	1000000019
83.3562	150.627	24.0591	43	1000000017
161.253	187.174	20.9566	43	1000000014
151.096	171.483	23.804	43	1000000022
104.267	182.437	27.6049	43	1000000013
171.858	180.28	17.5842	43	1000000024
124.187	171.909	33.1811	43	1000000021
169.281	106.725	14.2153	43	1000000020
36.2975	75.0865	21.3152	43	1000000025
78.012	35.0141	16.127	44	1000000000
94.3384	63.3386	11.7332	44	1000000002
119.464	69.5437	10.0831	44	1000000018
147.751	41.8373	14.7119	44	1000000003
116.809	48.0178	14.9708	44	1000000005
133.365	27.1101	16.6935	44	1000000001
85.8428	62.4588	17.6467	44	1000000012
109.752	74.498	17.9427	44	1000000004
116.148	11.9073	21.2472	44	1000000015
155.049	36.4087	21.5729	44	1000000007
127.516	49.6173	24.7662	44	1000000006
176.691	78.4665	14.0649	44	1000000008
191.873	64.8016	16.1082	44	1000000023
166.924	17.9916	22.4417	44	1000000016
69.9534	155.866	6.51331	44	1000000009
59.8582	102.994	12.6683	44	1000000010
126.84	161.781	18.7041	44	1000000011
157.471	110.743	25.5361	44	1000000019
83.8929	151.975	24.4996	44	1000000017
161.653	187.502	21.1006	44	1000000014
151.428	171.432	24.3526	44	1000000022
102.751	182.493	27.1248	44	1000000013
170.757	179.276	18.5023	44	1000000024
122.577	172.548	32.5549	44	1000000021
169.016	106.983	14.0436	44	1000000020
36.4004	74.642	20.979	44	1000000025
77.8129	34.5551	16.1005	45	1000000000
119.796	69.3044	9.53788	45	1000000018
94.1111	62.3128	11.4877	45	1000000002
148.076	42.4307	14.9041	45	1000000003
117.356	47.1115	14.839	45	1000000005
132.051	26.4644	17.0281	45	1000000001
86.1331	62.1551	17.9247	45	1000000012
109.991	73.7628	17.6749	45	1000000004
116.561	11.5884	23.2701	45	1000000015
154.854	36.1141	23.608	45	1000000007
127.657	48.7383	24.9294	45	1000000006
191.873	64.5325	15.6909	45	1000000023
176.588	78.4113	14.0266	45	1000000008
165.998	16.2678	22.6111	45	1000000016
70.7828	156.826	6.5607	45	1000000009
61.0684	103.491	12.8035	45	1000000010
126.801	162.864	18.2341	45	1000000011
83.8182	152.456	23.6995	45	1000000017
157.286	111.724	26.9629	45	1000000019
162.365	189.05	22.0707	45	1000000014
152.004	172.654	24.8601	45	1000000022
102.968	181.656	25.7401	45	1000000013
121.743	172.614	31.7175	45	1000000021
170.433	178.504	18.4693	45	1000000024
169.115	106.98	15.0689	45	1000000020
35.2624	73.4264	20.2348	45	1000000025
79.6491	32.2958	15.4772	46	1000000000
120.295	69.101	10.3009	46	1000000018
95.9364	61.7916	12.4615	46	1000000002
148.529	42.2998	14.8551	46	1000000003
118.851	47.1442	14.988	46	1000000005
132.843	25.7763	17.8855	46	1000000001
87.0941	61.3661	17.6017	46	1000000012
109.788	73.9681	17.6621	46	1000000004
116.378	10.9966	23.7168	46	1000000015
156.031	35.7738	24.7949	46	1000000007
128.998	48.2773	24.5117	46	1000000006
176.347	77.919	13.7425	46	1000000008
191.873	65.1333	15.266	46	1000000023
166.435	15.7061	23.2729	46	1000000016
71.6007	157.403	6.16973	46	1000000009
61.7683	104.949	13.7631	46	1000000010
84.1234	152.361	24.191	46	1000000017
160.013	112.077	26.8278	46	1000000019
125.791	165.356	18.5352	46	1000000011
161.942	189.761	22.6724	46	1000000014
151.71	173.176	25.2495	46	1000000022
104.044	182.54	25.2943	46	1000000013
120.526	172.081	30.7592	46	1000000021
169.654	177.895	19.1585	46	1000000024
170.246	107	14.7981	46	1000000020
33.4386	73.5957	19.0808	46	1000000025
78.2016	33.0156	15.5352	47	1000000000
120.686	69.2993	9.9821	47	1000000018
96.8436	60.7218	12.7232	47	1000000002
147.336	42.9635	14.4582	47	1000000003
119.586	47.2557	15.3149	47	1000000005
131.688	25.6932	17.801	47	1000000001
86.8958	60.894	17.831	47	1000000012
109.517	73.6543	16.9653	47	1000000004
116.18	9.77233	24.0863	47	1000000015
154.751	36.4865	25.4313	47	1000000007
129.643	47.5915	24.7121	47	1000000006
177.005	78.3187	13.4086	47	1000000008
191.873	65.5882	15.0082	47	1000000023
165.765	15.9485	22.0499	47	1000000016
72.1018	158.377	5.87851	47	1000000009
62.8102	105.528	13.4224	47	1000000010
83.1001	151.103	23.4793	47	1000000017
159.514	109.869	25.225	47	1000000019
124.73	166.995	18.8371	47	1000000011
161.577	190.819	22.5541	47	1000000014
149.881	173.194	25.8352	47	1000000022
103.737	181.086	25.507	47	1000000013
118.229	170.343	29.8129	47	1000000021
168.974	177.171	18.7957	47	1000000024
94.612	84.291	45	47	1000000026
170.041	108.422	14.3853	47	1000000020
32.7481	72.8758	19.7653	47	1000000025
76.9281	34.0461	15.4809	48	1000000000
121.032	69.5599	10.4105	48	1000000018
98.1299	60.3906	13.8534	48	1000000002
146.857	43.6424	14.5242	48	1000000003
122.9	48.3885	15.2298	48	1000000005
129.281	24.9495	17.4571	48	1000000001
86.7905	60.5763	17.9074	48	1000000012
108.928	73.9935	18.82	48	1000000004
114.55	9.66575	23.6859	48	1000000015
130.385	47.1663	24.4387	48	1000000006
154.232	36.7912	26.1487	48	1000000007
176.839	78.6083	13.332	48	1000000008
191.873	65.8346	14.8649	48	1000000023
164.919	15.5531	21.5172	48	1000000016
72.8643	158.187	5.70756	48	1000000009
62.7861	104.806	13.0745	48	1000000010
83.3744	150.261	23.3213	48	1000000017
160.531	107.853	24.8835	48	1000000019
124.395	167.685	19.2814	48	1000000011
160.719	191.873	23.1599	48	1000000014
105.192	173.238	24.4051	48	1000000013
151.877	173.791	25.7	48	1000000022
116.027	167.509	30.7644	48	1000000021
168.743	176.056	19.3687	48	1000000024
93.2944	82.3194	45	48	1000000026
171.205	106.793	14.1622	48	1000000020
31.99	72.8565	19.8725	48	1000000025
76.9849	33.5689	15.5736	49	1000000000
121.43	70.0593	10.4182	49	1000000018
147.013	44.5257	14.4224	49	1000000003
123.906	47.7725	14.9079	49	1000000005
98.587	60.8366	14.718	49	1000000002
127.862	24.6899	17.6928	49	1000000001
86.6788	60.5952	18.8493	49	1000000012
109.052	72.7178	19.7432	49	1000000004
114.187	9.42363	24.8615	49	1000000015
153.013	37.0387	25.7854	49	1000000007
130.687	46.7856	24.8277	49	1000000006
176.372	78.8275	13.421	49	1000000008
191.873	66.1398	15.4158	49	1000000023
164.684	14.503	20.8179	49	1000000016
72.7322	158.259	5.74807	49	1000000009
62.0635	104.189	12.6185	49	1000000010
82.8572	150.92	23.7828	49	1000000017
160.593	108.441	24.9297	49	1000000019
125.377	170.127	20.3871	49	1000000011
104.944	172.182	24.2293	49	1000000013
159.696	191.873	25.0323	49	1000000014
150.704	174.85	26.9106	49	1000000022
114.928	166.031	31.5057	49	1000000021
167.815	176.21	20.0426	49	1000000024
92.7992	80.8854	45	49	1000000026
171.21	107.845	15.2912	49	1000000020
30.5028	71.2994	20.7468	49	1000000025
79.2395	33.2067	15.5496	50	1000000000
121.451	70.9914	10.7937	50	1000000018
146.408	46.2394	13.4887	50	1000000003
125.138	47.6884	14.7462	50	1000000005
99.2179	60.2623	14.2745	50	1000000002
127.633	24.3786	17.1111	50	1000000001
86.6421	61.2665	18.6103	50	1000000012
107.654	73.0259	20.3108	50	1000000004
114.83	9.42851	25.3336	50	1000000015
131.242	46.393	24.4089	50	1000000006
152.009	37.8412	27.3966	50	1000000007
176.094	79.7639	13.0411	50	1000000008
191.873	66.5888	14.2931	50	1000000023
163.404	14.9186	19.6936	50	1000000016
72.8208	158.34	5.90336	50	1000000009
62.2095	104.592	13.0917	50	1000000010
80.2811	149.388	25.7948	50	1000000017
160.148	106.658	23.8198	50	1000000019
125.144	171.482	21.651	50	1000000011
104.301	170.719	23.4935	50	1000000013
150.272	174.418	26.5513	50	1000000022
168.025	176.319	19.3041	50	1000000024
114.068	163.778	32.4494	50	1000000021
90.6998	79.0475	45	50	1000000026
171.568	106.973	14.6523	50	1000000020
28.841	71.3583	20.4976	50	1000000025
80.2507	32.1145	14.7856	51	1000000000
120.355	72.675	11.6549	51	1000000018
146.312	46.5951	13.6244	51	1000000003
99.0642	60.2371	13.9542	51	1000000002
126.37	47.1956	15.343	51	1000000005
126.887	24.6038	17.4628	51	1000000001
85.5454	62.5142	18.4967	51	1000000012
107.733	73.0395	19.7142	51	1000000004
114.887	9.37515	24.6969	51	1000000015
131.145	46.0662	24.4033	51	1000000006
150.992	36.7408	30.1236	51	1000000007
176.556	79.9523	13.3837	51	1000000008
191.873	67.3163	14.5918	51	1000000023
163.242	15.9597	18.7953	51	1000000016
72.5741	158.171	5.91774	51	1000000009
62.0001	104.91	13.4337	51	1000000010
77.9714	147.97	25.9211	51	1000000017
159.912	105.514	23.639	51	1000000019
104.119	170.18	23.3952	51	1000000013
126.339	172.135	22.0802	51	1000000011
150.356	173.458	24.5805	51	1000000022
166.766	176.708	19.6899	51	1000000024
113.368	163.028	33.1934	51	1000000021
92.1721	78.6714	45	51	1000000026
171.944	107.698	15.1114	51	1000000020
26.9799	70.9014	20.4854	51	1000000025
120.037	73.0368	11.8876	52	1000000018
145.93	48.6032	13.175	52	1000000003
125.911	25.3797	15.8915	52	1000000001
81.9802	31.5226	14.524	52	1000000000
126.698	47.5431	15.5027	52	1000000005
99.3752	59.9026	15.0641	52	1000000002
85.5208	62.7153	19.4252	52	1000000012
106.691	73.6212	20.1551	52	1000000004
115.315	8.57807	24.374	52	1000000015
131.824	45.855	25.2226	52	1000000006
151.063	38.3824	31.4282	52	1000000007
177.172	80.7031	13.1714	52	1000000008
191.873	68.3427	14.7527	52	1000000023
163.205	15.9338	18.5145	52	1000000016
72.6011	158.337	5.97151	52	1000000009
63.7437	104.956	14.6179	52	1000000010
75.3182	146.213	26.6702	52	1000000017
161.061	105.172	24.5539	52	1000000019
104.208	168.429	22.708	52	1000000013
127.937	173.163	23.0976	52	1000000011
151.777	174.632	25.3674	52	1000000022
167.263	176.512	20.118	52	1000000024
113.229	161.854	33.6713	52	1000000021
95.6785	82.8724	45	52	1000000026
172.362	108.075	15.8558	52	1000000020
24.8529	71.1583	21.2154	52	1000000025
82.6546	31.6889	13.769	53	1000000000
146.765	48.8502	12.8875	53	1000000003
120.574	72.6679	12.7516	53	1000000018
126.616	47.9147	15.5639	53	1000000005
99.9008	59.7933	15.2274	53	1000000002
125.092	24.4938	16.1976	53	1000000001
162.312	16.289	19.4404	53	1000000016
85.6739	62.2674	19.5023	53	1000000012
106.645	73.1294	19.6646	53	1000000004
114.347	8.75484	23.5101	53	1000000015
132.149	45.1106	24.726	53	1000000006
177.086	80.2409	13.5409	53	1000000008
191.873	68.5698	14.8635	53	1000000023
72.859	158.229	5.1537	53	1000000009
63.8721	103.378	15.1153	53	1000000010
73.0614	146.09	27.1928	53	1000000017
160.803	103.947	24.7555	53	1000000019
104.351	167.104	21.7403	53	1000000013
128.924	173.471	22.3698	53	1000000011
151.833	174.04	25.2187	53	1000000022
166.515	176.034	21.0619	53	1000000024
150.107	37.6161	32.5855	53	1000000007
112.079	160.665	34.5091	53	1000000021
94.5082	83.0861	45	53	1000000026
172.285	106.94	16.4942	53	1000000020
23.9278	71.6141	20.1703	53	1000000025
84.3664	31.3863	13.3138	54	1000000000
147.315	50.0327	12.8376	54	1000000003
120.295	72.6339	12.2967	54	1000000018
124.837	24.2361	15.008	54	1000000001
126.482	47.5091	15.4981	54	1000000005
100.319	59.2022	16.2838	54	1000000002
161.186	16.0131	19.3561	54	1000000016
84.7671	61.5409	19.5585	54	1000000012
103.661	74.6677	20.8526	54	1000000004
114.301	7.48048	24.1144	54	1000000015
131.557	44.3215	25.0093	54	1000000006
176.087	79.4901	13.532	54	1000000008
191.873	68.2585	14.2269	54	1000000023
72.9786	158.134	6.1828	54	1000000009
63.389	102.181	15.1362	54	1000000010
72.393	146.187	30.3026	54	1000000017
161.411	104.065	24.6214	54	1000000019
104.781	166.274	20.7956	54	1000000013
129.758	173.221	22.2692	54	1000000011
165.629	175.683	21.2892	54	1000000024
150.756	34.6948	34.8093	54	1000000007
110.998	159.947	33.4802	54	1000000021
93.7374	83.2873	45	54	1000000026
149.09	172.531	25.7632	54	1000000022
172.32	107.755	16.5167	54	1000000020
20.6701	71.6942	19.4853	54	1000000025
84.8239	31.7457	13.9211	55	1000000000
148.231	50.0738	13.0535	55	1000000003
119.975	72.1637	12.4544	55	1000000018
125.14	23.6313	14.7951	55	1000000001
126.542	47.9593	15.9492	55	1000000005
101.489	59.1454	16.2857	55	1000000002
84.0698	61.0938	19.533	55	1000000012
160.205	16.4112	20.4159	55	1000000016
102.706	74.3088	21.1559	55	1000000004
114.468	7.06298	23.2654	55	1000000015
130.798	43.6476	24.8782	55	1000000006
191.873	68.1504	13.8267	55	1000000023
176.557	78.4266	13.5641	55	1000000008
72.9715	158.18	6.85297	55	1000000009
62.8934	101.36	14.9178	55	1000000010
70.9631	146.313	30.62	55	1000000017
161.51	103.633	24.291	55	1000000019
104.545	164.084	19.8664	55	1000000013
131.659	171.415	20.4473	55	1000000011
165.309	175.888	22.0772	55	1000000024
152.012	29.6596	35.6858	55	1000000007
109.921	159.318	33.7534	55	1000000021
94.6924	85.6454	40.4823	55	1000000026
151.207	172.904	26.6978	55	1000000022
171.005	107.376	15.8297	55	1000000020
20.1499	72.5915	19.2332	55	1000000025
84.6843	31.3485	13.6794	56	1000000000
147.683	50.8398	12.9593	56	1000000003
120.384	72.6275	12.3021	56	1000000018
124.855	23.0435	14.6914	56	1000000001
101.536	58.652	15.65	56	1000000002
125.849	47.9189	16.1972	56	1000000005
158.584	16.6846	19.4813	56	1000000016
82.8661	60.7153	19.2372	56	1000000012
101.639	74.9272	20.49	56	1000000004
115.155	6.75168	23.4372	56	1000000015
131.326	43.4183	24.6598	56	1000000006
191.873	68.0943	13.9923	56	1000000023
177.654	78.034	13.887	56	1000000008
72.8684	157.554	6.81402	56	1000000009
61.8819	99.8836	14.9573	56	1000000010
160.784	103.037	23.4774	56	1000000019
105.197	163.284	18.6531	56	1000000013
132.079	170.831	20.1484	56	1000000011
165.11	176.291	22.8789	56	1000000024
153.562	28.3882	34.9358	56	1000000007
71.4316	145.619	33.0256	56	1000000017
109.932	157.829	33.1645	56	1000000021
96.7598	85.7514	39.4402	56	1000000026
151.574	173.354	27.9125	56	1000000022
172.113	108.402	17.0666	56	1000000020
20.4314	73.3545	19.4	56	1000000025
177.057	149.103	45	56	1000000027
84.6967	31.7409	13.6404	57	1000000000
147.885	51.0961	12.7243	57	1000000003
120.449	72.4966	12.2952	57	1000000018
124.161	22.3607	14.5788	57	1000000001
124.918	48.8551	16.2161	57	1000000005
101.387	57.7737	16.2773	57	1000000002
156.593	15.8306	19.1189	57	1000000016
82.7887	61.0499	19.5652	57	1000000012
101.372	74.8587	20.3473	57	1000000004
114.505	6.63784	22.7889	57	1000000015
130.982	43.829	25.2829	57	1000000006
191.873	67.8468	13.5843	57	1000000023
178.232	77.2574	13.8733	57	1000000008
72.9163	157.955	6.59543	57	1000000009
60.439	99.0413	15.231	57	1000000010
71.5774	144.774	31.9668	57	1000000017
106.487	161.485	18.2011	57	1000000013
160.285	101.75	22.5061	57	1000000019
133.661	170.428	19.409	57	1000000011
165.06	175.55	23.2932	57	1000000024
154.41	27.9517	32.573	57	1000000007
108.674	157.377	34.0869	57	1000000021
98.5309	86.5057	38.621	57	1000000026
151.729	172.977	26.1621	57	1000000022
173.007	109.028	16.6542	57	1000000020
20.0944	74.1191	18.8427	57	1000000025
175.562	151.532	43	57	1000000027
148.058	51.2221	12.4486	58	1000000003
120.579	72.5186	12.6047	58	1000000018
122.957	22.8247	14.6097	58	1000000001
84.0642	32.0341	14.2269	58	1000000000
152.876	15.5894	17.91	58	1000000016
123.988	49.7133	16.6799	58	1000000005
100.772	57.3909	16.0791	58	1000000002
81.5348	60.342	19.4849	58	1000000012
100.248	74.9749	20.2063	58	1000000004
112.484	7.08643	22.6157	58	1000000015
130.398	43.7163	25.8997	58	1000000006
157.173	28.7532	30.1973	58	1000000007
191.873	67.4006	13.9388	58	1000000023
177.245	77.4443	13.6916	58	1000000008
72.5948	157.575	6.53519	58	1000000009
58.5422	97.6554	14.6985	58	1000000010
70.0214	144.153	31.4751	58	1000000017
106.837	160.2	17.8441	58	1000000013
159.906	100.903	22.7166	58	1000000019
133.891	169.32	18.9594	58	1000000011
164.741	174.683	22.7567	58	1000000024
107.612	158.241	33.4327	58	1000000021
98.5169	85.9757	38.6072	58	1000000026
148.173	170.157	24.3231	58	1000000022
172.876	108.425	15.2747	58	1000000020
19.867	74.1449	18.9998	58	1000000025
176.258	152.728	41	58	1000000027
80.8695	60.121	19.8401	59	1000000012
148.026	50.869	12.9072	59	1000000003
119.616	73.3708	12.7339	59	1000000018
122.391	22.8259	14.4209	59	1000000001
83.9846	32.0595	14.9423	59	1000000000
100.928	57.4596	15.9865	59	1000000002
150.24	16.1087	17.4816	59	1000000016
123.825	49.422	17.1632	59	1000000005
112.319	8.72076	21.9363	59	1000000015
100.038	75.6185	20.0964	59	1000000004
131.316	43.2555	26.5843	59	1000000006
161.81	30.7435	31.7376	59	1000000007
176.119	77.8225	13.4346	59	1000000008
191.873	67.5687	14.2048	59	1000000023
72.7085	157.695	6.48736	59	1000000009
57.5034	97.5408	12.9366	59	1000000010
70.3352	144.19	29.5836	59	1000000017
108.662	158.197	16.9888	59	1000000013
158.997	100.455	22.6941	59	1000000019
132.847	168.631	18.3269	59	1000000011
164.976	173.945	22.7685	59	1000000024
106.669	158.399	32.883	59	1000000021
99.17	86.6978	37.7591	59	1000000026
148.075	168.813	24.1163	59	1000000022
172.727	107.429	16.3649	59	1000000020
19.4573	72.9212	19.3074	59	1000000025
176.974	152.494	43	59	1000000027
80.9687	59.4212	19.0787	60	1000000012
148.446	51.3298	12.7228	60	1000000003
120.043	72.6164	12.4072	60	1000000018
121.642	24.7066	14.761	60	1000000001
84.1584	31.9424	14.3073	60	1000000000
148.253	15.9988	17.0362	60	1000000016
123.739	49.4033	17.0488	60	1000000005
100.967	57.1743	16.2419	60	1000000002
98.9396	75.2623	19.6289	60	1000000004
112.818	8.4064	22.8556	60	1000000015
131.442	43.2517	25.7989	60	1000000006
174.875	78.0807	13.2217	60	1000000008
191.873	68.0855	14.7533	60	1000000023
163.718	32.4821	31.8985	60	1000000007
72.9769	157.458	6.22677	60	1000000009
57.6239	96.4145	12.6971	60	1000000010
70.1172	143.495	27.7257	60	1000000017
109.656	156.086	15.686	60	1000000013
158.937	100.706	22.0628	60	1000000019
103.567	155.308	31.7212	60	1000000021
132.499	168.064	17.3463	60	1000000011
165.232	173.977	22.1688	60	1000000024
97.9558	86.8197	36.7853	60	1000000026
147.758	168.963	23.8296	60	1000000022
173.034	107.608	15.776	60	1000000020
19.4559	71.783	20.2085	60	1000000025
173.731	152.541	39	60	1000000027
80.6035	58.9125	18.5323	61	1000000012
120.027	74.0713	11.5384	61	1000000018
84.6429	32.1032	13.8448	61	1000000000
148.549	51.5419	13.0434	61	1000000003
120.321	25.6406	15.3518	61	1000000001
146.705	16.7513	17.6932	61	1000000016
123.281	49.6537	16.648	61	1000000005
101.069	58.0489	16.4204	61	1000000002
97.7584	75.3729	19.5394	61	1000000004
113.85	8.59799	21.8569	61	1000000015
132.064	43.7344	24.9717	61	1000000006
173.898	78.3606	13.1316	61	1000000008
191.873	69.0515	14.963	61	1000000023
73.3078	157.582	5.83936	61	1000000009
58.0791	96.73	13.5736	61	1000000010
70.0112	143.141	26.9063	61	1000000017
110.237	155.386	15.8474	61	1000000013
158.033	100.029	21.4999	61	1000000019
100.772	153.737	29.0456	61	1000000021
131.346	166.578	16.8356	61	1000000011
165.305	173.428	22.0888	61	1000000024
163.843	32.307	32.8711	61	1000000007
99.29	87.6774	36.381	61	1000000026
145.925	168.851	24.7462	61	1000000022
172.591	107.756	15.6398	61	1000000020
17.5353	70.4888	21.0366	61	1000000025
171.153	153.247	37	61	1000000027
79.656	59.2675	18.6684	62	1000000012
119.83	72.7679	11.2225	62	1000000018
84.664	32.2053	13.4692	62	1000000000
148.277	50.6375	12.5645	62	1000000003
119.526	26.4565	15.8224	62	1000000001
121.649	48.9369	16.5746	62	1000000005
100.328	57.8387	16.1053	62	1000000002
95.7447	74.4133	19.6868	62	1000000004
114.346	8.78093	22.2807	62	1000000015
130.847	43.0842	23.6648	62	1000000006
174.084	77.7623	12.7291	62	1000000008
191.873	68.9502	14.5447	62	1000000023
73.0253	157.87	5.76065	62	1000000009
58.2671	96.4591	13.9398	62	1000000010
68.8594	142.357	26.276	62	1000000017
109.942	154.85	15.4308	62	1000000013
157.685	99.0194	21.002	62	1000000019
98.5909	154.3	28.0401	62	1000000021
130.157	166.362	16.0618	62	1000000011
164.282	172.953	21.964	62	1000000024
166.192	31.271	36.3981	62	1000000007
99.5215	89.3922	33.3757	62	1000000026
146.147	17.075	17.004	62	1000000016
144.82	169.482	23.2889	62	1000000022
172.633	107.127	14.9308	62	1000000020
16.7918	68.8756	20.3189	62	1000000025
168.462	152.62	37	62	1000000027
79.957	58.8724	18.6684	63	1000000012
120.071	73.5231	11.4565	63	1000000018
84.8315	32.1822	13.9215	63	1000000000
148.333	50.5156	12.3653	63	1000000003
118.727	29.386	15.7937	63	1000000001
121.201	48.2858	17.0405	63	1000000005
99.8916	57.7634	16.6649	63	1000000002
145.422	22.0124	19.0455	63	1000000016
93.3421	74.1713	20.6507	63	1000000004
115.145	9.04433	22.7274	63	1000000015
131.896	41.6577	23.7293	63	1000000006
172.703	78.8931	11.7424	63	1000000008
191.873	68.5526	14.3563	63	1000000023
72.6429	156.862	6.16993	63	1000000009
58.6091	95.9326	14.295	63	1000000010
68.3703	141.983	23.6068	63	1000000017
109.765	155.266	15.6174	63	1000000013
157.613	99.2758	21.176	63	1000000019
97.766	153.935	29.0511	63	1000000021
128.365	165.692	15.3615	63	1000000011
163.474	172.694	21.614	63	1000000024
165.28	30.6074	37.2402	63	1000000007
100.88	90.3527	32.546	63	1000000026
144.597	169.649	23.0215	63	1000000022
173.089	107.409	14.7345	63	1000000020
16.3188	66.2036	20.1498	63	1000000025
168.875	153.073	35	63	1000000027
79.9531	58.7991	17.4438	64	1000000012
121.053	74.1189	11.8125	64	1000000018
148.789	50.9767	12.6495	64	1000000003
118.879	30.6369	15.4432	64	1000000001
85.4448	32.5596	14.3543	64	1000000000
120.108	47.6737	17.743	64	1000000005
99.0941	57.9058	16.5592	64	1000000002
115.035	9.57682	21.9293	64	1000000015
144.725	24.246	20.5163	64	1000000016
92.4797	73.9494	20.7088	64	1000000004
131.968	40.3769	24.094	64	1000000006
172.83	79.2066	11.6609	64	1000000008
191.873	68.0572	14.1569	64	1000000023
72.3191	156.302	5.82009	64	1000000009
59.274	95.0943	14.3684	64	1000000010
68.4253	139.439	22.6604	64	1000000017
109.659	154.455	15.2968	64	1000000013
157.063	99.4024	21.1792	64	1000000019
99.6649	90.0247	29.9963	64	1000000026
96.1779	153.555	29.4312	64	1000000021
127.447	165.031	14.4807	64	1000000011
162.871	172.827	21.1602	64	1000000024
166.481	28.0457	38.5836	64	1000000007
143.126	170.126	23.0773	64	1000000022
172.319	107.819	14.8818	64	1000000020
16.8253	63.5165	22.3884	64	1000000025
167.921	153.569	35	64	1000000027
79.7285	58.5188	17.8159	65	1000000012
122.382	74.2496	11.1302	65	1000000018
119.461	31.4175	13.461	65	1000000001
149.764	51.6862	12.275	65	1000000003
85.7016	32.9286	14.427	65	1000000000
120.937	48.1634	16.9918	65	1000000005
98.4767	57.6113	16.4665	65	1000000002
141.165	24.4459	19.9615	65	1000000016
113.69	10.4302	21.3812	65	1000000015
91.776	72.8182	20.7438	65	1000000004
132.453	40.1706	23.1236	65	1000000006
173.717	79.6932	12.1745	65	1000000008
191.873	67.724	14.7554	65	1000000023
73.0932	156.699	6.12894	65	1000000009
59.9765	94.4755	14.2671	65	1000000010
68.7136	139.643	22.2512	65	1000000017
109.178	154.293	16.4523	65	1000000013
157.501	99.8205	21.269	65	1000000019
99.6823	90.1738	29.7882	65	1000000026
95.2932	153.745	30.7418	65	1000000021
125.545	163.262	14.172	65	1000000011
162.145	172.211	22.081	65	1000000024
167.424	25.4811	40.1708	65	1000000007
142.929	169.811	22.4737	65	1000000022
172.973	107.735	14.9907	65	1000000020
15.859	62.0768	20.2552	65	1000000025
169.356	155.728	35	65	1000000027
80.1895	58.9254	17.5802	66	1000000012
122.62	75.3351	11.4015	66	1000000018
120.003	31.2986	13.4593	66	1000000001
150.847	51.6645	12.2873	66	1000000003
85.736	32.7884	14.123	66	1000000000
120.447	47.636	17.2385	66	1000000005
98.5956	56.9157	16.7565	66	1000000002
114.149	10.6656	21.4039	66	1000000015
139.35	23.493	20.6412	66	1000000016
89.8768	72.2397	20.7602	66	1000000004
132.344	39.0203	22.4713	66	1000000006
173.068	80.0749	11.7957	66	1000000008
191.873	68.4591	14.663	66	1000000023
73.5629	157.19	6.72737	66	1000000009
60.665	94.4737	14.2252	66	1000000010
68.1626	139.215	22.5219	66	1000000017
124.364	162.218	14.4796	66	1000000011
110.581	153.303	17.4429	66	1000000013
158.06	99.3656	20.3094	66	1000000019
99.347	90.0298	29.5269	66	1000000026
93.1857	153.368	29.8309	66	1000000021
161.175	171.935	21.2929	66	1000000024
169.07	25.1215	41.262	66	1000000007
141.118	169.818	21.7123	66	1000000022
172.922	107.475	14.9682	66	1000000020
15.1538	60.6303	20.9904	66	1000000025
165.425	154.262	33	66	1000000027
79.5248	58.9809	18.1539	67	1000000012
122.896	75.8786	11.2447	67	1000000018
120.842	32.0279	12.5035	67	1000000001
151.226	52.3288	12.5804	67	1000000003
85.4954	32.6458	14.2127	67	1000000000
121.14	48.6283	17.3841	67	1000000005
99.1185	56.3407	16.5864	67	1000000002
137.717	21.8594	19.9558	67	1000000016
114.025	10.5661	21.1164	67	1000000015
88.3905	71.3735	20.6335	67	1000000004
131.481	37.1905	22.1004	67	1000000006
173.79	80.4381	12.4333	67	1000000008
191.873	69.2499	15.6195	67	1000000023
74.3036	156.746	6.42597	67	1000000009
61.2021	94.6023	14.5369	67	1000000010
66.2949	138.613	23.5494	67	1000000017
123.154	162.389	15.2481	67	1000000011
111.817	152.661	18.6174	67	1000000013
157.754	98.4528	20.7582	67	1000000019
98.3537	89.4388	27.7833	67	1000000026
93.2866	152.468	28.9426	67	1000000021
160.845	171.687	21.4389	67	1000000024
170.03	26.3052	39.5629	67	1000000007
139.329	170.292	21.7524	67	1000000022
172.71	107.634	15.156	67	1000000020
13.4158	59.5706	20.7494	67	1000000025
164.996	153.204	29	67	1000000027
79.2516	58.7366	18.5744	68	1000000012
123.548	76.9707	11.1402	68	1000000018
85.0096	32.0063	13.6747	68	1000000000
121.203	32.9108	12.7808	68	1000000001
151.427	51.7256	12.287	68	1000000003
97.9614	55.775	15.8953	68	1000000002
114.679	9.77478	19.8264	68	1000000015
137.093	21.2025	19.4211	68	1000000016
120.629	49.3037	18.3102	68	1000000005
131.646	37.4431	21.7312	68	1000000006
87.1577	70.6098	21.1085	68	1000000004
174.143	81.3451	12.218	68	1000000008
191.873	68.5953	15.3401	68	1000000023
74.1884	156.806	6.61179	68	1000000009
60.1831	95.0683	14.2664	68	1000000010
63.5403	140.983	24.5198	68	1000000017
121.341	161.279	14.7568	68	1000000011
156.919	99.5381	19.8614	68	1000000019
111.198	151.985	18.1559	68	1000000013
98.5322	88.5342	26.7774	68	1000000026
91.2637	151.944	28.6912	68	1000000021
160.727	171.057	20.3115	68	1000000024
170.373	28.0692	36.9299	68	1000000007
138.046	169.765	20.7285	68	1000000022
172.314	108.231	14.883	68	1000000020
13.4099	58.3742	20.8597	68	1000000025
165.28	152.966	27	68	1000000027
77.7104	58.4226	18.6896	69	1000000012
123.544	77.273	11.054	69	1000000018
84.7115	31.3418	13.8922	69	1000000000
121.021	32.9199	12.6526	69	1000000001
151.656	50.5419	13.2335	69	1000000003
97.6895	54.6511	15.7851	69	1000000002
121.506	50.1926	17.7628	69	1000000005
136.726	20.5463	18.3743	69	1000000016
115.088	9.68725	20.5846	69	1000000015
131.885	37.6339	21.7913	69	1000000006
85.0051	69.6965	20.3636	69	1000000004
173.868	80.517	11.5806	69	1000000008
191.873	69.1963	15.868	69	1000000023
74.0182	156.913	7.05773	69	1000000009
60.3694	96.9729	15.4867	69	1000000010
63.25	141.506	25.8528	69	1000000017
120.029	159.659	14.5159	69	1000000011
110.611	150.902	17.8173	69	1000000013
156.818	98.718	20.2596	69	1000000019
100.071	89.0082	24.9565	69	1000000026
87.8424	150.189	30.169	69	1000000021
160.117	170.86	19.5074	69	1000000024
169.988	28.3911	32.3266	69	1000000007
136.576	169.583	21.044	69	1000000022
172.39	107.147	14.798	69	1000000020
12.5591	57.0405	20.3156	69	1000000025
163.446	153.482	19	69	1000000027
76.2977	58.0341	18.7772	70	1000000012
124.277	77.4186	10.9232	70	1000000018
119.979	34.7597	12.6488	70	1000000001
83.3642	30.7049	14.8466	70	1000000000
151.019	50.2301	14.7226	70	1000000003
135.332	19.3018	17.5877	70	1000000016
120.712	50.7847	17.3294	70	1000000005
96.7135	53.3595	16.4474	70	1000000002
115.381	9.33741	19.5972	70	1000000015
131.754	38.3098	21.5837	70	1000000006
84.1484	68.6954	20.6186	70	1000000004
174.215	81.1189	11.6479	70	1000000008
191.873	69.1975	15.5478	70	1000000023
74.0319	156.733	7.09766	70	1000000009
60.8474	98.5365	16.4245	70	1000000010
64.4745	140.006	25.4003	70	1000000017
117.831	158.646	13.5879	70	1000000011
112.186	149.536	18.5172	70	1000000013
156.892	99.2434	21.0446	70	1000000019
99.8256	89.2198	22.9544	70	1000000026
160.287	170.816	18.9418	70	1000000024
86.113	148.515	32.5308	70	1000000021
168.388	28.4323	28.6453	70	1000000007
135.832	169.333	19.9703	70	1000000022
172.766	108.159	15.3201	70	1000000020
12.1855	55.6515	18.9368	70	1000000025
162.333	151.604	25	70	1000000027
75.1572	58.6839	18.3652	71	1000000012
124.736	77.3997	11.1018	71	1000000018
119.058	35.951	12.9801	71	1000000001
82.6682	29.5507	15.0146	71	1000000000
151.191	49.5944	15.8443	71	1000000003
120.132	51.7373	17.2062	71	1000000005
96.693	52.7357	16.7789	71	1000000002
114.788	9.72698	19.8535	71	1000000015
133.104	17.3604	18.3552	71	1000000016
84.2505	68.2888	20.804	71	1000000004
131.582	38.9377	22.5368	71	1000000006
174.402	81.161	11.1601	71	1000000008
191.873	69.1212	15.8695	71	1000000023
74.0112	156.462	7.25584	71	1000000009
60.1007	99.9966	15.2775	71	1000000010
64.3483	139.437	25.7464	71	1000000017
117.8	157.974	13.3567	71	1000000011
112.786	150.132	18.5076	71	1000000013
157.576	99.5783	20.618	71	1000000019
99.4946	89.1554	22.0608	71	1000000026
160.478	170.861	18.1108	71	1000000024
84.1676	146.734	33.5598	71	1000000021
169.012	27.8877	28.9603	71	1000000007
134.594	167.988	19.653	71	1000000022
173.705	105.823	15.1881	71	1000000020
12.9903	54.4233	18.376	71	1000000025
162.755	149.616	27	71	1000000027
73.4894	58.9151	18.83	72	1000000012
126.401	77.5918	10.6513	72	1000000018
119.006	35.8519	12.5673	72	1000000001
79.4537	25.1415	15.8482	72	1000000000
132.493	15.4529	17.714	72	1000000016
151.579	49.4562	16.6257	72	1000000003
96.4959	51.5922	16.6348	72	1000000002
120.294	51.9507	16.9092	72	1000000005
114.342	9.0556	19.4022	72	1000000015
83.8026	67.2	19.3169	72	1000000004
132.147	39.1216	21.8136	72	1000000006
174.276	81.3964	11.149	72	1000000008
191.873	69.2348	16.1546	72	1000000023
74.4027	156.69	6.89703	72	1000000009
59.6187	100.981	14.686	72	1000000010
63.4566	137.864	25.8012	72	1000000017
117.383	157.902	13.1161	72	1000000011
98.0292	89.1687	20.2187	72	1000000026
157.765	99.5606	20.5411	72	1000000019
160.736	170.585	17.2149	72	1000000024
82.8327	145.543	35.3566	72	1000000021
105.97	154.879	15.0931	72	1000000013
167.714	27.3054	27.6269	72	1000000007
133.893	168.067	19.0064	72	1000000022
174.102	107.016	14.961	72	1000000020
12.2396	52.9173	17.8024	72	1000000025
161.231	148.875	27	72	1000000027
73.0438	59.0158	19.8108	73	1000000012
119.458	36.825	11.8755	73	1000000001
127.723	78.1032	10.473	73	1000000018
132.049	13.2774	17.6663	73	1000000016
150.998	49.5293	16.7463	73	1000000003
96.3561	50.0851	16.8802	73	1000000002
119.952	52.4036	17.0942	73	1000000005
113.63	8.78311	19.3478	73	1000000015
83.2515	66.4496	19.3888	73	1000000004
132.19	39.0567	21.0883	73	1000000006
191.873	69.7125	16.1973	73	1000000023
74.5117	156.955	7.27799	73	1000000009
58.4855	101.527	13.3617	73	1000000010
63.1992	136.067	25.5104	73	1000000017
117.115	158.159	13.3675	73	1000000011
97.7343	89.572	18.9761	73	1000000026
158.168	100.025	19.7627	73	1000000019
174.646	81.9121	11.0727	73	1000000008
160.306	171.314	16.4978	73	1000000024
81.6748	143.661	37.2436	73	1000000021
111.688	149.717	19.0422	73	1000000013
78.3732	23.8074	15.7567	73	1000000000
167.609	26.4476	26.6133	73	1000000007
132.258	168.275	18.5863	73	1000000022
174.153	107.399	15.4243	73	1000000020
12.4643	49.4303	18.7136	73	1000000025
160.983	148.996	25	73	1000000027
72.309	58.1901	19.7775	74	1000000012
129.506	78.1345	10.3318	74	1000000018
122.891	36.3828	13.2967	74	1000000001
151.594	48.7772	16.7314	74	1000000003
97.2695	49.3289	17.6257	74	1000000002
120.729	52.5648	17.5852	74	1000000005
113.721	7.74919	18.537	74	1000000015
132.866	9.92766	18.2092	74	1000000016
83.5004	65.3951	18.9302	74	1000000004
132.849	39.4365	20.7039	74	1000000006
191.873	69.9089	16.0747	74	1000000023
75.0774	157.411	7.17057	74	1000000009
59.1435	100.926	12.9078	74	1000000010
64.0086	135.076	23.0012	74	1000000017
116.575	158.825	13.323	74	1000000011
97.9982	89.3016	18.2402	74	1000000026
158.05	99.8095	19.6966	74	1000000019
113.265	150.279	18.3335	74	1000000013
174.676	81.832	11.4009	74	1000000008
159.743	170.925	16.7759	74	1000000024
81.5131	142.847	36.9759	74	1000000021
77.213	23.2627	15.6363	74	1000000000
165.15	25.5555	25.0429	74	1000000007
130.656	167.578	17.5205	74	1000000022
173.116	106.718	15.1258	74	1000000020
11.5807	48.0431	18.7875	74	1000000025
158.461	148.266	27	74	1000000027
72.5152	57.0519	20.9807	75	1000000012
129.344	78.1942	9.77061	75	1000000018
124.384	36.069	13.4872	75	1000000001
151.438	48.1475	16.8091	75	1000000003
114.092	7.44467	18.4592	75	1000000015
133.069	8.00791	18.4289	75	1000000016
97.279	47.6713	18.3363	75	1000000002
120.059	51.8645	18.5355	75	1000000005
84.2925	64.2856	18.1602	75	1000000004
131.013	39.0224	20.8336	75	1000000006
191.873	69.9179	16.911	75	1000000023
75.766	158.632	7.46978	75	1000000009
59.5447	101.076	12.8648	75	1000000010
65.1284	135.61	20.8764	75	1000000017
116.642	160.225	13.84	75	1000000011
96.6677	88.7079	17.3808	75	1000000026
158.431	99.4124	19.6003	75	1000000019
113.214	150.912	18.826	75	1000000013
174.456	82.5972	11.8456	75	1000000008
159.089	171.161	16.1882	75	1000000024
81.75	141.472	37.0575	75	1000000021
78.0252	21.9256	15.1056	75	1000000000
162.805	23.2755	24.4961	75	1000000007
130.445	168.831	17.1966	75	1000000022
172.659	107.561	14.4953	75	1000000020
11.3388	46.5691	18.6347	75	1000000025
159.952	147.836	29	75	1000000027
72.3346	58.1	22.4771	76	1000000012
129.913	78.5646	10.4971	76	1000000018
126.134	39.3832	12.9125	76	1000000001
133.281	9.51483	17.8105	76	1000000016
151.314	48.6318	16.6441	76	1000000003
84.6157	63.666	17.9328	76	1000000004
113.925	7.41309	18.6664	76	1000000015
97.5278	46.5745	19.4601	76	1000000002
120.239	53.0348	18.695	76	1000000005
129.444	39.9076	21.8963	76	1000000006
191.873	70.3797	15.7009	76	1000000023
75.6201	158.956	6.83237	76	1000000009
60.1477	100.706	12.7795	76	1000000010
62.6856	133.914	21.0792	76	1000000017
118.038	159.98	14.3824	76	1000000011
95.8422	87.5644	16.5083	76	1000000026
158.416	98.7805	19.5753	76	1000000019
112.744	150.765	19.8433	76	1000000013
174.48	83.2003	11.4723	76	1000000008
159.277	170.951	16.428	76	1000000024
80.506	139.716	36.5699	76	1000000021
78.1715	21.3696	15.1536	76	1000000000
160.118	23.7005	23.6943	76	1000000007
130.312	169.177	16.6405	76	1000000022
172.085	106.919	13.527	76	1000000020
11.9966	43.7661	17.5035	76	1000000025
156.341	148.369	27	76	1000000027
72.6149	58.3558	22.5801	77	1000000012
127.433	41.2733	11.3393	77	1000000001
130.741	79.0146	10.9462	77	1000000018
150.399	48.5799	16.8968	77	1000000003
85.6911	63.7172	17.7844	77	1000000004
113.348	8.35207	18.3567	77	1000000015
134.638	9.42727	18.6807	77	1000000016
96.4545	45.375	19.0013	77	1000000002
119.877	53.0058	18.2798	77	1000000005
128.628	40.8556	22.3622	77	1000000006
191.873	70.3345	16.306	77	1000000023
75.3225	159.608	6.76441	77	1000000009
61.3636	102.088	12.6033	77	1000000010
63.1176	132.773	20.7426	77	1000000017
94.2759	88.237	15.6688	77	1000000026
119.472	159.896	15.6436	77	1000000011
158.997	98.1447	19.5301	77	1000000019
111.178	150.587	20.8579	77	1000000013
174.523	84.3155	11.2881	77	1000000008
159.85	169.75	16.8493	77	1000000024
79.896	137.068	37.5324	77	1000000021
77.6211	20.2892	15.3789	77	1000000000
159.974	24.5164	24.7004	77	1000000007
130.554	168.54	16.7938	77	1000000022
171.557	108.306	14.6528	77	1000000020
10.6821	41.5705	16.1656	77	1000000025
156.692	148.381	27	77	1000000027
70.8845	58.3548	22.4313	78	1000000012
127.735	41.6031	11.1905	78	1000000001
130.911	78.9332	10.7671	78	1000000018
150.731	47.7985	17.4984	78	1000000003
119.865	53.6276	17.4278	78	1000000005
85.5367	63.4012	17.4643	78	1000000004
114.008	7.99912	18.571	78	1000000015
135.22	8.92628	19.4336	78	1000000016
96.4464	44.4063	18.5018	78	1000000002
127.687	40.221	20.9361	78	1000000006
186.529	75.832	13.7641	78	1000000023
75.457	160.515	6.91725	78	1000000009
62.5795	103.354	12.6718	78	1000000010
63.0602	132.153	21.2871	78	1000000017
92.5348	91.2618	14.7974	78	1000000026
119.92	160.468	16.7525	78	1000000011
158.194	97.8162	18.9529	78	1000000019
[truncated: 571 more rows]

## Sheet: NCadM-3-ControlSide
Position
Position X	Position Y	Position Z	Time	TrackID
94.8254	71.0232	8.76457	1	1000000000
145.233	24.6574	19.5338	1	1000000001
99.6768	1.12443	23.5863	1	1000000002
108.631	43.0406	27.4863	1	1000000003
81.3904	156.697	16.1393	1	1000000004
133.051	111.084	2.04628	1	1000000005
152.233	109.886	16.2925	1	1000000006
119.715	109.031	20.1678	1	1000000007
95.7433	151.368	22.0995	1	1000000008
149.186	161.866	25.5478	1	1000000009
185.893	88.0388	18.7329	1	1000000010
68.077	186.671	21.5391	1	1000000011
104.13	202.593	13.3076	1	1000000012
90.8547	203.257	12.0397	1	1000000013
117.483	165.988	19.1452	1	1000000014
167.685	179.407	20.351	1	1000000015
53.3128	124.204	37.1773	1	1000000016
74.1428	89.5499	43	1	1000000017
112.927	140.293	37.4171	1	1000000018
140.111	184.206	39.1142	1	1000000019
94.1203	71.288	8.50056	2	1000000000
144.722	24.763	20.9706	2	1000000001
99.9724	0.318198	25.2418	2	1000000002
108.871	42.5989	25.7208	2	1000000003
133.999	110.799	2.48643	2	1000000005
83.347	155.362	15.0426	2	1000000004
149.158	109.636	16.275	2	1000000006
121.578	108.251	18.5192	2	1000000007
95.9336	152.46	20.2101	2	1000000008
149.504	162.431	25.2295	2	1000000009
185.615	89.0197	19.7811	2	1000000010
69.8383	188.101	20.2162	2	1000000011
90.2401	203.145	11.8588	2	1000000013
104.522	202.17	12.608	2	1000000012
116.794	164.338	19.3875	2	1000000014
167.572	179.861	21.6696	2	1000000015
54.8222	122.734	36.8901	2	1000000016
76.2681	87.3316	41.8341	2	1000000017
111.271	139.145	35.8009	2	1000000018
139.644	182.209	37.3701	2	1000000019
94.3674	71.6691	8.55877	3	1000000000
144.173	24.7656	22.7532	3	1000000001
102.02	2.13356	25.538	3	1000000002
109.333	41.4104	24.3742	3	1000000003
133.558	111.785	1	3	1000000005
83.3887	154.933	14.2283	3	1000000004
120.836	107.363	16.9347	3	1000000007
148.648	108.737	16.7194	3	1000000006
97.7385	153.289	18.3872	3	1000000008
151.864	162.552	25.3237	3	1000000009
185.096	90.5403	19.1517	3	1000000010
70.4796	187.667	20.6514	3	1000000011
104.033	200.842	12.2001	3	1000000012
91.2316	204.713	12.567	3	1000000013
115.501	163.321	20.1796	3	1000000014
166.418	179.599	23.7182	3	1000000015
55.7733	122.186	37.1143	3	1000000016
79.9455	84.4639	43	3	1000000017
111.072	134.877	36.9115	3	1000000018
139.806	181.033	37.1263	3	1000000019
93.5175	71.4068	8.31572	4	1000000000
103.3	5.22931	23.9448	4	1000000002
145.635	25.8959	23.3634	4	1000000001
111.017	41.9494	22.4771	4	1000000003
133.958	112.31	1	4	1000000005
83.5411	156.179	13.7721	4	1000000004
122.192	106.648	14.8126	4	1000000007
148.625	108.255	17.3548	4	1000000006
97.6646	154.1	17.1777	4	1000000008
153.37	162.568	25.7787	4	1000000009
185.548	92.1511	18.2268	4	1000000010
72.4974	187.821	19.7379	4	1000000011
106.52	201.284	10.9593	4	1000000012
92.131	205.938	12.0425	4	1000000013
116.49	163.431	19.278	4	1000000014
166.692	179.266	23.3211	4	1000000015
82.7671	81.1392	39.021	4	1000000017
58.4561	122.251	37.2882	4	1000000016
110.827	131.944	37.3048	4	1000000018
138.875	178.524	38.4554	4	1000000019
93.7277	71.6084	6.96318	5	1000000000
111.964	42.7199	21.1925	5	1000000003
105.195	7.74523	23.7294	5	1000000002
146.85	26.735	23.0577	5	1000000001
134.349	112.797	1	5	1000000005
158.208	99.4447	2.59063	5	1000000020
123.524	106.815	13.3508	5	1000000007
83.901	157.775	14.1166	5	1000000004
148.829	109.397	16.8502	5	1000000006
97.7312	154.571	16.3271	5	1000000008
154.228	161.764	24.95	5	1000000009
186.25	94.4177	15.4794	5	1000000010
78.0272	187.895	21.3911	5	1000000011
108.693	200.737	9.27376	5	1000000012
92.0704	206.481	11.9181	5	1000000013
116.3	163.319	19.6166	5	1000000014
166.859	179.252	23.0203	5	1000000015
85.0614	77.2438	38.071	5	1000000017
60.3379	121.953	36.3978	5	1000000016
109.718	130.105	37.0776	5	1000000018
137.855	175.357	37.3406	5	1000000019
29.2153	163.012	41.5396	5	1000000042
95.1758	69.0212	6.03971	6	1000000000
112.763	42.3313	20.5633	6	1000000003
148.066	26.2521	23.6621	6	1000000001
109.823	9.69207	25.0043	6	1000000002
134.061	112.866	1	6	1000000005
158.287	98.1485	2.52787	6	1000000020
124.809	104.607	12.718	6	1000000007
84.6829	158.521	12.4518	6	1000000004
149.137	108.448	17.2167	6	1000000006
97.448	154.84	16.823	6	1000000008
115.334	162.108	19.4915	6	1000000014
154.979	161.06	23.6675	6	1000000009
186.066	95.4124	13.078	6	1000000010
79.8636	188.294	22.1622	6	1000000011
110.087	201.484	10.6618	6	1000000012
91.3954	204.054	10.3815	6	1000000013
141.575	207.783	31.9093	6	1000000021
165.907	178.641	22.6933	6	1000000015
84.7868	74.8877	35.3009	6	1000000017
61.0849	120.73	34.9982	6	1000000016
109.66	128.074	37.14	6	1000000018
137.651	171.527	37.2069	6	1000000019
28.9723	161.064	43	6	1000000042
96.14	66.7259	6.58407	7	1000000000
114.258	42.5811	21.0688	7	1000000003
111.329	10.3597	24.9024	7	1000000002
147.668	25.0661	24.0751	7	1000000001
133.605	112.184	1	7	1000000005
157.633	97.7242	2.28128	7	1000000020
126.18	103.956	11.69	7	1000000007
97.0943	153.493	15.192	7	1000000008
83.4363	159.352	14.6084	7	1000000004
148.643	111.202	16.7425	7	1000000006
116.154	160	20.0964	7	1000000014
156.014	160.004	23.8351	7	1000000009
185.517	96.2788	10.0237	7	1000000010
176.371	110.686	12.946	7	1000000022
81.2322	188.554	21.2069	7	1000000011
90.1789	202.426	9.81827	7	1000000013
110.547	199.661	10.0673	7	1000000012
167.862	177.324	21.534	7	1000000015
83.9567	72.2521	35.318	7	1000000017
62.6687	120.227	34.1805	7	1000000016
111.987	128.86	34.678	7	1000000018
143.143	207.783	32.3812	7	1000000021
136.715	168.973	37.5374	7	1000000019
30.1838	160.4	40.8842	7	1000000042
96.9539	66.0163	4.7625	8	1000000000
115.115	44.9183	19.7593	8	1000000003
109.548	9.86183	24.693	8	1000000002
148.809	22.253	27.3535	8	1000000001
132.828	111.465	1	8	1000000005
158.969	98.1183	2.14747	8	1000000020
126.623	102.514	11.3139	8	1000000007
84.8679	160.617	13.2311	8	1000000004
97.5493	153.14	14.603	8	1000000008
148.732	112.597	17.202	8	1000000006
117.496	159.739	20.1278	8	1000000014
156.836	160.645	23.4965	8	1000000009
113.39	132.501	31.0545	8	1000000018
186.051	96.1742	8.82435	8	1000000010
176.763	110.022	12.7065	8	1000000022
91.7916	202.205	9.17741	8	1000000013
112.46	197.704	10.5188	8	1000000012
84.7363	189.527	23.8445	8	1000000011
142.956	207.783	31.2484	8	1000000021
167.858	176.916	22.5861	8	1000000015
83.0983	70.9856	33.9329	8	1000000017
63.2055	119.398	33.1263	8	1000000016
108.928	200.704	34.932	8	1000000023
135.732	167.581	37.252	8	1000000019
29.6304	159.774	40.8706	8	1000000042
96.4561	64.7125	4.48001	9	1000000000
114.322	45.9658	20.4757	9	1000000003
109.564	8.94152	24.4686	9	1000000002
150.231	19.3619	25.6305	9	1000000001
62.3177	119.264	31.3085	9	1000000016
158.531	98.4799	1	9	1000000020
131.318	111.625	1	9	1000000005
125.717	100.11	12.281	9	1000000007
97.0956	153.534	13.7113	9	1000000008
83.8101	159.793	14.2947	9	1000000004
148.179	112.441	16.8168	9	1000000006
116.394	159.2	21.4362	9	1000000014
156.745	162.102	21.3156	9	1000000009
114.267	133.682	28.0186	9	1000000018
185.389	94.7079	8.54914	9	1000000010
176.099	110.524	10.6533	9	1000000022
113.435	196.374	10.8338	9	1000000012
91.8034	202.325	10.5951	9	1000000013
85.5023	189.622	25.3666	9	1000000011
143.393	207.783	30.93	9	1000000021
169.595	176.381	22.669	9	1000000015
80.6805	70.7213	34.5534	9	1000000017
136.732	165.728	36.9119	9	1000000019
107.577	199.17	37.5329	9	1000000023
160.409	207.783	43	9	1000000024
30.902	161.102	38.9474	9	1000000042
96.2028	65.0068	3.14793	10	1000000000
116.554	46.4554	22.6514	10	1000000003
109.97	8.78107	24.5416	10	1000000002
152.224	15.4674	26.077	10	1000000001
63.4571	119.514	30.6974	10	1000000016
130.664	111.829	1	10	1000000005
159.202	97.0918	3.09642	10	1000000020
127.489	98.9109	13.3745	10	1000000007
97.9822	155.258	12.5899	10	1000000008
85.5633	161.331	13.6856	10	1000000004
148.641	114.627	15.0228	10	1000000006
116.934	161.025	21.2675	10	1000000014
115.516	137.008	24.5017	10	1000000018
185.728	93.829	9.65557	10	1000000010
175.791	111.492	11.6703	10	1000000022
116.744	196.52	11.3612	10	1000000012
93.3868	201.187	10.6247	10	1000000013
157.004	163.715	20.4561	10	1000000009
87.7194	189.408	28.4162	10	1000000011
144.614	206.325	31.0664	10	1000000021
170.897	175.248	22.98	10	1000000015
79.8378	69.9762	34.9483	10	1000000017
138.045	165.479	37.4789	10	1000000019
107.171	199.966	37.6178	10	1000000023
161.123	207.783	43	10	1000000024
31.6904	160.789	34.9933	10	1000000042
97.1375	64.5269	4.25292	11	1000000000
111.44	10.6162	23.3557	11	1000000002
118.146	46.9772	24.4497	11	1000000003
152.122	15.1102	26.8412	11	1000000001
175.193	70.2387	14.5813	11	1000000025
67.1188	122.322	28.8754	11	1000000016
129.806	112.668	1	11	1000000005
158.468	97.3679	6.23162	11	1000000020
129.034	97.984	12.252	11	1000000007
99.0961	157.495	12.4458	11	1000000008
149.423	115.993	15.445	11	1000000006
85.6458	162.119	14.7806	11	1000000004
117.048	161.849	22.512	11	1000000014
116.849	141.063	24.3355	11	1000000018
185.757	94.8994	9.1624	11	1000000010
175.209	113.179	10.4241	11	1000000022
93.1678	201.36	10.6788	11	1000000013
119.144	198.538	12.9433	11	1000000012
156.414	166.098	17.6522	11	1000000009
91.4067	190.423	29.1655	11	1000000011
171.178	175.287	22.5595	11	1000000015
80.2672	70.9497	32.3739	11	1000000017
145.869	205.837	32.1198	11	1000000021
106.286	199.697	36.5522	11	1000000023
138.593	167.564	38.2665	11	1000000019
164.145	207.783	43	11	1000000024
32.5277	159.275	31.779	11	1000000042
96.4136	64.8381	4.70771	12	1000000000
109.048	10.0496	22.4281	12	1000000002
117.643	47.2511	24.3932	12	1000000003
152.841	13.7709	27.5949	12	1000000001
180.521	65.435	13.7434	12	1000000025
68.0466	121.009	27.0553	12	1000000016
128.298	113.514	1	12	1000000005
157.487	96.6155	7.69176	12	1000000020
99.6531	158.886	11.5552	12	1000000008
129.995	97.2662	13.4257	12	1000000007
85.137	162.447	13.0404	12	1000000004
150.21	116.53	14.4826	12	1000000006
118.189	145.54	22.7766	12	1000000018
96.0619	97.346	24.8574	12	1000000026
186.197	95.2401	8.74549	12	1000000010
175.121	114.84	9.79065	12	1000000022
93.5363	201.37	10.3735	12	1000000013
155.34	165.27	13.6758	12	1000000009
121.133	198.848	13.9546	12	1000000012
117.977	163	21.5861	12	1000000014
91.9352	189.807	28.5378	12	1000000011
146.774	204.486	31.7419	12	1000000021
172.708	174.743	21.8334	12	1000000015
83.8974	69.3757	32.8954	12	1000000017
105.119	198.884	34.9837	12	1000000023
141.037	165.813	37.9885	12	1000000019
160.374	190.288	41.4518	12	1000000027
165.282	207.783	43	12	1000000024
33.6634	159.137	29.4124	12	1000000042
95.4577	63.018	6.3712	13	1000000000
133.498	49.0985	12.7484	13	1000000028
109.816	11.3511	21.1299	13	1000000002
117.599	46.3346	24.5743	13	1000000003
152.68	14.4385	27.0842	13	1000000001
184.184	63.4037	12.9381	13	1000000025
69.1224	120.274	25.2537	13	1000000016
126.428	113.123	1	13	1000000005
158.242	96.235	7.33147	13	1000000020
131.007	96.4734	11.7617	13	1000000007
99.0418	158.957	11.0925	13	1000000029
84.2958	161.89	13.0594	13	1000000004
149.394	114.46	16.1617	13	1000000006
118.203	147.673	21.2945	13	1000000018
116.407	162.07	21.0599	13	1000000014
95.1483	98.0068	22.8887	13	1000000026
186.978	95.4656	7.84168	13	1000000010
175.017	114.462	9.12647	13	1000000022
181.236	117.767	13.1115	13	1000000030
94.487	199.922	9.00068	13	1000000013
153.292	164.546	11.5	13	1000000009
124.802	200.094	13.1012	13	1000000012
93.0836	188.651	29.2147	13	1000000011
173.666	175.478	23.1601	13	1000000015
85.1563	68.9814	33.2838	13	1000000017
148.744	202.604	32.6895	13	1000000021
142.06	163.056	37.1136	13	1000000019
103.637	196.492	36.265	13	1000000023
160.295	188.263	43	13	1000000027
172.218	179.117	41.641	13	1000000031
167.198	207.783	41.2168	13	1000000024
33.7941	159.032	28.9681	13	1000000042
94.9203	61.8697	6.10012	14	1000000000
134.073	49.2517	14.213	14	1000000028
109.997	11.3149	19.7954	14	1000000002
151.033	13.8792	25.8429	14	1000000001
117.53	45.7623	24.7193	14	1000000003
185.603	63.7632	13.5683	14	1000000025
69.8831	120.456	21.4027	14	1000000016
125.653	113.056	1	14	1000000005
158.043	95.8973	6.97129	14	1000000020
131.813	96.0147	9.72095	14	1000000007
99.4531	155.637	8.2002	14	1000000008
99.5937	162.012	11.7963	14	1000000029
84.4123	161.872	12.9452	14	1000000004
148.284	114.521	16.5844	14	1000000006
96.9207	98.7186	19.2723	14	1000000026
118.147	148.889	20.2549	14	1000000018
117.942	162.075	20.1059	14	1000000014
185.979	95.4657	6.88224	14	1000000010
173.62	114.719	8.36521	14	1000000022
178.847	119.614	11.2991	14	1000000030
96.9151	198.53	8.48704	14	1000000013
152.547	164.485	11.4759	14	1000000009
126.982	200.766	14.2696	14	1000000012
94.9935	189.099	29.3413	14	1000000011
150.462	202.333	31.8749	14	1000000021
173.668	176.625	23.4196	14	1000000015
88.0814	68.4888	33.6899	14	1000000017
140.77	161.483	36.7063	14	1000000019
104.522	197.59	35.0631	14	1000000023
162.387	187.937	41.2486	14	1000000027
172.393	178.989	38.1811	14	1000000031
168.176	207.783	43	14	1000000024
34.8574	158.963	28.2559	14	1000000042
94.9981	60.3257	7.32151	15	1000000000
136.263	50.3888	15.0772	15	1000000028
112.025	10.8437	19.5451	15	1000000002
151.32	13.3777	25.5166	15	1000000001
117.48	46.299	24.8405	15	1000000003
186.25	63.515	14.1861	15	1000000025
70.6622	120.431	18.4459	15	1000000016
123.48	113.574	1	15	1000000005
156.332	95.3548	7.70778	15	1000000020
98.2431	154.28	6.78023	15	1000000008
131.127	95.9409	9.03609	15	1000000007
85.4025	161.762	13.2482	15	1000000004
98.8033	99.0772	15.2814	15	1000000026
149.615	113.833	17.6679	15	1000000006
118.919	162.373	20.4889	15	1000000014
118.788	148.87	22.3107	15	1000000018
184.593	95.8869	6.03285	15	1000000010
173.179	115.502	7.13225	15	1000000022
176.804	127.258	11.0463	15	1000000030
99.4205	197.925	7.92721	15	1000000013
100.333	163.635	10.5008	15	1000000029
151.161	165.815	12.6255	15	1000000009
129.803	200.486	15.3471	15	1000000012
98.0958	187.767	29.3314	15	1000000011
153.499	201.825	31.7284	15	1000000021
172.673	176.412	23.6145	15	1000000015
87.889	68.818	32.6704	15	1000000017
140.075	158.714	37.7779	15	1000000019
104.37	197.539	34.0605	15	1000000023
162.213	187.128	40.6212	15	1000000027
172.464	177.548	37.3483	15	1000000031
167.592	207.783	40.4634	15	1000000024
36.7188	159.475	27.1958	15	1000000042
95.1062	59.8091	8.51531	16	1000000000
138.45	52.0294	13.422	16	1000000028
112.715	10.2112	18.8752	16	1000000002
118.348	46.8934	23.519	16	1000000003
152.888	12.5328	25.2258	16	1000000001
88.7761	68.8107	31.8813	16	1000000017
187.988	63.4751	14.2503	16	1000000025
71.2877	120.274	17.3273	16	1000000016
120.501	114.14	1	16	1000000005
97.6397	154.476	3.53124	16	1000000008
132.063	96.3323	8.65554	16	1000000007
154.905	96.5673	8.34727	16	1000000020
100.123	99.4538	15.0466	16	1000000026
86.8168	160.117	14.5876	16	1000000004
148.877	113.661	18.1408	16	1000000006
120.819	149.826	21.3872	16	1000000018
182.382	96.441	5.36284	16	1000000010
172.236	116.991	6.47971	16	1000000022
174.693	131.2	10.1599	16	1000000030
101.037	199.176	7.00222	16	1000000013
100.347	166.175	8.89873	16	1000000029
149.715	167.855	12.2853	16	1000000009
133.25	201.658	14.4052	16	1000000012
119.512	163.262	20.3394	16	1000000014
103.324	189.014	27.6226	16	1000000011
155.83	202.347	29.3171	16	1000000021
173.552	177.409	21.9426	16	1000000015
140.094	157.915	37.472	16	1000000019
107.113	197.422	32.643	16	1000000023
174.024	175.652	33.0982	16	1000000031
164.229	186.976	38.9422	16	1000000027
168.347	206.412	41.5138	16	1000000024
38.0987	159.455	26.0467	16	1000000042
94.3721	58.5755	8.66167	17	1000000000
137.778	51.1707	14.3789	17	1000000028
114.08	9.39471	20.4886	17	1000000002
118.369	45.1929	23.6647	17	1000000003
151.94	11.4899	26.407	17	1000000001
86.8797	70.2629	29.665	17	1000000017
189.204	62.5618	14.5078	17	1000000025
74.7708	119.232	19.8409	17	1000000016
119.418	115.07	1	17	1000000005
97.8799	154.519	2.31075	17	1000000008
134.697	97.0043	8.73205	17	1000000007
154.228	96.9791	8.81865	17	1000000020
101.237	98.6258	15.6209	17	1000000026
88.5033	159.448	15.6993	17	1000000004
149.439	112.369	20.1785	17	1000000006
124.901	148.994	20.8055	17	1000000018
183.025	96.6123	5.20007	17	1000000010
173.207	117.672	7.21713	17	1000000022
174.667	134.07	10.2895	17	1000000030
103.905	199.155	7.31046	17	1000000013
100.452	166.9	8.20445	17	1000000029
150.341	167.781	9.6408	17	1000000009
134.364	203.863	15.0571	17	1000000012
122.184	164.683	19.9857	17	1000000014
105.871	189.407	27.9963	17	1000000011
156.924	202.264	29.0742	17	1000000021
173.899	176.08	19.3217	17	1000000015
140.255	155.995	37.136	17	1000000019
107.721	198.689	33.2176	17	1000000023
175.57	173.997	33.7102	17	1000000031
165.85	186.038	36.2041	17	1000000027
168.214	204.771	43	17	1000000024
40.1543	158.649	25.1502	17	1000000042
93.8669	59.3072	8.77692	18	1000000000
137.215	52.443	14.6331	18	1000000028
115.394	9.30918	20.7101	18	1000000002
117.74	44.9057	24.4108	18	1000000003
153.303	10.8811	26.1697	18	1000000001
85.93	71.3886	26.7722	18	1000000017
189.702	61.7926	14.5992	18	1000000025
77.1153	119.27	19.3189	18	1000000016
118.557	116.02	1	18	1000000005
96.805	155.82	1	18	1000000008
135.34	96.3096	9.09091	18	1000000007
153.752	96.8021	8.59758	18	1000000020
102.383	98.3772	15.7937	18	1000000026
89.941	158.502	16.0954	18	1000000004
125.071	148.598	20.4791	18	1000000018
149.509	111.581	22.5659	18	1000000006
181.866	96.6007	5.00952	18	1000000010
174.906	118.497	7.80435	18	1000000022
175.049	137.153	10.2727	18	1000000030
105.889	200.091	7.95113	18	1000000013
100.501	169.111	8.20487	18	1000000029
150.438	168.775	9.28004	18	1000000009
136.114	204.834	17.1619	18	1000000012
122.849	166.518	20.6406	18	1000000014
158.914	201.79	28.5336	18	1000000021
107.776	189.223	30.5737	18	1000000011
173.407	173.979	19.14	18	1000000015
141.186	154.342	37.2039	18	1000000019
106.885	197.407	34.7674	18	1000000023
175.684	173.303	33.6464	18	1000000031
166.958	185.509	35.3795	18	1000000027
167.7	204.663	40.7167	18	1000000024
39.3649	158.076	24.5044	18	1000000042
95.4871	59.0673	11.1676	19	1000000000
140.123	54.6634	15.5993	19	1000000028
116.866	9.64278	21.6777	19	1000000002
121.802	45.6269	22.772	19	1000000003
156.195	12.3448	26.1482	19	1000000001
88.2536	72.8359	26.9134	19	1000000017
191.244	61.6988	15.8652	19	1000000025
120.359	116.593	1	19	1000000005
97.3513	156.547	4.56341	19	1000000008
154.432	96.2977	8.41154	19	1000000020
139.199	98.0367	9.86959	19	1000000007
105.919	101.003	13.7674	19	1000000026
93.1326	158.918	16.946	19	1000000004
81.9436	118.267	18.8365	19	1000000016
129.232	149.143	20.1532	19	1000000018
152.664	110.631	25.4674	19	1000000006
183.835	94.5336	6.43123	19	1000000010
176.532	118.992	7.69147	19	1000000022
175.995	138.417	11.2473	19	1000000030
101.339	170.162	9.38377	19	1000000029
108.45	199.001	8.16294	19	1000000013
150.775	169.482	11.3219	19	1000000009
139.69	206.356	17.2038	19	1000000012
125.299	167.891	21.361	19	1000000014
162.124	202.359	28.3785	19	1000000021
109.68	188.619	31.3947	19	1000000011
175.134	172.77	17.639	19	1000000015
143.156	154.196	37.3082	19	1000000019
108.975	197.221	34.6291	19	1000000023
142.763	207.783	34.7186	19	1000000032
175.983	172.46	32.831	19	1000000031
168.675	186.689	35.4725	19	1000000027
169.247	207.783	39.3486	19	1000000024
42.3814	156.541	27.2906	19	1000000042
95.8175	59.7793	11.2344	20	1000000000
142.518	56.2519	15.3422	20	1000000028
117.984	10.3345	21.481	20	1000000002
122.93	45.9716	22.0921	20	1000000003
158.665	12.7641	25.436	20	1000000001
89.3474	74.3959	24.3648	20	1000000017
192.052	63.6649	13.9812	20	1000000025
120.39	118.306	1	20	1000000005
154.528	96.7098	7.41011	20	1000000020
138.937	98.3075	8.61164	20	1000000007
106.589	104.473	11.0201	20	1000000026
92.7512	158.331	16.4494	20	1000000004
82.9286	118.81	18.4784	20	1000000016
129.396	149.55	18.4726	20	1000000018
153.215	111.581	27.8842	20	1000000006
186.799	93.7739	6.27698	20	1000000010
177.607	120.135	7.30204	20	1000000022
176.394	140.942	10.7943	20	1000000030
110.633	200.587	6.92963	20	1000000013
101.208	171.707	8.71025	20	1000000029
149.725	170.914	10.9043	20	1000000009
140.838	207.783	16.4159	20	1000000012
125.106	169.25	20.3929	20	1000000014
110.54	188.88	31.7831	20	1000000011
175.997	173.58	15.3409	20	1000000015
164.689	203.351	27.2615	20	1000000021
175.23	173.83	28.8655	20	1000000031
142.853	154.872	35.6561	20	1000000019
110.534	197.92	33.9508	20	1000000023
141.146	207.783	36.2018	20	1000000032
172.919	186.406	34.9468	20	1000000027
167.2	207.783	39.5446	20	1000000024
97.708	157.508	2.63982	20	1000000008
43.0004	156.873	27.2312	20	1000000042
95.0259	61.584	11.1332	21	1000000000
144.451	57.6153	14.8638	21	1000000028
126.671	48.8993	18.7332	21	1000000003
118.439	11.2436	21.6339	21	1000000002
161.267	10.3945	24.2789	21	1000000001
89.1936	75.3574	24.1508	21	1000000017
193.197	64.8546	15.0245	21	1000000025
120.805	119.836	1	21	1000000005
155.452	98.1604	7.13309	21	1000000020
139.09	98.3175	8.37801	21	1000000007
106.645	107.724	10.2309	21	1000000033
130.738	150.669	17.3663	21	1000000018
93.7601	158.575	16.0744	21	1000000004
83.3878	118.628	18.6876	21	1000000016
152.973	112.843	27.668	21	1000000006
188.736	94.3767	5.43955	21	1000000010
178.19	122.053	7.58155	21	1000000022
178.535	143.462	9.67986	21	1000000030
167.802	91.5694	10.824	21	1000000034
112.774	201.53	6.62006	21	1000000013
102.769	173.632	8.22607	21	1000000029
148.561	170.635	13.0782	21	1000000009
141.768	207.783	15.9659	21	1000000012
126.249	170.442	22.1245	21	1000000014
112.239	189.351	29.5343	21	1000000011
176.648	174.666	16.5669	21	1000000015
175.309	173.383	25.9801	21	1000000031
166.602	204.797	25.4949	21	1000000021
142.752	153.731	34.6437	21	1000000019
111.091	197.698	33.3328	21	1000000023
143.567	207.783	36.591	21	1000000032
173.727	185.382	33.0611	21	1000000027
165.029	204.841	39.2447	21	1000000024
98.0219	158.781	1.22246	21	1000000008
44.3458	157.397	25.6136	21	1000000042
94.0951	61.7754	10.1485	22	1000000000
144.31	58.3539	15.0306	22	1000000028
127.636	48.076	17.2642	22	1000000003
119.718	10.9793	20.7258	22	1000000002
89.7619	75.9377	20.9319	22	1000000017
162.031	10.5995	23.4388	22	1000000001
193.515	64.9713	15.0847	22	1000000025
120.317	121.856	1	22	1000000005
100.394	158.412	3.33879	22	1000000008
139.205	97.4178	7.26658	22	1000000007
155.705	98.359	6.84126	22	1000000020
107.224	107.285	10.497	22	1000000033
96.3191	157.262	15.2106	22	1000000004
84.2316	117.172	18.1636	22	1000000016
130.912	150.387	18.8156	22	1000000018
151.364	111.683	29.2015	22	1000000006
189.265	94.6149	5.37662	22	1000000010
177.924	122.95	6.5146	22	1000000022
179.547	144.899	9.03789	22	1000000030
172.891	94.063	12.3162	22	1000000034
104.727	173.799	7.27442	22	1000000029
114.809	202.664	6.55778	22	1000000013
149.248	170.148	13.5532	22	1000000009
141.372	207.783	16.9267	22	1000000012
128.167	169.916	23.5348	22	1000000014
113.786	189.842	28.7596	22	1000000011
177.059	173.849	15.2292	22	1000000015
168.574	203.451	25.4169	22	1000000021
175.414	172.161	26.8957	22	1000000031
142.803	152.111	34.2221	22	1000000019
110.983	197.042	32.743	22	1000000023
144.413	207.783	35.4428	22	1000000032
173.807	185.411	32.2108	22	1000000027
165.516	203.868	39.2005	22	1000000024
44.958	157.435	25.2848	22	1000000042
94.2236	61.4987	10.8028	23	1000000000
144.67	58.805	13.7856	23	1000000028
128.11	47.9549	16.0518	23	1000000003
120.363	10.5474	19.3562	23	1000000002
90.1799	75.6173	19.7237	23	1000000017
160.181	12.4624	24.3651	23	1000000001
193.731	63.2294	14.03	23	1000000025
120.183	122.44	1	23	1000000005
101.81	158.462	1	23	1000000008
138.342	96.0896	4.59657	23	1000000007
155.348	97.2749	6.25457	23	1000000020
103.831	103.297	8.55071	23	1000000026
109.484	110.303	10.1177	23	1000000033
97.1545	156.238	15.1598	23	1000000004
131.568	150.063	17.4663	23	1000000018
84.863	117.148	18.2951	23	1000000016
150.408	110.241	27.4897	23	1000000006
189.468	95.0869	5.60521	23	1000000010
178.342	124.263	5.07435	23	1000000022
181.143	146.338	8.68486	23	1000000030
170.085	93.4266	10.6204	23	1000000034
106.548	175.342	5.42622	23	1000000029
116.618	203.435	5.7382	23	1000000013
148.801	170.531	13.0441	23	1000000009
140.716	207.783	17.4105	23	1000000012
128.47	170.565	24.1877	23	1000000014
115.428	189.117	27.2773	23	1000000011
178.759	172.78	13.6211	23	1000000015
175.891	171.419	23.0491	23	1000000031
170.987	204.009	24.0484	23	1000000021
174.309	184.912	30.1659	23	1000000027
144.269	151.476	33.4041	23	1000000019
110.988	195.769	33.0592	23	1000000023
145.528	207.783	34.9348	23	1000000032
166.366	202.466	38.798	23	1000000024
46.0414	154.85	25.219	23	1000000042
94.5499	61.2702	12.1231	24	1000000000
128.677	48.388	14.3195	24	1000000003
144.338	59.6216	14.7187	24	1000000028
121.197	10.2499	17.5617	24	1000000002
90.6756	75.1172	17.3162	24	1000000017
159.182	13.3081	22.2675	24	1000000001
195.486	60.9287	13.3427	24	1000000025
119.665	125.069	1	24	1000000005
102.048	159.504	1	24	1000000008
139.417	96.7094	3.03621	24	1000000007
156.124	97.7421	5.15709	24	1000000020
101.229	102.463	8.45757	24	1000000026
110.312	111.394	9.08597	24	1000000033
98.2317	155.386	14.4889	24	1000000004
85.0179	116.962	17.8937	24	1000000016
132.788	149.898	16.4122	24	1000000018
151.344	109.996	26.8541	24	1000000006
190.867	95.0834	5.18193	24	1000000010
178.671	126.877	6.81978	24	1000000022
170.109	93.5043	9.11068	24	1000000034
182.309	147.263	9.00965	24	1000000030
110.622	176.704	4.15905	24	1000000029
118.066	203.341	5.60133	24	1000000013
149.461	171.11	12.6967	24	1000000009
142.75	207.783	17.6053	24	1000000012
128.631	170.845	26.0975	24	1000000014
115.31	189.407	28.1584	24	1000000011
147.874	207.783	31.859	24	1000000032
180.501	172.805	11.1895	24	1000000015
176.898	171.236	21.0262	24	1000000031
173.113	203.751	23.2544	24	1000000021
174.779	184.845	27.947	24	1000000027
142.73	149.595	34.5894	24	1000000019
110.593	196.035	35.2041	24	1000000023
166.908	200.669	36.9586	24	1000000024
46.7299	154.523	25.5454	24	1000000042
45.7988	50.0939	28.4903	25	1000000035
128.304	46.955	13.395	25	1000000003
144.03	59.2142	15.3436	25	1000000028
94.3293	60.7881	16.4347	25	1000000000
91.0306	74.6287	16.2639	25	1000000017
122.8	9.5282	18.5777	25	1000000002
159.6	13.0476	21.1051	25	1000000001
195.59	59.2051	12.4648	25	1000000025
119.903	127.333	1	25	1000000005
101.413	159.262	1	25	1000000008
140.162	95.9844	2.63054	25	1000000007
155.954	97.5504	5.36447	25	1000000020
99.1309	102.899	7.79127	25	1000000026
109.31	111.968	7.77833	25	1000000033
134.649	150.394	15.7407	25	1000000018
98.3342	155.454	14.5115	25	1000000004
84.2135	116.753	16.9914	25	1000000016
149.718	109.033	24.3203	25	1000000006
192.224	95.0633	5.04141	25	1000000010
170.427	94.0313	7.91173	25	1000000034
179.589	125.735	6.98733	25	1000000022
183.028	146.424	8.73911	25	1000000030
112.734	177.463	3.92599	25	1000000029
119.002	203.174	5.87936	25	1000000013
148.905	171.025	11.0235	25	1000000009
141.401	207.783	17.515	25	1000000012
128.39	169.984	27.6396	25	1000000014
116.453	190.431	26.9214	25	1000000011
147.691	207.783	29.425	25	1000000032
183.084	170.914	9.72465	25	1000000015
177.251	171.565	19.5767	25	1000000031
174.56	185.763	24.9807	25	1000000027
174.631	202.755	24.5804	25	1000000021
141.473	148.153	33.5389	25	1000000019
108.322	196.403	34.6904	25	1000000023
168.147	197.845	35.4342	25	1000000024
45.3006	153.249	25.4835	25	1000000042
47.3807	49.7832	26.9171	26	1000000035
129.226	46.1954	12.2484	26	1000000003
143.369	59.8216	15.0559	26	1000000028
90.2158	74.7978	14.5297	26	1000000017
123.536	8.08239	19.015	26	1000000002
159.894	12.1582	20.5219	26	1000000001
93.3121	60.2147	21.4268	26	1000000000
194.924	57.29	11.462	26	1000000025
139.801	95.6166	1	26	1000000007
119.664	128.373	1	26	1000000005
100.814	161.136	1	26	1000000008
156.006	98.1143	6.9981	26	1000000020
97.596	103.812	7.04309	26	1000000026
108.53	111.311	7.211	26	1000000033
135.367	149.903	15.4148	26	1000000018
98.4507	155.034	15.1052	26	1000000004
84.4433	116.233	17.2826	26	1000000016
149.625	109.919	22.8453	26	1000000006
142.107	148.454	30.8365	26	1000000019
191.191	94.5076	3.39143	26	1000000010
169.097	93.4946	7.07681	26	1000000034
179.73	125.176	6.86707	26	1000000022
184.73	145.187	10.1531	26	1000000030
122.126	204.324	5.18361	26	1000000013
113.777	179.088	6.63532	26	1000000029
147.826	170.758	11.0096	26	1000000009
141.432	207.783	17.2515	26	1000000012
129.44	169.812	27.574	26	1000000014
117.489	190.186	26.6169	26	1000000011
148.171	207.783	26.8174	26	1000000032
185.945	167.993	7.44366	26	1000000015
175.801	170.118	17.6618	26	1000000031
174.505	185.367	22.3081	26	1000000027
175.525	201.186	24.2726	26	1000000021
108.689	197.49	35.447	26	1000000023
168.427	194.785	34.9144	26	1000000024
45.846	151.522	24.5033	26	1000000042
49.3445	47.9669	26.3221	27	1000000035
130.024	45.0004	12.5635	27	1000000003
90.3022	74.7806	13.5404	27	1000000017
143.538	60.7876	15.0154	27	1000000028
124.132	8.30761	19.8304	27	1000000002
159.924	10.6783	20.5461	27	1000000001
92.0098	60.8376	22.917	27	1000000000
195.249	55.2446	10.8529	27	1000000025
139.9	93.7724	1	27	1000000007
118.31	128.364	1	27	1000000005
100.975	161.364	1	27	1000000008
109.224	111.255	5.0502	27	1000000033
155.797	96.7742	6.64063	27	1000000020
96.3022	103.918	6.66965	27	1000000026
137.2	149.393	15.6728	27	1000000018
98.3097	154.313	14.9757	27	1000000004
84.1528	114.67	16.8309	27	1000000016
150.999	110.073	21.196	27	1000000006
141.033	148.609	28.7397	27	1000000019
189.763	93.1785	5.38077	27	1000000010
168.366	92.8002	6.407	27	1000000034
179.247	125.591	6.28546	27	1000000022
185.757	144.646	12.3754	27	1000000030
115.698	180.173	7.27205	27	1000000029
124.605	205.024	6.17853	27	1000000013
147.845	171.309	11.6291	27	1000000009
138.123	205.44	19.3161	27	1000000012
148.75	207.783	24.8198	27	1000000032
127.685	168.692	27.5758	27	1000000014
117.196	190.069	27.2801	27	1000000011
187.14	166.057	7.52683	27	1000000015
174.127	165.631	17.8479	27	1000000031
174.555	185.64	19.2563	27	1000000027
177.28	201.799	24.9742	27	1000000021
107.679	199.234	34.5157	27	1000000023
169.036	193.257	34.3475	27	1000000024
47.9575	151.149	23.0346	27	1000000042
50.9061	47.5208	26.2371	28	1000000035
130.955	44.4725	13.6734	28	1000000003
91.1962	74.6925	12.6548	28	1000000017
143.328	58.5929	16.5464	28	1000000028
125.926	7.21545	20.1161	28	1000000002
161.683	8.04209	21.9314	28	1000000001
91.9987	60.2688	23.8078	28	1000000000
195.703	55.263	10.9928	28	1000000025
141.192	92.9905	1	28	1000000007
119.693	129.086	1	28	1000000005
99.5465	162.777	1	28	1000000008
110.797	112.157	2.96301	28	1000000033
97.9172	104.287	5.64199	28	1000000026
156.185	96.8812	7.05561	28	1000000020
139.137	149.221	15.1429	28	1000000018
99.388	153.328	15.5361	28	1000000004
84.8771	114.683	16.6328	28	1000000016
151.39	109.77	21.3591	28	1000000006
144.429	146.772	28.805	28	1000000019
191.702	91.9097	4.996	28	1000000010
169.085	94.0477	5.16841	28	1000000034
179.005	126.362	6.37017	28	1000000022
187.686	142.921	14.3375	28	1000000030
127.063	204.986	5.76413	28	1000000013
116.438	179.246	9.48854	28	1000000029
148.974	172.55	13.0531	28	1000000009
137.147	201.557	20.5633	28	1000000012
150.433	207.783	22.9772	28	1000000032
120.182	189.869	28.8062	28	1000000011
126.237	167.716	30.3877	28	1000000014
188.911	164.445	7.71286	28	1000000015
174.587	163.236	15.9835	28	1000000031
175.826	185.9	17.4827	28	1000000027
179.511	201.351	25.5564	28	1000000021
107.976	199.157	33.7492	28	1000000023
171.252	190.945	32.7158	28	1000000024
49.7133	150.593	23.131	28	1000000042
0.318199	202.932	10.1811	28	1000000043
51.2563	47.1983	25.6994	29	1000000035
91.8763	75.6083	12.1284	29	1000000017
131.828	44.1689	14.0827	29	1000000003
142.674	59.5171	16.4847	29	1000000028
162.112	6.06218	20.5663	29	1000000001
125.072	7.24982	21.0439	29	1000000002
93.01	60.5076	24.0316	29	1000000000
195.003	56.2493	10.2732	29	1000000025
142.155	92.1407	1	29	1000000007
110.956	113.786	1	29	1000000033
121.374	129	1	29	1000000005
101.038	162.773	1	29	1000000008
157.075	97.4919	6.54849	29	1000000020
99.4936	103.745	6.44124	29	1000000026
86.2491	114.049	15.6993	29	1000000016
141.011	149.456	14.6431	29	1000000018
100.196	153.428	16.044	29	1000000004
151.021	109.924	21.5385	29	1000000006
170.46	95.5879	2.27711	29	1000000034
192.777	91.8105	4.63585	29	1000000010
178.541	127.921	5.10436	29	1000000022
174.317	161.712	13.7734	29	1000000031
187.935	141.507	14.3901	29	1000000030
130.224	206.891	6.76817	29	1000000013
117.772	179.419	9.25957	29	1000000029
150.242	174.666	14.1551	29	1000000009
138.137	200.901	21.2841	29	1000000012
151.35	207.783	22.454	29	1000000032
121.664	190.684	28.8246	29	1000000011
125.381	168.411	30.592	29	1000000014
190.92	163.98	8.3626	29	1000000015
175.861	186.895	15.2622	29	1000000027
181.709	200.51	24.91	29	1000000021
172.555	191.833	31.9514	29	1000000024
107.696	200.274	32.9547	29	1000000023
146.053	145.417	25.3923	29	1000000019
51.7477	150.42	22.5281	29	1000000042
0.318199	202.765	9.05211	29	1000000043
52.2538	46.2647	26.6378	30	1000000035
93.3488	76.4129	11.472	30	1000000017
133.629	44.1009	13.371	30	1000000003
143.843	58.9428	15.6772	30	1000000028
161.793	4.48351	21.0211	30	1000000001
123.809	6.98717	22.3252	30	1000000002
94.9221	60.4357	23.8755	30	1000000000
195.755	57.159	9.95195	30	1000000025
142.039	92.5529	1	30	1000000007
111.553	113.779	1	30	1000000033
123.253	129.965	1	30	1000000005
99.8186	104.88	5.79941	30	1000000026
157.098	97.491	6.26894	30	1000000020
144.906	149.692	12.9831	30	1000000018
101.513	153.776	15.0747	30	1000000004
86.0976	113.106	17.5037	30	1000000016
150.043	110.4	21.3856	30	1000000006
146.806	142.784	27.3639	30	1000000019
171.073	96.1086	2.40043	30	1000000034
193.787	91.2233	4.35293	30	1000000010
180.685	128.939	5.37381	30	1000000022
189.352	139.796	13.2057	30	1000000030
174.143	161.694	12.6862	30	1000000031
100.194	165.68	1	30	1000000008
131.197	207.783	7.33062	30	1000000013
118.139	180.415	10.8713	30	1000000029
151.18	176.721	16.7713	30	1000000009
139.734	198.638	21.7113	30	1000000012
153.687	207.783	21.04	30	1000000032
122.281	189.05	27.525	30	1000000011
123.134	168.102	32.2409	30	1000000014
191.037	163.058	7.50177	30	1000000015
176.859	186.654	15.5316	30	1000000027
185.988	199.192	25.3831	30	1000000021
175.244	189.189	30.8348	30	1000000024
106.582	200.018	32.1431	30	1000000023
52.9869	148.814	22.1299	30	1000000042
2.11969	201.84	7.71435	30	1000000043
50.9662	47.2207	27.0755	31	1000000035
94.1013	75.8969	11.0864	31	1000000017
134.707	44.2465	12.6593	31	1000000003
143.406	59.8078	16.3275	31	1000000028
122.635	6.66937	21.8486	31	1000000002
94.2858	60.1534	27.1387	31	1000000000
195.611	58.5713	9.68088	31	1000000025
162.987	4.02051	21.5896	31	1000000001
142.681	92.0434	1	31	1000000007
111.617	113.649	1	31	1000000033
126.088	129.727	1	31	1000000005
158.993	96.4515	7.69506	31	1000000020
100.815	104.883	7.18471	31	1000000026
146.445	148.851	10.8877	31	1000000018
102.022	153.026	16.1554	31	1000000004
86.8884	113.205	19.0817	31	1000000016
149.3	109.51	20.8169	31	1000000006
148.267	140.111	27.1842	31	1000000019
172.21	96.9519	1	31	1000000034
180.38	129.619	3.18797	31	1000000022
193.879	91.2935	4.4137	31	1000000010
191.95	162.043	7.2358	31	1000000015
174.647	161.2	11.5501	31	1000000031
189.436	138.93	12.8495	31	1000000030
100.513	167.157	1	31	1000000008
133.42	207.783	7.87715	31	1000000013
118.739	180.469	9.61564	31	1000000029
152.704	179.267	19.1606	31	1000000009
140.657	197.708	21.223	31	1000000012
155.102	207.783	20.2515	31	1000000032
123.151	189.731	27.4746	31	1000000011
180.263	186.743	15.4037	31	1000000027
188.472	198.387	23.4871	31	1000000021
177.462	189.162	31.0056	31	1000000024
121.008	167.973	32.2179	31	1000000014
107.455	201.611	33.8831	31	1000000023
55.8566	146.816	24.4176	31	1000000042
3.50986	202.263	7.2365	31	1000000043
53.6899	45.4651	28.715	32	1000000035
136.974	43.0156	11.7577	32	1000000003
95.8319	75.2865	10.218	32	1000000017
145.845	59.7101	16.0534	32	1000000028
122.152	6.88277	23.0229	32	1000000002
94.5843	59.7136	28.162	32	1000000000
196.602	60.3611	10.402	32	1000000025
165.413	2.98422	23.1289	32	1000000001
143.367	91.2212	1	32	1000000007
112.524	113.406	1	32	1000000033
128.149	130.392	1	32	1000000005
160.426	95.5623	8.66087	32	1000000020
101.744	104.564	8.25461	32	1000000026
147.962	148.697	10.3824	32	1000000018
103.518	152.808	15.635	32	1000000004
150.282	109.144	21.5749	32	1000000006
87.7239	114.088	20.5902	32	1000000016
149.138	139.209	26.9464	32	1000000019
173.865	97.301	1	32	1000000034
181.235	128.927	2.37482	32	1000000022
196.027	90.0151	6.50699	32	1000000010
193.049	161.127	6.42299	32	1000000015
176.374	159.842	9.66257	32	1000000031
190.773	137.861	12.381	32	1000000030
135.512	207.783	8.45152	32	1000000013
121.27	181.171	11.3116	32	1000000029
154.343	180.042	21.7356	32	1000000009
141.539	196.511	21.8227	32	1000000012
157.686	207.284	20.4791	32	1000000032
123.842	189.567	28.8129	32	1000000011
122.29	168.539	31.5631	32	1000000014
180.795	184.143	13.6516	32	1000000027
189.812	197.823	21.5559	32	1000000021
179.725	187.55	31.4372	32	1000000024
107.681	201.118	34.9211	32	1000000023
101.663	165.782	1.6754	32	1000000008
56.6629	144.794	26.2453	32	1000000042
8.21325	202.055	8.71149	32	1000000043
53.3012	44.4218	28.3084	33	1000000035
97.058	76.028	9.17229	33	1000000017
138.284	43.0748	11.4418	33	1000000003
147.62	60.1729	17.4453	33	1000000028
120.21	8.65932	23.1412	33	1000000002
94.9613	58.7544	27.5228	33	1000000000
197.141	60.755	10.2288	33	1000000025
167.032	3.18679	24.1148	33	1000000001
145.274	91.3694	1	33	1000000007
114.737	113.887	1	33	1000000033
128.886	132.23	1	33	1000000005
161.426	95.1956	8.43078	33	1000000020
103.672	105.376	10.6673	33	1000000026
151.056	149.012	10.2643	33	1000000018
104.097	152.288	18.4732	33	1000000004
148.951	109.124	20.8112	33	1000000006
88.2456	115.051	23.2971	33	1000000016
149.79	138.108	28.6984	33	1000000019
175.154	98.3802	1	33	1000000034
182.547	129.412	1	33	1000000022
197.263	89.953	7.90279	33	1000000010
194.728	160.094	7.97256	33	1000000015
179.328	158.711	9.32177	33	1000000031
193.757	136.314	11.4478	33	1000000030
101.335	167.428	1	33	1000000008
137.23	207.783	8.30941	33	1000000013
123.04	180.969	15.167	33	1000000029
159.149	205.791	20.6121	33	1000000032
154.89	179.47	22.7857	33	1000000009
141.961	194.983	22.2755	33	1000000012
124.66	187.231	29.766	33	1000000011
121.143	169.782	31.038	33	1000000014
182.343	183.512	13.4783	33	1000000027
190.709	198.873	20.2716	33	1000000021
180.861	186.666	30.9884	33	1000000024
108.37	199.575	34.9828	33	1000000023
57.1541	143.863	27.1292	33	1000000042
11.0739	201.663	10.826	33	1000000043
53.4056	43.6966	28.7122	34	1000000035
99.2357	75.3415	9.82246	34	1000000017
138.72	41.896	12.4465	34	1000000003
148.169	59.0395	18.2582	34	1000000028
120.181	7.80081	21.7357	34	1000000002
95.7951	57.3373	27.0358	34	1000000000
197.446	61.7197	10.85	34	1000000025
168.044	3.50831	23.6496	34	1000000001
144.884	90.0934	1	34	1000000007
129.238	132.836	1	34	1000000005
115.305	113.443	2.10406	34	1000000033
162.863	94.1571	8.33247	34	1000000020
104.788	104.209	11.4751	34	1000000026
154.327	147.678	10.1641	34	1000000018
103.128	151.143	18.9004	34	1000000004
148.755	107.272	20.5165	34	1000000006
88.7055	116.323	23.4972	34	1000000016
150.719	138.227	29.1952	34	1000000019
175.091	97.2534	1	34	1000000034
182.668	129.668	2.59225	34	1000000022
194.802	159.595	7.59643	34	1000000015
197.443	90.2455	8.69398	34	1000000010
179.289	156.952	9.73076	34	1000000031
193.762	135.353	13.0068	34	1000000030
103.512	166.306	1	34	1000000008
138.165	207.783	8.25025	34	1000000013
125.312	180.718	15.1944	34	1000000029
143.028	192.733	21.2676	34	1000000012
156.755	179.18	23.5449	34	1000000009
159.597	204.929	22.0862	34	1000000032
125.051	186.954	29.4142	34	1000000011
121.495	169.609	31.0836	34	1000000014
183.573	183.369	12.9034	34	1000000027
191.525	200.634	19.1629	34	1000000021
181.048	187.006	31.6268	34	1000000024
109.11	199.972	35.2246	34	1000000023
57.7835	142.745	28.9754	34	1000000042
15.876	201.331	12.1519	34	1000000043
52.8855	44.2175	28.5337	35	1000000035
99.6158	75.0116	8.6075	35	1000000017
139.519	41.9298	11.9599	35	1000000003
147.443	57.8733	17.4547	35	1000000028
118.595	8.29152	22.2307	35	1000000002
94.7566	57.2161	27.1812	35	1000000000
196.505	60.7988	12.6979	35	1000000025
168.99	4.50821	22.584	35	1000000001
146.003	89.9344	1	35	1000000007
115.902	112.422	1	35	1000000033
128.982	132.69	1	35	1000000005
155.669	147.417	9.36471	35	1000000018
104.565	103.977	11.742	35	1000000026
147.443	106.843	21.8166	35	1000000006
102.843	152.695	20.3358	35	1000000004
87.5667	118.796	25.1726	35	1000000016
150.876	138.159	29.2736	35	1000000019
182.269	130.942	3.11547	35	1000000022
194.795	159.886	7.6225	35	1000000015
198.299	88.7618	9.80374	35	1000000010
162.942	93.9454	8.15859	35	1000000020
178.99	156.811	10.2718	35	1000000031
192.745	135.478	13.8202	35	1000000030
105.417	168.527	1	35	1000000008
139.296	207.783	8.45549	35	1000000013
127.84	179.886	17.3822	35	1000000029
144.076	193.112	21.721	35	1000000012
160.079	203.453	23.0298	35	1000000032
156.666	179.26	24.3182	35	1000000009
125.715	187.9	28.5011	35	1000000011
120.136	170.293	31.242	35	1000000014
182.779	182.117	13.4608	35	1000000027
191.068	201.123	16.9022	35	1000000021
181.403	187.965	30.9026	35	1000000024
111.124	200.159	33.6848	35	1000000023
175.655	97.8067	1	35	1000000034
57.4843	140.132	30.5926	35	1000000042
20.5696	201.485	13.6462	35	1000000043
52.7417	45.1136	26.818	36	1000000035
97.1634	76.7219	7.08066	36	1000000017
101.483	75.5556	9.9449	36	1000000036
139.819	40.8712	12.7218	36	1000000003
146.701	58.9834	16.6745	36	1000000028
118.317	8.01783	21.2153	36	1000000002
95.5249	56.119	26.1012	36	1000000000
195.656	61.4966	13.6252	36	1000000025
169.817	4.73066	22.5378	36	1000000001
145.95	89.6619	1	36	1000000007
116.731	112.817	1	36	1000000033
128.299	133.42	1	36	1000000005
162.317	94.2434	8.34713	36	1000000020
157.28	145.202	8.92161	36	1000000018
104.951	104.148	11.7559	36	1000000026
102.413	153.633	21.657	36	1000000004
146.5	106.514	22.8614	36	1000000006
87.565	119.699	27.2036	36	1000000016
151.304	136.945	31.2563	36	1000000019
175.46	102.683	1	36	1000000034
180.671	131.722	2.54039	36	1000000022
195.568	160.044	7.67706	36	1000000015
199.221	89.3144	10.2713	36	1000000010
178.405	156.395	10.298	36	1000000031
191.541	135.063	14.5946	36	1000000030
106.684	170.304	1	36	1000000008
138.927	207.783	9.33307	36	1000000013
129.134	179.553	17.1598	36	1000000029
144.297	193.221	21.2688	36	1000000012
161.628	201.724	22.7254	36	1000000032
156.671	177.78	24.1704	36	1000000009
126.454	189.279	26.6755	36	1000000011
119.553	170.652	31.3295	36	1000000014
112.911	200.168	31.3	36	1000000023
181.974	180.876	14.4961	36	1000000027
190.117	201.091	18.6822	36	1000000021
181.887	187.115	31.4663	36	1000000024
58.1003	139.304	31.4822	36	1000000042
22.1977	201.833	13.7738	36	1000000043
52.1237	44.9265	25.5156	37	1000000035
94.9251	76.6038	5.13351	37	1000000017
140.655	40.196	13.6353	37	1000000003
100.364	73.1732	13.1566	37	1000000036
146.021	58.5057	15.5766	37	1000000028
117.739	8.73809	19.7398	37	1000000002
95.8324	55.7656	24.5175	37	1000000000
194.426	62.376	13.2777	37	1000000025
173.902	8.54721	20.81	37	1000000001
145.845	88.3856	1	37	1000000007
117.768	111.749	1	37	1000000033
127.352	133.551	1	37	1000000005
161.805	94.0207	7.21641	37	1000000020
158.941	143.947	7.41771	37	1000000018
105.481	105.117	10.6519	37	1000000026
146.105	106.814	22.3334	37	1000000006
102.828	155.862	22.1153	37	1000000004
86.3288	119.474	27.0644	37	1000000016
152.118	136.407	30.9729	37	1000000019
174.473	104.677	1	37	1000000034
180.485	131.532	1	37	1000000022
199.085	88.7289	9.69177	37	1000000010
196.106	159.034	8.56214	37	1000000015
177.503	155.004	10.0546	37	1000000031
190.802	134.398	15.1041	37	1000000030
107.864	174.142	1	37	1000000008
141.101	207.783	9.37304	37	1000000013
132.821	179.586	18.0842	37	1000000029
144.208	192.96	19.6962	37	1000000012
162.81	200.38	22.7226	37	1000000032
157.914	178.041	25.2032	37	1000000009
124.824	188.734	24.8598	37	1000000011
112.38	198.891	29.9716	37	1000000023
118.89	171.757	31.6611	37	1000000014
181.854	179.851	14.7385	37	1000000027
189.369	201.817	18.6676	37	1000000021
181.762	187.949	30.3126	37	1000000024
57.865	137.265	29.2916	37	1000000042
24.2409	200.447	13.5673	37	1000000043
52.1457	44.1329	24.6933	38	1000000035
94.4348	77.5484	2.10911	38	1000000017
140.787	40.2178	13.8503	38	1000000003
99.6739	71.4417	13.2898	38	1000000036
116.632	9.88381	18.5186	38	1000000002
144.278	57.7228	18.8004	38	1000000028
96.4764	55.7281	22.3113	38	1000000000
193.424	62.6083	13.3613	38	1000000025
174.422	9.2185	21.2465	38	1000000001
145.696	87.839	1	38	1000000007
117.356	112.75	1	38	1000000033
126.932	135.198	1	38	1000000005
160.996	95.1799	7.40217	38	1000000020
105.352	105.623	9.49765	38	1000000026
160.265	143.687	8.13119	38	1000000018
144.419	107.848	22.8827	38	1000000006
102.434	155.385	22.4345	38	1000000004
86.5792	120.559	29.6141	38	1000000016
174.488	107.088	1	38	1000000034
180.307	130.8	2.73749	38	1000000022
177.375	154.809	9.3921	38	1000000031
196.4	158.856	8.7643	38	1000000015
198.764	90.3399	10.4481	38	1000000010
190.454	133.288	14.8601	38	1000000030
109.475	179.369	6.02727	38	1000000008
142.748	207.783	9.23161	38	1000000013
137.309	179.589	18.8851	38	1000000029
143.929	194.119	18.8311	38	1000000012
125.572	188.823	23.1271	38	1000000011
158.379	175.987	26.7465	38	1000000009
113.786	198.043	28.8529	38	1000000023
182.778	179.224	15.2261	38	1000000027
189.124	203.229	18.0622	38	1000000021
164.189	200.442	23.3694	38	1000000032
182.633	189.792	28.8344	38	1000000024
154.265	134.717	33.1728	38	1000000019
120.948	173.053	32.2848	38	1000000014
58.1135	136.616	27.7528	38	1000000042
25.3698	200.115	13.65	38	1000000043
53.2966	44.771	23.5948	39	1000000035
94.0815	78.7727	1	39	1000000017
140.889	40.612	13.6256	39	1000000003
98.5842	71.1929	12.6406	39	1000000036
117.027	9.27881	17.8938	39	1000000002
143.523	58.0356	19.2573	39	1000000028
96.8892	55.3497	20.5815	39	1000000000
194.041	63.3281	13.2802	39	1000000025
176.637	10.2138	21.4434	39	1000000001
146.026	88.671	1	39	1000000007
117.206	111.459	1	39	1000000033
127.944	136.069	1	39	1000000005
161.8	143.985	6.87073	39	1000000018
160.618	96.288	8.01708	39	1000000020
103.903	107.923	10.1521	39	1000000026
145.228	108.828	21.1933	39	1000000006
103.261	156.33	22.4583	39	1000000004
86.7929	119.189	28.8851	39	1000000016
175.264	108.8	1	39	1000000034
180.213	133.131	2.09897	39	1000000022
177.371	154.306	9.27723	39	1000000031
197.133	158.911	8.87655	39	1000000015
199.114	90.7974	10.735	39	1000000010
190.145	132.714	14.9327	39	1000000030
109.501	181.148	8.04314	39	1000000008
143.952	207.783	9.72737	39	1000000013
140.537	179.008	18.9857	39	1000000029
143.952	194.776	19.4015	39	1000000012
126.232	189.809	21.836	39	1000000011
158.633	176.417	26.3725	39	1000000009
113.752	196.883	28.3227	39	1000000023
123.811	173.179	30.9445	39	1000000014
183.741	178.815	15.8263	39	1000000027
190.772	205.441	18.5296	39	1000000021
165.365	201.992	24.2855	39	1000000032
183.67	192.309	28.1572	39	1000000024
155.832	132.821	34.6767	39	1000000019
58.9921	134.45	26.5669	39	1000000042
27.3263	200.266	13.9679	39	1000000043
54.1351	44.9424	22.2371	40	1000000035
94.1616	80.5005	1	40	1000000017
140.649	41.6922	13.0835	40	1000000003
98.7594	72.3217	12.1504	40	1000000036
117.26	8.91565	16.1787	40	1000000002
96.3621	57.0431	18.3466	40	1000000000
143.875	58.2182	19.4514	40	1000000028
195.13	64.8892	13.8331	40	1000000025
177.561	10.6858	20.9745	40	1000000001
147.087	89.5987	1	40	1000000007
116.094	111.36	1	40	1000000033
129.121	138.212	1	40	1000000005
162.05	97.5582	7.71685	40	1000000020
105.992	108.138	9.8442	40	1000000026
162.829	145.517	8.40253	40	1000000018
146.575	109.271	21.8765	40	1000000006
104.744	156.761	22.8417	40	1000000004
87.4539	119.114	28.3506	40	1000000016
176.93	110.894	1	40	1000000034
178.613	153.926	8.83379	40	1000000031
198.372	158.639	9.39709	40	1000000015
199.615	91.0937	11.589	40	1000000010
189.065	130.6	14.8641	40	1000000030
110.68	181.835	9.46356	40	1000000008
145.044	207.783	11.7723	40	1000000013
143.802	181.291	19.2969	40	1000000029
127.715	191.222	19.8553	40	1000000011
144.426	195.862	21.3519	40	1000000012
158.342	176.296	28.8677	40	1000000009
112.88	197.042	29.0221	40	1000000023
185.222	179.104	16.2052	40	1000000027
190.771	207.783	19.0206	40	1000000021
167.069	202.085	24.7174	40	1000000032
182.852	193.82	28.0568	40	1000000024
156.331	133.838	32.9811	40	1000000019
127.369	175.773	33.0622	40	1000000014
183.35	134.567	1	40	1000000022
59.1134	131.857	23.6318	40	1000000042
28.5898	201.257	13.4254	40	1000000043
54.2052	45.1169	19.7099	41	1000000035
94.2906	81.199	1	41	1000000017
99.318	74.0591	11.0226	41	1000000036
117.339	7.07727	13.6485	41	1000000002
138.532	41.1726	14.4315	41	1000000003
96.3367	57.2058	16.1855	41	1000000000
141.299	58.1246	20.0916	41	1000000028
195.35	63.9345	15.3193	41	1000000025
178.128	9.26686	20.6404	41	1000000001
147.634	89.9446	1	41	1000000007
116.527	111.881	1	41	1000000033
129.671	138.438	1	41	1000000005
103.999	109.42	10.8904	41	1000000026
145.963	108.753	22.1999	41	1000000006
105.909	156.705	22.548	41	1000000004
87.3606	118.232	28.5217	41	1000000016
176.866	112.273	1	41	1000000034
176.023	132.25	2.77173	41	1000000022
163.091	97.8008	7.14552	41	1000000020
163.493	145.811	8.73948	41	1000000018
178.575	153.547	8.77485	41	1000000031
198.237	159.164	9.33308	41	1000000015
199.773	91.4571	11.2457	41	1000000010
188.952	128.432	14.3273	41	1000000030
110.103	181.807	11.416	41	1000000008
145.417	207.783	12.4871	41	1000000013
126.78	192.893	17.984	41	1000000011
144.585	180.566	20.8346	41	1000000029
143.37	195.639	21.3125	41	1000000012
158.022	175.934	30.5615	41	1000000009
115.022	197.547	31.4654	41	1000000023
184.567	177.01	16.3463	41	1000000027
191.242	207.783	19.1223	41	1000000021
167.499	201.304	23.5216	41	1000000032
180.042	194.135	26.8415	41	1000000024
158.9	132.68	33.33	41	1000000019
127.604	174.687	34.5922	41	1000000014
58.337	129.856	23.1898	41	1000000042
29.2985	199.991	14.4625	41	1000000043
55.1045	45.8462	20.3909	42	1000000035
94.6713	81.3486	1	42	1000000017
98.653	73.5285	9.63054	42	1000000036
117.045	6.05308	13.9035	42	1000000002
136.257	40.8765	14.813	42	1000000003
96.5858	57.5493	15.1228	42	1000000000
139.252	58.1356	21.3342	42	1000000028
150.982	59.2936	24.2967	42	1000000037
194.745	63.1472	13.8423	42	1000000025
179.915	9.50926	20.3164	42	1000000001
146.82	89.2023	1	42	1000000007
113.605	110.486	1	42	1000000033
129.687	138.174	1	42	1000000005
104.451	110.905	11.6327	42	1000000026
143.736	109.486	20.6446	42	1000000006
105.784	156.422	20.6091	42	1000000004
89.443	118.241	27.1677	42	1000000016
176.481	112.484	1	42	1000000034
174.307	131.279	2.3192	42	1000000022
163.139	97.401	6.39895	42	1000000020
164.736	145.725	8.51677	42	1000000018
180.269	151.556	8.45296	42	1000000031
197.628	157.927	8.39975	42	1000000015
199.368	91.7859	10.6795	42	1000000010
189.621	127.235	13.6418	42	1000000030
145.539	207.783	11.7952	42	1000000013
110.66	180.419	13.5569	42	1000000008
127.469	192.132	15.8731	42	1000000011
144.649	180.514	19.9789	42	1000000029
142.404	195.098	21.1912	42	1000000012
156.89	176.943	29.0194	42	1000000009
115.628	196.841	31.5384	42	1000000023
183.319	175.635	16.5765	42	1000000027
191.461	207.783	16.5694	42	1000000021
167.604	200.229	21.2161	42	1000000032
179.732	193.389	24.177	42	1000000024
160.393	132.038	33.1255	42	1000000019
22.0121	207.783	43	42	1000000038
127.942	174.018	32.9837	42	1000000014
58.1096	129.506	22.0331	42	1000000042
30.5402	198.869	14.5975	42	1000000043
55.2556	45.5192	19.2543	43	1000000035
95.2855	81.1897	1	43	1000000017
98.9183	74.0032	9.03583	43	1000000036
116.453	5.91297	13.2169	43	1000000002
97.8225	58.4878	13.7798	43	1000000000
132.8	41.4349	15.2892	43	1000000003
137.485	57.8548	22.461	43	1000000028
150.882	58.7448	22.2304	43	1000000037
194.059	62.9986	13.0376	43	1000000025
180.5	10.1373	18.6447	43	1000000001
147.18	88.4726	1	43	1000000007
113.675	111.129	1	43	1000000033
129.831	139.69	1	43	1000000005
105.65	111.041	10.1572	43	1000000026
105.72	154.568	19.1038	43	1000000004
142.03	111.041	20.1578	43	1000000006
88.8256	119.85	26.0277	43	1000000016
177.025	112.907	1	43	1000000034
174.283	130.944	1	43	1000000022
164.743	96.6452	4.84799	43	1000000020
181.298	151.823	7.41056	43	1000000031
199.303	92.7236	9.9447	43	1000000010
165.279	146.588	9.13439	43	1000000018
199.091	156.583	8.37439	43	1000000015
190.982	126.493	12.9298	43	1000000030
146.976	207.783	10.6331	43	1000000013
112.024	179.648	13.4742	43	1000000008
119.055	207.783	13.5622	43	1000000039
129.511	193.408	15.0959	43	1000000011
146.978	181.688	19.5846	43	1000000029
141.989	194.535	21.6062	43	1000000012
131.249	174.674	31.4584	43	1000000014
156.984	179.517	30.918	43	1000000009
116.972	197.757	31.2568	43	1000000023
183.601	174.503	18.9027	43	1000000027
193.916	207.783	18.4999	43	1000000021
167.946	199.456	20.9062	43	1000000032
181.171	192.967	23.1228	43	1000000024
161.385	130.718	33.1287	43	1000000019
23.9612	207.783	38.9078	43	1000000038
59.1485	129.311	21.3501	43	1000000042
32.0932	198.578	14.4306	43	1000000043
55.1718	46.7503	18.6909	44	1000000035
99.0055	74.4282	8.52111	44	1000000036
116.428	4.24972	14.7612	44	1000000002
131.076	42.3994	14.5253	44	1000000003
100.312	57.8856	14.5835	44	1000000000
150.129	58.5849	20.7762	44	1000000037
136.479	57.2944	24.5483	44	1000000028
193.752	63.155	12.7774	44	1000000025
182.729	12.3708	17.8045	44	1000000001
175.12	27.2975	20.3792	44	1000000040
170.747	72.2842	20.8489	44	1000000041
96.4426	81.4851	1	44	1000000017
148.592	88.1323	1	44	1000000007
114.268	111.606	1	44	1000000033
131.879	140.817	1	44	1000000005
105.676	112.959	11.0881	44	1000000026
106.6	155.388	18.3871	44	1000000004
142.155	112.878	20.662	44	1000000006
92.0052	120.131	26.27	44	1000000016
177.724	113.911	1	44	1000000034
174.25	130.799	1	44	1000000022
165.943	96.4125	4.96578	44	1000000020
183.219	150.799	7.82961	44	1000000031
199.517	91.95	9.57549	44	1000000010
166.962	147.779	8.12428	44	1000000018
200.346	157.005	8.11334	44	1000000015
192.005	125.555	13.0429	44	1000000030
148.896	207.783	9.92393	44	1000000013
112.127	180.051	13.9322	44	1000000008
119.879	207.783	12.8324	44	1000000039
130.963	194.705	14.8648	44	1000000011
146.972	182.537	19.9691	44	1000000029
141.747	194.899	21.8873	44	1000000012
131.805	175.913	29.3765	44	1000000014
155.803	179.148	30.5299	44	1000000009
118.278	198.639	30.3341	44	1000000023
196.859	207.783	18.5002	44	1000000021
184.957	175.397	20.5122	44	1000000027
181.563	193.852	23.3911	44	1000000024
168.361	199.752	22.0773	44	1000000032
162.368	130.324	33.1895	44	1000000019
25.3471	207.783	37.8976	44	1000000038
59.9447	130.697	20.7068	44	1000000042
33.5965	197.344	13.7209	44	1000000043
57.0741	46.6041	15.1178	45	1000000035
97.012	79.7437	1	45	1000000017
98.3616	74.9173	8.6245	45	1000000036
117.025	2.42142	15.8653	45	1000000002
130.727	42.4427	14.3525	45	1000000003
102.616	58.4946	15.598	45	1000000000
149.56	57.8273	19.5367	45	1000000037
136.38	57.6791	25.8233	45	1000000028
194.327	62.3297	11.6602	45	1000000025
183.855	13.046	17.9597	45	1000000001
174.434	25.7634	19.2082	45	1000000040
174.774	71.9141	19.4367	45	1000000041
149.792	87.4378	1	45	1000000007
115.234	112.113	1	45	1000000033
133.292	141.501	1	45	1000000005
106.503	113.401	10.8834	45	1000000026
107.827	155.627	17.6027	45	1000000004
141.566	111.394	20.5967	45	1000000006
94.356	119.947	27.3608	45	1000000016
175.998	115.368	1	45	1000000034
175.136	131.774	1	45	1000000022
168.112	95.9571	4.2877	45	1000000020
169.193	149.642	7.02117	45	1000000018
198.778	90.25	8.2948	45	1000000010
184.888	151.307	8.4487	45	1000000031
201.89	157.702	9.01542	45	1000000015
193.217	124.186	13.5952	45	1000000030
150.817	206.794	9.23617	45	1000000013
119.886	207.783	11.8909	45	1000000039
133.251	194.932	13.5784	45	1000000011
111.829	180.05	14.3278	45	1000000008
147.13	184.376	21.6009	45	1000000029
142.433	195.485	21.423	45	1000000012
131.755	176.772	27.4906	45	1000000014
119.156	198.779	27.7577	45	1000000023
153.58	176.165	29.3875	45	1000000009
197.608	207.783	16.522	45	1000000021
166.412	200.262	21.3701	45	1000000032
181.172	194.908	22.1824	45	1000000024
184.109	176.44	25.7648	45	1000000027
162.133	130.807	32.2635	45	1000000019
24.2157	207.783	37.1363	45	1000000038
58.4899	130.13	21.3799	45	1000000042
33.6707	196.28	13.2182	45	1000000043
57.0228	46.8335	13.4233	46	1000000035
96.092	79.6649	1	46	1000000017
98.271	74.8861	8.60257	46	1000000036
129.562	42.822	13.7579	46	1000000003
102.451	58.2986	15.6588	46	1000000000
117.185	0.819825	16.6237	46	1000000002
147.858	55.7799	19.5252	46	1000000037
134.129	57.262	26.9539	46	1000000028
194.924	61.1984	12.2547	46	1000000025
184.054	12.7781	16.1494	46	1000000001
172.903	23.1569	18.287	46	1000000040
174.353	72.0345	18.5483	46	1000000041
150.134	86.5149	1	46	1000000007
116.329	112.434	1	46	1000000033
133.698	140.297	1	46	1000000005
106.681	113.405	11.5874	46	1000000026
107.866	155.832	17.1589	46	1000000004
139.116	111.429	18.8596	46	1000000006
95.3472	120.437	26.6544	46	1000000016
162.451	132.552	30.4545	46	1000000019
172.974	116.126	1	46	1000000034
175.756	131.804	1	46	1000000022
169.334	95.0014	6.42377	46	1000000020
198.03	88.3828	8.18796	46	1000000010
185.28	150.304	9.52303	46	1000000031
168.923	150.906	8.76921	46	1000000018
202.239	156.002	9.07887	46	1000000015
194.494	122.497	14.4913	46	1000000030
152.193	204.313	7.75552	46	1000000013
119.014	207.783	10.7649	46	1000000039
112.475	180.243	13.7133	46	1000000008
133.536	195.171	13.0992	46	1000000011
146.735	184.012	19.8377	46	1000000029
142.596	195.687	21.3635	46	1000000012
133.011	175.905	26.9515	46	1000000014
120.309	200.206	26.9533	46	1000000023
152.862	176.662	28.5391	46	1000000009
197.571	207.783	16.9721	46	1000000021
180.431	194.376	20.2751	46	1000000024
165.751	199.716	20.1301	46	1000000032
184.46	175.732	28.2343	46	1000000027
23.0179	207.783	37.5207	46	1000000038
56.7832	129.091	24.5269	46	1000000042
34.0154	195.527	12.2978	46	1000000043
58.6783	45.221	10.6226	47	1000000035
95.8096	81.0533	1	47	1000000017
101.429	73.6762	6.77752	47	1000000036
130.346	40.837	15.375	47	1000000003
104.838	56.4688	17.1541	47	1000000000
117.384	0.318198	18.719	47	1000000002
149.137	55.0095	19.626	47	1000000037
134.87	57.2243	27.3561	47	1000000028
195.218	59.8318	11.3169	47	1000000025
184.927	11.5231	16.9765	47	1000000001
171.434	21.2373	16.7832	47	1000000040
173.729	71.1885	18.325	47	1000000041
150.41	85.7298	1	47	1000000007
119.092	112.596	1	47	1000000033
133.762	141.531	1	47	1000000005
107.304	112.289	13.0506	47	1000000026
108.451	155.137	16.9844	47	1000000004
136.276	106.961	19.5402	47	1000000006
96.5232	118.653	24.6472	47	1000000016
172.758	115.243	1	47	1000000034
177.072	132.369	1	47	1000000022
169.886	151.273	4.55639	47	1000000018
198.325	87.323	7.88449	47	1000000010
170.454	94.0011	6.7699	47	1000000020
185.44	150.419	8.99186	47	1000000031
203.121	155.107	8.67622	47	1000000015
196.784	120.959	14.7651	47	1000000030
163.492	133.923	28.5149	47	1000000019
153.819	204.265	6.32389	47	1000000013
119.739	207.783	9.70986	47	1000000039
133.753	195.156	11.8102	47	1000000011
112.404	179.882	13.0571	47	1000000008
149.235	184.014	18.9152	47	1000000029
143.891	193.795	20.3087	47	1000000012
134.801	175.183	25.6108	47	1000000014
122.801	200.686	25.6254	47	1000000023
152.773	173.06	26.3827	47	1000000009
182.035	194.409	16.4927	47	1000000024
165.582	200.027	17.2552	47	1000000032
198.804	207.783	16.9987	47	1000000021
183.955	173.864	29.3474	47	1000000027
21.5374	203.368	37.1388	47	1000000038
57.2187	129.142	23.2066	47	1000000042
35.9169	194.527	11.6119	47	1000000043
59.7015	44.0859	8.42466	48	1000000035
94.7056	81.3333	1	48	1000000017
101.452	72.448	7.31049	48	1000000036
129.515	38.7245	16.3007	48	1000000003
105.671	55.945	17.6465	48	1000000000
150.25	53.7206	18.618	48	1000000037
118.624	0.318198	20.163	48	1000000002
134.562	56.4031	27.3655	48	1000000028
194.324	58.1405	11.0924	48	1000000025
184.647	9.56861	16.5329	48	1000000001
171.242	19.6393	17.694	48	1000000040
178.306	69.8144	19.0455	48	1000000041
150.677	85.0721	1	48	1000000007
120.431	112.763	1	48	1000000033
135.921	142.893	1	48	1000000005
107.199	111.505	12.7303	48	1000000026
109.757	154.16	15.6463	48	1000000004
136.234	106.473	19.731	48	1000000006
96.5247	118.857	24.2656	48	1000000016
172.089	114.686	1	48	1000000034
178.619	131.21	1	48	1000000022
171.232	150.509	1	48	1000000018
197.01	85.3871	6.27003	48	1000000010
172.323	91.6332	6.3415	48	1000000020
186.115	149.139	9.11375	48	1000000031
205.519	154.791	8.93929	48	1000000015
198.321	120.323	14.9193	48	1000000030
164.084	137.075	29.7221	48	1000000019
155.586	202.916	4.10232	48	1000000013
118.465	207.783	7.86273	48	1000000039
133.294	193.785	9.81215	48	1000000011
112.151	180.793	12.585	48	1000000008
150.906	183.751	18.0221	48	1000000029
143.838	194.039	19.5761	48	1000000012
151.872	168.999	23.5774	48	1000000009
134.89	173.805	25.0016	48	1000000014
121.938	200.19	25.1152	48	1000000023
182.949	193.434	17.3959	48	1000000024
166.553	199.599	16.187	48	1000000032
198.65	204.147	19.3565	48	1000000021
184.236	172.378	28.935	48	1000000027
19.9873	203.065	36.1849	48	1000000038
57.7674	130.454	21.6375	48	1000000042
36.7896	192.333	12.13	48	1000000043
60.3492	42.5744	6.90144	49	1000000035
104.031	70.7804	5.88224	49	1000000036
130.019	38.5461	15.8142	49	1000000003
152.067	53.1408	17.6363	49	1000000037
119.478	0.318198	18.6632	49	1000000002
106.057	55.2383	18.3716	49	1000000000
134.944	55.5351	25.1149	49	1000000028
195.812	58.1885	11.1709	49	1000000025
182.17	8.24119	16.7735	49	1000000001
170.843	18.2068	16.889	49	1000000040
179.45	70.1953	18.001	49	1000000041
93.4627	82.901	1	49	1000000017
151.592	85.1731	1	49	1000000007
121.074	112.277	1	49	1000000033
137.15	144.756	1	49	1000000005
108.623	110.64	12.3308	49	1000000026
110.467	152.917	14.3535	49	1000000004
135.714	107.1	19.472	49	1000000006
99.1171	118.92	25.7822	49	1000000016
172.641	114.676	1	49	1000000034
178.861	131.889	1	49	1000000022
170.442	151.616	2.36655	49	1000000018
197.671	84.5173	4.25888	49	1000000010
173.399	91.3615	6.27383	49	1000000020
186.321	148.692	9.24278	49	1000000031
206.843	154.924	10.1792	49	1000000015
197.966	119.676	14.5361	49	1000000030
165.233	138.635	28.6824	49	1000000019
155.688	201.848	3.07392	49	1000000013
120.082	207.783	7.25195	49	1000000039
134.554	193.215	9.65275	49	1000000011
111.386	180.386	12.1029	49	1000000008
149.229	182.25	18.0696	49	1000000029
143.67	193.21	18.1108	49	1000000012
152.113	168.386	23.6088	49	1000000009
121.066	198.685	23.0545	49	1000000023
135.511	173.204	24.8803	49	1000000014
166.561	200.106	14.5375	49	1000000032
184.566	193.23	17.1893	49	1000000024
199.297	202.478	18.0727	49	1000000021
185.278	171.272	28.1079	49	1000000027
19.3009	202.108	35.6946	49	1000000038
57.8833	130.892	21.9639	49	1000000042
37.9128	190.464	10.7504	49	1000000043
61.5039	41.8256	5.49563	50	1000000035
105.61	70.1977	3.1661	50	1000000036
129.556	38.8008	16.4611	50	1000000003
153.369	53.4488	17.5914	50	1000000037
118.822	0.318198	19.2708	50	1000000002
104.82	56.4777	18.0322	50	1000000000
134.56	57.0746	25.1225	50	1000000028
196.62	57.3452	10.2482	50	1000000025
169.684	18.1349	13.8149	50	1000000040
181.469	7.04486	16.4355	50	1000000001
181.51	71.0605	18.2739	50	1000000041
92.7728	83.5588	1	50	1000000017
152.604	84.7973	1	50	1000000007
121.739	113.321	1	50	1000000033
138.413	148.587	1	50	1000000005
107.751	109.797	12.9124	50	1000000026
109.353	152.32	12.9176	50	1000000004
134.201	107.757	20.6852	50	1000000006
100.517	118.715	25.8994	50	1000000016
198.282	83.2422	1	50	1000000010
170.815	114.945	1	50	1000000034
178.029	131.53	1	50	1000000022
170.983	152.233	1	50	1000000018
173.847	91.1315	5.08567	50	1000000020
187.415	148.624	9.49358	50	1000000031
205.47	154.81	10.4554	50	1000000015
198.95	119.214	14.9233	50	1000000030
167.005	140.657	29.0637	50	1000000019
156.318	202.047	1	50	1000000013
118.685	207.783	6.27892	50	1000000039
134.939	194.658	8.26558	50	1000000011
112.72	180.454	10.4315	50	1000000008
148.824	184.031	17.7019	50	1000000029
143.618	193.264	17.5241	50	1000000012
121.679	197.49	19.8892	50	1000000023
152.64	167	22.2626	50	1000000009
136.108	173.835	25.2453	50	1000000014
167.058	200.549	13.1261	50	1000000032
186.017	194.063	17.3407	50	1000000024
199.485	202.109	17.7125	50	1000000021
184.397	172.288	25.8413	50	1000000027
19.455	202.383	34.577	50	1000000038
58.3668	131.053	20.4086	50	1000000042
39.2306	191.213	9.89649	50	1000000043
62.7564	42.1342	3.83159	51	1000000035
105.938	70.3283	3.24031	51	1000000036
131.646	39.1757	17.0524	51	1000000003
153.91	53.0268	17.2624	51	1000000037
103.706	56.7124	16.6465	51	1000000000
118.867	0.318198	19.7603	51	1000000002
135.665	57.8316	24.98	51	1000000028
196.937	55.6099	9.10894	51	1000000025
168.943	17.5294	13.0294	51	1000000040
179.758	6.10638	15.656	51	1000000001
182.223	69.3368	18.0397	51	1000000041
92.469	83.1842	1	51	1000000017
153.479	84.3161	1	51	1000000007
121.363	114.376	1	51	1000000033
138.907	152.978	1	51	1000000005
106.598	108.842	12.5252	51	1000000026
108.72	151.66	12.5701	51	1000000004
133.749	109.072	19.2085	51	1000000006
101.919	117.776	25.1279	51	1000000016
198.283	82.2673	1	51	1000000010
171.363	115.641	1	51	1000000034
176.779	132.838	1	51	1000000022
171.52	153.732	1	51	1000000018
174.829	91.4147	4.34331	51	1000000020
188.148	148.406	9.65972	51	1000000031
205.627	155.16	9.84787	51	1000000015
199.294	119.489	12.9515	51	1000000030
171.363	142.507	31.4588	51	1000000019
157.034	203.236	2.09514	51	1000000013
119.296	207.783	5.47985	51	1000000039
135.569	196.358	6.4801	51	1000000011
113.296	179.844	10.2605	51	1000000008
149.234	183.147	17.3673	51	1000000029
140.765	189.584	16.1401	51	1000000012
123.311	196.414	18.1802	51	1000000023
154.588	165.129	20.4532	51	1000000009
138.203	173.51	25.755	51	1000000014
168.092	200.614	12.7883	51	1000000032
199.768	202.521	17.3769	51	1000000021
185.801	195.683	19.154	51	1000000024
184.72	171.97	25.7888	51	1000000027
18.9448	205.069	33.4267	51	1000000038
59.2154	131.406	19.5715	51	1000000042
39.7788	191.09	9.36504	51	1000000043
64.2324	40.3571	1	52	1000000035
107.222	70.2725	2.12828	52	1000000036
132.492	37.5409	17.0679	52	1000000003
155.63	50.9014	17.7189	52	1000000037
105.478	56.1867	16.4287	52	1000000000
118.98	0.318198	18.5234	52	1000000002
136.955	57.6632	24.7868	52	1000000028
200.414	81.1213	1	52	1000000010
198.32	55.0417	7.56819	52	1000000025
168.835	17.4425	11.8131	52	1000000040
179.816	3.74932	16.8618	52	1000000001
183.787	68.442	16.239	52	1000000041
93.2704	82.9796	1	52	1000000017
153.849	83.6475	1	52	1000000007
122.568	114.922	1	52	1000000033
141.581	155.48	1	52	1000000005
106.886	108.296	11.7745	52	1000000026
111.05	150.213	10.3112	52	1000000004
134.538	109.05	18.2128	52	1000000006
103.045	117.244	24.273	52	1000000016
172.167	115.95	1	52	1000000034
175.919	133.637	1	52	1000000022
173.965	153.687	1	52	1000000018
176.786	92.1198	4.59769	52	1000000020
207.783	155.47	9.99647	52	1000000015
198.949	119.767	11.5906	52	1000000030
188.898	149.267	11.1894	52	1000000031
174.346	144.513	31.5557	52	1000000019
20.6903	207.783	29.441	52	1000000038
160.169	202.8	1	52	1000000013
136.147	196.315	4.96023	52	1000000011
119.145	207.783	4.59266	52	1000000039
113.852	179.057	10.9145	52	1000000008
141.484	188.254	15.5004	52	1000000012
124.687	195.122	17.0637	52	1000000023
156.671	163.74	19.6884	52	1000000009
150.578	183.435	18.9113	52	1000000029
138.846	172.296	26.683	52	1000000014
169.903	201.373	11.2523	52	1000000032
187.28	195.904	16.7877	52	1000000024
199.562	201.598	18.9863	52	1000000021
186.522	171.537	26.3371	52	1000000027
60.3037	129.922	19.1942	52	1000000042
42.2857	190.97	8.17492	52	1000000043
64.9417	38.7074	1	53	1000000035
106.861	69.7184	1	53	1000000036
132.619	36.5341	16.9661	53	1000000003
107.329	56.7673	16.5577	53	1000000000
119.926	0.318198	18.2274	53	1000000002
157.874	48.0698	18.7523	53	1000000037
137.565	58.4626	24.6189	53	1000000028
200.495	80.6072	1	53	1000000010
198.304	53.938	7.39066	53	1000000025
167.691	15.6596	13.7184	53	1000000040
181.489	1.9483	16.2766	53	1000000001
183.152	67.9187	16.2379	53	1000000041
93.7054	82.1663	1	53	1000000017
153.452	83.6686	1	53	1000000007
123.035	114.999	1	53	1000000033
143.364	156.911	1	53	1000000005
106.37	107.719	11.7042	53	1000000026
110.169	149.008	10.4638	53	1000000004
134.365	107.77	18.3787	53	1000000006
156.988	161.507	20.423	53	1000000009
103.933	118.144	22.9086	53	1000000016
174.357	116.633	1	53	1000000034
174.076	133.59	1	53	1000000022
174.021	153.496	1	53	1000000018
178.544	91.9245	3.49387	53	1000000020
199.582	119.136	11.4719	53	1000000030
188.59	148.411	11.4191	53	1000000031
207.783	156.954	10.336	53	1000000015
177.017	145.839	30.9635	53	1000000019
20.6028	207.783	28.4976	53	1000000038
161.328	201.557	1	53	1000000013
134.231	195.483	5.01167	53	1000000011
118.907	207.783	5.45136	53	1000000039
113.577	178.714	9.71375	53	1000000008
141.642	187.128	13.7146	53	1000000012
126.803	195.477	17.1907	53	1000000023
150.959	183.52	19.4382	53	1000000029
140.481	173.101	23.8443	53	1000000014
170.632	201.965	10.9091	53	1000000032
187.123	195.539	16.6396	53	1000000024
198.877	201.18	20.6447	53	1000000021
187.657	170.212	27.6787	53	1000000027
60.7861	129.9	19.5671	53	1000000042
42.3481	189.959	5.60973	53	1000000043
64.5995	38.4479	1	54	1000000035
107.475	70.4518	1	54	1000000036
133.374	35.626	15.9093	54	1000000003
106.496	56.0604	16.1936	54	1000000000
119.836	0.318198	19.1885	54	1000000002
159.298	45.8477	19.4352	54	1000000037
138.314	58.4153	25.4654	54	1000000028
201.588	79.3196	1	54	1000000010
198.972	51.947	7.03497	54	1000000025
169.615	13.853	11.7698	54	1000000040
184.027	65.9564	14.5574	54	1000000041
92.0269	81.5118	1	54	1000000017
154.897	83.0805	1	54	1000000007
123.536	115.039	1	54	1000000033
144.897	156.884	1	54	1000000005
106.435	107.11	10.9917	54	1000000026
111.112	146.659	11.2238	54	1000000004
135.779	107.49	16.6944	54	1000000006
158.306	159.995	19.4523	54	1000000009
104.469	116.94	21.1167	54	1000000016
174.802	114.839	1	54	1000000034
172.995	134.246	1	54	1000000022
175.694	152.52	1	54	1000000018
179.277	89.9135	4.31773	54	1000000020
199.614	116.978	11.7343	54	1000000030
207.783	155.32	10.2722	54	1000000015
188.34	147.333	13.7525	54	1000000031
178.345	146.183	31.2743	54	1000000019
21.3435	207.783	26.9084	54	1000000038
141.803	195.822	2.83496	54	1000000011
119.875	207.783	3.82817	54	1000000039
116.219	177.003	9.23733	54	1000000008
142.391	185.972	11.8069	54	1000000012
128.279	193.25	16.0289	54	1000000023
151.458	183.164	18.8298	54	1000000029
141.568	173.144	23.4529	54	1000000014
164.057	201.328	1	54	1000000013
171.761	201.026	10.6727	54	1000000032
186.922	195.125	14.8065	54	1000000024
198.007	199.588	22.2001	54	1000000021
188.764	168.943	27.3621	54	1000000027
62.3284	128.846	19.2997	54	1000000042
43.5236	189.263	3.06923	54	1000000043
66.1043	37.6457	1	55	1000000035
107.75	71.4908	1	55	1000000036
90.4586	81.1964	1	55	1000000017
133.769	35.7177	15.0838	55	1000000003
106.495	57.0853	15.8126	55	1000000000
118.442	0.318198	18.1682	55	1000000002
160.143	45.8092	19.805	55	1000000037
139.409	59.9433	23.2303	55	1000000028
204.175	79.215	1	55	1000000010
199.338	52.2538	6.73678	55	1000000025
170.356	13.4546	10.4119	55	1000000040
184.265	65.0129	13.0883	55	1000000041
153.919	82.3274	1	55	1000000007
124.426	115.85	1	55	1000000033
147.265	157.213	1	55	1000000005
105.976	105.635	10.4005	55	1000000026
112.135	144.574	11.0393	55	1000000004
134.408	106.461	16.5745	55	1000000006
104.14	116.738	20.0845	55	1000000016
158.015	158.946	21.4923	55	1000000009
176.467	114.533	1	55	1000000034
171.468	134.95	1	55	1000000022
174.528	152.829	1	55	1000000018
180.217	90.012	3.64654	55	1000000020
207.783	155.356	8.80888	55	1000000015
200.468	116.102	12.898	55	1000000030
187.525	147.292	14.8412	55	1000000031
179.253	147.246	30.8382	55	1000000019
21.5347	207.783	24.8204	55	1000000038
142.321	196.421	1	55	1000000011
118.653	207.783	2.50683	55	1000000039
119.861	172.934	10.086	55	1000000008
142.039	185.123	11.6637	55	1000000012
129.269	193.556	16.5732	55	1000000023
151.917	182.913	19.4822	55	1000000029
140.949	173.688	23.2474	55	1000000014
165.671	201.914	1	55	1000000013
172.847	201.531	9.11993	55	1000000032
187.205	195.87	13.4305	55	1000000024
198.306	199.356	22.5622	55	1000000021
188.019	168.831	26.3149	55	1000000027
61.9146	128.181	19.0159	55	1000000042
45.2945	191.551	5.16997	55	1000000043
67.2157	36.9389	1	56	1000000035
108.938	71.547	1	56	1000000036
90.0215	81.1444	1	56	1000000017
153.731	81.1167	1	56	1000000007
133.936	34.5662	15.3891	56	1000000003
118.89	0.318198	17.3334	56	1000000002
105.76	56.9008	17.1439	56	1000000000
160.816	44.8806	19.7463	56	1000000037
140.267	60.0676	24.0379	56	1000000028
206.024	79.9679	1	56	1000000010
199.93	51.8139	6.3659	56	1000000025
172.374	15.7855	9.13	56	1000000040
185.941	64.8008	11.4739	56	1000000041
125.071	115.211	1	56	1000000033
147.163	158.467	1	56	1000000005
104.329	105.364	9.18237	56	1000000026
112.471	142.549	12.6797	56	1000000004
134.073	105.213	14.5117	56	1000000006
104.066	116.128	18.5587	56	1000000016
158.925	158.429	21.3261	56	1000000009
176.308	114.683	1	56	1000000034
171.306	136.559	1	56	1000000022
175.22	153.015	1	56	1000000018
180.391	90.5585	3.04901	56	1000000020
207.783	152.975	8.15769	56	1000000015
202.979	115.247	12.5608	56	1000000030
186.947	146.258	16.4614	56	1000000031
20.9996	207.783	21.8794	56	1000000038
144.157	196.57	1	56	1000000011
118.114	207.783	1	56	1000000039
120.777	169.742	11.6803	56	1000000008
140.964	183.299	10.0627	56	1000000012
130.56	190.764	15.4747	56	1000000023
150.46	182.947	21.0987	56	1000000029
140.217	171.815	23.6492	56	1000000014
167.64	201.449	1	56	1000000013
172.801	200.287	8.29866	56	1000000032
186.648	196.637	12.3398	56	1000000024
198.522	199.151	23.2631	56	1000000021
187.853	167.995	24.3139	56	1000000027
62.1702	127.283	17.7706	56	1000000042
48.5546	192.232	7.24227	56	1000000043
70.1294	35.1509	1	57	1000000035
110.554	70.4605	1	57	1000000036
153.525	79.4298	1	57	1000000007
88.4054	80.4021	1	57	1000000017
134.422	34.9369	13.4751	57	1000000003
118.925	0.318198	15.529	57	1000000002
160.19	44.4457	19.6152	57	1000000037
106.128	56.9204	20.5397	57	1000000000
142.625	60.3863	25.1388	57	1000000028
[truncated: 1,027 more rows]

## Sheet: NCadM-3-NcadMSide
Position
Position X	Position Y	Position Z	Time	TrackID
73.8529	61.7713	9.41505	1	1000000000
141.929	79.5263	19.0616	1	1000000001
159.819	46.5717	22.1052	1	1000000002
196.863	26.2509	19.3012	1	1000000003
19.0179	127.7	12.2248	1	1000000004
26.5253	141.664	16.6758	1	1000000005
131.098	115.151	28.2573	1	1000000006
176.533	84.9978	17.7124	1	1000000007
180.662	110.394	30.3942	1	1000000008
95.6881	166.913	16.6788	1	1000000009
131.514	189.374	31.1202	1	1000000010
181.699	177.89	21.4706	1	1000000011
195.974	207.784	31.8391	1	1000000012
122.978	112.767	32.0206	1	1000000013
206.365	120.171	33.4371	1	1000000014
123.628	167.737	43	1	1000000015
140.029	99.2063	12.4457	1	1000000016
125.232	158.228	27	1	1000000017
147.094	162.495	35	1	1000000018
72.9011	59.2119	8.96294	2	1000000000
141.485	76.9521	18.4191	2	1000000001
155.664	43.8804	21.558	2	1000000002
196.395	26.1507	19.6016	2	1000000003
18.2183	125.491	13.9955	2	1000000004
24.8886	137.945	17.1032	2	1000000005
131.683	114.93	27.2128	2	1000000006
121.734	112.619	30.1867	2	1000000013
177.366	84.4533	17.6841	2	1000000007
178.035	111.828	31.3173	2	1000000008
95.6585	166.244	16.1359	2	1000000009
134.194	189.78	31.4119	2	1000000010
181.331	177.901	22.0809	2	1000000011
194.68	207.784	31.0607	2	1000000012
205.303	121.123	33.1032	2	1000000014
123.271	167.664	43	2	1000000015
143.663	98.1258	11.7453	2	1000000016
124.93	156.274	27	2	1000000017
146.203	161.052	33	2	1000000018
73.0729	58.3752	12.0351	3	1000000000
141.071	74.6704	18.3938	3	1000000001
152.401	41.8387	21.443	3	1000000002
196.217	26.3807	20.3039	3	1000000003
19.4052	124.438	15.5377	3	1000000004
25.2102	137.122	18.2069	3	1000000005
120.749	112.11	29.4009	3	1000000013
135.066	113.058	28.7378	3	1000000006
176.631	83.8709	16.3938	3	1000000007
178.775	112.117	31.3327	3	1000000008
94.0512	165.971	15.8255	3	1000000009
134.014	187.009	31.276	3	1000000010
182.369	177.861	23.2905	3	1000000011
193.971	207.784	31.3688	3	1000000012
205.236	119.908	34.2665	3	1000000014
123.632	166.672	43	3	1000000015
140.99	95.1198	11.0625	3	1000000016
118.719	158.393	31	3	1000000017
145.823	159.921	33	3	1000000018
70.9853	58.58	13.6708	4	1000000000
140.339	73.8557	17.7984	4	1000000001
150.429	41.4236	21.8344	4	1000000002
195.265	27.3379	20.6398	4	1000000003
19.712	123.679	16.3934	4	1000000004
24.9715	133.84	20.4912	4	1000000005
117.419	114.642	26.1533	4	1000000013
133.185	112.346	29.1686	4	1000000006
176.341	83.1189	16.0091	4	1000000007
94.3833	166.692	17.2618	4	1000000009
135.63	185.758	30.7423	4	1000000010
183.771	177.937	24.6751	4	1000000011
179.988	110.978	32.065	4	1000000008
202.478	119.37	33.2998	4	1000000014
124.712	167.072	43	4	1000000015
192.418	205.152	34.1989	4	1000000012
139.312	92.1116	9.83591	4	1000000016
115.57	159.96	37	4	1000000017
145.499	157.888	33	4	1000000018
71.7229	58.4954	14.8853	5	1000000000
139.268	72.3763	18.1401	5	1000000001
149.297	38.3538	21.611	5	1000000002
195.945	28.0822	18.1536	5	1000000003
21.381	122.427	17.6322	5	1000000004
27.8224	132.281	21.7163	5	1000000005
117.791	115.389	24.6916	5	1000000013
134.665	110.948	30.0917	5	1000000006
178.013	85.0823	16.8937	5	1000000007
180.716	111.131	30.6073	5	1000000008
95.7003	166.713	18.8795	5	1000000009
133.307	183.038	31.0035	5	1000000010
183.561	178.461	24.5227	5	1000000011
201.467	120.288	33.0901	5	1000000014
124.573	167.985	43	5	1000000015
192.415	205.193	34.4501	5	1000000012
16.8304	108.204	1	5	1000000019
137.491	91.5084	10.5094	5	1000000016
115.152	160.504	35	5	1000000017
146.022	158.234	35	5	1000000018
71.1824	58.1348	14.1614	6	1000000000
139.524	71.1325	16.115	6	1000000001
149.084	37.8172	22.407	6	1000000002
195.866	28.7667	19.8593	6	1000000003
23.1057	122.812	17.5469	6	1000000004
29.7697	128.463	22.754	6	1000000005
118.442	115.026	24.7305	6	1000000013
134.004	108.777	29.388	6	1000000006
179.083	85.6384	19.2454	6	1000000007
180.789	110.28	29.0155	6	1000000008
202.214	120.4	31.4991	6	1000000014
99.45	166.377	19.1025	6	1000000009
133.177	181.321	29.8912	6	1000000010
183.663	178.387	24.6853	6	1000000011
124.394	168.382	43	6	1000000015
192.685	206.626	34.0897	6	1000000012
17.3021	110.295	1	6	1000000019
134.45	92.8714	12.3993	6	1000000016
116.12	161.351	33	6	1000000017
144.115	158.315	33	6	1000000018
70.4671	58.1273	12.991	7	1000000000
138.962	69.078	13.9626	7	1000000001
147.848	35.8199	24.2453	7	1000000002
194.874	28.0275	19.3697	7	1000000003
24.6425	121.538	15.9305	7	1000000004
31.5333	128.053	22.3684	7	1000000005
117.757	112.72	24.9879	7	1000000013
134.916	110.465	29.4669	7	1000000006
181.199	85.1668	20.3015	7	1000000007
180.571	107.227	27.817	7	1000000008
201.679	120.411	30.3387	7	1000000014
100.606	165.315	19.0315	7	1000000009
133.585	179.964	29.3258	7	1000000010
188.032	181.745	25.1556	7	1000000011
125.681	166.948	43	7	1000000015
191.535	206.72	33.56	7	1000000012
17.7992	110.599	1	7	1000000019
132.667	95.6859	11.7757	7	1000000016
115.391	159.159	31	7	1000000017
145.031	156.404	31	7	1000000018
71.0745	57.5767	13.6334	8	1000000000
140.666	68.0176	15.4768	8	1000000001
147.14	36.911	27.1208	8	1000000002
196.337	28.6693	18.8074	8	1000000003
25.1083	121.388	15.5145	8	1000000004
33.0934	125.21	22.4068	8	1000000005
116.386	115.154	21.8184	8	1000000013
135.458	109.41	29.079	8	1000000006
182.168	85.8868	21.2467	8	1000000007
179.94	105.431	29.6209	8	1000000008
201.915	120.158	28.8064	8	1000000014
99.9871	163.375	19.5351	8	1000000009
132.577	178.056	31.264	8	1000000010
191.658	185.748	24.437	8	1000000011
126.583	165.272	43	8	1000000015
188.738	202.533	35.2644	8	1000000012
16.856	111.149	1	8	1000000019
134.76	95.7369	12.8855	8	1000000016
113.003	158.569	29	8	1000000017
143.448	152.502	31	8	1000000018
121.774	85.2341	41	8	1000000020
0.318199	55.6492	6.95563	8	1000000021
69.5358	57.9357	14.7696	9	1000000000
141.11	65.1161	14.9179	9	1000000001
146.912	36.0847	27.1802	9	1000000002
196.457	27.1988	20.3776	9	1000000003
24.5975	123.526	14.1923	9	1000000004
117.497	114.121	21.3151	9	1000000013
133.892	108.085	28.326	9	1000000006
182.031	84.7509	21.5715	9	1000000007
199.028	119.117	27.9432	9	1000000014
178.728	101.886	28.5403	9	1000000008
104.351	163.085	20.3051	9	1000000009
192.65	185.28	24.3645	9	1000000011
131.249	177.36	33.1604	9	1000000010
126.282	164.424	43	9	1000000015
186.915	201.042	35.689	9	1000000012
17.4004	110.363	1	9	1000000019
79.1356	157.315	39.4726	9	1000000022
31.6807	125.566	19.3575	9	1000000005
133.982	93.5665	13.7803	9	1000000016
110.727	156.315	29	9	1000000017
141.65	152.014	31	9	1000000018
113.328	90.2623	43	9	1000000020
0.318199	55.3152	14.9767	9	1000000021
68.4491	56.6077	16.4314	10	1000000000
140.071	62.5785	14.5461	10	1000000001
147.748	37.9213	25.3415	10	1000000002
195.973	25.6237	21.5867	10	1000000003
23.8692	124.157	12.8908	10	1000000004
30.2074	122.276	20.7298	10	1000000005
106.499	162.821	18.1616	10	1000000009
117.294	114.441	21.7987	10	1000000013
132.247	107.318	27.3603	10	1000000006
181.365	83.5648	23.2577	10	1000000007
168.251	95.2121	22.6369	10	1000000023
197.769	120.035	27.0566	10	1000000014
181.271	100.637	28.5671	10	1000000008
194.744	185.405	25.1831	10	1000000011
126.482	162.855	43	10	1000000015
130.053	176.966	34.4766	10	1000000010
186.902	200.707	33.7076	10	1000000012
17.2762	110.414	1	10	1000000019
81.639	155.927	40.3655	10	1000000022
134.945	90.4361	15.8988	10	1000000016
107.935	156.82	29	10	1000000017
143.391	151.743	33	10	1000000018
106.79	91.6441	43	10	1000000020
0.318199	52.051	11.4824	10	1000000021
70.1003	55.4761	16.6152	11	1000000000
140.121	61.4808	15.4299	11	1000000001
148.526	40.7748	21.0886	11	1000000002
197.108	24.496	20.4393	11	1000000003
24.6657	123.217	12.5345	11	1000000004
119.329	114.582	22.1182	11	1000000013
132.052	105.976	26.3652	11	1000000006
165.416	95.3113	22.7622	11	1000000023
182.08	85.185	24.2669	11	1000000007
197.508	120.644	28.0634	11	1000000014
178.243	100.007	30.5916	11	1000000008
107.896	164.849	15.8128	11	1000000009
196	186.901	26.9707	11	1000000011
124.885	159.98	43	11	1000000015
127.498	174.92	35.2917	11	1000000010
188.843	198.547	34.2292	11	1000000012
17.4108	110.81	1	11	1000000019
82.9292	156.952	39.7254	11	1000000022
24.6657	123.214	12.5349	11	1000000005
138.141	88.9717	15.1373	11	1000000016
107.762	157.087	27	11	1000000017
143.063	149.692	33	11	1000000018
106.45	91.0499	41	11	1000000020
0.318199	50.1434	4.47028	11	1000000021
71.6721	52.5262	19.2805	12	1000000000
140.176	59.9198	13.8239	12	1000000001
148.928	40.2155	19.5045	12	1000000002
197.324	22.8753	21.5384	12	1000000003
24.4869	121.921	12.0847	12	1000000004
109.215	161.908	14.8296	12	1000000009
122.679	112.531	20.8252	12	1000000013
133.151	103.071	27.7849	12	1000000006
163.284	95.1211	22.6209	12	1000000023
196.505	121.164	25.747	12	1000000014
183.773	85.1495	27.2022	12	1000000007
178.736	99.1307	30.5806	12	1000000008
47.9278	207.784	15.9501	12	1000000024
195.266	185.23	25.611	12	1000000011
124.363	158.186	43	12	1000000015
128.194	171.842	37.8546	12	1000000010
189.892	196.32	33.2592	12	1000000012
18.0475	110.348	4.4953	12	1000000019
84.0074	155.571	37.73	12	1000000022
30.7454	118.948	18.2814	12	1000000005
139.108	87.181	12.7673	12	1000000016
103.283	154.199	25	12	1000000017
72.8675	204.305	24.0043	12	1000000025
146.582	147.933	33	12	1000000018
104.17	89.3348	39	12	1000000020
0.318199	46.485	4.37805	12	1000000021
73.637	51.7428	16.9015	13	1000000000
141.044	55.3481	13.3487	13	1000000001
148.886	37.8125	19.1969	13	1000000002
196.501	21.1549	23.5094	13	1000000003
23.968	122.275	11.041	13	1000000004
27.8515	117.071	23.3224	13	1000000005
109.392	160.462	15.5001	13	1000000009
121.759	111.273	19.7862	13	1000000013
133.444	100.009	28.7422	13	1000000006
163.129	93.8303	24.0325	13	1000000023
193.843	122.084	27.0369	13	1000000014
187.692	84.7967	28.7017	13	1000000007
180.244	101.486	29.1711	13	1000000008
47.8262	204.034	15.8461	13	1000000024
197.429	182.767	24.8855	13	1000000011
128.563	155.446	43	13	1000000015
129.25	170.691	38.2945	13	1000000010
190.277	196.44	33.5232	13	1000000012
18.5674	108.878	4.37584	13	1000000019
84.7745	154.635	37.0599	13	1000000022
136.545	83.9297	13.3594	13	1000000016
100.655	150.5	25	13	1000000017
72.2311	204.985	22.8485	13	1000000025
145.96	145.211	31	13	1000000018
104.531	86.3369	41	13	1000000020
2.22739	43.6283	7.9379	13	1000000021
72.1686	52.424	16.6457	14	1000000000
142.133	54.1975	14.8169	14	1000000001
148.342	37.2475	20.6764	14	1000000002
196.002	20.8419	25.1246	14	1000000003
23.9441	119.873	12.7094	14	1000000004
28.8492	115.886	24.2502	14	1000000005
109.57	159.887	15.4411	14	1000000009
118.329	112.304	21.3675	14	1000000013
163.594	95.0305	24.9367	14	1000000023
181.567	102.571	27.3015	14	1000000008
187.87	85.6443	29.562	14	1000000007
194.367	124.184	29.6946	14	1000000014
49.4384	202.961	16.2737	14	1000000024
199.167	182.274	25.2827	14	1000000011
134.484	101.752	32.9441	14	1000000006
132.683	156.259	43	14	1000000015
129.195	171.614	37.1186	14	1000000010
191.966	195.496	33.8131	14	1000000012
17.9388	109.085	5.07983	14	1000000019
85.6479	155.203	36.3962	14	1000000022
135.457	81.3568	13.0088	14	1000000016
98.8662	149.391	27	14	1000000017
74.1403	203.829	23.6891	14	1000000025
147.39	144.368	27	14	1000000018
102.15	89.4419	43	14	1000000020
5.66348	44.2551	7	14	1000000021
71.187	52.9541	15.4934	15	1000000000
142.097	55.2722	15.1086	15	1000000001
149.113	37.843	21.5705	15	1000000002
194.516	22.243	26.1439	15	1000000003
18.0102	110.848	4.76216	15	1000000019
23.4672	124.258	12.4318	15	1000000004
28.3817	115.34	23.5192	15	1000000005
110.227	160.842	15.3194	15	1000000009
118.279	114.515	22.8714	15	1000000013
163.131	95.485	25.6692	15	1000000023
181.823	103.521	24.7681	15	1000000008
189.508	85.1628	29.2453	15	1000000007
195.114	125.278	29.5068	15	1000000014
49.258	203.543	16.2502	15	1000000024
200.937	181.764	26.9681	15	1000000011
136.89	100.19	33.5218	15	1000000006
132.515	157.754	43	15	1000000015
130.665	174.599	34.9611	15	1000000010
192.65	197.759	36.9394	15	1000000012
86.9179	155.235	34.9264	15	1000000022
136.378	79.7728	12.5618	15	1000000016
98.3395	148.487	25	15	1000000017
73.5039	203.139	22.6595	15	1000000025
147.339	143.411	29	15	1000000018
103.516	90.5443	43	15	1000000020
7.1444	46.4004	7	15	1000000021
70.7973	52.1784	15.2247	16	1000000000
142.512	55.0781	15.5127	16	1000000001
150.049	38.9729	22.4379	16	1000000002
192.146	23.3436	25.4083	16	1000000003
17.4212	111.094	5.27575	16	1000000019
23.4194	126.057	13.8745	16	1000000004
27.1395	112.28	23.7766	16	1000000005
112.789	160.705	15.713	16	1000000009
119.552	114.076	23.4314	16	1000000013
162.41	94.9632	26.468	16	1000000023
137.178	98.4963	31.5743	16	1000000006
181.032	102.473	24.5226	16	1000000008
188.328	83.5315	28.8517	16	1000000007
194.562	124.843	29.1716	16	1000000014
48.8919	201.333	15.8208	16	1000000024
200.84	180.613	26.6464	16	1000000011
132.291	158.839	43	16	1000000015
129.71	175.722	34.148	16	1000000010
192.491	198.685	36.4613	16	1000000012
86.221	154.435	34.2668	16	1000000022
134.997	77.5212	12.7412	16	1000000016
98.6178	148.209	25	16	1000000017
71.5947	203.039	25.3213	16	1000000025
145.282	140.821	27	16	1000000018
104.882	88.8892	43	16	1000000020
8.86108	48.5782	9	16	1000000021
69.91	51.2282	15.3862	17	1000000000
141.566	56.6815	15.1659	17	1000000001
149.993	39.5714	22.6775	17	1000000002
191.409	24.0884	25.6627	17	1000000003
16.3601	111.133	5.5075	17	1000000019
23.687	125.956	14.4718	17	1000000004
25.2225	109.509	22.9841	17	1000000005
113.033	160.525	15.0112	17	1000000009
122.529	114.846	22.9494	17	1000000013
161.835	94.535	26.5204	17	1000000023
137.741	98.7929	30.5079	17	1000000006
182.083	99.7541	21.4059	17	1000000008
189.399	82.2778	28.8965	17	1000000007
195.434	125.445	29.5356	17	1000000014
49.0556	200.926	13.8424	17	1000000024
199.888	180.033	26.777	17	1000000011
130.829	158.095	38.5104	17	1000000015
127.1	174.654	32.8529	17	1000000010
191.129	198.927	35.6224	17	1000000012
85.4966	153.473	33.506	17	1000000022
131.445	77.9242	12.7875	17	1000000016
99.1446	146.243	25	17	1000000017
72.8675	201.988	25.0833	17	1000000025
143.985	139.156	27	17	1000000018
107.826	82.4559	41	17	1000000020
7.4953	50.0253	7	17	1000000021
70.433	50.1466	15.3489	18	1000000000
142.363	56.3857	16.9914	18	1000000001
149.989	39.0405	24.0818	18	1000000002
188.602	24.7132	24.8725	18	1000000003
190.103	79.7328	29.4982	18	1000000007
16.3496	110.484	5.04704	18	1000000019
22.6645	125.296	13.5045	18	1000000004
22.937	106.541	23.5727	18	1000000005
114.51	158.135	16.5323	18	1000000009
122.081	112.54	22.5392	18	1000000013
158.103	95.8594	28.8729	18	1000000023
139.227	96.4927	28.4662	18	1000000006
181.718	99.368	21.227	18	1000000008
194.325	126.144	30.4096	18	1000000014
50.6651	199.357	14.6371	18	1000000024
200.039	179.968	26.5797	18	1000000011
128.824	154.778	37.5661	18	1000000015
125.184	172.624	33.1117	18	1000000010
190.693	197.122	37.2881	18	1000000012
86.5998	152.576	34.3679	18	1000000022
129.41	77.3614	14.7097	18	1000000016
99.4054	145.116	25	18	1000000017
72.2311	199.629	26.7482	18	1000000025
146.15	138.515	31	18	1000000018
107.556	76.0754	41	18	1000000020
6.72783	52.9534	7	18	1000000021
71.0693	47.1835	16.7342	19	1000000000
141.237	57.7672	17.2972	19	1000000001
148.78	37.5003	23.8718	19	1000000002
187.047	24.5999	24.05	19	1000000003
189.369	77.4775	26.3443	19	1000000007
16.0535	110.11	4.83134	19	1000000019
21.7693	125.414	14.932	19	1000000004
21.8076	104.641	23.5827	19	1000000005
116.958	158.078	19.0482	19	1000000009
119.415	109.663	22.0879	19	1000000013
139.524	94.5107	27.9779	19	1000000006
157.522	96.6299	27.6255	19	1000000023
182.521	98.7249	23.4298	19	1000000008
195.186	125.37	30.7834	19	1000000014
51.3623	198.064	14.6713	19	1000000024
200.09	178.623	27.1367	19	1000000011
126.466	151.927	37.2594	19	1000000015
125.302	170.416	32.5846	19	1000000010
190.83	196.545	37.0203	19	1000000012
87.4789	151.1	33.5369	19	1000000022
127.563	75.7477	16.5109	19	1000000016
100.723	143.524	27	19	1000000017
72.8675	196.534	28.1474	19	1000000025
146.213	137.081	27	19	1000000018
106.459	73.5747	41	19	1000000020
10.3211	53.6161	9	19	1000000021
72.352	44.7315	17.1596	20	1000000000
141.633	56.625	17.4181	20	1000000001
145.55	36.3286	23.4914	20	1000000002
185.932	24.665	25.7292	20	1000000003
189.096	76.3365	25.4455	20	1000000007
15.6958	109.202	5.14585	20	1000000019
21.6148	124.154	14.2452	20	1000000004
19.7785	102.19	25.0437	20	1000000005
119.38	106.772	21.501	20	1000000013
120.014	159.278	20.4608	20	1000000009
158.273	96.9352	26.2889	20	1000000023
140.472	93.6697	28.7206	20	1000000006
183.311	96.2583	24.8551	20	1000000008
194.059	123.065	30.7513	20	1000000014
50.8335	196.584	14.9444	20	1000000024
201.226	179.145	26.6655	20	1000000011
125.09	148.558	35.88	20	1000000015
124.502	168.807	32.091	20	1000000010
189.603	195.918	36.3531	20	1000000012
88.4646	151.03	36.2477	20	1000000022
123.209	74.7224	17.6703	20	1000000016
101.895	141.478	25	20	1000000017
72.2311	193.214	29.0585	20	1000000025
145.085	133.959	25	20	1000000018
105.836	72.3116	39	20	1000000020
11.4427	52.8662	9	20	1000000021
73.3014	45.0736	17.2426	21	1000000000
143.012	56.52	16.1644	21	1000000001
144.277	35.7563	23.1269	21	1000000002
189.057	75.5464	25.7396	21	1000000007
186.068	24.8098	26.5971	21	1000000003
17.1228	108.316	4.82666	21	1000000019
21.3979	124.245	13.6728	21	1000000004
18.6886	99.9638	24.645	21	1000000005
120.264	105.605	20.4954	21	1000000013
119.305	157.499	20.6684	21	1000000009
141.608	91.031	26.4757	21	1000000006
158.673	97.5816	27.3597	21	1000000023
182.497	97.0577	23.3084	21	1000000008
194.563	121.456	31.0794	21	1000000014
50.3715	196.601	14.8993	21	1000000024
203.032	179.696	26.6576	21	1000000011
123.413	147.395	34.5583	21	1000000015
126.021	166.121	33.9393	21	1000000010
190.106	195.196	37.597	21	1000000012
86.9874	149.981	36.251	21	1000000022
125.881	74.5673	17.7087	21	1000000016
101.4	141.09	23	21	1000000017
72.2311	192.401	29.1415	21	1000000025
143.98	132.75	25	21	1000000018
104.618	68.7424	43	21	1000000020
16.119	52.0588	11	21	1000000021
71.4342	43.6541	18.4507	22	1000000000
142.384	54.7219	17.0711	22	1000000001
143.435	32.7283	24.8968	22	1000000002
189.443	74.195	25.0215	22	1000000007
185.137	25.0819	26.6782	22	1000000003
16.0356	106.751	5.37182	22	1000000019
19.7159	123.892	14.6772	22	1000000004
17.4458	96.3444	25.537	22	1000000005
119.54	101.457	19.9775	22	1000000013
117.626	155.616	20.3167	22	1000000009
157.83	96.4259	27.506	22	1000000023
143.715	88.1229	28.4255	22	1000000006
181.749	94.6813	23.3388	22	1000000008
192.954	118.751	30.6309	22	1000000014
48.698	194.007	16.5347	22	1000000024
202.29	176.615	26.135	22	1000000011
122.498	145.748	34.7694	22	1000000015
128.018	162.102	34.7928	22	1000000010
188.051	193.745	36.2534	22	1000000012
85.7231	145.437	34.537	22	1000000022
126.946	74.5488	19.8068	22	1000000016
100.457	140.885	25	22	1000000017
70.3219	186.815	34.5763	22	1000000025
141.338	129.604	25	22	1000000018
100.79	65.1331	43	22	1000000020
15.5938	51.7319	13	22	1000000021
72.7506	45.1907	17.692	23	1000000000
144.691	55.594	16.318	23	1000000001
141.16	30.5132	25.6482	23	1000000002
188.151	72.8826	24.7463	23	1000000007
185.125	24.1738	28.6967	23	1000000003
18.0883	105.608	4.9065	23	1000000019
18.9861	125.161	14.5099	23	1000000004
17.0875	95.1109	25.1682	23	1000000005
120.278	99.6373	19.1893	23	1000000013
121.263	153.841	20.3133	23	1000000009
156.999	96.1893	27.3372	23	1000000023
146.367	84.9937	29.259	23	1000000006
181.175	94.3868	23.1712	23	1000000008
189.512	117.384	30.667	23	1000000014
50.6575	189.97	18.5193	23	1000000024
201.745	175.55	27.6085	23	1000000011
122.287	142.548	35.1059	23	1000000015
126.082	161.739	35.0955	23	1000000010
187.859	192.622	36.2127	23	1000000012
85.029	143.832	32.0667	23	1000000022
128.845	73.5189	20.1243	23	1000000016
99.8685	140.022	25	23	1000000017
70.3219	185.54	33.9176	23	1000000025
140.548	126.961	25	23	1000000018
94.4851	62.8887	43	23	1000000020
14.6495	49.5696	11	23	1000000021
71.3577	42.4464	18.9335	24	1000000000
147.573	55.9247	18.2893	24	1000000001
138.706	28.0819	26.4973	24	1000000002
186.796	71.7511	24.044	24	1000000007
186.676	22.5428	27.4087	24	1000000003
17.4081	104.608	4.95444	24	1000000019
19.132	125.538	15.1006	24	1000000004
16.5999	95.2244	25.3209	24	1000000005
119.259	98.0172	18.8566	24	1000000013
124.676	152.153	20.3991	24	1000000009
154.563	98.8877	27.2235	24	1000000023
146.284	84.7901	28.652	24	1000000006
179.125	93.7415	23.8984	24	1000000008
53.152	187.152	18.7394	24	1000000024
202.761	177.34	29.648	24	1000000011
121.331	143.181	35.6988	24	1000000015
125.006	160.968	35.1583	24	1000000010
190.054	117.959	32.6359	24	1000000014
188.755	194.001	35.4438	24	1000000012
85.5159	143.53	34.4901	24	1000000022
130.813	70.0596	20.2503	24	1000000016
99.7533	137.86	27	24	1000000017
70.9583	183.478	36.7694	24	1000000025
139.409	126.222	25	24	1000000018
92.3814	62.2581	37	24	1000000020
15.3961	48.1142	11	24	1000000021
72.6249	41.2895	18.713	25	1000000000
149.186	57.007	18.8591	25	1000000001
138.881	22.899	28.7412	25	1000000002
185.585	70.7013	24.9858	25	1000000007
187.74	22.4988	26.2909	25	1000000003
18.1288	105.536	4.56053	25	1000000019
19.9722	126.2	14.8676	25	1000000004
16.4795	93.8484	24.6841	25	1000000005
119.525	96.5203	18.8422	25	1000000013
127.122	151.029	21.578	25	1000000009
145.166	83.0922	28.4786	25	1000000006
152.596	99.6263	28.1079	25	1000000023
180.118	93.2702	24.1737	25	1000000008
53.3918	186.945	18.512	25	1000000024
120.381	143.266	35.3727	25	1000000015
124.464	158.827	35.4215	25	1000000010
190.284	117.067	33.5602	25	1000000014
202.102	178.157	32.1499	25	1000000011
187.237	193.681	35.6413	25	1000000012
85.0434	142.342	33.6724	25	1000000022
131.285	67.024	21.5292	25	1000000016
99.7533	137.86	27	25	1000000017
73.5039	180.049	41.4084	25	1000000025
137.362	124.367	27	25	1000000018
91.8219	59.7175	37	25	1000000020
15.0196	49.5615	11	25	1000000021
74.6783	39.2075	15.7639	26	1000000000
148.502	58.5439	18.3395	26	1000000001
138.531	20.255	28.8415	26	1000000002
186.743	22.3276	25.5765	26	1000000003
185.468	70.4564	25.6866	26	1000000007
17.5112	105.455	3.05078	26	1000000019
19.8802	127.44	15.1367	26	1000000004
16.0822	92.5698	23.5041	26	1000000005
119.522	96.6501	19.0525	26	1000000013
125.659	149.61	21.0211	26	1000000009
142.589	83.6242	28.8973	26	1000000006
150.937	99.5	29.6214	26	1000000023
180.005	93.0555	24.8535	26	1000000008
53.649	188.06	17.8119	26	1000000024
120.044	142.031	34.5935	26	1000000015
122.411	158.253	34.1167	26	1000000010
190.296	114.688	33.3796	26	1000000014
200.802	177.946	32.2689	26	1000000011
186.906	194.563	35.4897	26	1000000012
85.8052	143.095	33.6718	26	1000000022
66.6679	135.643	21.0402	26	1000000026
126.243	66.9774	23.8564	26	1000000016
98.1562	139.992	25	26	1000000017
72.8675	177.596	42.9199	26	1000000025
134.739	125.035	27	26	1000000018
90.703	59.1472	37	26	1000000020
17.2381	49.8734	11	26	1000000021
77.6382	37.2083	15.0579	27	1000000000
150.309	58.6096	17.9171	27	1000000001
137.609	17.059	27.7897	27	1000000002
[truncated: 1,887 more rows]

## Sheet: NCadM-4-ControlSide
Position
[truncated: 17,395 more rows]

## Sheet: NCadM-4-NcadMSide
Position
[truncated: 15,910 more rows]

## Sheet: NCadM-5-ControlSide
Position
[truncated: 18,365 more rows]

[truncated: 1 more sheets: NCadM-5-NcadMSide]
