# Supplementary material for: Migrating mesoderm cells self-organize into a dynamic meshwork structure during chick gastrulation
Source: eLife. 2025 Aug 21;14:e84749. doi: 10.7554/eLife.84749 (PMC12578438; doi:10.7554/eLife.84749)
Supplement: Figure 6—source data 1. [file elife-84749-fig6-data1.xlsx]

## Sheet: hole_size
	a	b	c	d
0	7.955	5.59	6.45	5.16
1	9.03	5.59	5.59	5.59
2	13.545	5.16	5.59	6.45
3	8.815	9.675	6.02	5.16
4	17.415	9.89	5.16
5	6.235	7.525	5.16
6	5.59	7.525	5.16
7	15.695	5.59	5.59
8	12.685	8.385	5.375
9	6.02	5.59	5.59
10	6.235	5.16	7.74
11	6.235	8.17	6.88
12	11.61	7.095	6.02
13	5.375	5.16	6.45
14	6.665	7.31	7.525
15	5.16	5.375	8.17
16	20.855	8.385	8.6
17	9.675	6.02	5.59
18	5.16	6.235	8.17
19	7.955	7.74	6.235
20	5.375	5.805	9.03
21		5.375	9.675
22		5.805	8.385
23		5.375	6.235
24		7.525	9.89
25		8.6
26		9.675
27		9.03
28		9.675
29		7.955
30		6.02
31		6.665
32		10.965
33		6.235
34		8.385
35		8.17
36		6.02
37		11.395
38		7.74
39		5.805
40		9.245
41		12.04

## Sheet: median
		time	median
0	0	a	8
1	1	b	7.4
2	2	c	6.2
3	3	d	5.4
