# Supplementary material for: Migrating mesoderm cells self-organize into a dynamic meshwork structure during chick gastrulation
Source: eLife. 2025 Aug 21;14:e84749. doi: 10.7554/eLife.84749 (PMC12578438; doi:10.7554/eLife.84749)
Supplement: Figure 6—source data 2. [file elife-84749-fig6-data2.xlsx]

## Sheet: hole_size
	3900	4400	4700	5300
0	28	13.75	11.75	11.5
1	12.25	16	11
2	32.75	10.5	13.5
3	15.25	12.75	17.5
4	10.25	18.25	17
5	15.5	19.75	19.75
6	10.75	12.25	12.25
7	11.5	19	13.5
8	11	21.75	11
9	19.75	17.5	11.75
10	23.5	25.25	15
11	14.25	11.5	11.75
12	28.75	22.25
13		21.75

## Sheet: median
		time	median
0	0	3900	15.2
1	1	4400	17.9
2	2	4700	12.9
3	3	5300	11.5
