# Supplementary figures and images for: Migrating mesoderm cells self-organize into a dynamic meshwork structure during chick gastrulation
Source: eLife journal article supplement (doi:10.7554/elife.84749), 2025-08-21

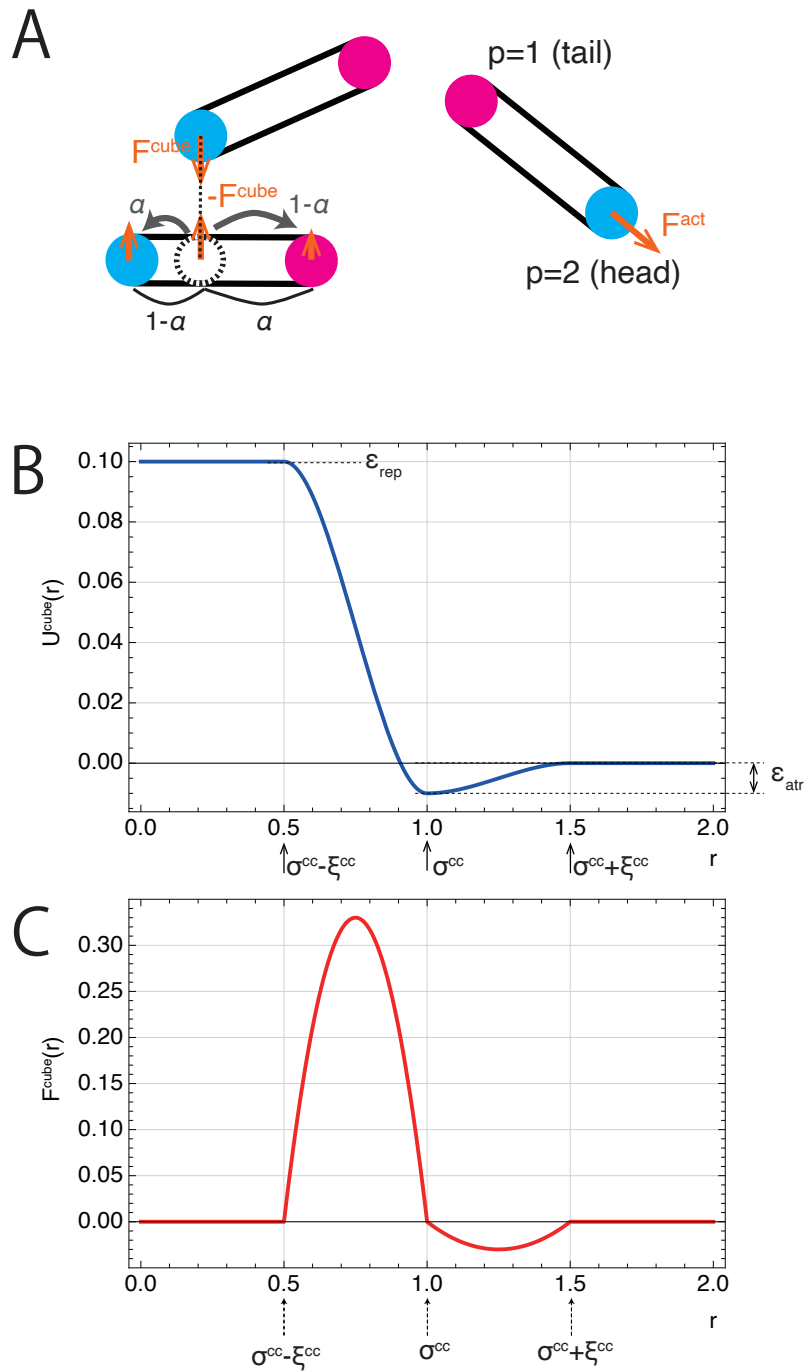

Figure 5 figure supplement 1 Nakaya et al.

Supplement: supp [file elife-84749-supp-v1.zip]

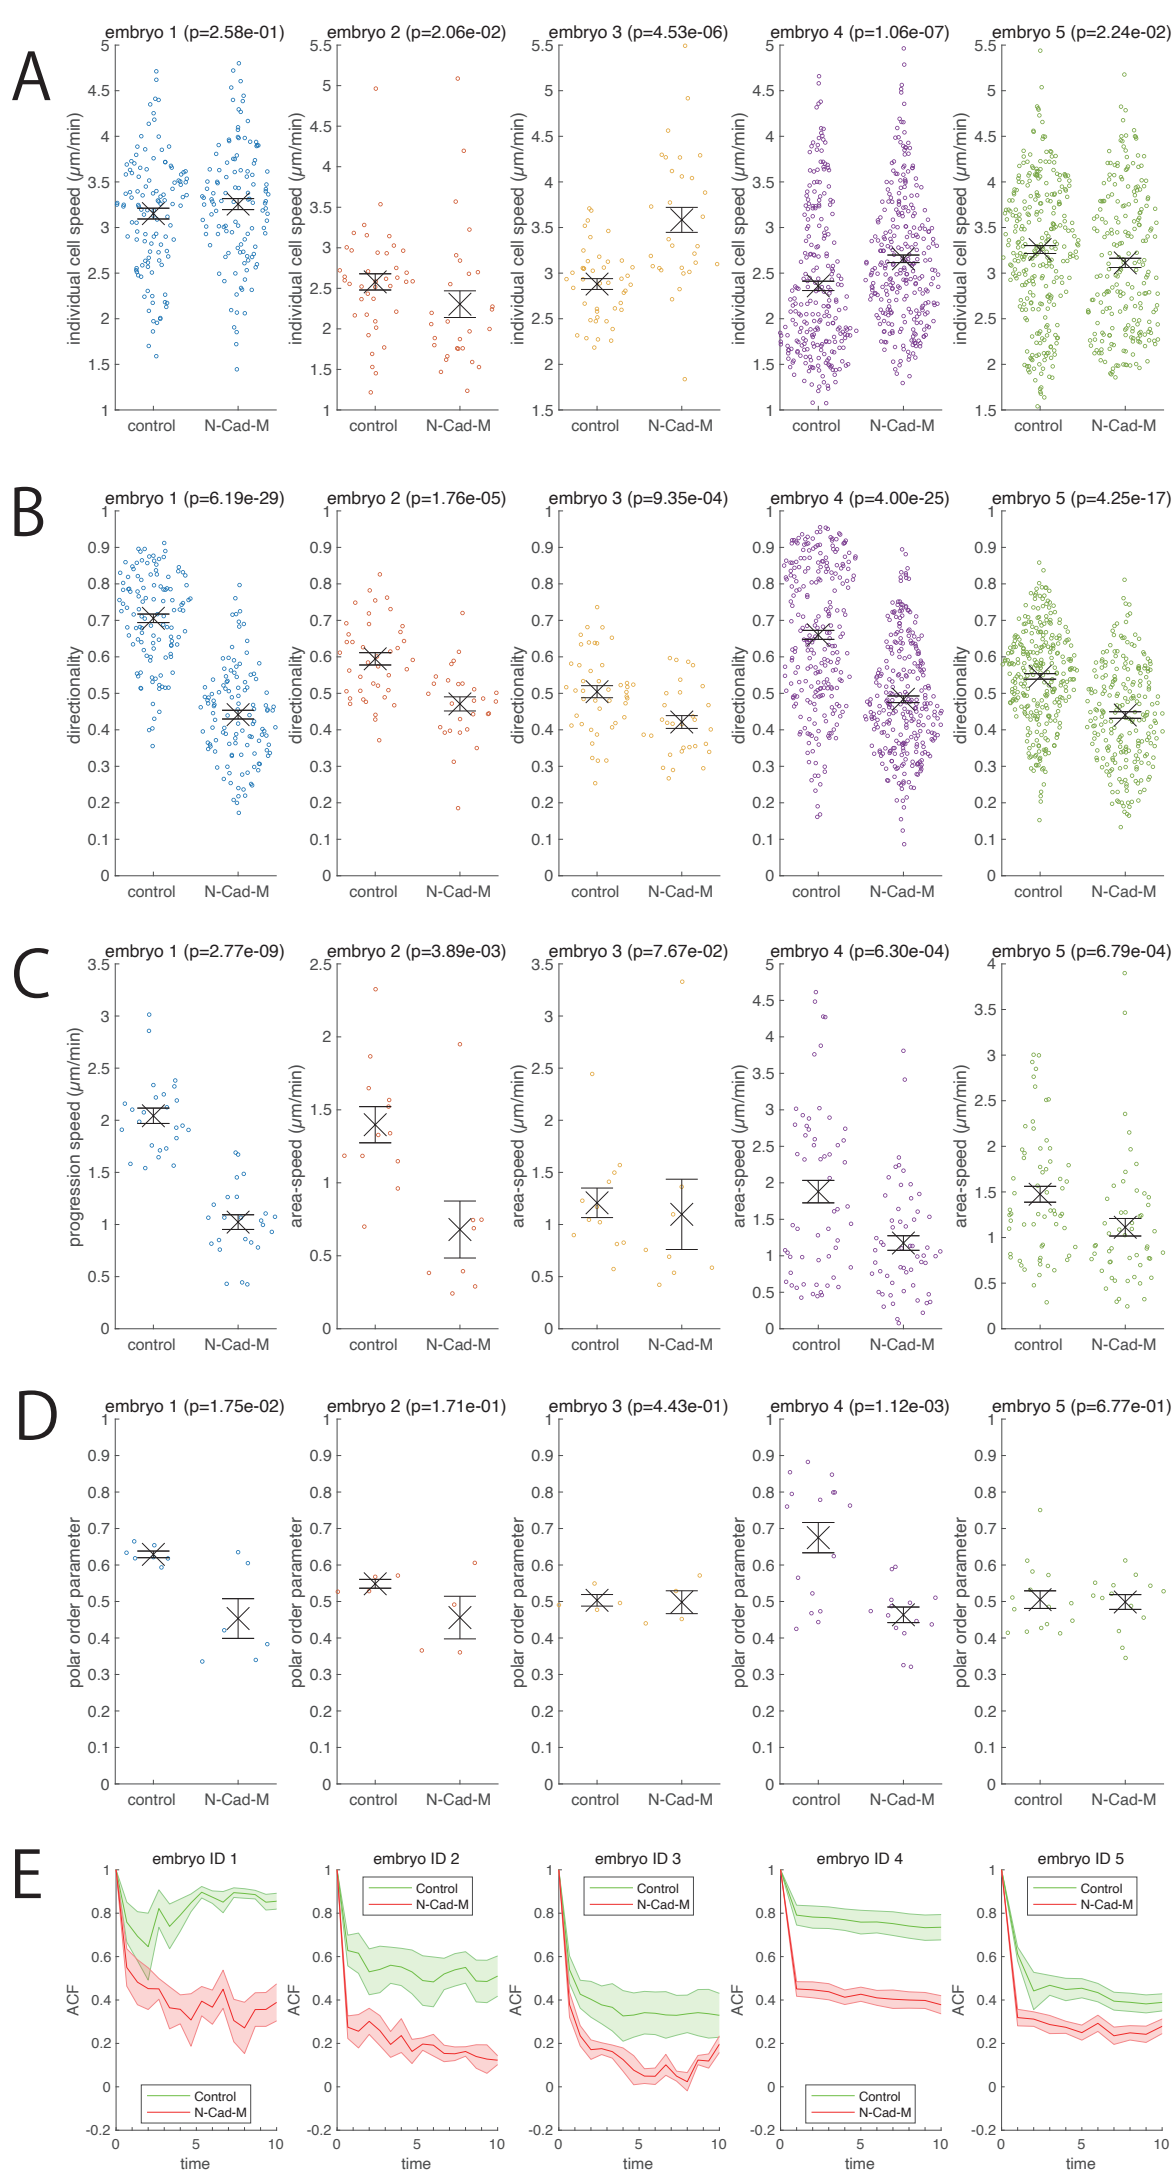

Figure 4 figure supplement 2 Nakaya et al.

Supplement: supp [file elife-84749-supp-v1.zip]

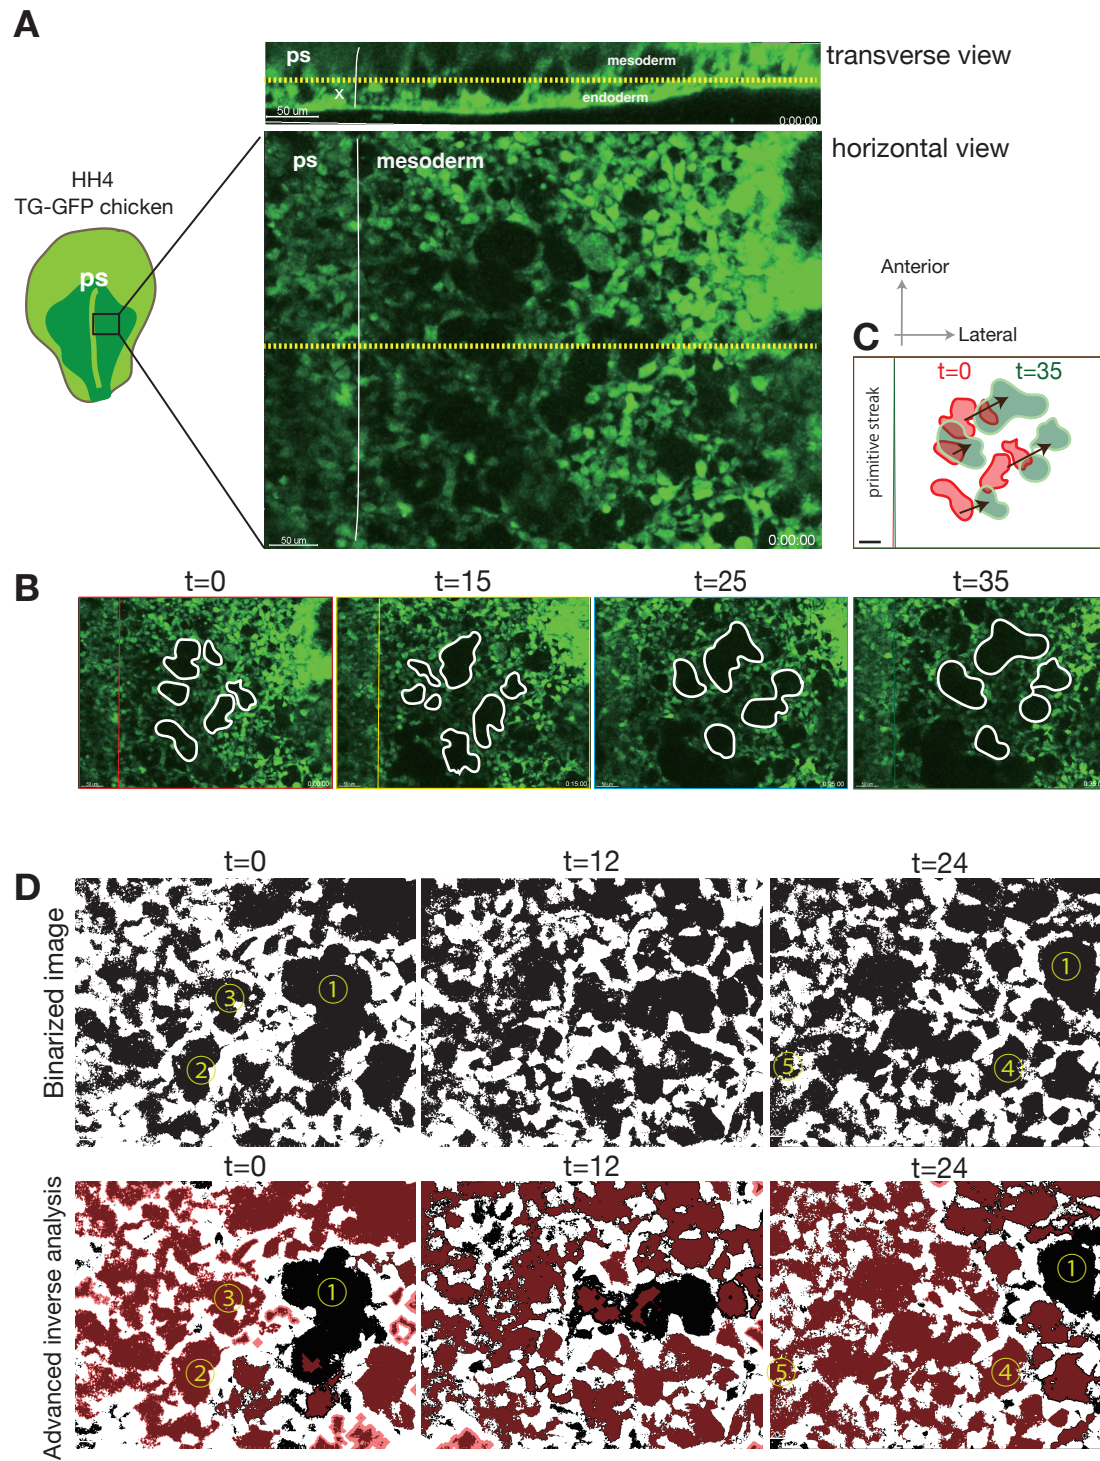

Supplement: supp [file elife-84749-supp-v1.zip]

### Control cells

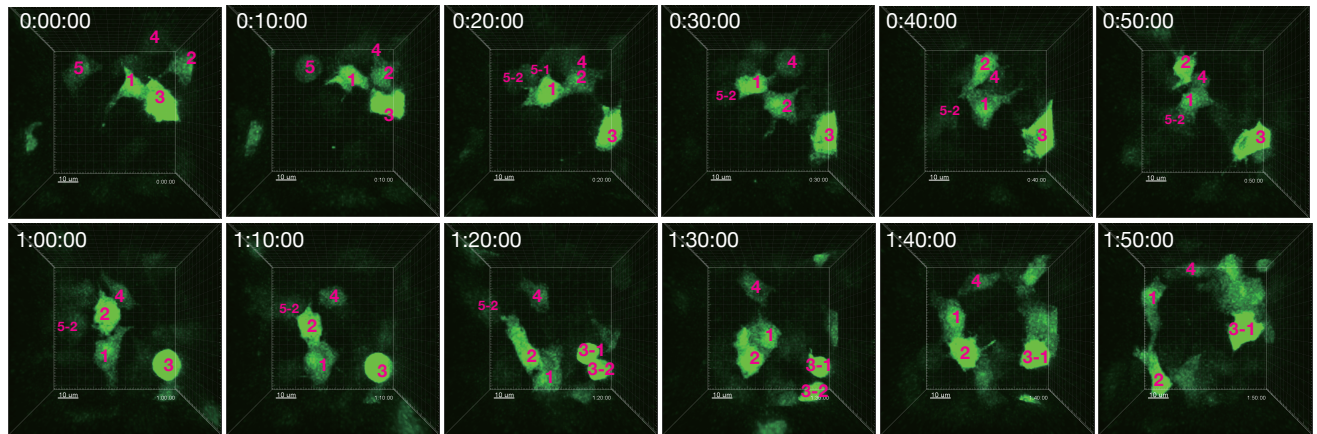

### N-Cad-M expressing cells

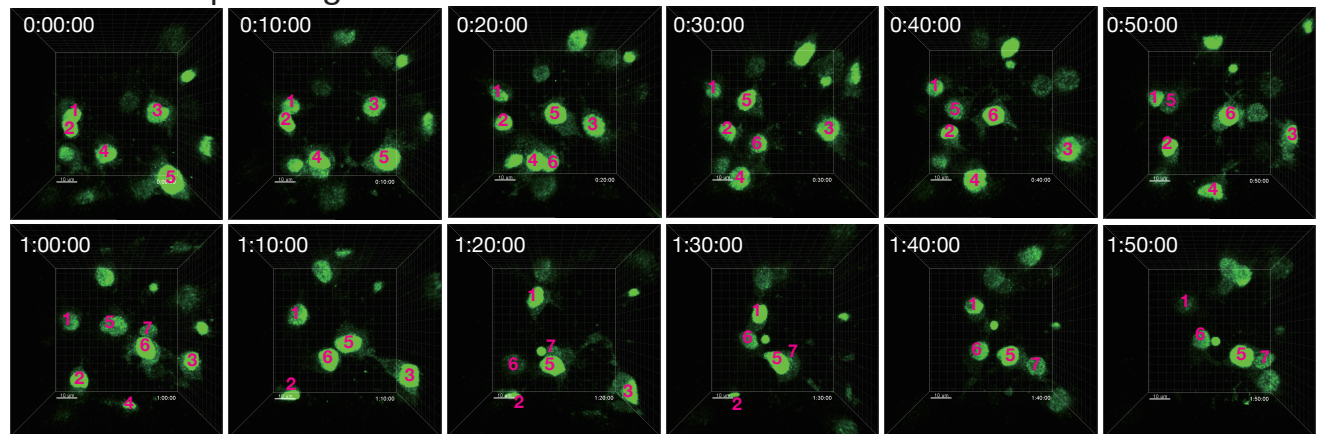

Figure 4 figure supplement 3 Nakaya et al.

Supplement: supp [file elife-84749-supp-v1.zip]

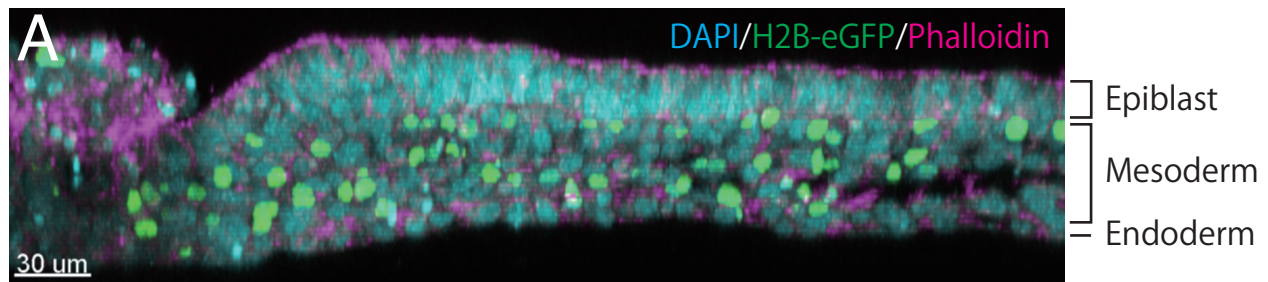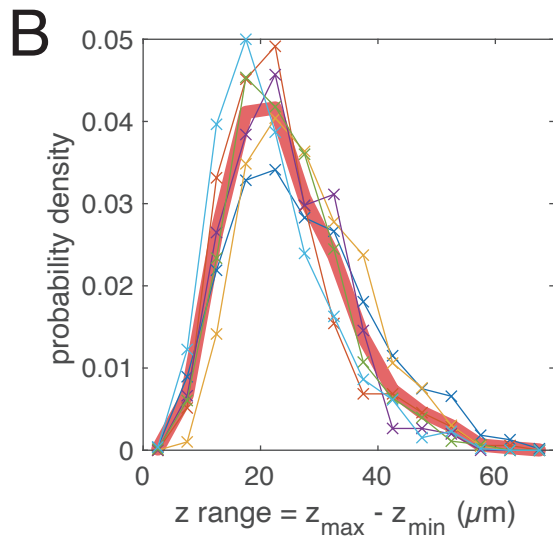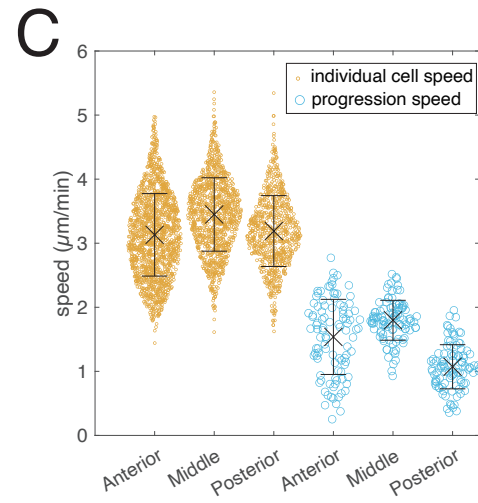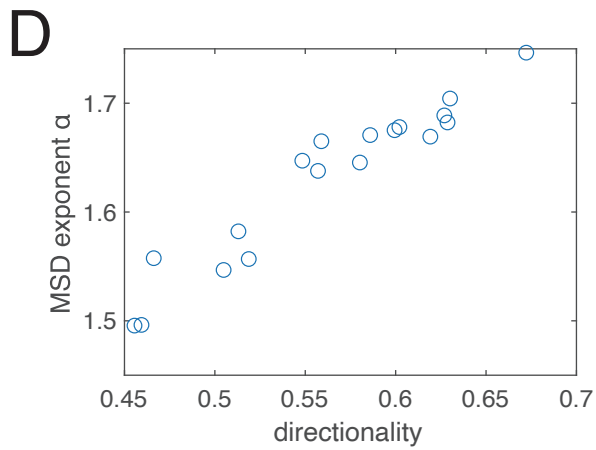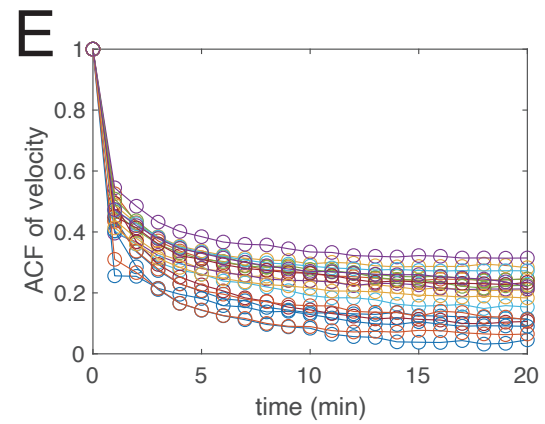

Figure 1 figure supplement 1 Nakaya et al.

Supplement: supp [file elife-84749-supp-v1.zip]

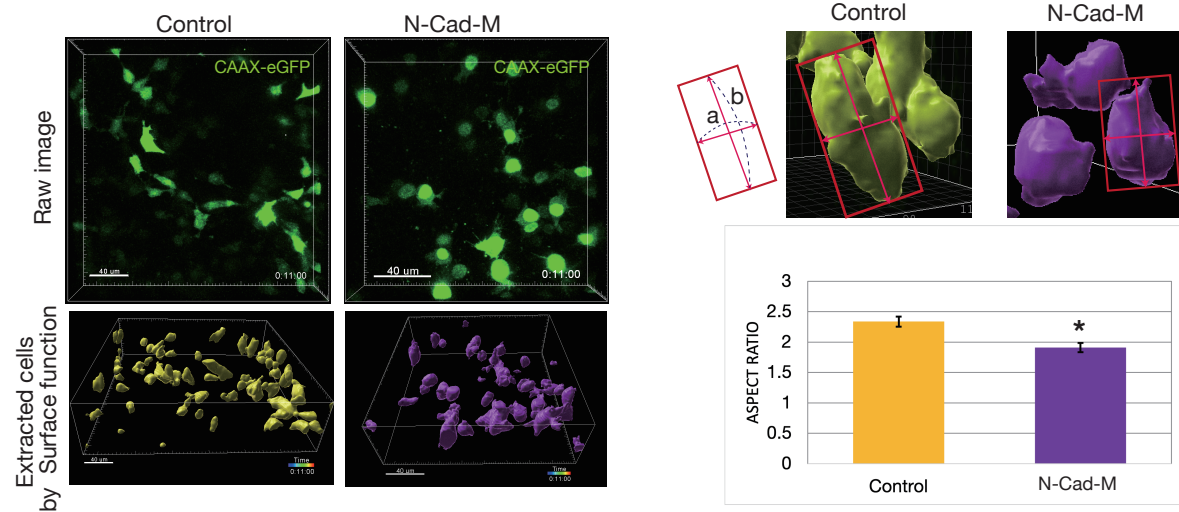

Figure 4 figure supplement 1 Nakaya et al.

Supplement: supp [file elife-84749-supp-v1.zip]

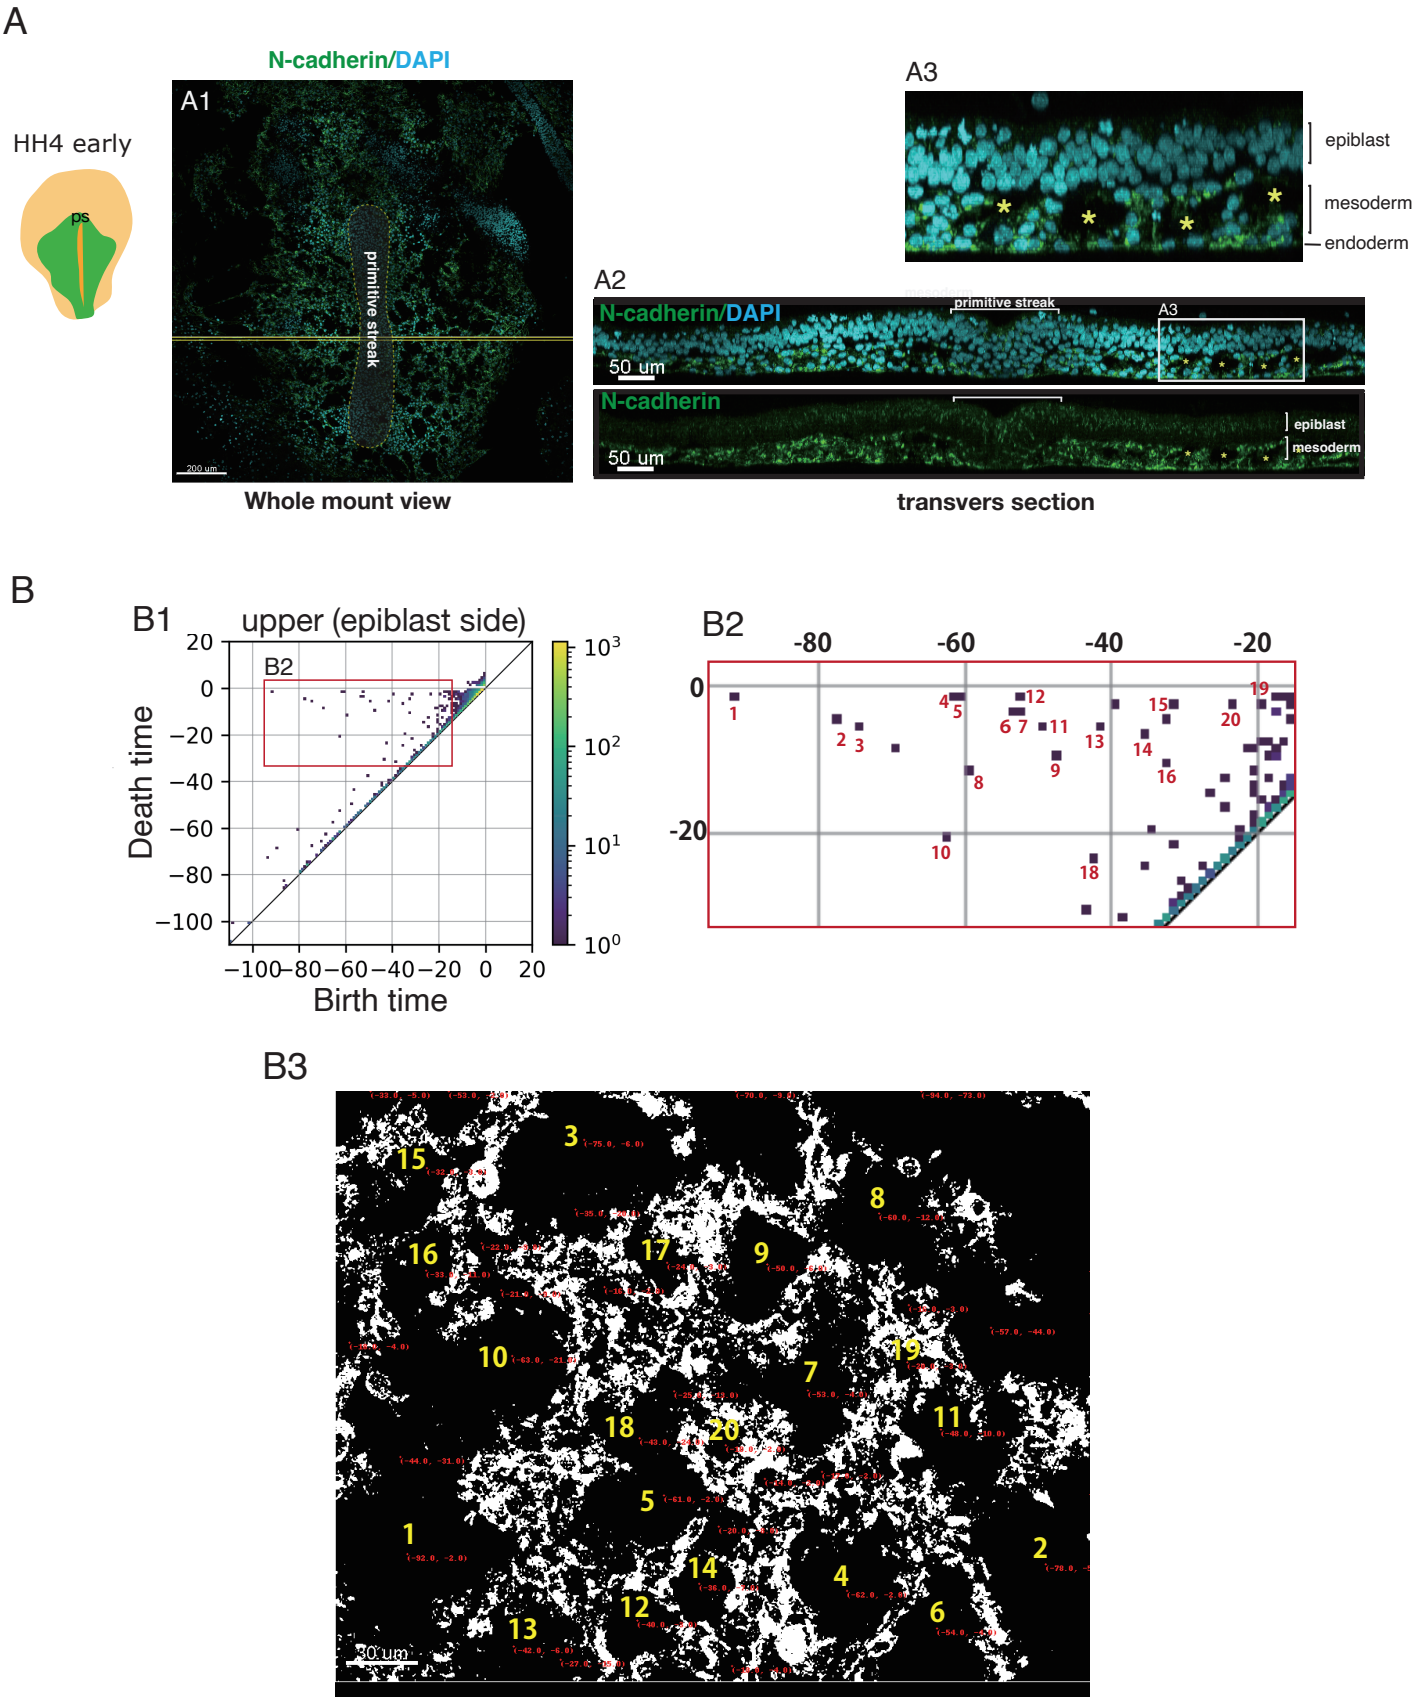

Figure 2 figure supplement 1 Nakaya et al.

Supplement: supp [file elife-84749-supp-v1.zip]
